# Supplementary material for: Catalytic asymmetric conjugate addition of terminal alkynes to β-trifluoromethyl α,β-enones
Source: Royal Society of Chemistry journal article supplement (doi:10.1039/c3cc48508k), 2014-01-01
Supplement: c3cc48508k.pdf [file c3cc48508k.pdf]

## Catalytic asymmetric conjugate addition of terminal alkynes to $\beta$ -trifluoromethyl $\alpha,\beta$ -enones†

Amparo Sanz-Marco,<sup>a</sup> Andrea García-Ortiz,<sup>a</sup> Gonzalo Blay<sup>\*a</sup> and José R. Pedro<sup>\*a</sup>

*Departament de Química Orgànica, Facultat de Química, Universitat de València, C/*

*Dr. Moliner, 50, E-46100 Burjassot (València), Spain*

### SUPPORTING INFORMATION

#### Table of Contents:

|                                                                     |     |
|---------------------------------------------------------------------|-----|
| General Experimental Methods                                        | S2  |
| Typical procedures and characterization data for compounds <b>3</b> | S2  |
| Determination of the absolute configuration of (S)-(-)- <b>3aa</b>  | S11 |
| Synthesis of compounds <b>6</b> and <b>7</b>                        | S12 |
| NMR spectra                                                         | S14 |
| Chiral analysis chromatograms                                       | S82 |

## General Experimental Methods

Reactions were carried out under nitrogen in round bottom flasks oven-dried overnight at 120 °C. Commercial reagents were used as purchased.  $\beta$ -Trifluoromethyl- $\alpha,\beta$ -enones **1** were prepared from the corresponding substituted acetophenones and trifluoroacetaldehyde hemiacetal as described in the literature.<sup>1</sup> Toluene was distilled from CaH<sub>2</sub>. Tetrahydrofuran (THF) was distilled from Na. Triethylamine was dried and stored on 4 Å molecular sieves. Reactions were monitored by TLC analysis using Merck Silica Gel 60 F-254 thin layer plates. Flash column chromatography was performed on Merck silica gel 60, 0.040-0.063 mm. Melting points were determined in capillary tubes. NMR spectra were run at 300 MHz for <sup>1</sup>H and at 75 MHz for <sup>13</sup>C NMR using residual nondeuterated solvent (CHCl<sub>3</sub>) as internal standard ( $\delta$  7.26 and 77.0 ppm, respectively), and at 282 MHz for <sup>19</sup>F NMR using CFCl<sub>3</sub> as internal standard. Chemical shifts are given in ppm. The carbon type was determined by DEPT experiments. High resolution mass spectra (ESI) were recorded on a Q-TOF spectrometer equipped with an electrospray source with a capillary voltage of 3.3 kV (ESI). Specific optical rotations were measured using sodium light (D line 589 nm). Chiral HPLC analyses were performed in a chromatograph equipped with a UV diode-array detector using chiral stationary columns from Daicel.

## Typical procedures and characterization data for compounds 3

### General procedure for the enantioselective alkynylation reaction

[Cu(CH<sub>3</sub>CN)<sub>4</sub>]BF<sub>4</sub> (5.7 mg, 0.018 mmol) and **L4** (12.4 mg, 0.018 mmol) were placed in a dry round bottom flask which was purged with nitrogen. THF (0.2 mL) was added and the mixture was stirred for 1.5 h at room temperature. Then, a solution of  $\beta$ -trifluoromethyl- $\alpha,\beta$ -enone **2** (0.090 mmol) in dry THF (1.0 mL) was added via syringe, followed of triethylamine (12.5  $\mu$ L, 0.090 mmol). The solution was placed in a bath at 40 °C. After 10 min, the alkyne **1** (0.675mmol) was added and the solution was stirred at 40 °C under nitrogen until the reaction was complete (TLC). The reaction mixture was quenched with 20% aqueous NH<sub>4</sub>Cl (1.0 mL), extracted with CH<sub>2</sub>Cl<sub>2</sub> (2  $\times$  15 mL), washed with brine (15 mL), dried over MgSO<sub>4</sub> and concentrated under reduced pressure. Purification by flash chromatography on silica gel eluting with hexane:diethyl ether mixtures afforded compound **3**.

### (S)-(-)-3-(Trifluoromethyl)-1,5-diphenylpent-4-yn-1-one (**3aa**)

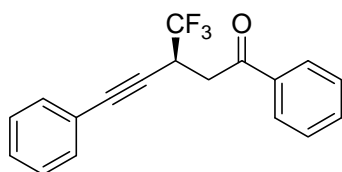

Purified by flash chromatography eluting with hexane-diethyl ether (99:01). Enantiomeric excess (85%) was determined by chiral HPLC (Chiralcel OD-H), hexane-*i*PrOH 99:01, 1 mL/min, major enantiomer  $t_r$  = 8.1 min, minor enantiomer  $t_r$  = 10.1 min.

$[\alpha]_D^{20}$  -34.7 (*c* 0.81, CHCl<sub>3</sub>, 85% *ee*); <sup>1</sup>H NMR (300 MHz, CDCl<sub>3</sub>)  $\delta$  8.03-7.99 (m, 2H), 7.62 (ddd, *J* = 6.6, 1.3 Hz, 2H), 7.40-7.37 (m, 2H), 7.31-7.24 (m, 3H), 4.29-4.16 (m,

1H), 3.60 (dd,  $J = 17.3, 8.9$  Hz, 1H), 3.42 (dd,  $J = 17.3, 4.2$  Hz, 1H);  $^{13}\text{C}$  NMR (75.5 MHz,  $\text{CDCl}_3$ )  $\delta$  194.5 (C), 136.1 (C), 133.8 (CH), 131.9 (2CH), 128.8 (2CH), 128.6 (CH), 128.2 (2CH), 125.3 (q,  $J_{\text{C-F}} = 263.0$  Hz,  $\text{CF}_3$ ), 122.0 (C), 84.3 (C), 81.4 (q,  $J_{\text{C-F}} = 6.5$  Hz, C), 38.3 ( $\text{CH}_2$ ), 33.7 (q,  $J_{\text{C-F}} = 41.2$  Hz, CH);  $^{19}\text{F}$  NMR (282 MHz,  $\text{CDCl}_3$ )  $\delta$  -71.6 (s, 3F); HRMS (ESI)  $m/z$ : 303.0893 ( $\text{M} + \text{H}^+$ ),  $\text{C}_{18}\text{H}_{14}\text{F}_3\text{O}$  requires 303.0991.

**(S)-(-)-3-(Trifluoromethyl)-5-phenyl-1-*p*-tolylpent-4-yn-1-one (3ab)**

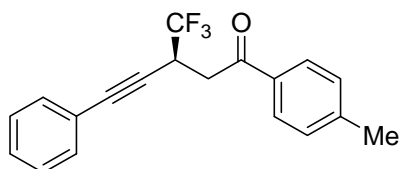

Purified by flash chromatography eluting with hexane-diethyl ether (99:01). Enantiomeric excess (80%) was determined by chiral HPLC (Chiralpak AD-H), hexane-*i*-PrOH 99:01, 1 mL/min, major enantiomer  $t_r = 8.1$  min, minor enantiomer  $t_r = 9.1$  min.

$[\alpha]_D^{20} -28.5$  ( $c$  0.89,  $\text{CHCl}_3$ , 80% *ee*);  $^1\text{H}$  NMR (300 MHz,  $\text{CDCl}_3$ )  $\delta$  7.92-7.88 (m, 2H), 7.40-7.36 (m, 2H), 7.31-7.26 (m, 5H), 4.26-4.19 (m, 1H), 3.56 (dd,  $J = 17.2, 8.9$  Hz, 1H), 3.39 (dd,  $J = 17.2, 4.2$  Hz, 1H), 2.43 (s, 3H);  $^{13}\text{C}$  NMR (75.5 MHz,  $\text{CDCl}_3$ )  $\delta$  194.1 (C), 144.7 (C), 133.6 (C), 131.9 (2CH), 129.5 (2CH), 128.6 (CH), 128.2 (2CH), 127.2 (2CH), 125.4 (q,  $J_{\text{C-F}} = 279.3$  Hz,  $\text{CF}_3$ ), 122.0 (C), 84.7 (C), 84.2 (C), 38.1 ( $\text{CH}_2$ ), 33.7 (q,  $J_{\text{C-F}} = 31.7$  Hz, CH), 21.7 ( $\text{CH}_3$ );  $^{19}\text{F}$  NMR (282 MHz,  $\text{CDCl}_3$ )  $\delta$  -71.6 (s, 3F); HRMS (ESI)  $m/z$ : 317.1148 ( $\text{M} + \text{H}^+$ ),  $\text{C}_{19}\text{H}_{16}\text{F}_3\text{O}$  requires 317.1141.

**(S)-(-)-3-(Trifluoromethyl)-1-(4-methoxyphenyl)-5-phenylpent-4-yn-1-one (3ac)**

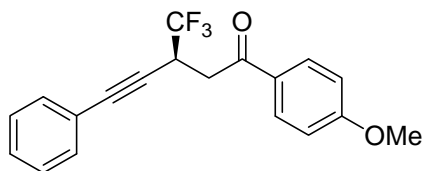

Purified by flash chromatography eluting with hexane-diethyl ether (99:01). Enantiomeric excess (80%) was determined by chiral HPLC (Chiralpak IC), hexane-*i*-PrOH 99:01, 1 mL/min, major enantiomer  $t_r = 9.0$  min, minor enantiomer  $t_r = 8.0$

min.

$[\alpha]_D^{20} -40.9$  ( $c$  0.91,  $\text{CHCl}_3$ , 80% *ee*);  $^1\text{H}$  NMR (300 MHz,  $\text{CDCl}_3$ )  $\delta$  7.88 (dt,  $J = 9, 3$  Hz, 2H), 7.29-7.26 (m, 2H), 7.19-7.16 (m, 3H), 6.89-6.84 (dt,  $J = 9, 3$  Hz, 2H), 4.16-4.09 (m, 1H), 3.70 (s, 3H), 3.43 (dd,  $J = 18, 9$  Hz, 1H), 3.25 (dd,  $J = 18, 3$  Hz, 1H);  $^{13}\text{C}$  NMR (75.5 MHz,  $\text{CDCl}_3$ )  $\delta$  193.0 (C), 164.0 (C), 131.9 (2CH), 130.6 (2CH), 129.2 (C), 128.6 (CH), 128.2 (2CH), 125.4 (q,  $J_{\text{C-F}} = 279.4$  Hz,  $\text{CF}_3$ ), 122.1 (C), 114.0 (2CH), 84.3 (C), 82.0 (q,  $J_{\text{C-F}} = 3.8$  Hz, C), 55.5 ( $\text{CH}_3$ ), 37.9 ( $\text{CH}_2$ ), 33.8 (q,  $J_{\text{C-F}} = 31.6$  Hz, CH);  $^{19}\text{F}$  NMR (282 MHz,  $\text{CDCl}_3$ )  $\delta$  -71.6 (s, 3F); HRMS (ESI)  $m/z$ : 333.1088 ( $\text{M} + \text{H}^+$ ),  $\text{C}_{19}\text{H}_{16}\text{F}_3\text{O}_2$  requires 333.1097.

**(S)-(-)-1-(4-Chlorophenyl)-3-(trifluoromethyl)-5-phenylpent-4-yn-1-one (3ad)**

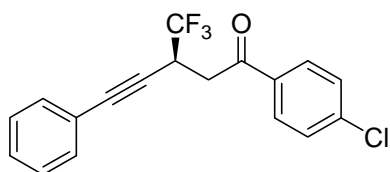

Purified by flash chromatography eluting with hexane-diethyl ether (99:01). Enantiomeric excess (80%) was determined by chiral HPLC (Chiralcel OD-H), hexane-*i*PrOH 99:01, 1 mL/min, major enantiomer  $t_r$  = 7.5 min, minor enantiomer  $t_r$  = 10.9 min.

$[\alpha]_D^{20}$  -32.7 (*c* 0.81, CHCl<sub>3</sub>, 80% *ee*); <sup>1</sup>H NMR (300 MHz, CDCl<sub>3</sub>)  $\delta$  7.95 (dt, *J* = 9.0, 3.0 Hz, 2H), 7.48 (dt, *J* = 9.0, 2.4 Hz, 2H), 7.40-7.36 (m, 2H), 7.31-7.24 (m, 3H), 4.27-4.14 (m, 1H), 3.55 (dd, *J* = 17.3, 8.9 Hz, 1H), 3.38 (dd, *J* = 17.3, 4.2 Hz, 1H); <sup>13</sup>C NMR (75.5 MHz, CDCl<sub>3</sub>)  $\delta$  193.4 (C), 140.4 (C), 134.4 (C), 131.9 (2CH), 129.6 (2CH), 129.2 (2CH), 128.7 (CH), 128.2 (CH), 125.4 (q, *J*<sub>C-F</sub> = 279.3 Hz, CF<sub>3</sub>), 121.9 (C), 84.5 (C), 81.6 (q, *J*<sub>C-F</sub> = 3.9 Hz, C), 38.3 (CH<sub>2</sub>), 33.7 (q, *J*<sub>C-F</sub> = 31.5 Hz, CH); <sup>19</sup>F NMR (282 MHz, CDCl<sub>3</sub>)  $\delta$  -71.7 (s, 3F); HRMS (ESI) *m/z*: 337.0592/339.0564 (M+H)<sup>+</sup> 100/32.0, C<sub>18</sub>H<sub>13</sub>F<sub>3</sub>O<sub>3</sub>Cl requires 337.0607/339.0578.

**(S)-(-)-3-(Trifluoromethyl)-1-(4-nitrophenyl)-5-phenylpent-4-yn-1-one (3ae)**

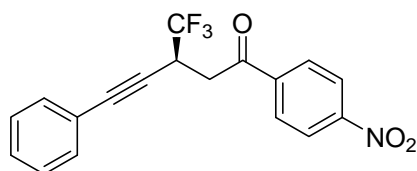

Purified by flash chromatography eluting with hexane-diethyl ether (95:05). Enantiomeric excess (70%) was determined by chiral HPLC (Chiralcel OD-H), hexane-*i*PrOH 95:05, 1 mL/min, major enantiomer  $t_r$  = 20.1 min, minor enantiomer  $t_r$  = 31.2

min.

$[\alpha]_D^{20}$  -25.2 (*c* 0.60, CHCl<sub>3</sub>, 70% *ee*); <sup>1</sup>H NMR (300 MHz, CDCl<sub>3</sub>)  $\delta$  8.35 (dt, *J* = 9.0, 3.0 Hz, 2H), 8.16 (dt, *J* = 9.0, 3.0 Hz, 2H), 7.40-7.25 (m, 5H), 4.27-4.15 (m, 1H), 3.63 (dd, *J* = 17.5, 8.9 Hz, 1H), 3.47 (dd, *J* = 17.5, 4.2 Hz, 1H); <sup>13</sup>C NMR (75.5 MHz, CDCl<sub>3</sub>)  $\delta$  193.2 (C), 150.7 (C), 140.4 (C), 131.9 (2CH), 129.3 (2CH), 128.9 (CH), 128.3 (2CH), 125.1 (q, *J*<sub>C-F</sub> = 281.3 Hz, CF<sub>3</sub>), 124.1 (2CH), 121.7 (C), 84.8 (C), 81.1 (C), 38.9 (CH<sub>2</sub>), 33.7 (q, *J*<sub>C-F</sub> = 31.9 Hz, CH); <sup>19</sup>F NMR (282 MHz, CDCl<sub>3</sub>)  $\delta$  -71.6 (s, 3F); HRMS (ESI) *m/z*: 348.0851 (M+H)<sup>+</sup>, C<sub>18</sub>H<sub>13</sub>F<sub>3</sub>NO<sub>3</sub> requires 348.0848.

**(S)-(-)-3-(Trifluoromethyl)-1-(naphthalene-3-yl)-5-phenylpent-4-yn-1-one (3af)**

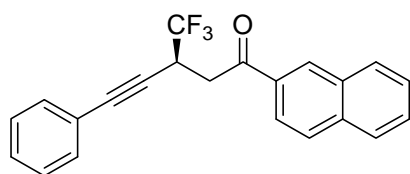

Purified by flash chromatography eluting with hexane-diethyl ether (99:01). Enantiomeric excess (84%) was determined by chiral HPLC (Chiralcel OD-H), hexane-*i*PrOH 99:01, 1 mL/min, major enantiomer  $t_r$  = 16.3 min, minor enantiomer  $t_r$  = 19.1

min.

$[\alpha]_D^{20}$  -118.6 (*c* 1.30, CHCl<sub>3</sub>, 84% *ee*); <sup>1</sup>H NMR (300 MHz, CDCl<sub>3</sub>)  $\delta$  8.50 (s, 1H), 8.05 (dd, *J* = 8.6, 1.8 Hz, 1H), 7.98 (d, *J* = 7.9 Hz, 1H), 7.90 (dd, *J* = 10.2, 8.6 Hz, 2H), 7.65-7.54 (m, 2H), 7.38-7.35 (m, 2H), 7.28-7.20 (m, 3H), 4.35-4.22 (m, 1H), 3.73 (dd, *J* =

17.2, 8.9 Hz, 1H), 3.54 (dd,  $J = 17.2, 4.1$  Hz, 1H);  $^{13}\text{C}$  NMR (75.5 MHz,  $\text{CDCl}_3$ )  $\delta$  194.4 (CH), 135.9 (C), 133.5 (C), 132.4 (C), 131.8 (2CH), 130.12 (CH), 129.64 (CH), 128.9 (CH), 128.7 (CH), 128.6 (CH), 128.2 (2CH), 127.8 (CH), 127.0 (CH), 125.4 (q,  $J_{\text{C-F}} = 279.4$  Hz,  $\text{CF}_3$ ), 123.7 (CH), 122.0 (C), 84.4 (C), 81.9 (q,  $J_{\text{C-F}} = 3.5$  Hz, C), 38.3 (CH<sub>2</sub>), 33.8 (q,  $J_{\text{C-F}} = 31.8$  Hz, CH);  $^{19}\text{F}$  NMR (282 MHz,  $\text{CDCl}_3$ )  $\delta$  -71.5 (s, 3F); HRMS (ESI)  $m/z$ : 353.1148 ( $\text{M} + \text{H}$ )<sup>+</sup>,  $\text{C}_{22}\text{H}_{16}\text{F}_3\text{O}$  requires 353.1148.

**(S)-(-)-3-(Trifluoromethyl)-5-phenyl-1-(thiophen-2-yl)pent-4-yn-1-one (3ag)**

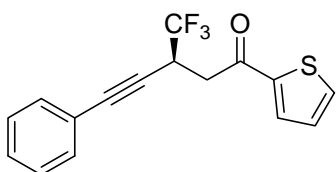

Purified by flash chromatography eluting with hexane-diethyl ether (99:01). Enantiomeric excess (90%) was determined by chiral HPLC (Chiralcel OD-H), hexane-*i*PrOH 99:01, 1 mL/min, major enantiomer  $t_r = 10.5$  min, minor enantiomer  $t_r = 15.2$  min.

$[\alpha]_D^{20} -6.1$  ( $c$  1.09,  $\text{CHCl}_3$ , 90% *ee*);  $^1\text{H}$  NMR (300 MHz,  $\text{CDCl}_3$ )  $\delta$  7.77 (dd,  $J = 3.8, 1.1$  Hz, 1H), 7.68 (dd,  $J = 5, 1.1$  Hz, 1H), 7.36-7.33 (m, 2H), 7.28-7.22 (m, 3H), 7.14 (dd,  $J = 5, 3.8$  Hz, 1H), 4.23-4.10 (m, 1H), 3.47 (dd,  $J = 16.6, 8.9$  Hz, 1H), 3.32 (dd,  $J = 16.6, 4.5$  Hz, 1H);  $^{13}\text{C}$  NMR (75.5 MHz,  $\text{CDCl}_3$ )  $\delta$  187.4 (C), 143.2 (C), 134.7 (CH), 132.7 (CH), 131.9 (2CH), 128.7 (CH), 128.3 (CH), 128.2 (2CH), 125.2 (q,  $J_{\text{C-F}} = 278.7$  Hz,  $\text{CF}_3$ ), 121.9 (C), 84.7 (C), 81.5 (C), 38.7 (CH<sub>2</sub>), 33.8 (q,  $J_{\text{C-F}} = 31.7$  Hz, CH);  $^{19}\text{F}$  NMR (282 MHz,  $\text{CDCl}_3$ )  $\delta$  -71.7 (s, 3F); HRMS (ESI)  $m/z$ : 309.0550 ( $\text{M} + \text{H}$ )<sup>+</sup>,  $\text{C}_{16}\text{H}_{12}\text{F}_3\text{OS}$  requires 309.0555.

**(S)-(-)-3-(Trifluoromethyl)-5-(4-methoxyphenyl)-1-phenylpent-4-yn-1-one (3ba)**

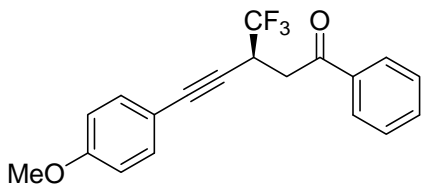

Purified by flash chromatography eluting with hexane-diethyl ether (99:01). Enantiomeric excess (83%) was determined by chiral HPLC (Chiralpak AD-H), hexane-*i*PrOH 99:01, 1 mL/min, major enantiomer  $t_r = 15.9$  min, minor enantiomer  $t_r = 14.4$

min.

$[\alpha]_D^{20} -20.3$  ( $c$  0.93,  $\text{CHCl}_3$ , 83% *ee*);  $^1\text{H}$  NMR (300 MHz,  $\text{CDCl}_3$ )  $\delta$  8.02-7.99 (m, 2H), 7.64-7.59 (m, 1H), 7.53-7.47 (m, 2H), 7.31 (dt,  $J = 9, 3$  Hz, 2H), 6.79 (dt,  $J = 9, 3$  Hz, 2H), 4.27-4.14 (m, 1H), 3.79 (s, 3H), 3.58 (dd,  $J = 17.2, 8.9$  Hz, 1H), 3.41 (dd,  $J = 17.2, 4.2$  Hz, 1H);  $^{13}\text{C}$  NMR (75.5 MHz,  $\text{CDCl}_3$ )  $\delta$  194.7 (C), 159.8 (C), 136.1 (C), 133.7 (CH), 133.3 (2CH), 128.8 (2CH), 128.2 (2CH), 125.4 (q,  $J_{\text{C-F}} = 279.1$  Hz,  $\text{CF}_3$ ), 114.1 (C), 113.8 (2CH), 84.2 (C), 80.4 (q,  $J_{\text{C-F}} = 3.5$  Hz, C), 55.3 (CH<sub>3</sub>), 38.3 (CH<sub>2</sub>), 33.7 (q,  $J_{\text{C-F}} = 31.7$  Hz, CH);  $^{19}\text{F}$  NMR (282 MHz,  $\text{CDCl}_3$ )  $\delta$  -71.7 (s, 3F); HRMS (ESI)  $m/z$ : 333.1088 ( $\text{M} + \text{H}$ )<sup>+</sup>,  $\text{C}_{19}\text{H}_{16}\text{F}_3\text{O}_2$  requires 333.1097.

**(S)-(-)-3-(Trifluoromethyl)-5-(4-fluorophenyl)-1-phenylpent-4-yn-1-one (3ca)**

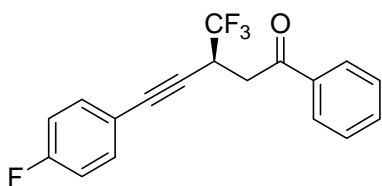

Purified by flash chromatography eluting with hexane-diethyl ether (99:01). Enantiomeric excess (80%) was determined by chiral HPLC (Chiralcel OD-H), hexane-*i*PrOH 99:01, 1 mL/min, major enantiomer  $t_r$  = 8.8 min, minor enantiomer  $t_r$  = 10.8 min.

$[\alpha]_D^{20}$  -15.7 (*c* 1.15, CHCl<sub>3</sub>, 80% *ee*); <sup>1</sup>H NMR (300 MHz, CDCl<sub>3</sub>)  $\delta$  8.02-7.99 (m, 2H), 7.65-7.60 (m, 1H), 7.53-7.48 (m, 2H), 7.39-7.34 (m, 2H), 7.00-6.93 (m, 2H), 4.24-4.17 (m, 1H), 3.59 (dd, *J* = 17.3, 9 Hz, 1H), 3.42 (dd, *J* = 17.3, 4.1 Hz, 1H); <sup>13</sup>C NMR (75.5 MHz, CDCl<sub>3</sub>)  $\delta$  194.5 (C), 162.7 (d, *J* = 249.9 Hz, C), 136.0 (C), 133.9 (CH), 133.8 (d, *J* = 8.5 Hz, 2CH), 128.8 (2CH), 128.2 (2CH), 125.3 (q, *J* = 279.2 Hz, CF<sub>3</sub>), 118.1 (d, *J* = 3.5 Hz, C), 115.5 (d, *J*<sub>C-F</sub> = 22.1 Hz, 2CH), 83.3 (C), 81.6 (q, *J*<sub>C-F</sub> = 5.1 Hz, C), 38.2 (CH<sub>2</sub>), 33.6 (q, *J*<sub>C-F</sub> = 31.6 Hz, CH); <sup>19</sup>F NMR (282 MHz, CDCl<sub>3</sub>)  $\delta$  -71.6 (s, 3F), -110.7 (s, 1F); HRMS (ESI) *m/z*: 321.0892 (M + H)<sup>+</sup>, C<sub>18</sub>H<sub>13</sub>F<sub>4</sub>O requires 321.0897.

**(S)-(-)-5-(4-Chlorophenyl)-3-(trifluoromethyl)-1-phenylpent-4-yn-1-one (3da)**

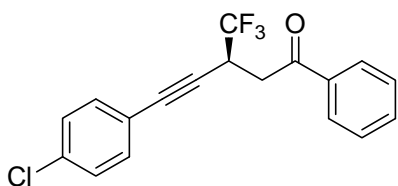

Purified by flash chromatography eluting with hexane-diethyl ether (99:01). Enantiomeric excess (77%) was determined by chiral HPLC (Chiralcel OD-H), hexane-*i*PrOH 99:01, 1 mL/min, major enantiomer  $t_r$  = 10.5 min, minor enantiomer  $t_r$  = 11.5 min.

$[\alpha]_D^{20}$  -20.4 (*c* 0.90, CHCl<sub>3</sub>, 77% *ee*); <sup>1</sup>H NMR (300 MHz, CDCl<sub>3</sub>)  $\delta$  8.02-7.99 (m, 2H), 7.62 (ddd, *J* = 6.6, 3.9, 1.3 Hz, 1H), 7.54-7.48 (m, 2H), 7.33-7.22 (m, 4H), 4.26-4.15 (m, 1H), 3.59 (dd, *J* = 17.3, 9 Hz, 1H), 3.42 (dd, *J* = 17.3, 4.1 Hz, 1H); <sup>13</sup>C NMR (75.5 MHz, CDCl<sub>3</sub>)  $\delta$  194.4 (C), 136.0 (C), 134.7 (C), 133.8 (CH), 133.1 (2CH), 128.8 (2CH), 128.6 (2CH), 128.2 (2CH), 125.3 (q, *J*<sub>C-F</sub> = 279.4 Hz, CF<sub>3</sub>), 120.5 (C), 83.2 (C), 80.9 (C), 38.2 (CH<sub>2</sub>), 33.7 (q, *J*<sub>C-F</sub> = 31.7 Hz, CH); <sup>19</sup>F NMR (282 MHz, CDCl<sub>3</sub>)  $\delta$  -71.5 (s, 3F); HRMS (ESI) *m/z*: 337.0594 / 339.0553 (M + H)<sup>+</sup> 100 / 28.9 C<sub>18</sub>H<sub>13</sub>ClF<sub>3</sub>O requires 337.0607 / 339.0578.

**(S)-(-)-3-(Trifluoromethyl)-5-(4-methoxyphenyl)-1-(thiophen-2-yl)pent-4-yn-1-one (3bg)**

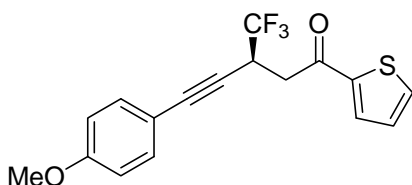

Purified by flash chromatography eluting with hexane-diethyl ether (99:01). Enantiomeric excess (93%) was determined by chiral HPLC (Chiralpak AY-H), hexane-*i*PrOH 99:01, 1 mL/min, major enantiomer  $t_r$  = 25.3 min, minor enantiomer  $t_r$  = 16.8 min.

$[\alpha]_D^{20}$  -7.3 (*c* 0.98, CHCl<sub>3</sub>, 93% *ee*); <sup>1</sup>H NMR (300 MHz, CDCl<sub>3</sub>)  $\delta$  7.79 (dd, *J* = 3.8, 1.1 Hz, 1H), 7.72-7.70 (m, 1H), 7.32-7.28 (m, 2H), 7.17 (dd, *J* = 5, 3.8 Hz, 1H), 6.81-

6.77 (m, 2H), 4.23-4.11 (m, 1H), 3.79 (s, 3H), 3.48 (dd,  $J = 16.6, 8.9$  Hz, 1H), 3.33 (dd,  $J = 16.6, 4.5$  Hz, 1H);  $^{13}\text{C}$  NMR (75.5 MHz,  $\text{CDCl}_3$ )  $\delta$  187.5 (C), 159.8 (C), 143.3 (C), 134.7 (CH), 133.3 (2CH), 132.6 (CH), 128.3 (CH), 125.2 (q,  $J_{\text{C-F}} = 279.3$  Hz,  $\text{CF}_3$ ), 114.0 (C), 113.8 (2CH), 84.6 (C), 80.0 (q,  $J_{\text{C-F}} = 3.3$  Hz, C), 55.3 ( $\text{CH}_3$ ), 38.8 ( $\text{CH}_2$ ), 33.8 (q,  $J_{\text{C-F}} = 31.7$  Hz, CH);  $^{19}\text{F}$  NMR (282 MHz,  $\text{CDCl}_3$ )  $\delta$  -71.8 (s, 3F); HRMS (ESI)  $m/z$ : 338.0592 ( $\text{M} + \text{H}$ ) $^+$   $\text{C}_{17}\text{H}_{14}\text{F}_3\text{O}_2\text{S}$  requires 338.0588.

**(S)-(-)-3-(Trifluoromethyl)-5-(4-fluorophenyl)-1-(thiophen-2-yl)pent-4-yn-1-one (3cg)**

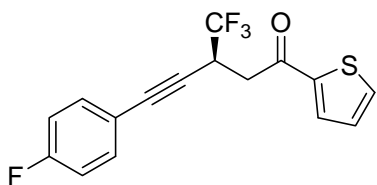

Purified by flash chromatography eluting with hexane-diethyl ether (99:01). Enantiomeric excess (90%) was determined by chiral HPLC (Chiralcel OD-H), hexane- $i$ -PrOH 99:01, 1 mL/min, major enantiomer  $t_r = 12.6$  min, minor enantiomer  $t_r = 14.9$  min.

$[\alpha]_D^{20}$  -6.4 ( $c$  1.03,  $\text{CHCl}_3$ , 90%  $ee$ );  $^1\text{H}$  NMR (300 MHz,  $\text{CDCl}_3$ )  $\delta$  7.79 (dd,  $J = 3.9, 1.1$  Hz, 1H), 7.72 (dd,  $J = 5, 1.1$  Hz, 1H), 7.38-7.32 (m, 2H), 7.18 (dd,  $J = 5, 3.9$  Hz, 1H), 7.00-6.93 (m, 2H), 4.23-4.08 (m, 1H), 3.49 (dd,  $J = 16.7, 9$  Hz, 1H), 3.35 (dd,  $J = 16.7, 4.4$  Hz, 1H);  $^{13}\text{C}$  NMR (75.5 MHz,  $\text{CDCl}_3$ )  $\delta$  187.3 (C), 162.7 (d,  $J = 250$  Hz, C), 143.2 (C), 134.8 (CH), 133.8 (d,  $J = 8.5$  Hz, 2CH), 132.7 (CH), 128.3 (CH), 125.0 (q,  $J_{\text{C-F}} = 279.5$  Hz,  $\text{CF}_3$ ), 118.0 (C), 115.5 (d,  $J = 22.1$  Hz, 2CH), 83.6 (C), 81.2 (q,  $J_{\text{C-F}} = 3.6$  Hz, C), 38.7 ( $\text{CH}_2$ ), 33.8 (q,  $J_{\text{C-F}} = 31.9$  Hz, CH);  $^{19}\text{F}$  NMR (282 MHz,  $\text{CDCl}_3$ )  $\delta$  -71.6 (s, 3F), -110.7 (s, 1F); HRMS (ESI)  $m/z$ : 327.0455 ( $\text{M} + \text{H}$ ) $^+$   $\text{C}_{16}\text{H}_{11}\text{F}_4\text{OS}$  requires 327.0461.

**(S)-(-)-5-(4-Chlorophenyl)-3-(trifluoromethyl)-1-(thiophen-2-yl)pent-4-yn-1-one (3dg)**

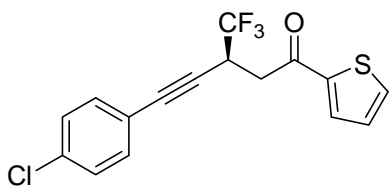

Purified by flash chromatography eluting with hexane-diethyl ether (99:01). Enantiomeric excess (84%) was determined by chiral HPLC (Chiralpak IC), hexane- $i$ -PrOH 99:01, 1 mL/min, major enantiomer  $t_r = 6.5$  min, minor enantiomer  $t_r = 7.0$  min.

$[\alpha]_D^{20}$  -6.9 ( $c$  1.06,  $\text{CHCl}_3$ , 84%  $ee$ );  $^1\text{H}$  NMR (300 MHz,  $\text{CDCl}_3$ )  $\delta$  7.79 (dd,  $J = 3.9, 1.0$  Hz, 1H), 7.22 (dd,  $J = 4.9, 1.0$  Hz, 1H), 7.31-7.23 (m, 4H), 7.18 (dd,  $J = 4.9, 3.9$  Hz, 1H), 4.21-4.14 (m, 1H), 3.49 (dd,  $J = 16.7, 9.0$  Hz, 1H), 3.35 (dd,  $J = 16.7, 4.4$  Hz, 1H);  $^{13}\text{C}$  NMR (75.5 MHz,  $\text{CDCl}_3$ )  $\delta$  187.3 (C), 143.1 (C), 134.8 (C), 134.8 (CH), 133.1 (2CH), 132.6 (CH), 128.6 (2CH), 128.4 (CH), 125.1 (q,  $J_{\text{C-F}} = 279.6$  Hz,  $\text{CF}_3$ ), 120.4 (C), 83.6 (C), 82.5 (C), 38.6 ( $\text{CH}_2$ ), 33.9 (q,  $J_{\text{C-F}} = 31.9$  Hz, CH);  $^{19}\text{F}$  NMR (282 MHz,  $\text{CDCl}_3$ )  $\delta$  -71.5 (s, 3F); HRMS (ESI)  $m/z$ : 343.0158 / 345.0128 ( $\text{M} + \text{H}$ ) $^+$  100 / 36.7  $\text{C}_{16}\text{H}_{11}\text{ClF}_3\text{OS}$  requires 343.0171 / 345.0142.

**(S)-(-)-3-(Trifluoromethyl)-5-(2-methoxyphenyl)-1-(thiophen-2-yl)pent-4-yn-1-one (3eg)**

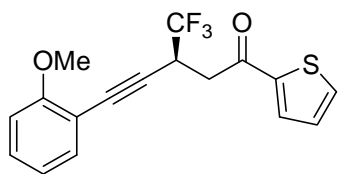

Purified by flash chromatography eluting with hexane-diethyl ether (99:01). Enantiomeric excess (98%) was determined by chiral HPLC (Chiralcel OD-H), hexane-*i*PrOH 95:05, 1 mL/min, major enantiomer  $t_r$  = 10.7 min, minor enantiomer  $t_r$  = 13.2 min.

$[\alpha]_D^{20}$  -7.8 (*c* 0.90, CHCl<sub>3</sub>, 98% *ee*); <sup>1</sup>H NMR (300 MHz, CDCl<sub>3</sub>)  $\delta$  7.80 (dd, *J* = 3.9, 1.1 Hz, 1H), 7.70 (dd, *J* = 5.0, 1.1 Hz, 1H), 7.34-7.24 (m, 2H), 7.17 (dd, *J* = 4.9, 3.8 Hz, 1H), 6.91-6.77 (m, 2H), 4.29-4.21 (m, 1H), 3.78 (s, 3H), 3.52 (dd, *J* = 16.6, 8.5 Hz, 1H), 3.36 (dd, *J* = 16.6, 4.8 Hz, 1H); <sup>13</sup>C NMR (75.5 MHz, CDCl<sub>3</sub>)  $\delta$  187.5 (C), 160.4 (C), 143.4 (C), 134.5 (CH), 133.7 (CH), 132.6 (CH), 130.1 (CH), 128.3 (CH), 125.2 (q, *J*<sub>C-F</sub> = 279.5 Hz, CF<sub>3</sub>), 120.3 (CH), 111.3 (C), 110.8 (CH), 85.5 (C), 81.1 (C), 55.7 (CH<sub>3</sub>), 38.9 (CH<sub>2</sub>), 34.1 (q, *J*<sub>C-F</sub> = 31.8 Hz, CH); <sup>19</sup>F NMR (282 MHz, CDCl<sub>3</sub>)  $\delta$  -71.6 (s, 3F); HRMS (ESI) *m/z*: 338.0590 (M + H)<sup>+</sup> C<sub>17</sub>H<sub>14</sub>F<sub>3</sub>O<sub>2</sub>S requires 338.0588.

**(S)-(-)-3-(Trifluoromethyl)-5-(3-fluorophenyl)-1-(thiophen-2-yl)pent-4-yn-1-one (3fg)**

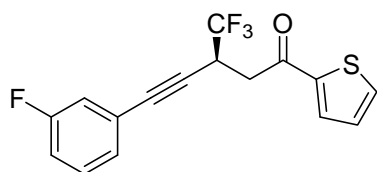

Purified by flash chromatography eluting with hexane-diethyl ether (99:01). Enantiomeric excess (99%) was determined by chiral HPLC (Chiralcel OD-H), hexane-*i*PrOH 99:01, 1 mL/min, major enantiomer  $t_r$  = 13.7 min, minor enantiomer  $t_r$  = 10.9 min.

$[\alpha]_D^{20}$  -8.3 (*c* 0.87, CHCl<sub>3</sub>, 99% *ee*); <sup>1</sup>H NMR (300 MHz, CDCl<sub>3</sub>)  $\delta$  7.79 (dd, *J* = 2.7, 1.3 Hz, 1H), 7.74 (ddd, *J* = 9.7, 4.9, 1.1 Hz, 1H), 7.28-7.14 (m, 3H), 7.08-6.98 (m, 2H), 4.25-4.13 (m, 1H), 3.50 (dd, *J* = 16.7, 9.0 Hz, 1H), 3.36 (dd, *J* = 16.7, 4.4 Hz, 1H); <sup>13</sup>C NMR (75.5 MHz, CDCl<sub>3</sub>)  $\delta$  187.2 (C), 162.2 (d, *J*<sub>C-F</sub> = 246.7 Hz, C), 143.1 (C), 134.8 (CH), 132.7 (CH), 129.8 (d, *J*<sub>C-F</sub> = 8.6 Hz, CH), 128.4 (CH), 127.8 (d, *J*<sub>C-F</sub> = 3.1 Hz, CH), 125.1 (q, *J*<sub>C-F</sub> = 279.4 Hz, CF<sub>3</sub>), 123.7 (d, *J*<sub>C-F</sub> = 9.4 Hz, C), 118.7 (d, *J*<sub>C-F</sub> = 23.0 Hz, CH), 116.1 (d, *J* = 21.2 Hz, CH), 83.4 (q, *J*<sub>C-F</sub> = 3.4 Hz, C), 82.5 (d, *J*<sub>C-F</sub> = 3.5 Hz, C), 38.6 (CH<sub>2</sub>), 33.8 (q, *J*<sub>C-F</sub> = 31.9 Hz, CH); <sup>19</sup>F NMR (282 MHz, CDCl<sub>3</sub>)  $\delta$  -71.6 (s, 3F), -113.4 (s, 1F); HRMS (ESI) *m/z*: 327.0457 (M + H)<sup>+</sup> C<sub>16</sub>H<sub>11</sub>F<sub>4</sub>OS requires 327.0461.

**(S)-(-)-3-(trifluoromethyl)-5-(3,5-dimethoxyphenyl)-1-(thiophen-2-yl)pent-4-yn-1-one (3gg)**

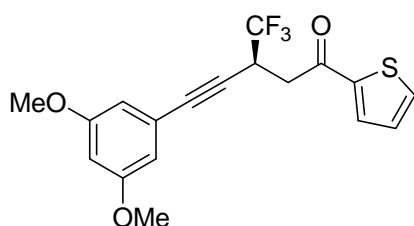

Purified by flash chromatography eluting with hexane-diethyl ether (95:05). Enantiomeric excess (86%) was determined by chiral HPLC (Chiralpak AD-H), hexane-*i*PrOH 95:05, 1 mL/min, major

enantiomer  $t_r = 11.2$  min, minor enantiomer  $t_r = 12.5$  min.

$[\alpha]_D^{20} -7.0$  ( $c$  0.93,  $\text{CHCl}_3$ , 86%  $ee$ );  $^1\text{H}$  NMR (300 MHz,  $\text{CDCl}_3$ )  $\delta$  7.80 (dd,  $J = 3.8$ , 1.1 Hz, 1H), 7.71 (dd,  $J = 4.9$ , 1.1 Hz, 1H), 7.17 (dd,  $J = 4.9$ , 3.8 Hz, 1H), 6.51 (d,  $J = 2.3$  Hz, 2H), 6.42 (t,  $J = 2.3$  Hz, 1H), 4.22-4.15 (m, 1H), 3.75 (s, 6H), 3.49 (dd,  $J = 16.6$ , 8.9 Hz, 1H), 3.35 (dd,  $J = 16.6$ , 4.5 Hz, 1H);  $^{13}\text{C}$  NMR (75.5 MHz,  $\text{CDCl}_3$ )  $\delta$  187.4 (C), 160.4 (2C), 143.2 (C), 134.7 (CH), 132.7 (CH), 130.7 (CH), 125.2 (q,  $J_{\text{C-F}} = 279.3$  Hz,  $\text{CF}_3$ ), 123.2 (C), 109.6 (2CH), 102.3 (CH), 84.7 (C), 80.0 (q,  $J_{\text{C-F}} = 3.4$  Hz, C), 55.4 (2CH<sub>3</sub>), 38.7 (CH<sub>2</sub>), 33.8 (q,  $J_{\text{C-F}} = 31.8$  Hz, CH);  $^{19}\text{F}$  NMR (282 MHz,  $\text{CDCl}_3$ )  $\delta$  -71.6 (s, 3F); HRMS (ESI)  $m/z$ : 368.0690 ( $\text{M} + \text{H}$ )<sup>+</sup>  $\text{C}_{18}\text{H}_{15}\text{F}_3\text{O}_3\text{S}$  requires 368.0694.

**(S)-(-)-3-(Trifluoromethyl)-1-(thiophen-2-yl)-5-(thiophen-3-yl)pent-4-yn-1-one (3hg)**

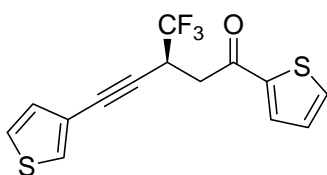

Purified by flash chromatography eluting with hexane-diethyl ether (99:01). Enantiomeric excess (88%) was determined by chiral HPLC (Chiralcel OD-H), hexane-*i*-PrOH 99:01, 1 mL/min, major enantiomer  $t_r = 11.1$  min, minor enantiomer  $t_r = 15.5$  min.

$[\alpha]_D^{20} -5.4$  ( $c$  0.86,  $\text{CHCl}_3$ , 88%  $ee$ );  $^1\text{H}$  NMR (300 MHz,  $\text{CDCl}_3$ )  $\delta$  7.79 (dd,  $J = 3.9$ , 1.1 Hz, 1H), 7.71 (dd,  $J = 4.9$ , 1.1 Hz, 1H), 7.40 (dd,  $J = 3.0$ , 1.2 Hz, 1H), 7.22 (dd,  $J = 5.0$ , 3.0 Hz, 1H), 7.17 (dd,  $J = 5.0$ , 3.9 Hz, 1H), 7.04 (dd,  $J = 5.0$ , 1.2 Hz, 1H), 4.22-4.11 (m, 1H), 3.49 (dd,  $J = 16.7$ , 8.9 Hz, 1H), 3.34 (dd,  $J = 16.7$ , 4.4 Hz, 1H);  $^{13}\text{C}$  NMR (75.5 MHz,  $\text{CDCl}_3$ )  $\delta$  187.3 (C), 143.2 (C), 134.7 (CH), 132.6 (CH), 129.9 (CH), 129.7 (CH), 128.3 (CH), 125.3 (CH), 125.1 (q,  $J_{\text{C-F}} = 279.5$  Hz,  $\text{CF}_3$ ), 120.9 (C), 81.1 (q,  $J_{\text{C-F}} = 3.5$  Hz, C), 79.9 (C), 38.7 (CH<sub>2</sub>), 33.8 (q,  $J_{\text{C-F}} = 31.7$  Hz, CH);  $^{19}\text{F}$  NMR (282 MHz,  $\text{CDCl}_3$ )  $\delta$  -71.6 (s, 3F); HRMS (ESI)  $m/z$ : 314.0043 ( $\text{M} + \text{H}$ )<sup>+</sup>  $\text{C}_{14}\text{H}_9\text{F}_3\text{OS}_2$  requires 314.0047.

**(S)-(+)-7-phenyl-1-(thiophen-2-yl)-3-(trifluoromethyl)hept-4-yn-1-one (3ig)**

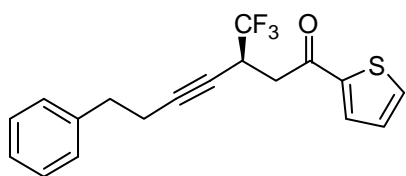

Purification by flash chromatography eluting with hexane-diethyl ether (99:01). Enantiomeric excess (92%) was determined by chiral HPLC (Chiralcel AD-H), hexane-*i*-PrOH 99:01, 1 mL/min, major enantiomer  $t_r = 9.7$  min, minor enantiomer  $t_r = 10.8$  min.

$[\alpha]_D^{20} +1.2$  ( $c$  0.73,  $\text{CHCl}_3$ , 92%  $ee$ );  $^1\text{H}$  NMR (300 MHz,  $\text{CDCl}_3$ )  $\delta$  7.71 (td,  $J = 4.7$ , 1.2 Hz, 2H), 7.26-7.12 (m, 6H), 4.05 (m, 1H), 3.31 (dd,  $J = 16.6$ , 9.0 Hz, 1H), 3.19 (dd,  $J = 16.6$ , 4.5 Hz, 1H), 2.74 (t,  $J = 7.2$  Hz, 2H), 2.42 (td,  $J = 7.5$ , 2.4 Hz, 2H);  $^{13}\text{C}$  NMR (75.5 MHz,  $\text{CDCl}_3$ )  $\delta$  187.6 (C), 143.4 (C), 140.3 (C), 134.5 (CH), 132.5 (CH), 128.5 (2CH), 128.3 (3CH), 126.2 (CH), 125.5 (q,  $J_{\text{C-F}} = 277.5$  Hz,  $\text{CF}_3$ ), 84.6 (C), 73.3 (C), 38.9 (CH<sub>2</sub>), 34.6 (CH<sub>2</sub>), 33.3 (q,  $J_{\text{C-F}} = 30.8$  Hz, CH), 20.8 (CH<sub>2</sub>);  $^{19}\text{F}$  NMR (282 MHz,  $\text{CDCl}_3$ )  $\delta$  -72.1 (s, 3F); HRMS (ESI)  $m/z$ : 337.0854 ( $\text{M} + \text{H}$ )<sup>+</sup>  $\text{C}_{18}\text{H}_{16}\text{F}_3\text{OS}$  requires 337.0868.

**(S)-(+)-5-(Trifluoromethyl)-1,7-diphenylhept-6-yn-3-one (3ah)**

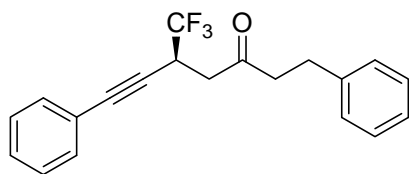

Purification by flash chromatography eluting with hexane-diethyl ether (99:01). Enantiomeric excess (79%) was determined by chiral HPLC (Chiralcel AD-H), hexane-*i*PrOH 99:01, 1 mL/min, major enantiomer  $t_r$  = 6.6 min, minor enantiomer  $t_r$  = 9.6

min.

$[\alpha]_D^{20}$  +6.1 ( $c$  0.8, CHCl<sub>3</sub>, 79% *ee*); <sup>1</sup>H NMR (300 MHz, CDCl<sub>3</sub>)  $\delta$  7.42-7.36 (m, 2H), 7.35-7.22 (m, 5H), 7.24-7.14 (m, 2H), 3.99 (m, 1H), 3.01-2.78 (m, 6H); <sup>13</sup>C NMR (75.5 MHz, CDCl<sub>3</sub>)  $\delta$  204.3 (C), 140.4 (C), 131.9 (CH), 128.7 (CH), 128.6 (CH), 128.3 (CH), 126.3 (CH), 125.1 (q,  $J_{C-F}$  = 277.1 Hz, CF<sub>3</sub>), 121.9 (C), 84.4 (C), 81.5 (q,  $J_{C-F}$  = 3.6 Hz, C), 44.7 (CH<sub>2</sub>), 42.1 (CH<sub>2</sub>), 33.4 (q,  $J_{C-F}$  = 31.7 Hz, CH), 29.5 (CH<sub>2</sub>); <sup>19</sup>F NMR (282 MHz, CDCl<sub>3</sub>)  $\delta$  -71.8 (s, 3F); HRMS (ESI)  $m/z$ : 331.1306 (M + H)<sup>+</sup> C<sub>20</sub>H<sub>18</sub>F<sub>3</sub>O requires 331.1304.

**(S)-(+)-5-(Trifluoromethyl)-7-(4-methoxyphenyl)-1-phenylhept-6-yn-3-one (3bh)**

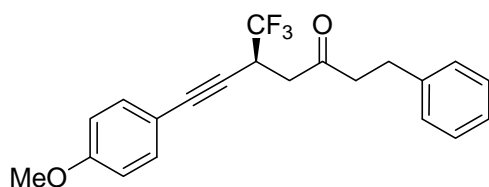

Purification by flash chromatography eluting with hexane-diethyl ether (99:01). Enantiomeric excess (82%) was determined by chiral HPLC (Chiralcel AD-H), hexane-*i*PrOH 99:01, 1 mL/min, major enantiomer  $t_r$  = 11.3 min, minor

enantiomer  $t_r$  = 17.4 min.

$[\alpha]_D^{20}$  +3.0 ( $c$  0.5, CHCl<sub>3</sub>, 82% *ee*); <sup>1</sup>H NMR (300 MHz, CDCl<sub>3</sub>)  $\delta$  7.33 (d,  $J$  = 9.0 Hz, 2H), 7.31-7.12 (m, 6H), 6.82 (d,  $J$  = 9.0 Hz, 2H), 3.98 (m, 1H), 3.81 (s, 3H), 3.00-2.78 (m, 6H); <sup>13</sup>C NMR (75.5 MHz, CDCl<sub>3</sub>)  $\delta$  204.4 (C), 159.9 (C), 140.5 (C), 140.5 (CH), 133.4 (CH), 128.6 (CH), 128.3 (CH), 126.3 (CH), 125.2 (q,  $J_{C-F}$  = 278.3 Hz, CF<sub>3</sub>), 114.0 (C), 113.9 (CH), 84.3 (C), 80.1 (q,  $J_{C-F}$  = 1.6 Hz, C), 55.3 (CH<sub>3</sub>), 44.8 (CH<sub>2</sub>), 42.1 (CH<sub>2</sub>), 33.4 (q,  $J_{C-F}$  = 31.5 Hz, CH), 29.5 (CH<sub>2</sub>); <sup>19</sup>F NMR (282 MHz, CDCl<sub>3</sub>)  $\delta$  -71.9 (s, 3F); HRMS (ESI)  $m/z$ : 361.1415 (M + H)<sup>+</sup> C<sub>21</sub>H<sub>20</sub>F<sub>3</sub>O<sub>2</sub> requires 361.1410.

## Determination of the absolute configuration of (S)-(-)-3aa

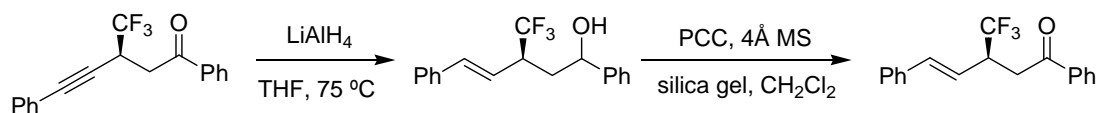

### (*E,S*)-3-(Trifluoromethyl)-1,5-diphenylpent-4-en-1-ol (**4**)

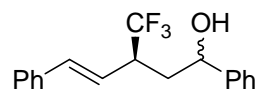

Lithium aluminium hydride (12.1 mg, 0.320 mmol) was added to a solution of **3aa** (16.1 mg, 0.053 mmol, 80% *ee*) in dry THF (1.5 mL) at room temperature, and the solution was stirred overnight at 75 °C. The reaction mixture was quenched with 20 % aqueous  $\text{NH}_4\text{Cl}$  (1.0 mL), extracted with  $\text{CH}_2\text{Cl}_2$  (2 x 15 mL), washed with brine (15 mL), dried over  $\text{MgSO}_4$  and concentrated under reduced pressure. Purification by flash chromatography on silica gel eluting with hexane:EtOAc (98:02) afforded compound **4** (16.2 mg, 99%) as a mixture of diastereomers.

### (*E,S*)-3-(Trifluoromethyl)-1,5-diphenylpent-4-en-1-one (**5**)<sup>2,3</sup>

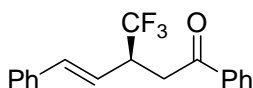

To a 25 mL round-bottom flask equipped with a magnetic stirring bar was added PCC (137 mg, 0.64 mmol), 4 Å MS (300 mg), silica gel (300 mg) and  $\text{CH}_2\text{Cl}_2$  (10 mL). The mixture was cooled to 0 °C and the mixture of alcohols **4** (16.2 mg, 0.05 mmol) in  $\text{CH}_2\text{Cl}_2$  (1 mL) was added dropwise. The reaction was warmed up to room temperature and was stirred for 3 h. The mixture was filtered through a pad of silica gel eluting with  $\text{CH}_2\text{Cl}_2$ . The solvent was removed under reduced pressure. The residual crude product was purified by flash column chromatography eluting with hexane:Et<sub>2</sub>O (99:01) to afford the ketone **5** (10.5 mg, 66%).

Enantiomeric excess (78%) was determined by chiral HPLC (Chiralpak AD-H), hexane-*i*PrOH 99:01, 1 mL/min, major enantiomer  $t_r$  = 9.6 min, minor enantiomer  $t_r$  = 10.8 min. (lit<sup>2,3</sup>, Chiralpak AD-H, hexane-*i*PrOH 99.6:0.4, flow = 0.7 mL/min, *R*-enantiomer  $t_r$  = 19.3 min, *S*-enantiomer  $t_r$  = 16.3 min);  $[\alpha]_D^{20}$  +4.9 (*c* 0.57,  $\text{CCl}_4$ , 78% *ee*) {lit<sup>2,3</sup>  $[\alpha]_D^{20}$  – 16.5 (0.95,  $\text{CCl}_4$ , 40% *ee*) for the *R*-isomer}; <sup>1</sup>H NMR (300 MHz,  $\text{CDCl}_3$ )  $\delta$  7.98-7.95 (m, 2H), 7.62-7.57 (m, 1H), 7.51-7.46 (m, 2H), 7.37-7.24 (m, 5H), 6.70 (d, *J* = 15.9 Hz, 1H), 6.04 (dd, *J* = 15.9, 8.6 Hz, 1H), 3.93-3.83 (m, 1H), 3.40-3.38 (m, 2H); <sup>13</sup>C NMR (75.5 MHz,  $\text{CDCl}_3$ )  $\delta$  195.4 (C), 136.4 (C), 136.3 (CH), 136.1 (C), 133.6 (CH), 128.8 (2CH), 128.5 (2CH), 128.1 (CH), 128.1 (2CH), 126.9 (q, *J* = 274.7 Hz,  $\text{CF}_3$ ), 121.5 (q, *J* = 2.4 Hz, CH), 42.6 (q, *J* = 27.7 Hz, CH), 37.4 (s,  $\text{CH}_2$ ); <sup>19</sup>F NMR (282 MHz,  $\text{CDCl}_3$ )  $\delta$  –71.2 (s, 3F); HRMS (ESI) *m/z*: 305.1158 (*M* + *H*)<sup>+</sup>  $\text{C}_{18}\text{H}_{16}\text{F}_3\text{O}$  requires 305.1153.

## Synthetic transformations of compound 3aa. Synthesis of compounds 6 and 7

### (*Z,S*)-(-)-1,5-Diphenyl-3-(trifluoromethyl)pent-4-en-1-one (6)

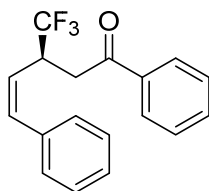

A solution of (*S*)-**3aa** (10.6 mg, 0.035 mmol, 80% *ee*) in benzene (0.5 mL) was stirred in the presence of Lindlar's catalyst (2.5 mg) under hydrogen atmosphere (balloon) for 1 h. Then, the reaction mixture was filtered through a pad of Celite® eluting with EtOAc. The solvent was removed under reduced pressure to give **5** (9.4 mg, 88%).

Enantiomeric excess (80%) was determined by chiral HPLC (Chiralpak AD-H), hexane-*i*PrOH 99:01, 1 mL/min, major enantiomer  $t_r = 7.7$  min, minor enantiomer  $t_r = 7.3$  min.

$[\alpha]_D^{20} -70.2$  ( $c$  0.45,  $\text{CHCl}_3$ , 80% *ee*);  $^1\text{H}$  NMR (300 MHz,  $\text{CDCl}_3$ )  $\delta$  7.79 (dd,  $J = 3.9$ , 1.1 Hz, 1H), 7.71 (dd,  $J = 4.9$ , 1.1 Hz, 1H), 7.40 (dd,  $J = 3.0$ , 1.2 Hz, 1H), 7.22 (dd,  $J = 5.0$ , 3.0 Hz, 1H), 7.17 (dd,  $J = 5.0$ , 3.9 Hz, 1H), 7.04 (dd,  $J = 5.0$ , 1.2 Hz, 1H), 4.22-4.11 (m, 1H), 3.49 (dd,  $J = 16.7$ , 8.9 Hz, 1H), 3.34 (dd,  $J = 16.7$ , 4.4 Hz, 1H);  $^{13}\text{C}$  NMR (75.5 MHz,  $\text{CDCl}_3$ )  $\delta$  195.5 (C), 136.3 (C), 135.9 (C), 135.7 (CH), 133.4 (CH), 128.7 (2CH), 128.4 (2CH), 128.3 (2CH), 128.1 (2CH), 127.5 (CH), 125.1 (q,  $J = 279.5$  Hz,  $\text{CF}_3$ ), 123.8 (q,  $J = 2.3$  Hz, CH), 38.3 (q,  $J = 27.4$  Hz, CH), 38.0 (q,  $J = 1.8$  Hz,  $\text{CH}_2$ );  $^{19}\text{F}$  NMR (282 MHz,  $\text{CDCl}_3$ )  $\delta$  -71.0 (s, 3F); HRMS (ESI)  $m/z$ : 305.1159 ( $\text{M} + \text{H}$ ) $^+$   $\text{C}_{18}\text{H}_{16}\text{F}_3\text{O}$  requires 305.1153.

### (*R*)-(-)-3-Iodo-2,6-diphenyl-4-(trifluoromethyl)-4*H*-pyran (7).

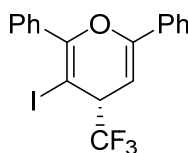

A solution of  $\text{I}_2$  (30.1 mg, 0.119 mmol) in  $\text{CH}_2\text{Cl}_2$  (2 mL) was added to a mixture of (*S*)-**3aa** (18 mg, 0.060 mmol 85% *ee*) and  $\text{NaHCO}_3$  (10 mg, 0.119 mmol) under nitrogen atmosphere. The solution was stirred overnight at 40 °C (reflux). The reaction mixture was quenched with saturated aqueous  $\text{Na}_2\text{S}_2\text{O}_3$  (1.0 mL), extracted with  $\text{CH}_2\text{Cl}_2$  ( $2 \times 15$  mL), washed with brine (15 mL), dried over  $\text{MgSO}_4$  and concentrated under reduced pressure. Purification by flash chromatography on silica gel eluting with hexane: $\text{Et}_2\text{O}$  (98:02) gave compound **7** (19.9 mg, 77%). Enantiomeric excess (84%) was determined by chiral HPLC (Chiralpak AD-H), hexane-*i*PrOH 99:01, 1 mL/min, major enantiomer  $t_r = 6.5$  min, minor enantiomer  $t_r = 4.7$  min.

$[\alpha]_D^{20} -7.0$  ( $c$  0.45,  $\text{CHCl}_3$ , 84% *ee*);  $^1\text{H}$  NMR (300 MHz,  $\text{CDCl}_3$ )  $\delta$  7.69-7.58 (m, 4H), 7.54-7.42 (m, 3H), 7.42-7.34 (m, 3H), 5.29 (d,  $J = 5.8$  Hz, 1H), 4.16-4.02 (m, 1H);  $^{13}\text{C}$  NMR (75.5 MHz,  $\text{CDCl}_3$ )  $\delta$  155.1 (C), 153.1 (C), 135.9 (C), 132.3 (C), 129.9 (CH), 129.7 (2CH), 129.6 (CH), 128.7 (C), 128.5 (2CH), 128.2 (2CH), 125.4 (q,  $J = 223.7$  Hz,  $\text{CF}_3$ ), 125.0 (2CH), 90.4 (q,  $J = 1.8$  Hz, CH), 49.5 (q,  $J = 22.7$  Hz, CH);  $^{19}\text{F}$  NMR (282 MHz,  $\text{CDCl}_3$ )  $\delta$  -74.4 (s, 3F); HRMS (ESI)  $m/z$ : 428.9961 ( $\text{M} + \text{H}$ ) $^+$   $\text{C}_{18}\text{H}_{13}\text{F}_3\text{IO}$  requires 428.9958.

1. G. Blay, I. Fernández, M. C. Muñoz, J. R. Pedro, C. Vila *Chem. Eur. J.*, **2010**, *16*, 9117-9122.
2. (a) A. Morigaki, T. Tanaka, T. Miyabe, T. Ishihara, T. Konno, *Org. Biomol. Chem.*, 2013, **11**, 586; (b) T. Konno, T. Tanaka, A. Morigaki, T. Ishihara, *Tetrahedron Lett.*, 2008, **49**, 2106
3. We thank Professor Tsutomu Konno, Kyoto Institute of Technology, for sending us complete characterization data of compound (*E,R*)-5.

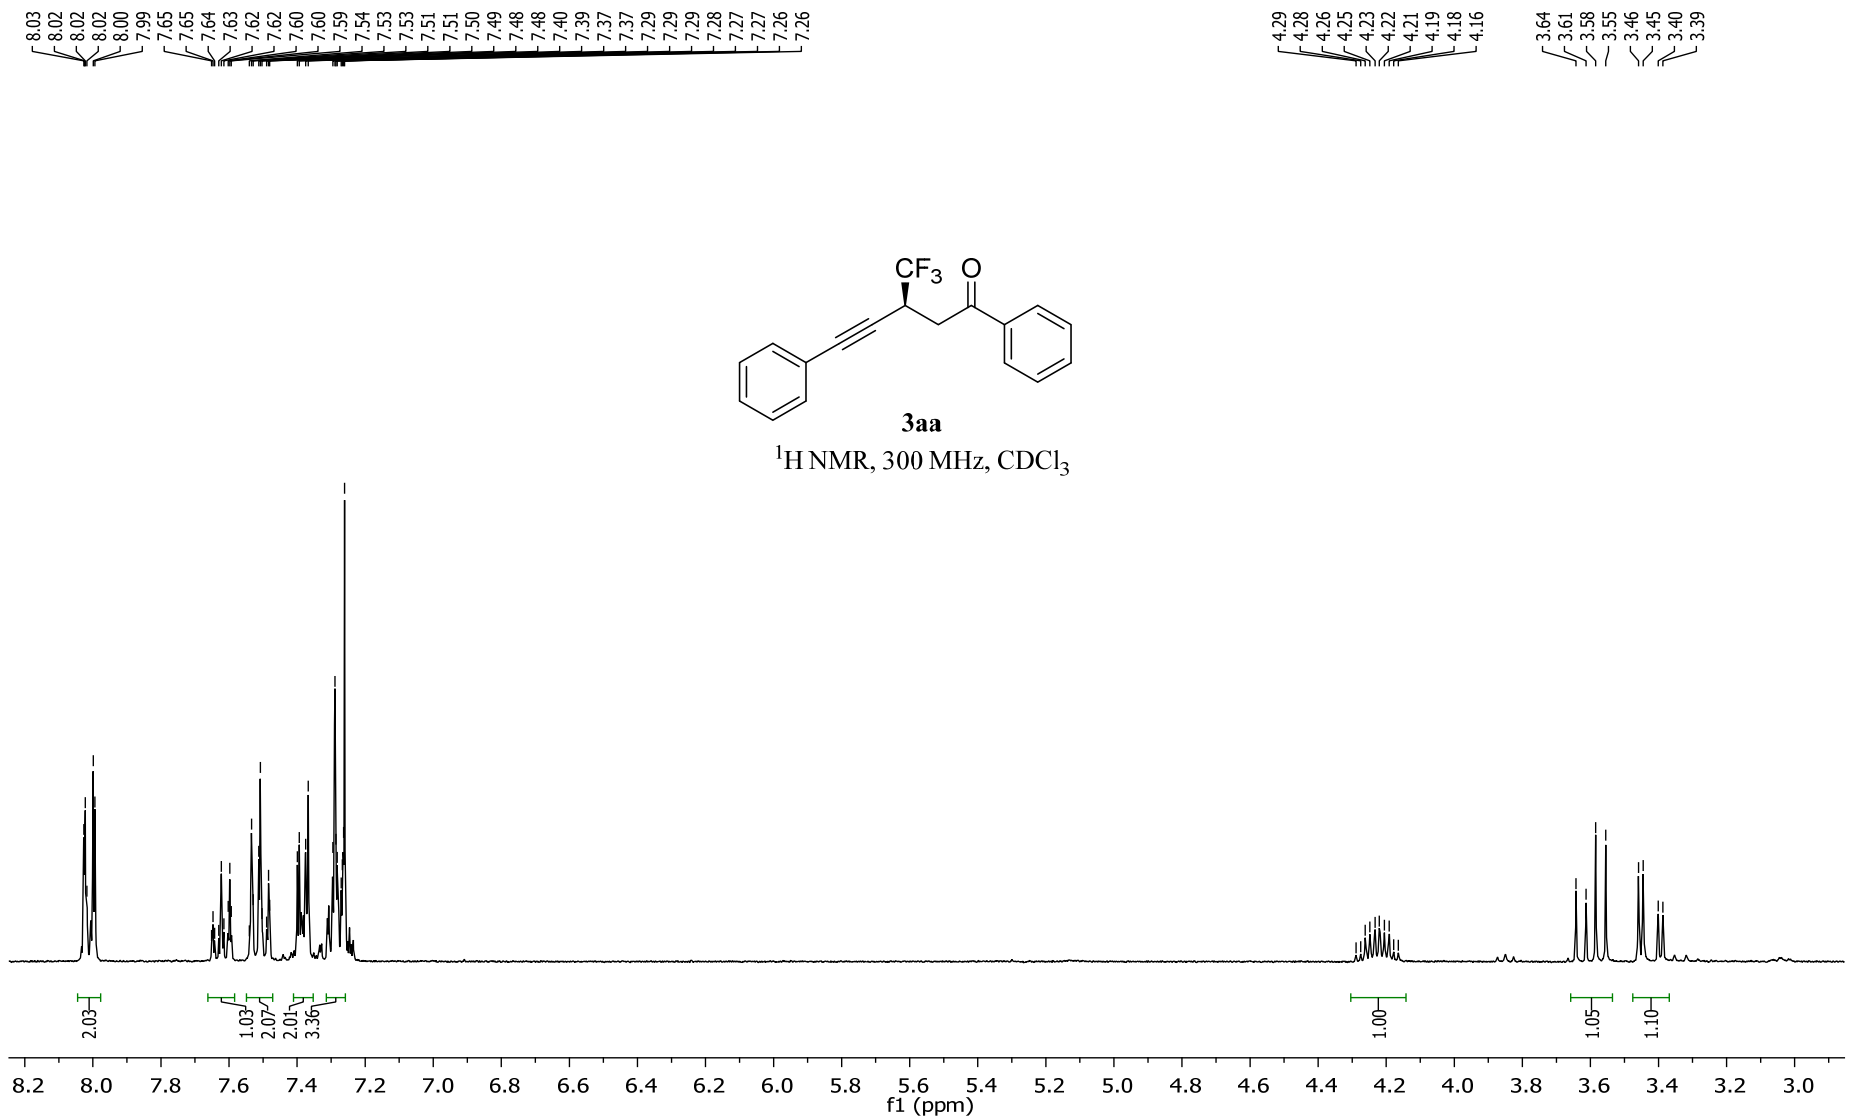

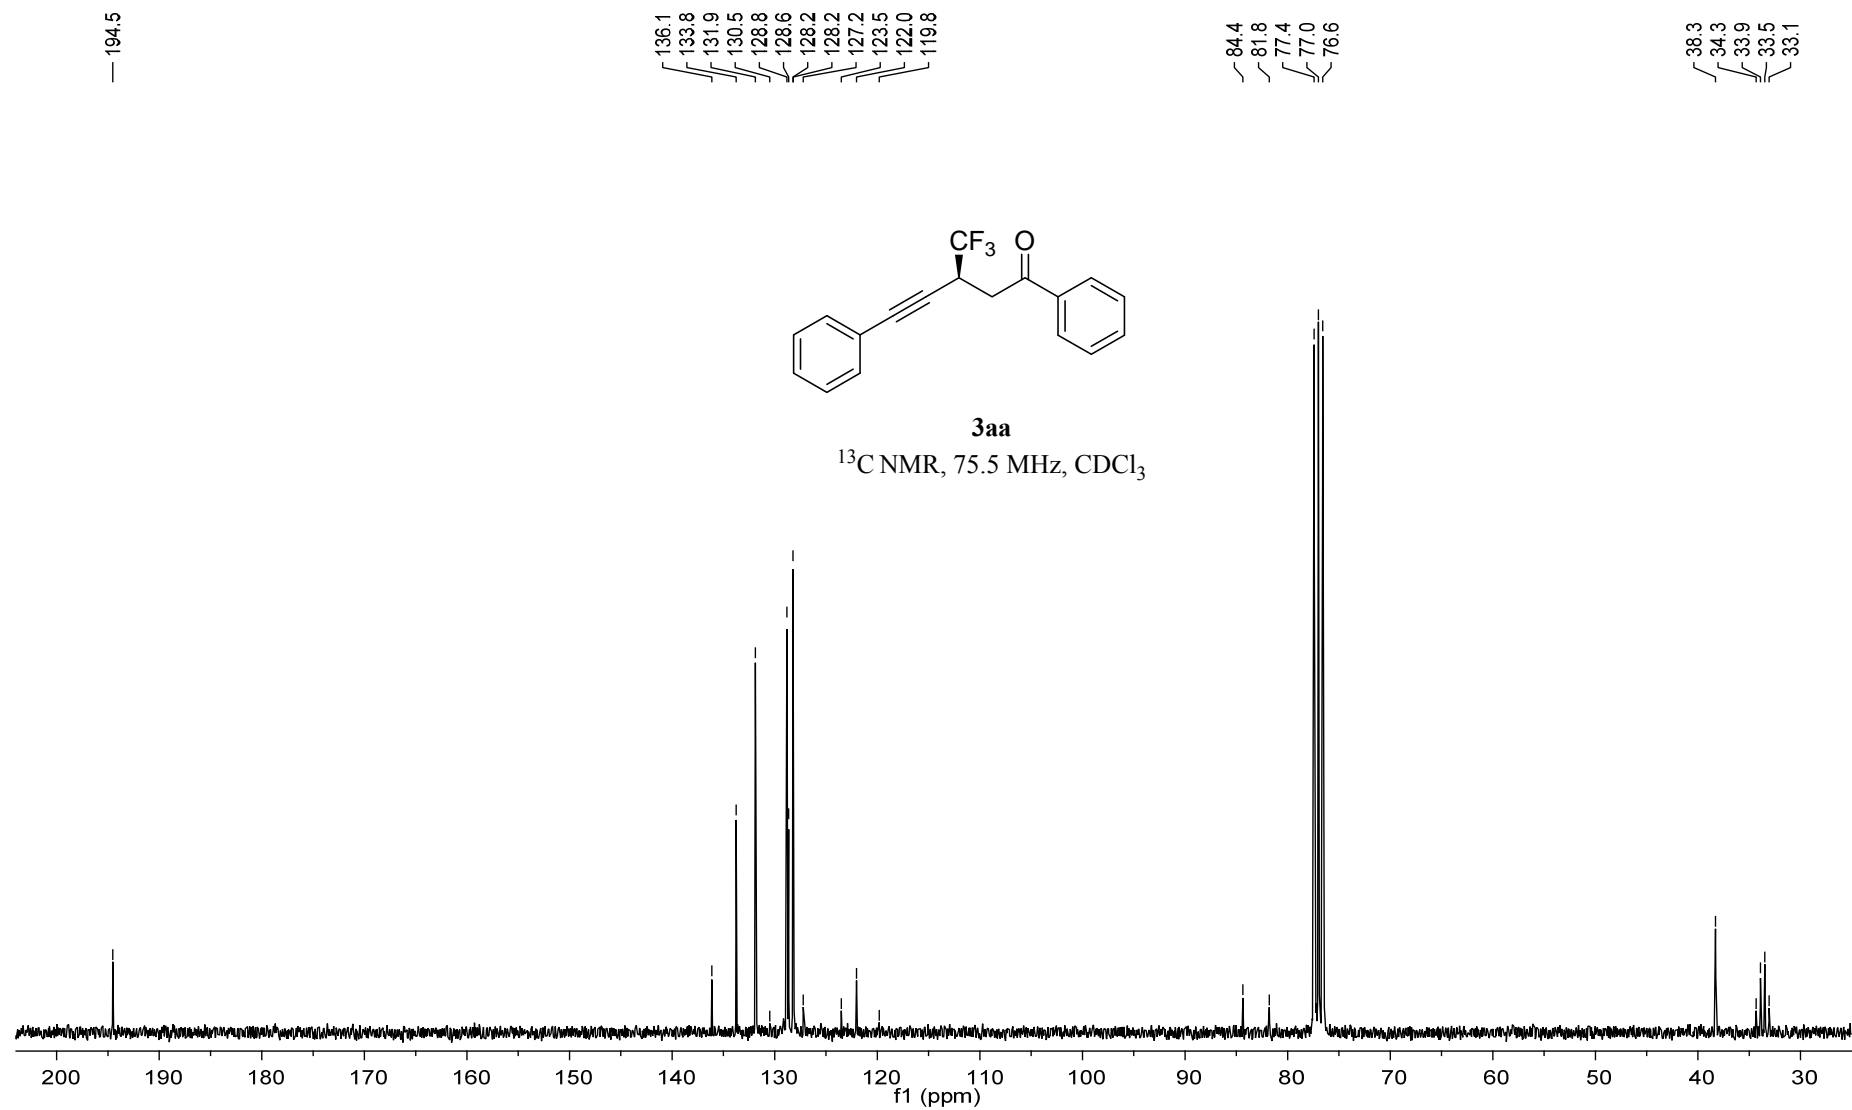

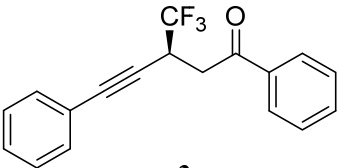

**3aa**

<sup>19</sup>F NMR, 282 MHz, CDCl<sub>3</sub>

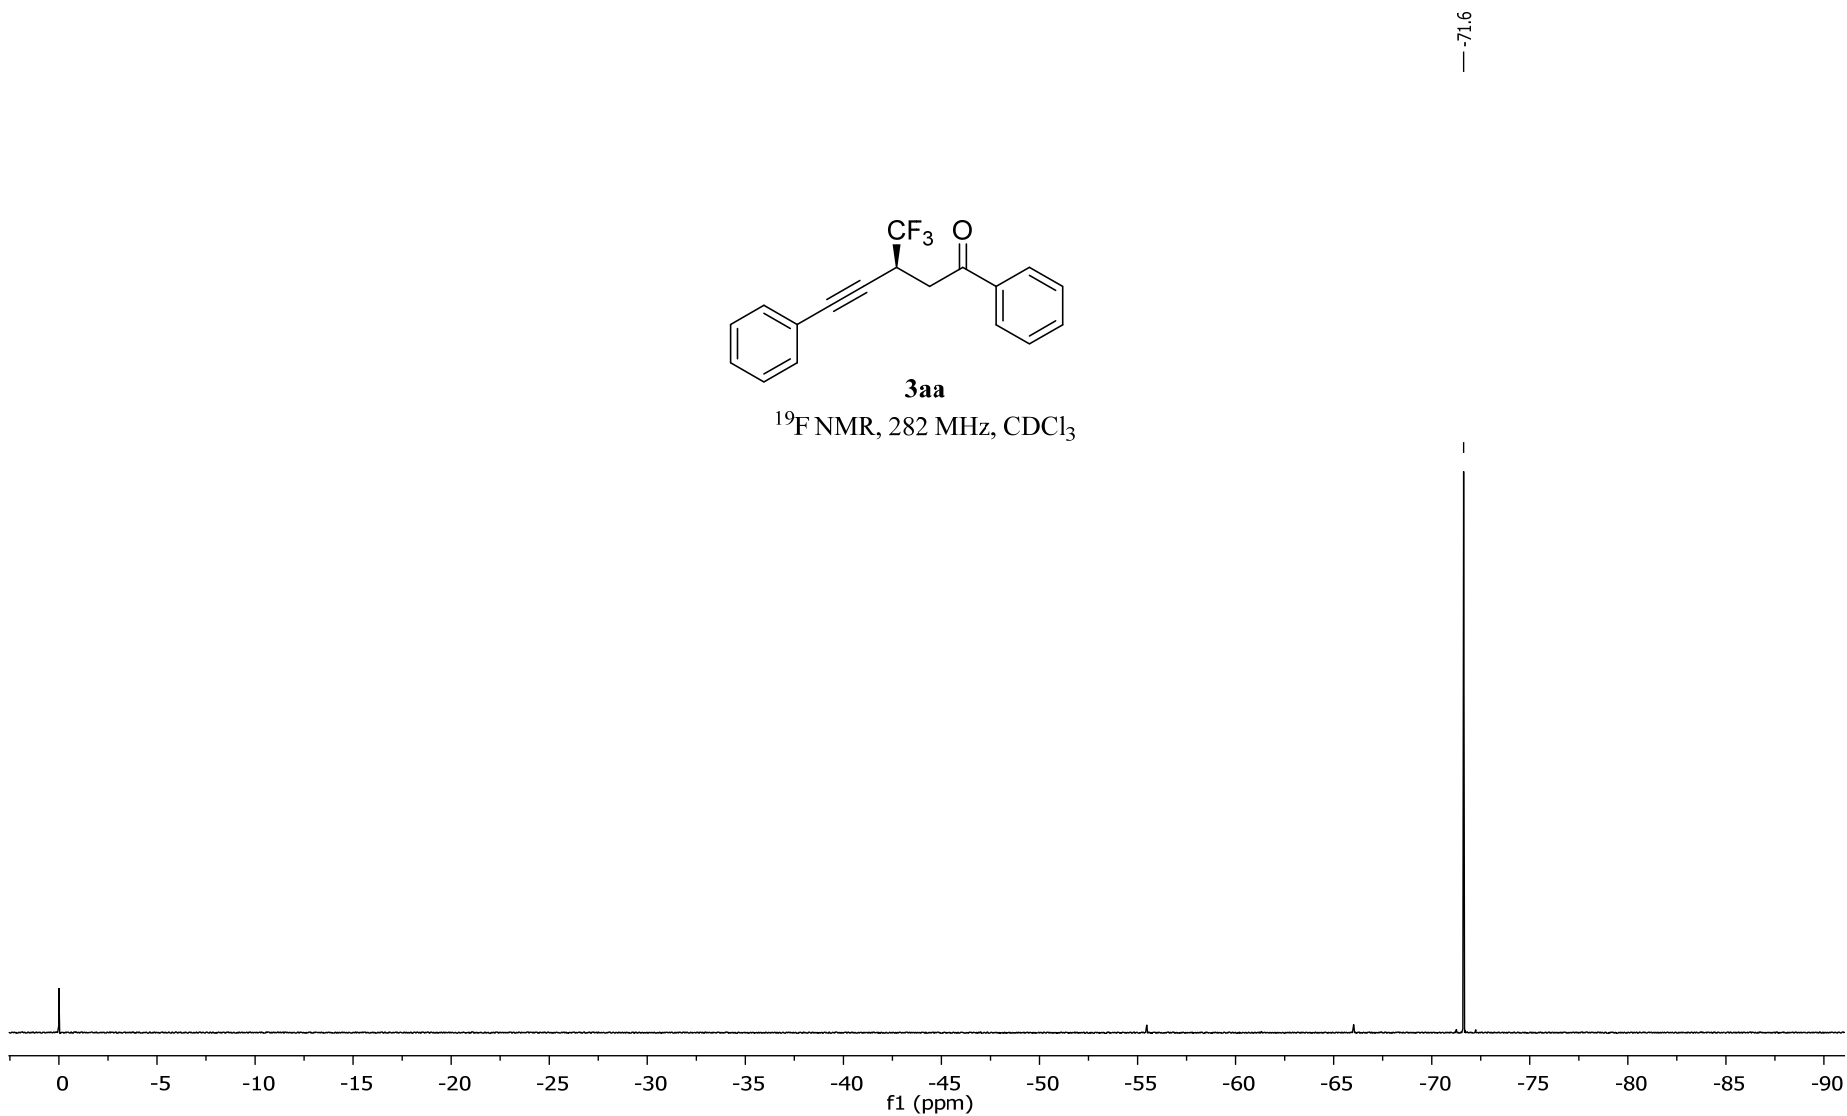

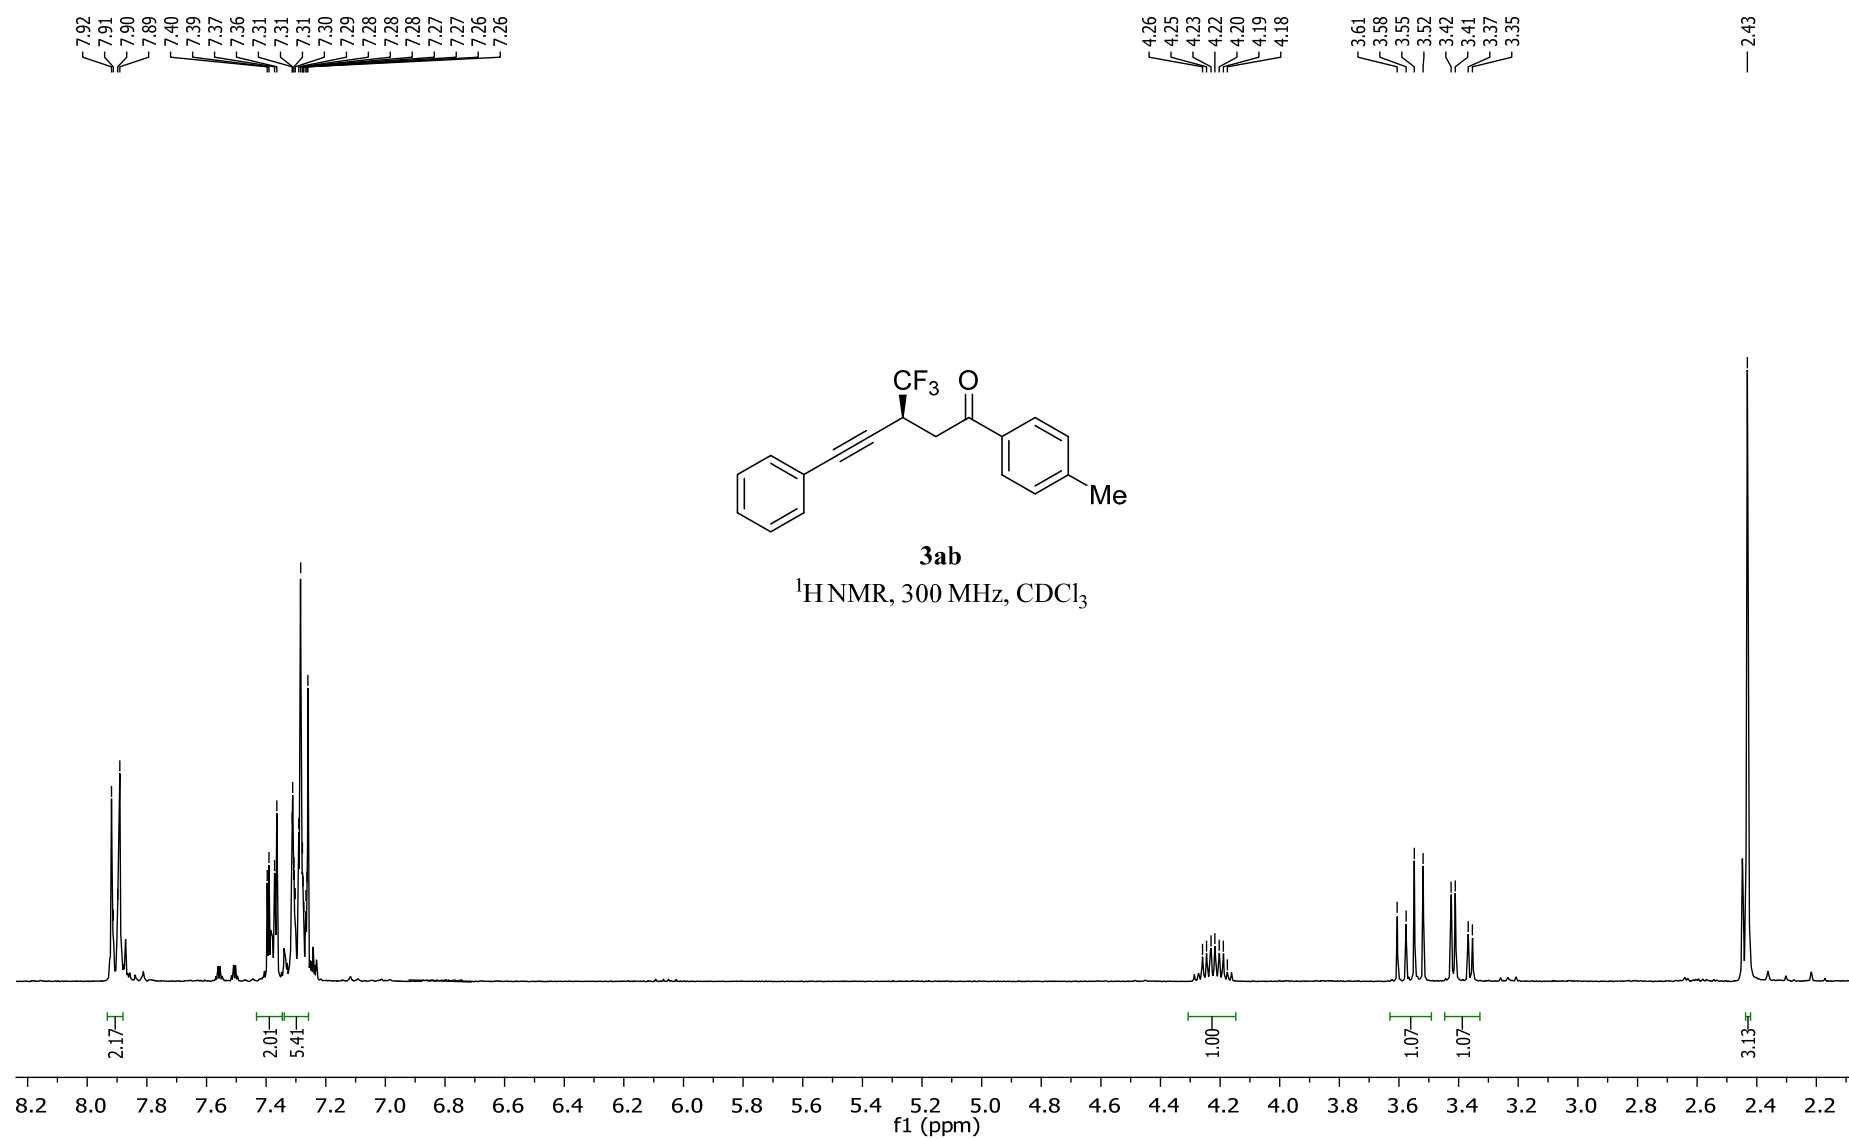

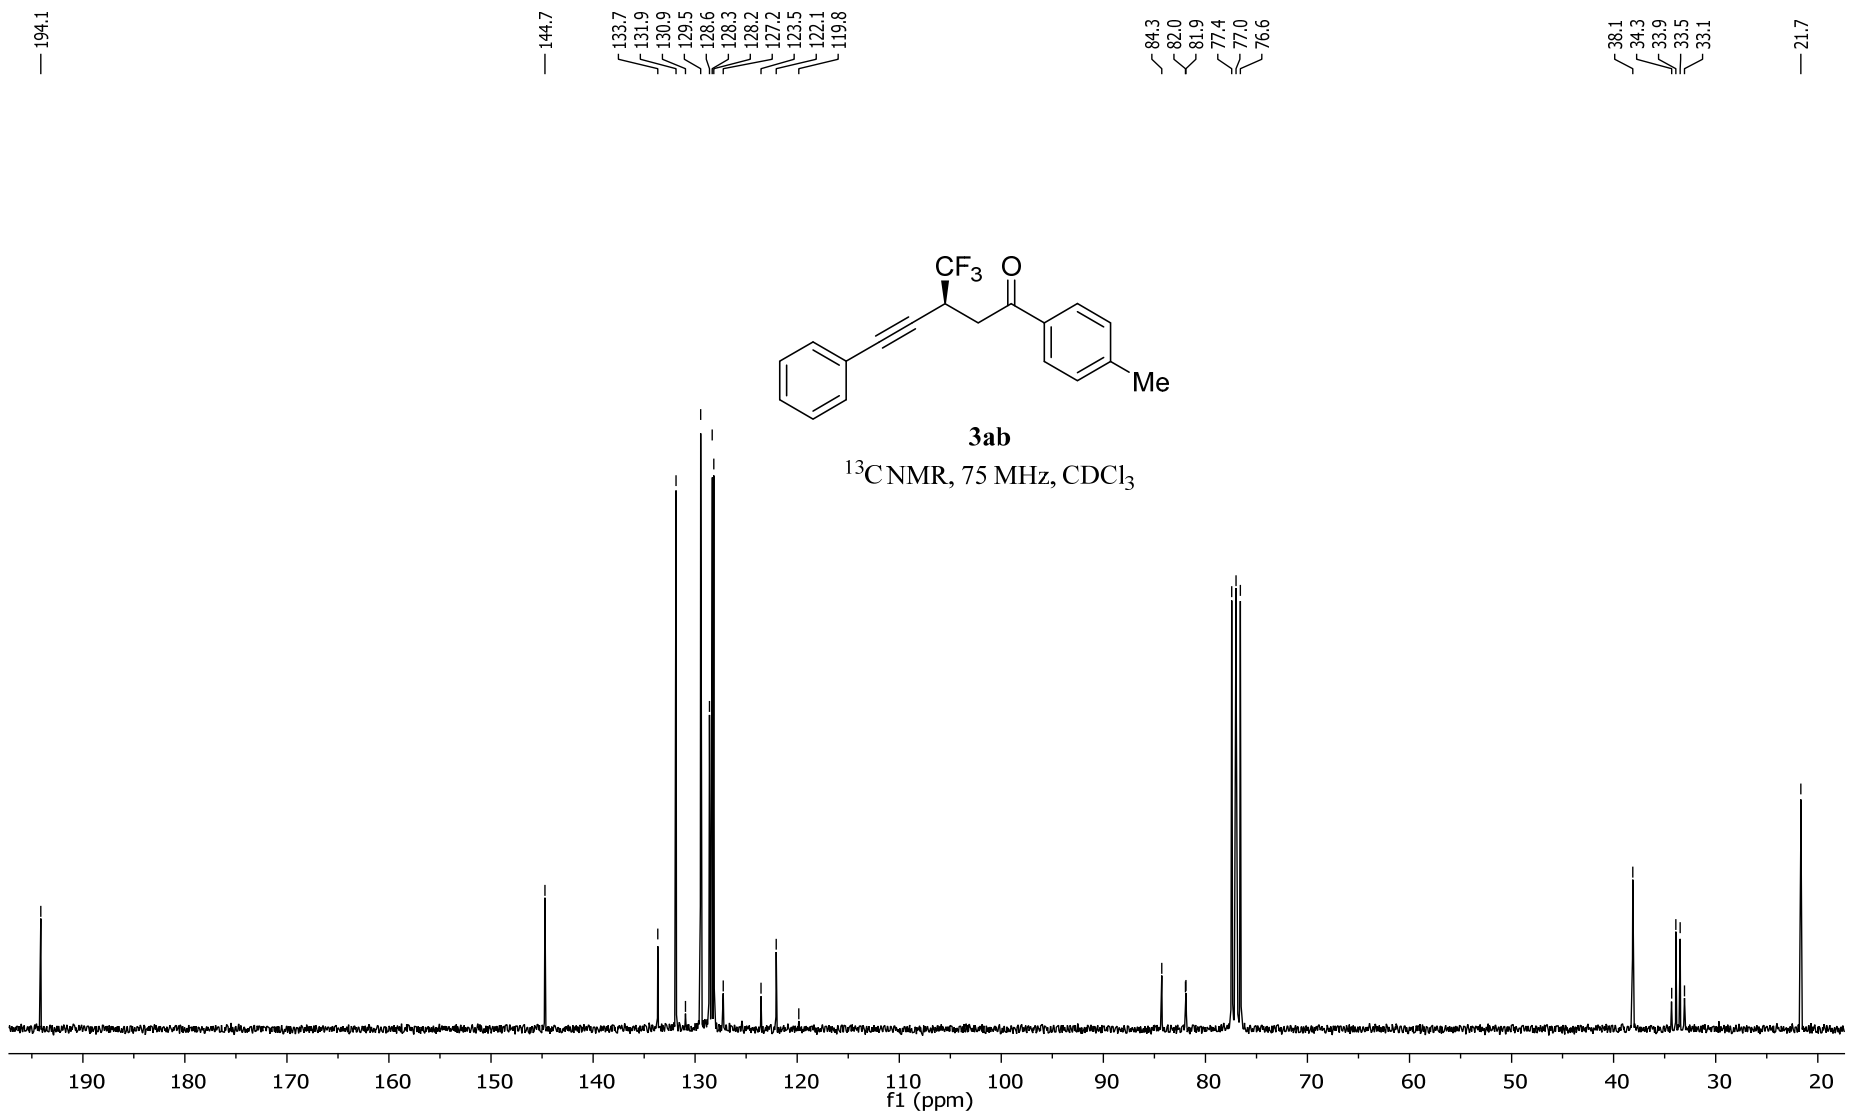

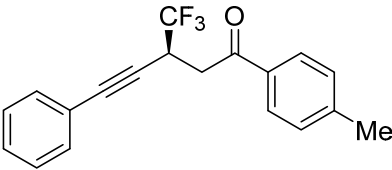

**3ab**

$^{19}\text{F}$  NMR, 282 MHz,  $\text{CDCl}_3$

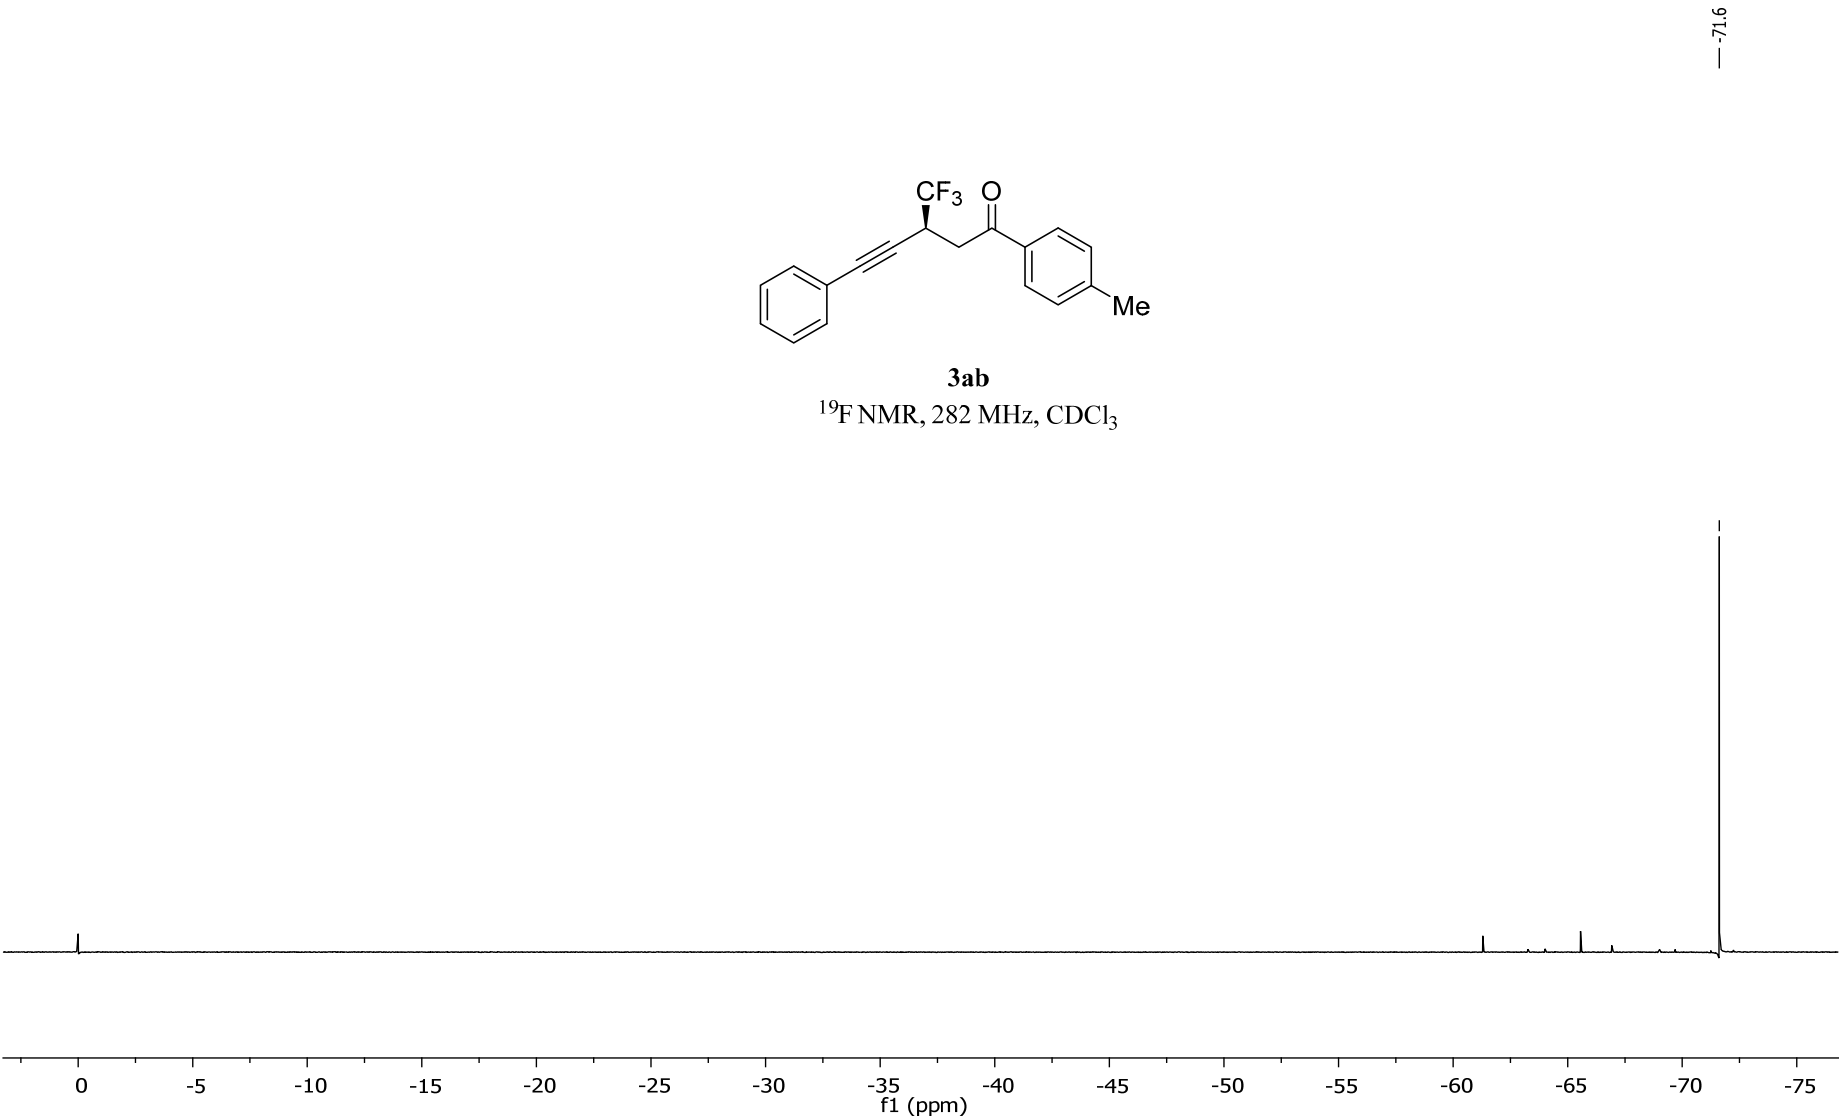

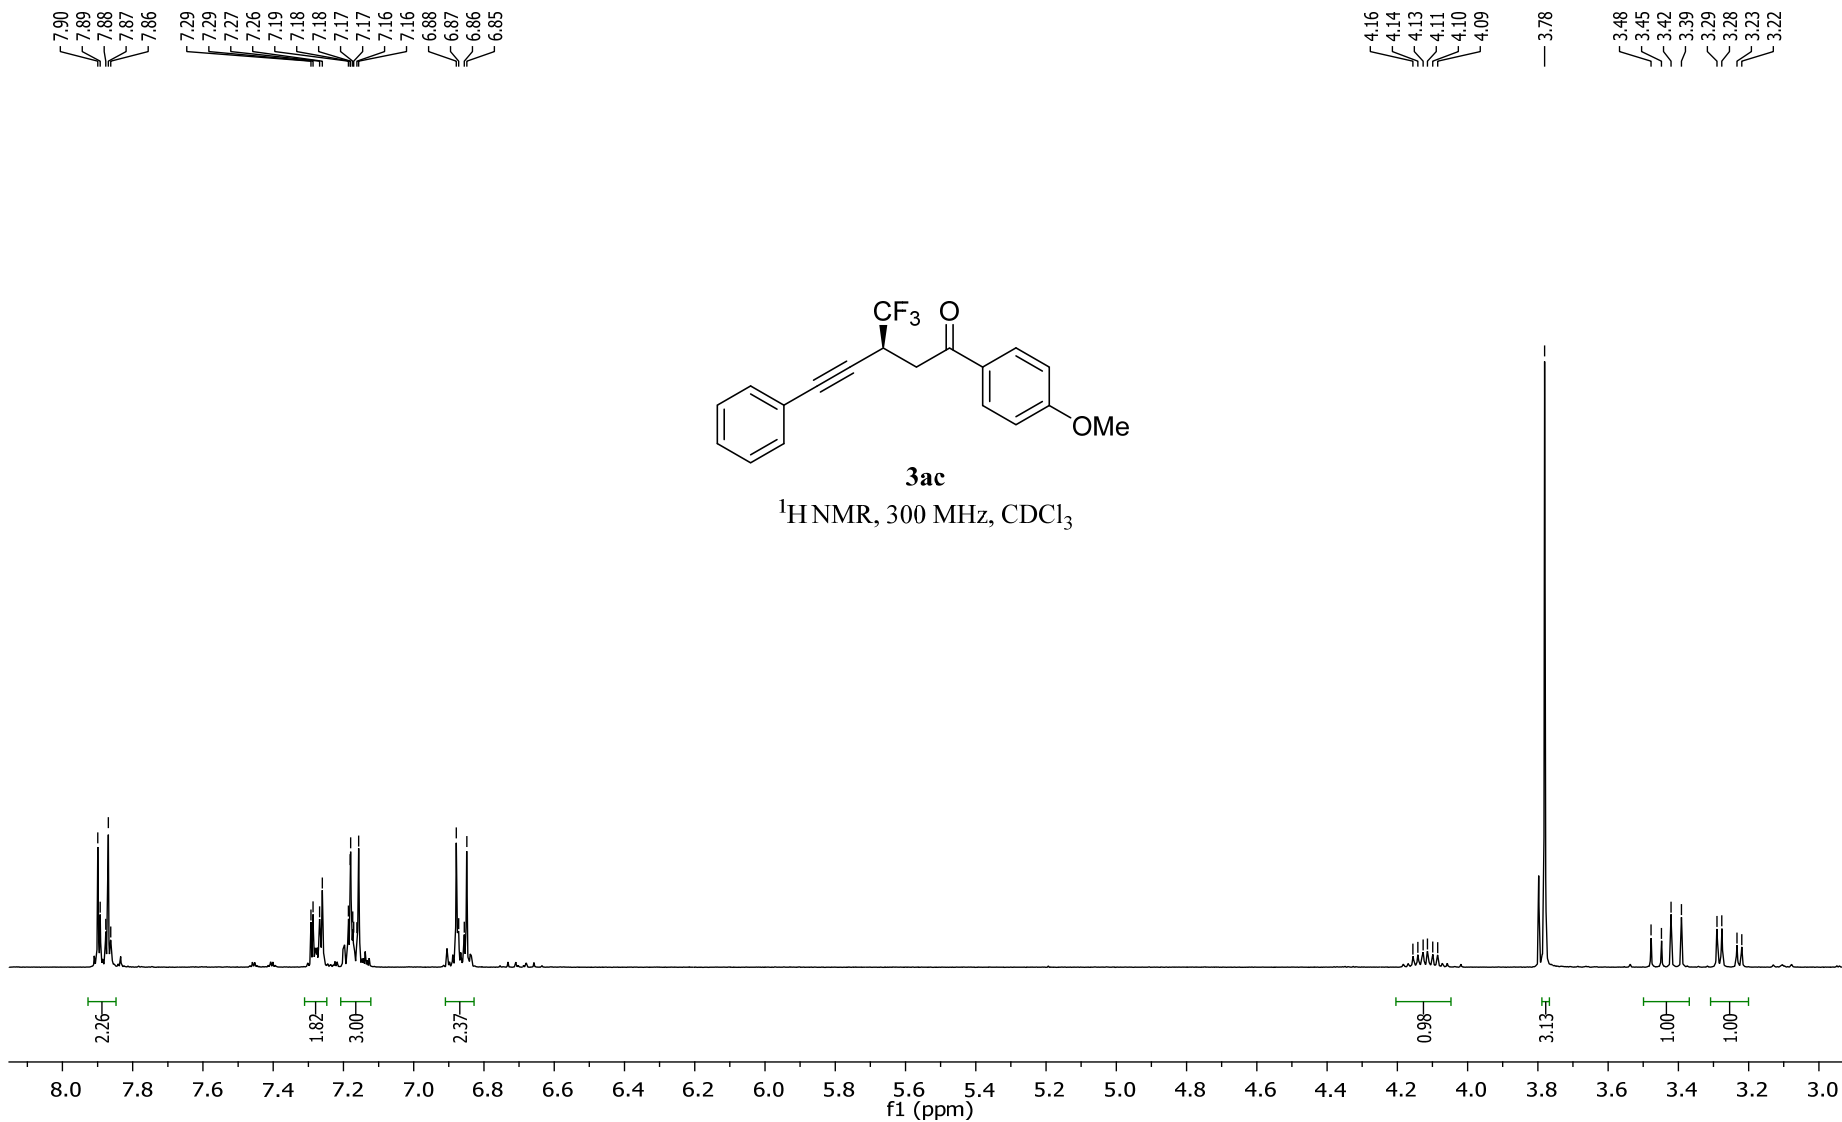

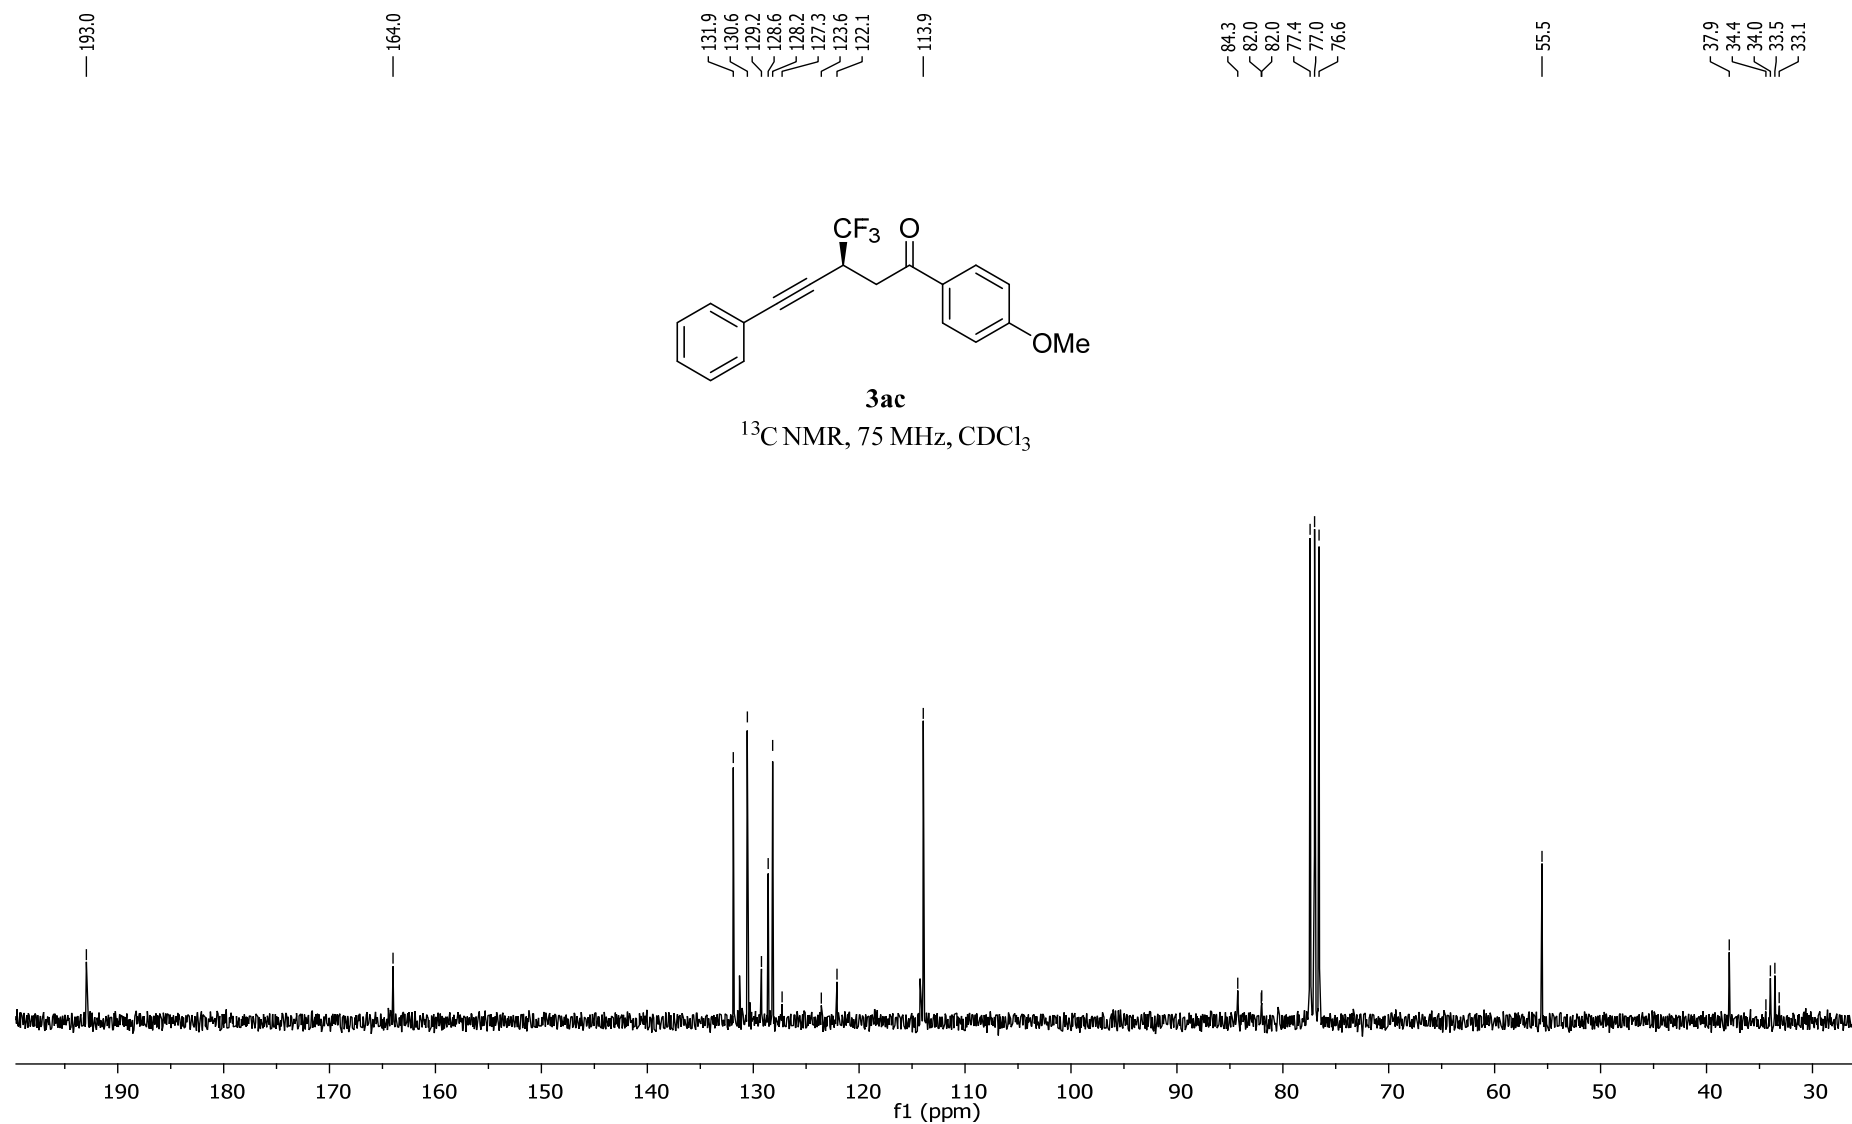

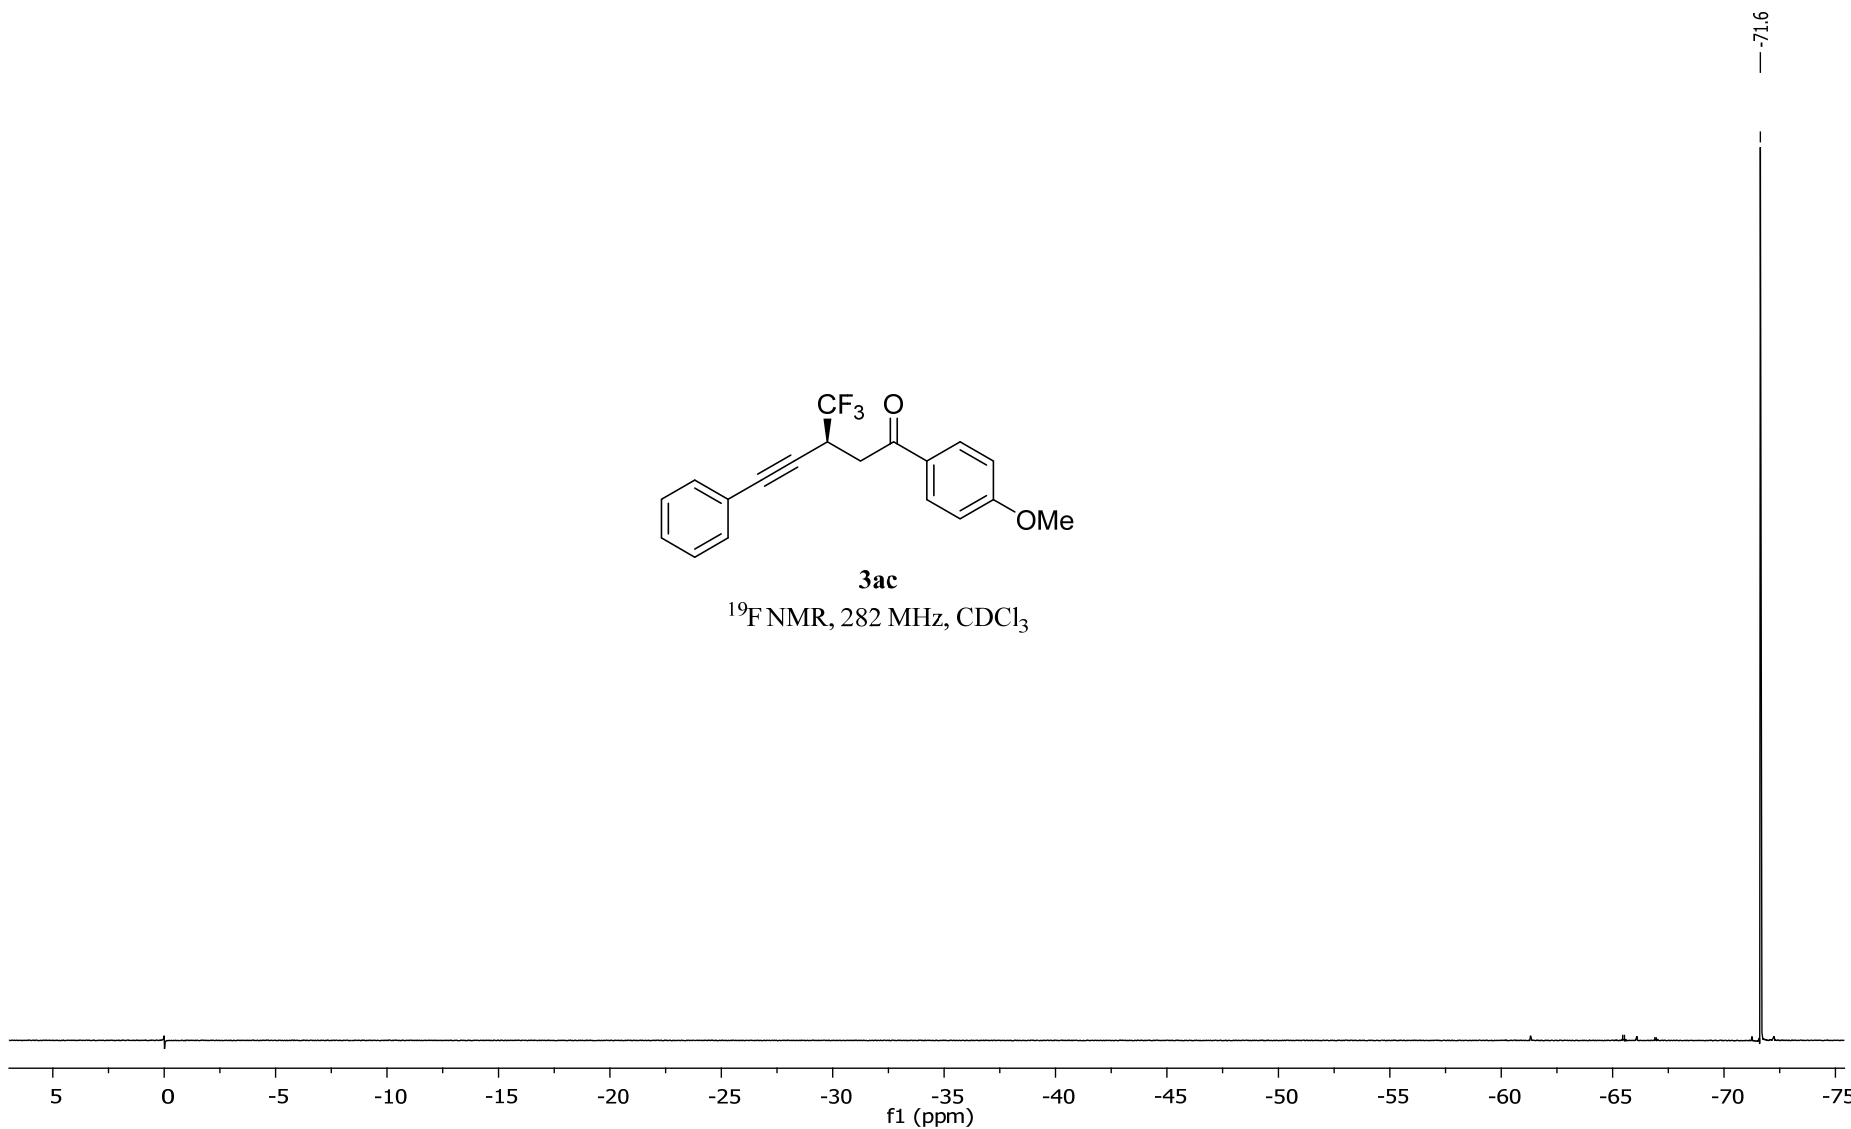

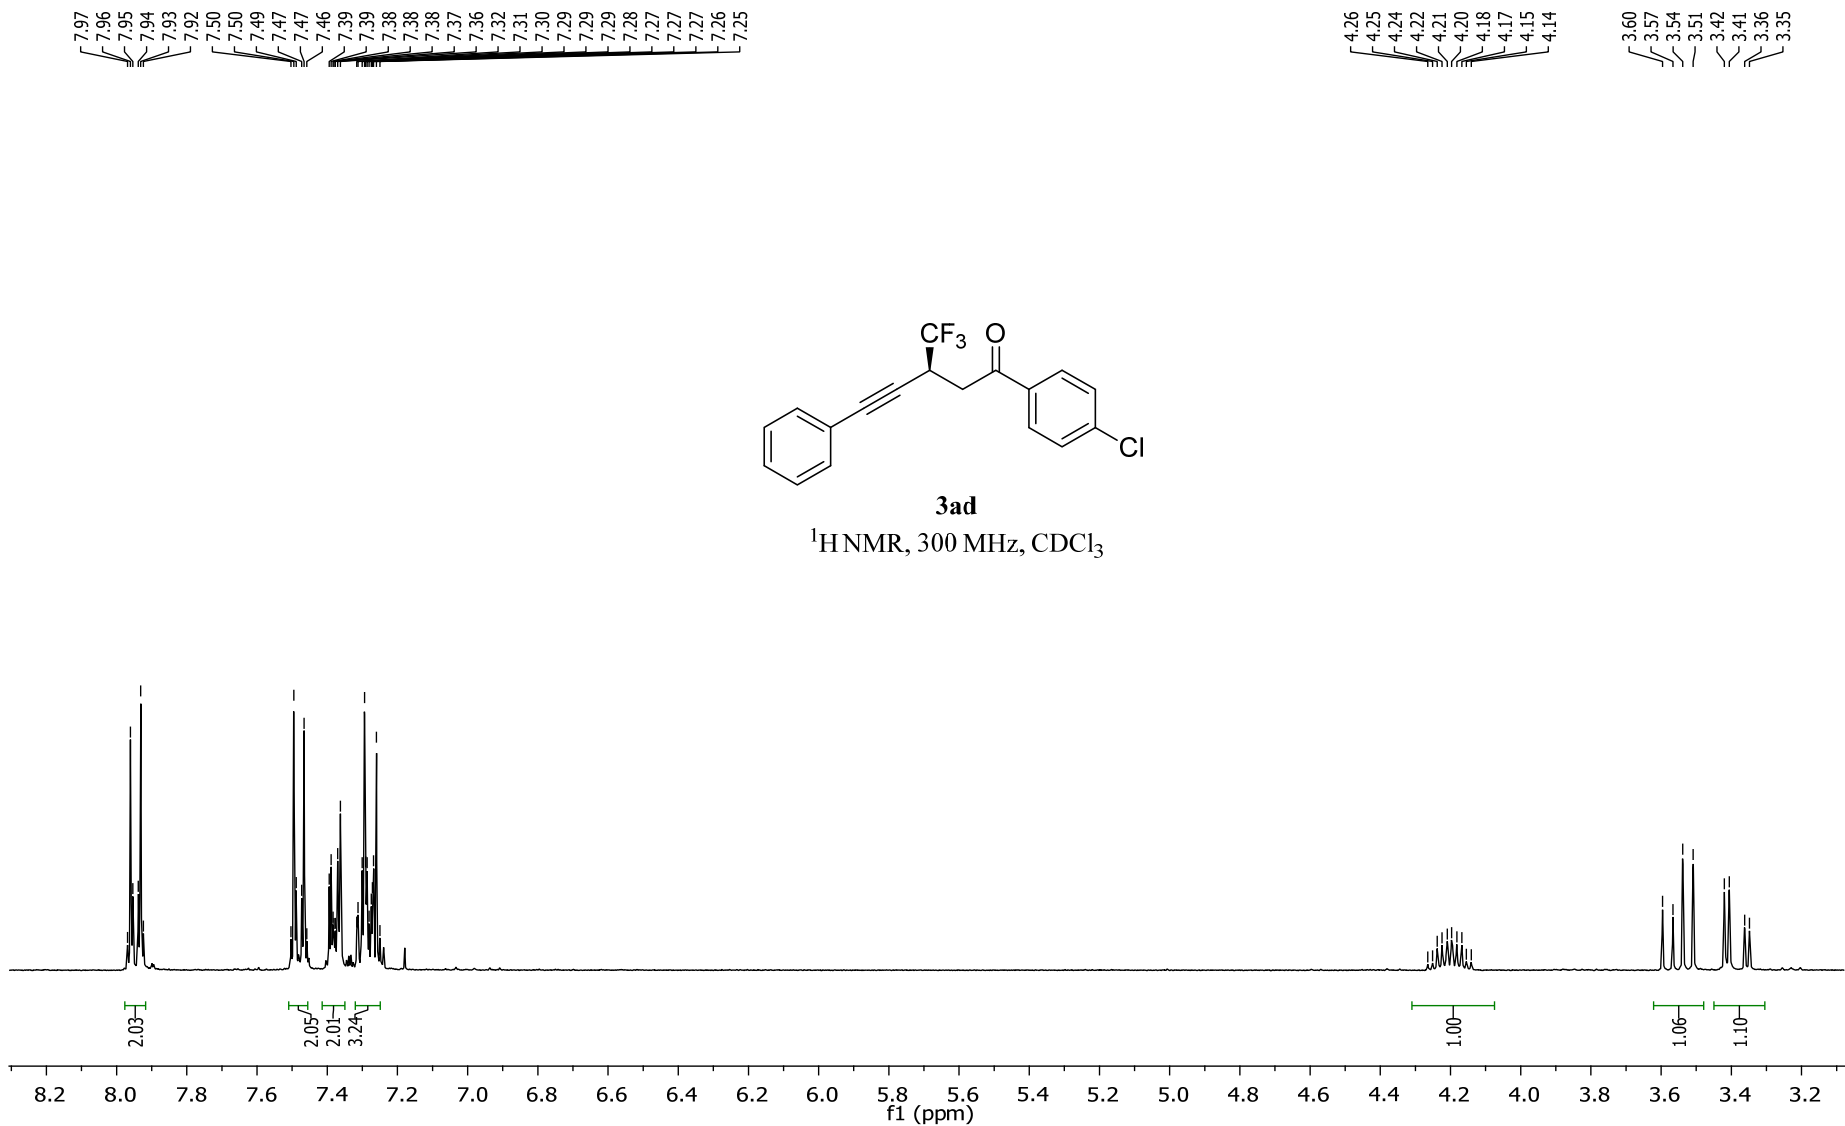

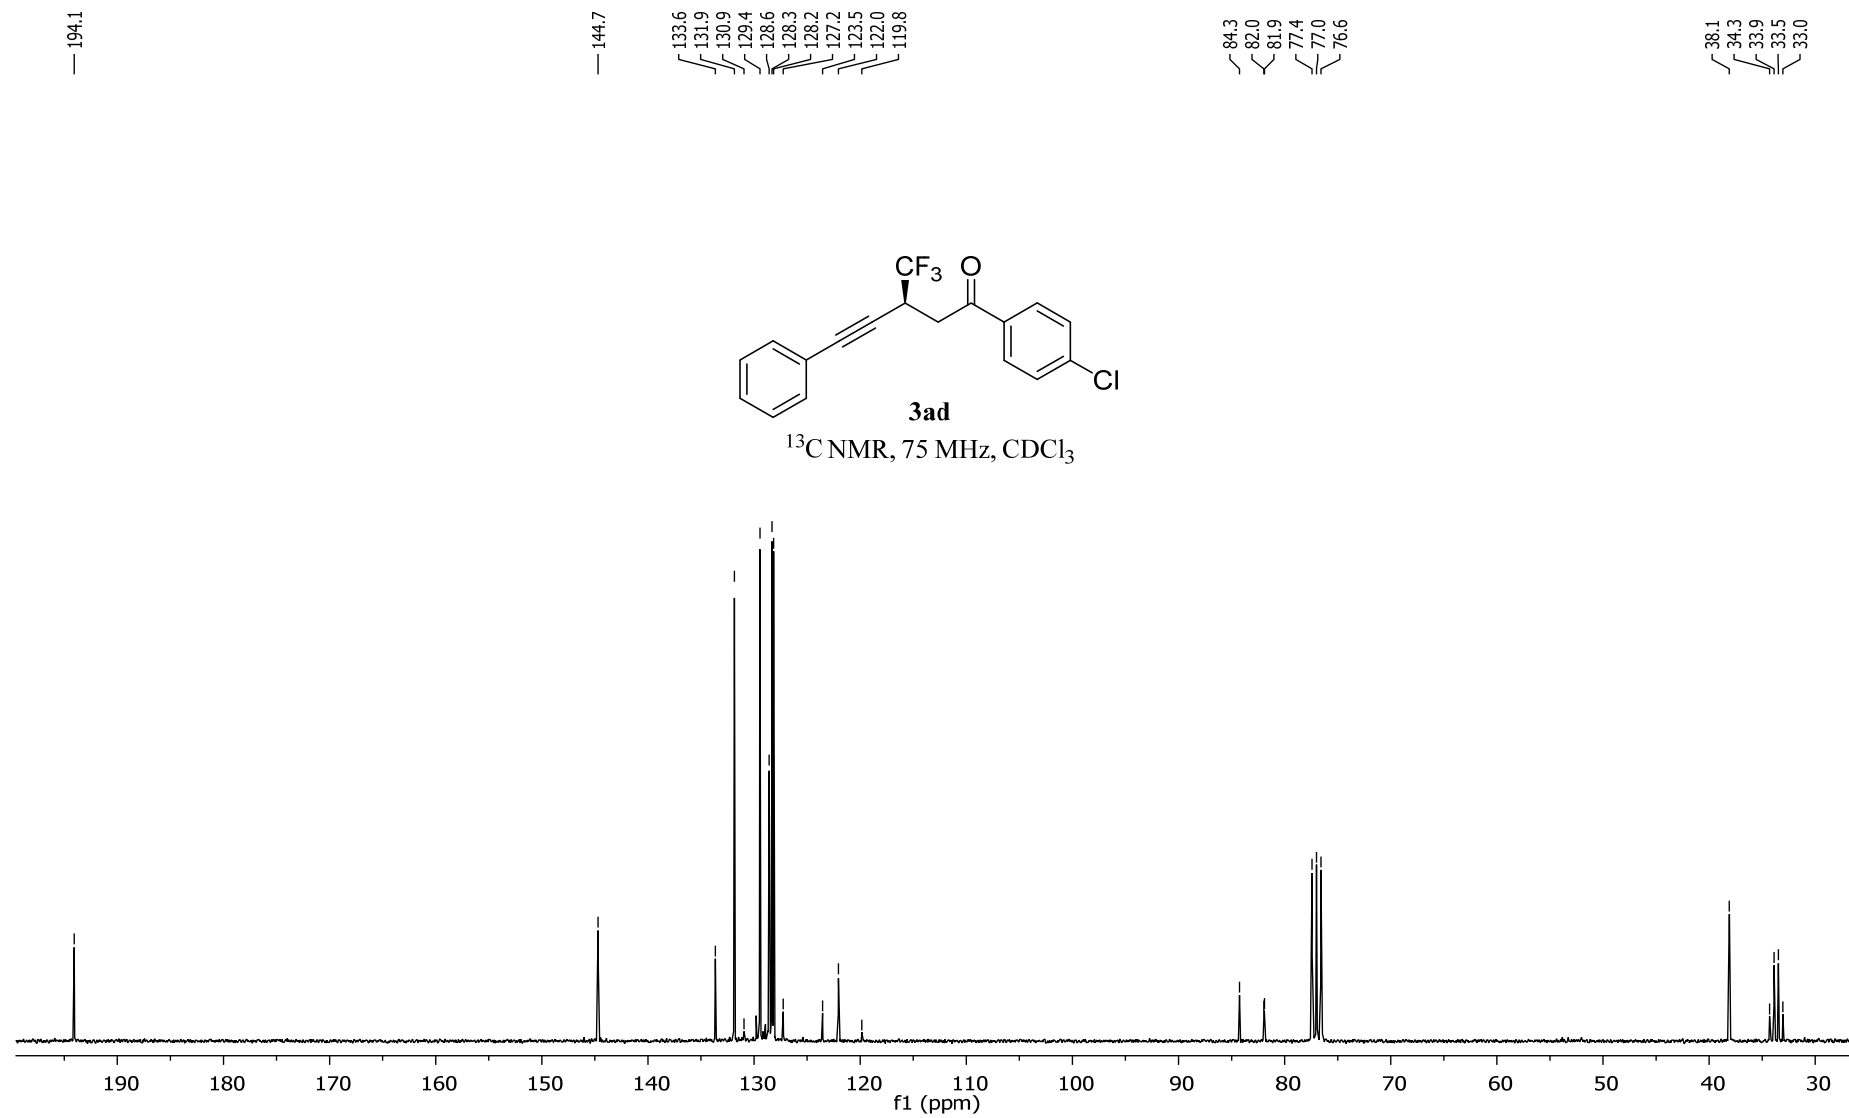

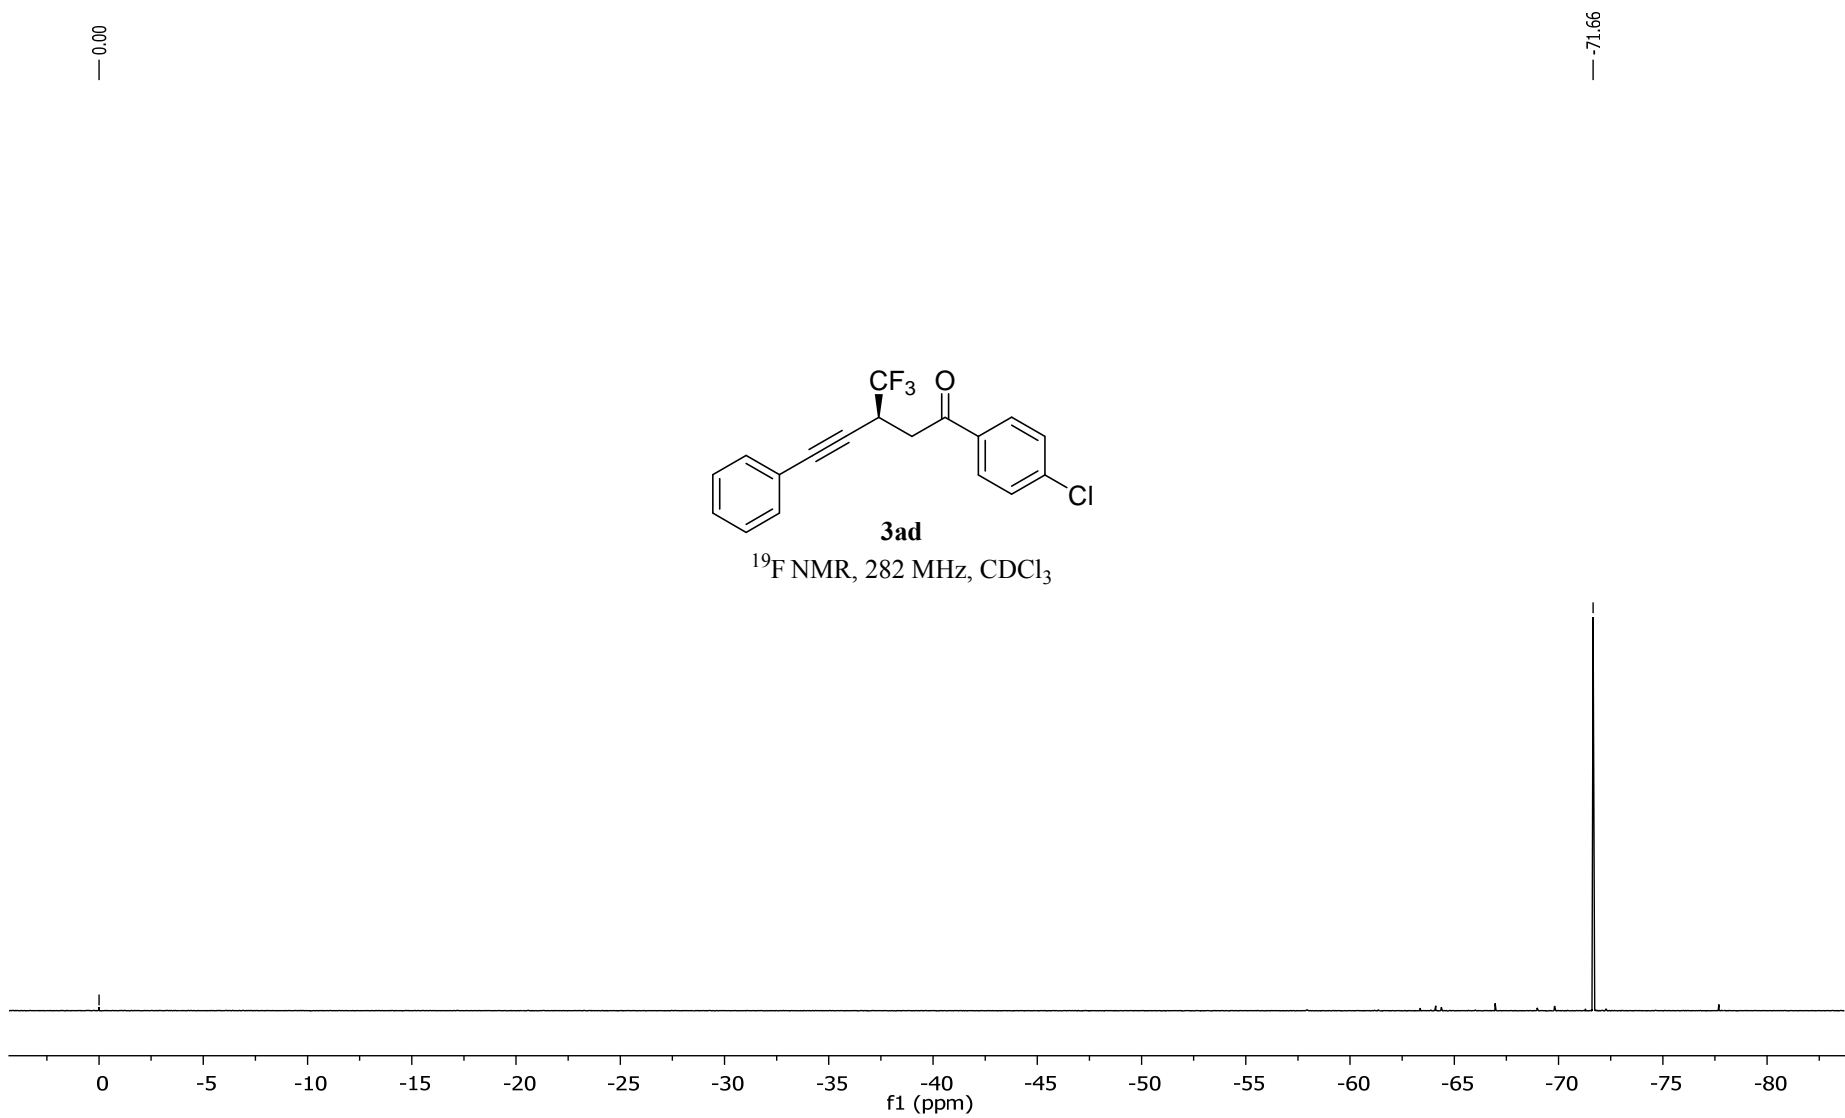

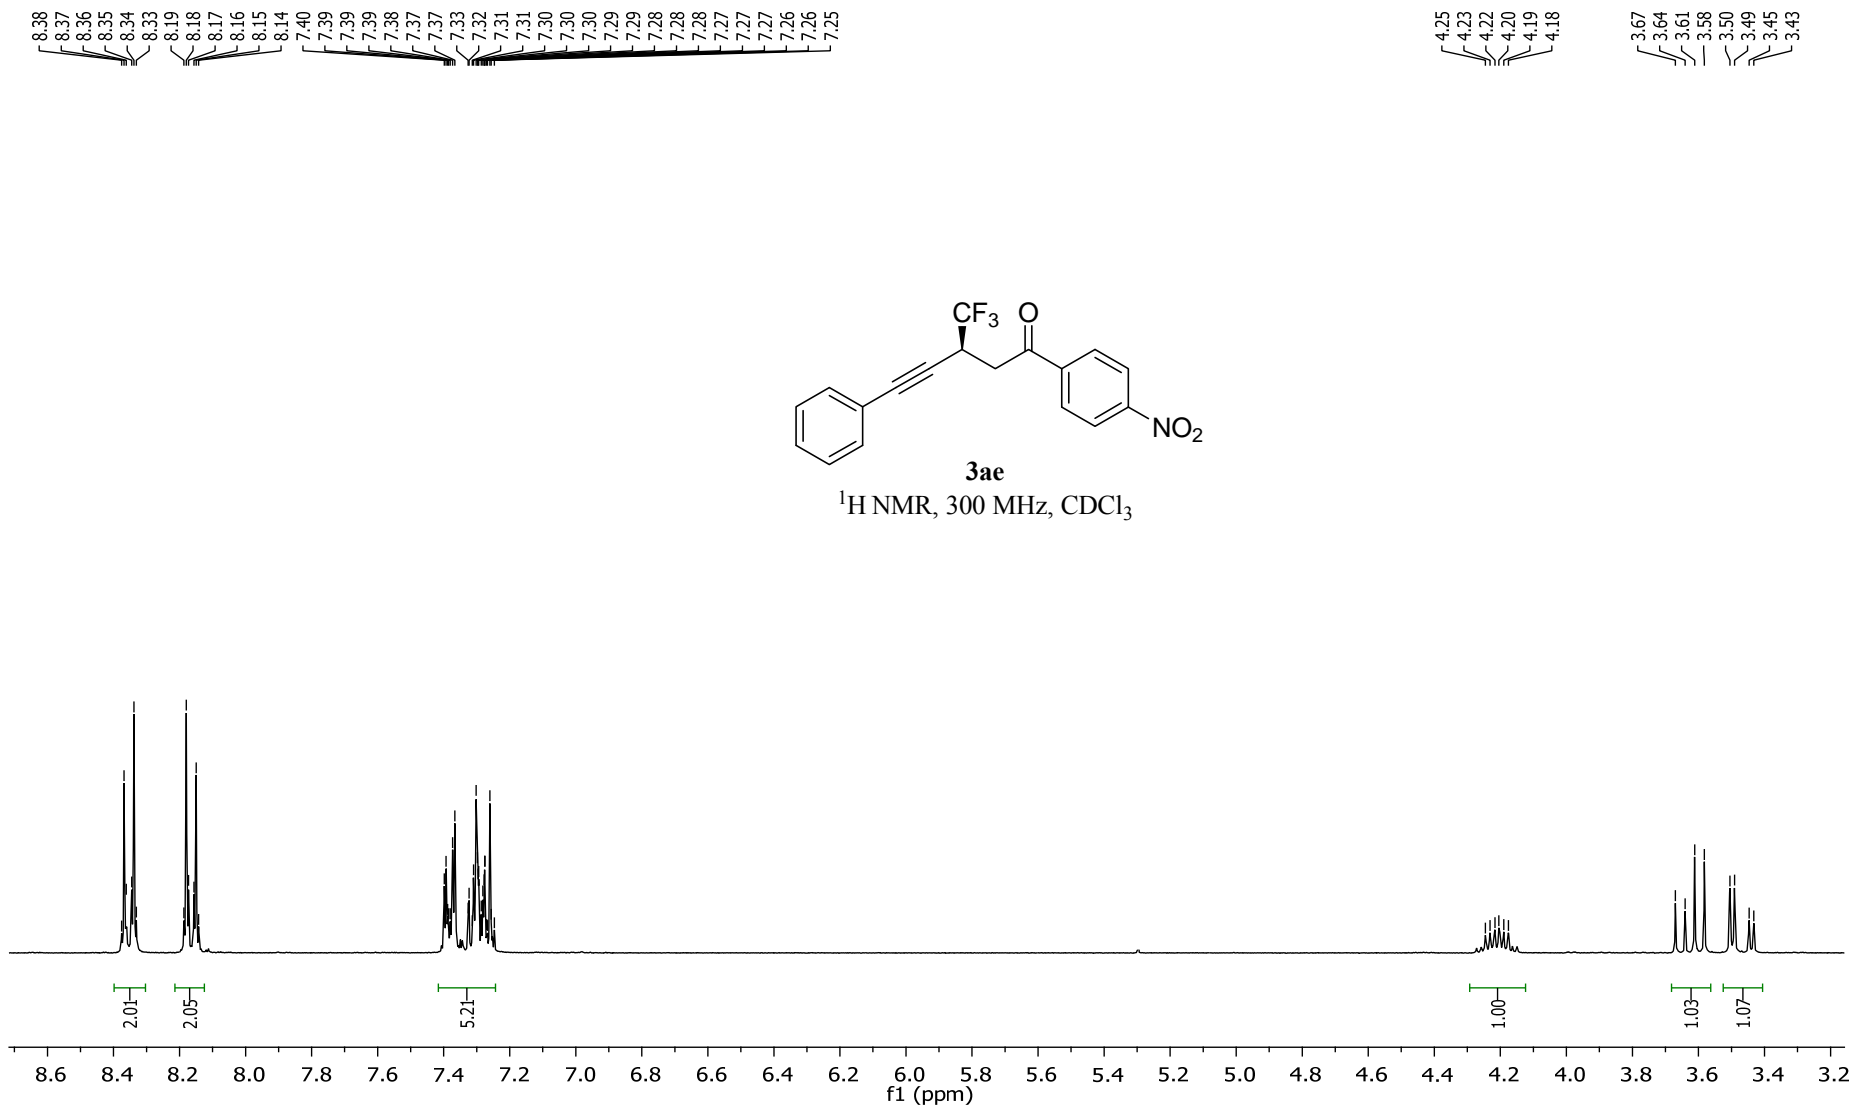

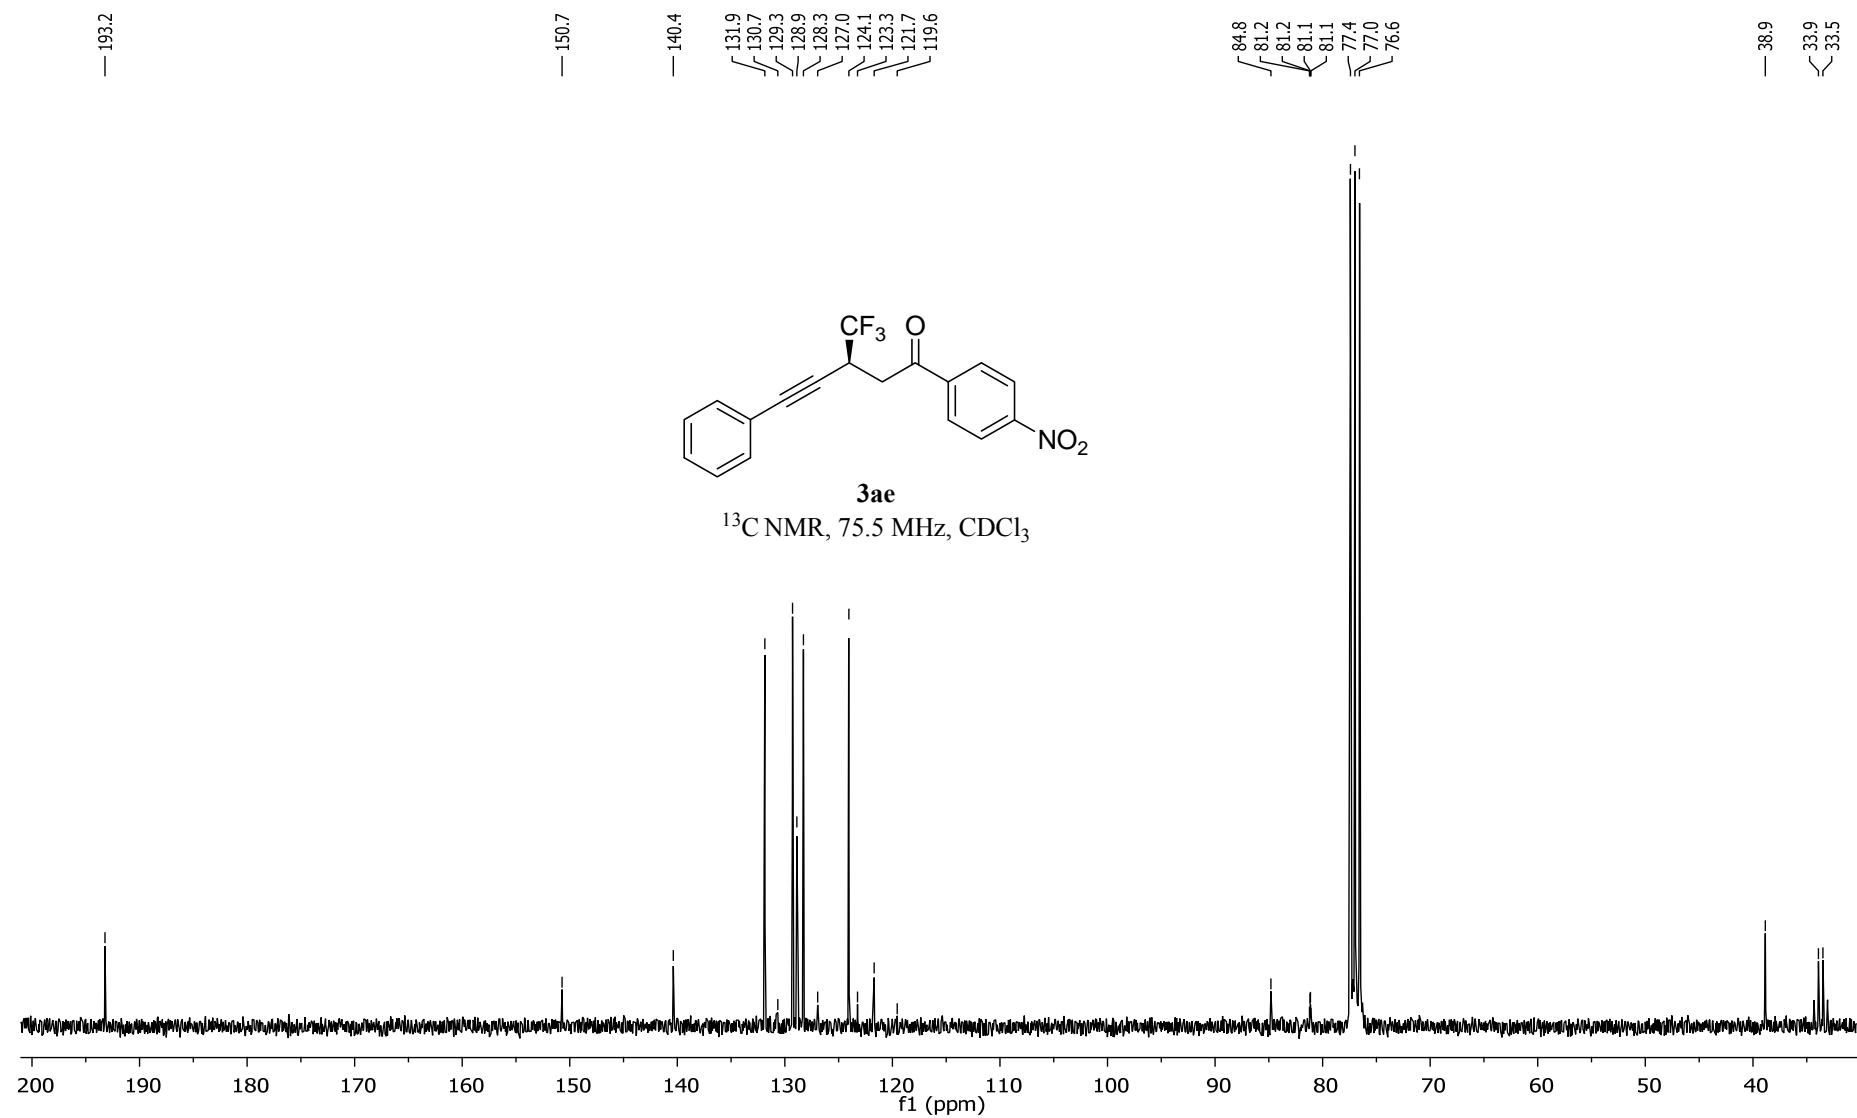

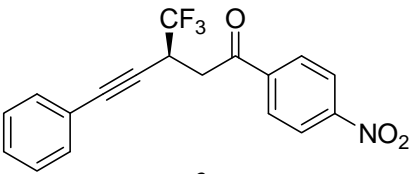

**3ae**  
<sup>19</sup>F NMR, 282 MHz, CDCl<sub>3</sub>

—71.6

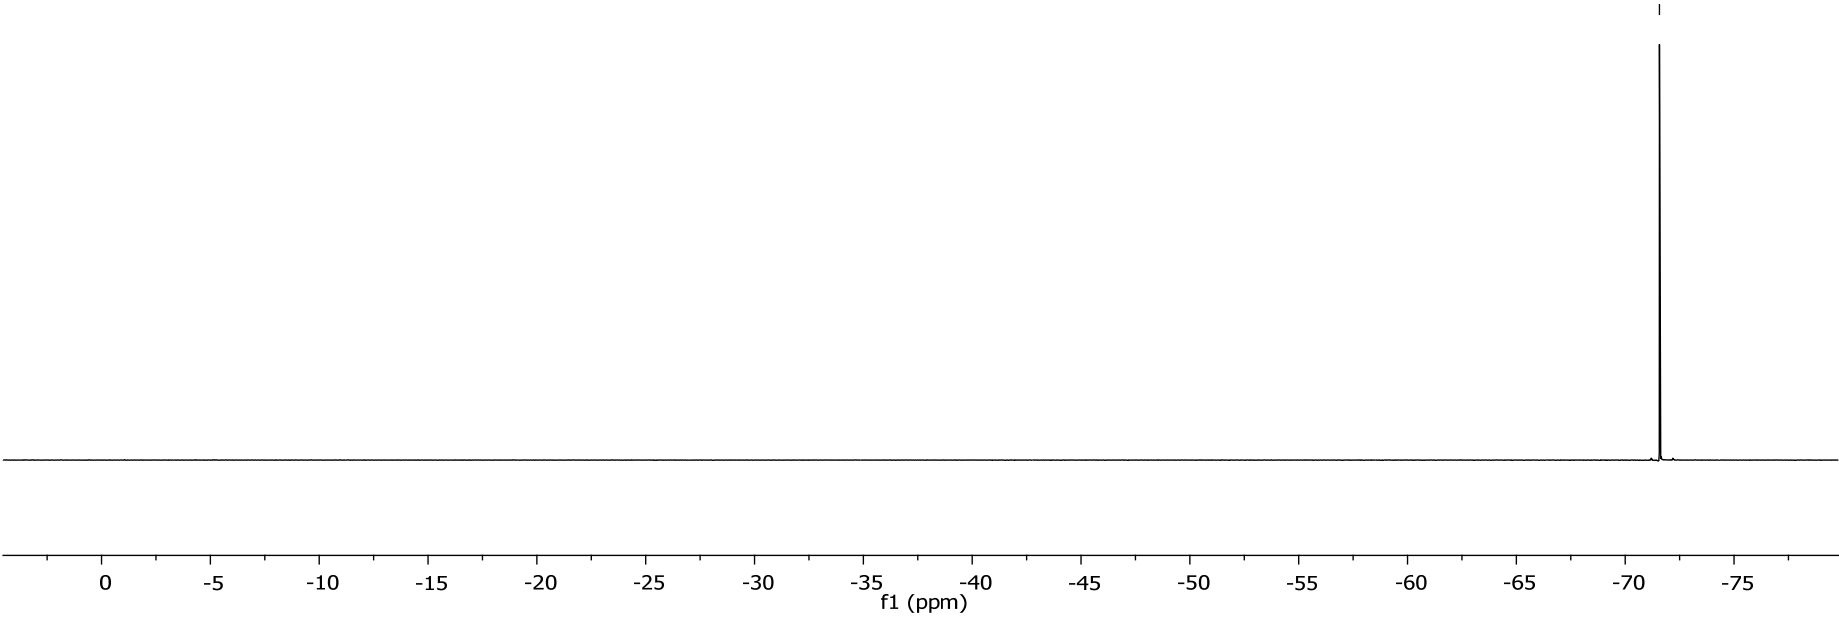

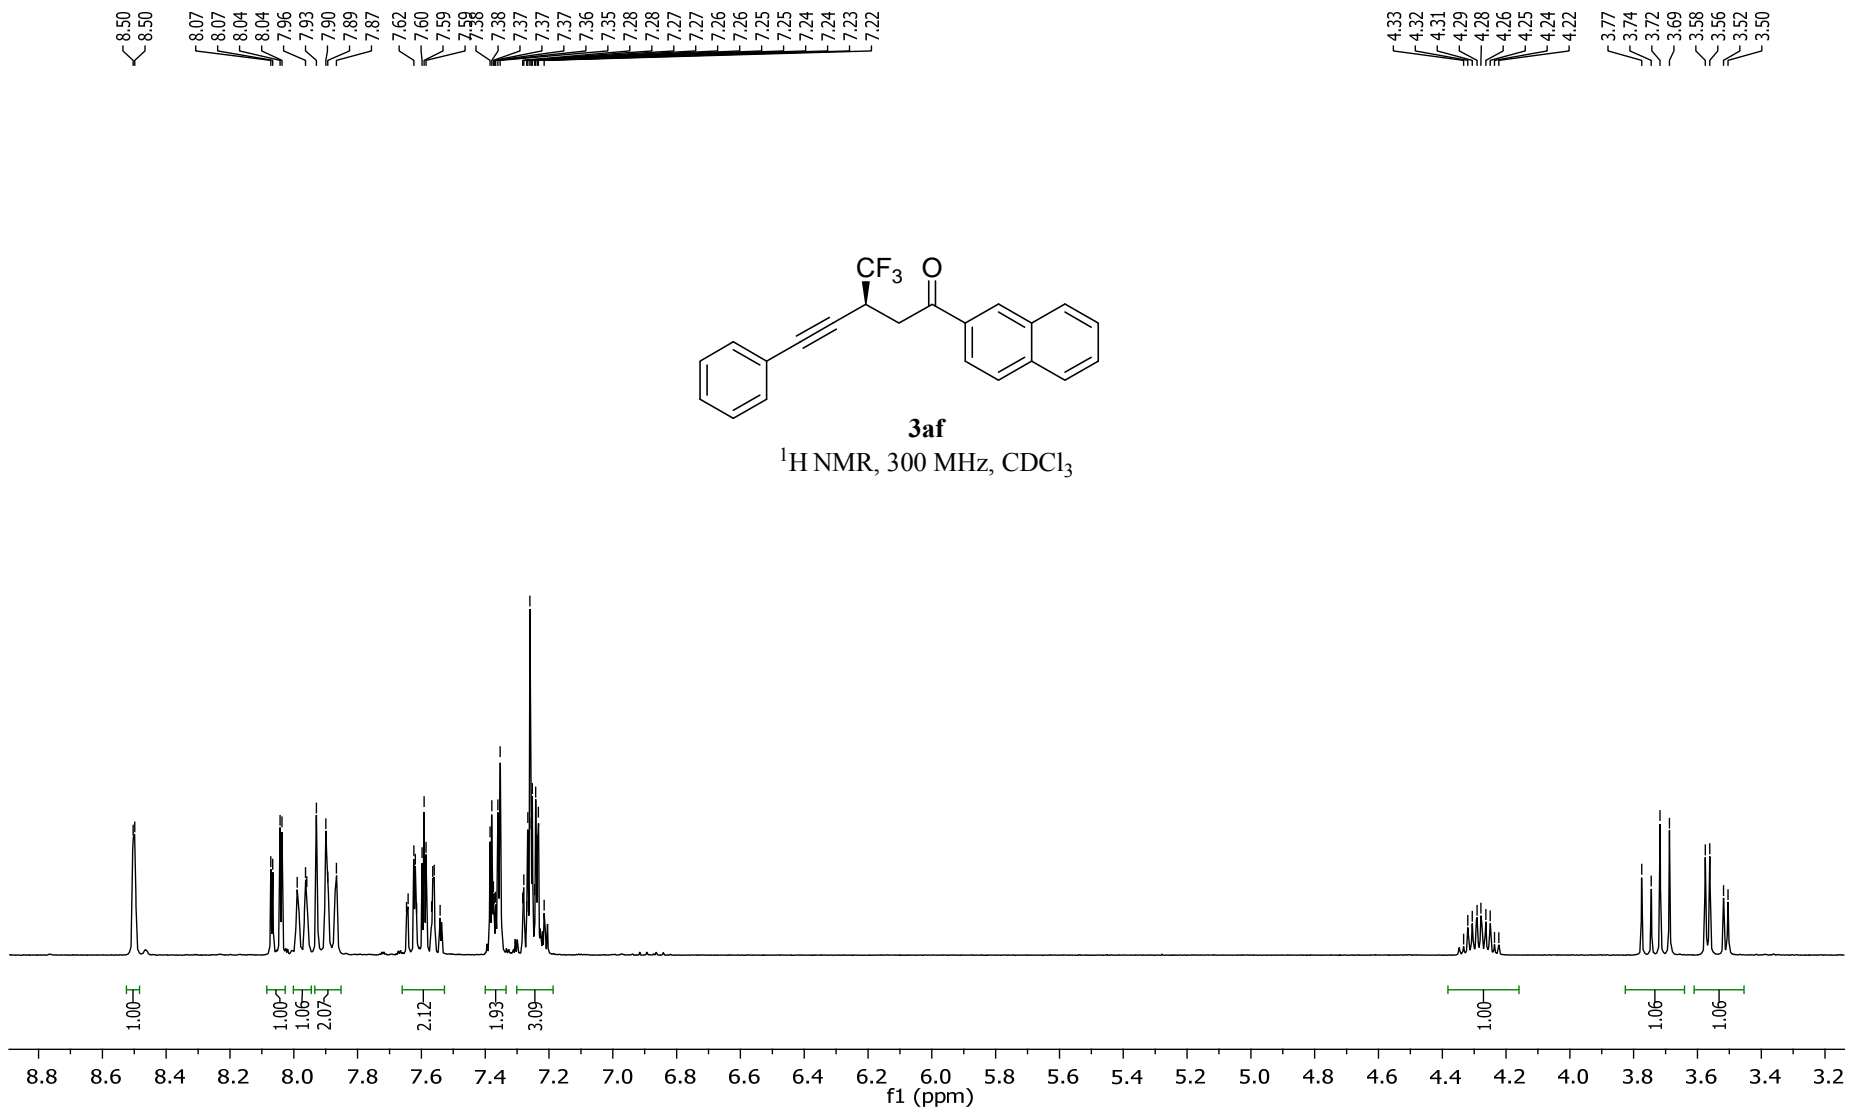

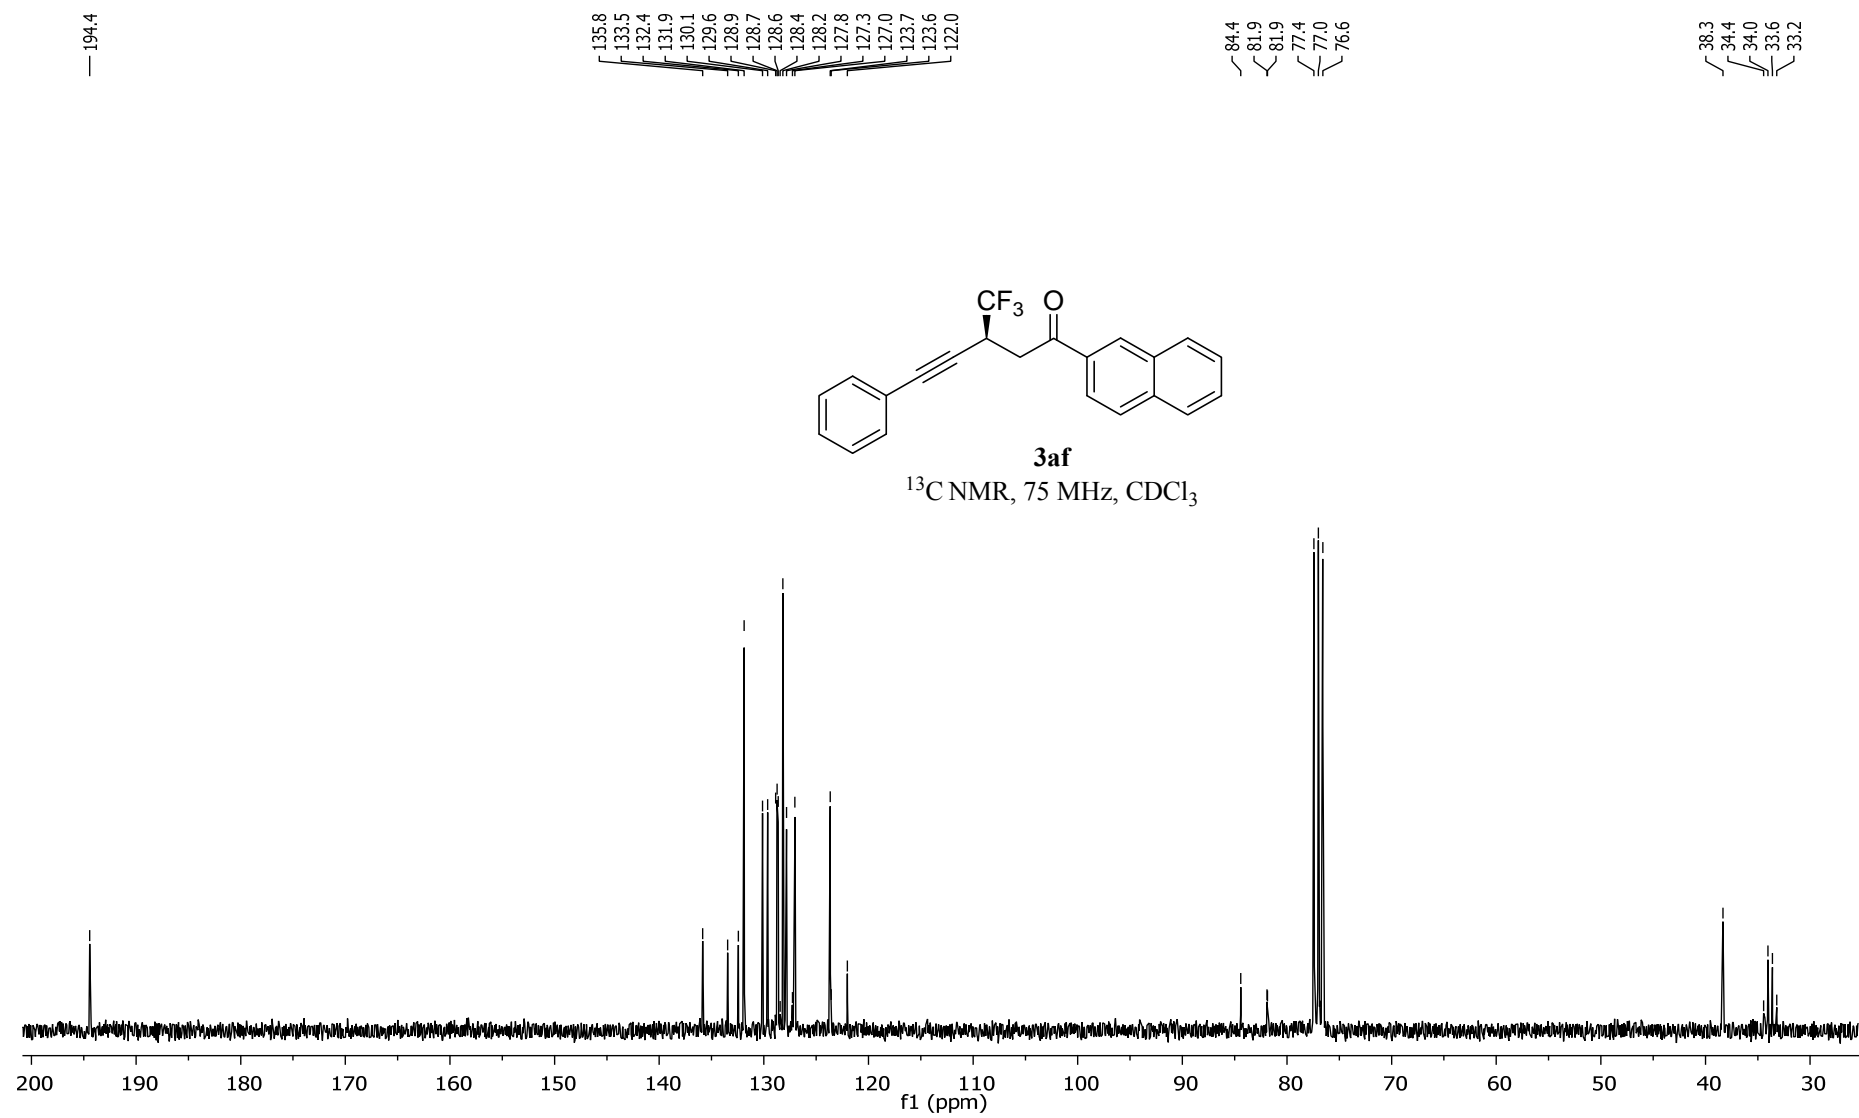

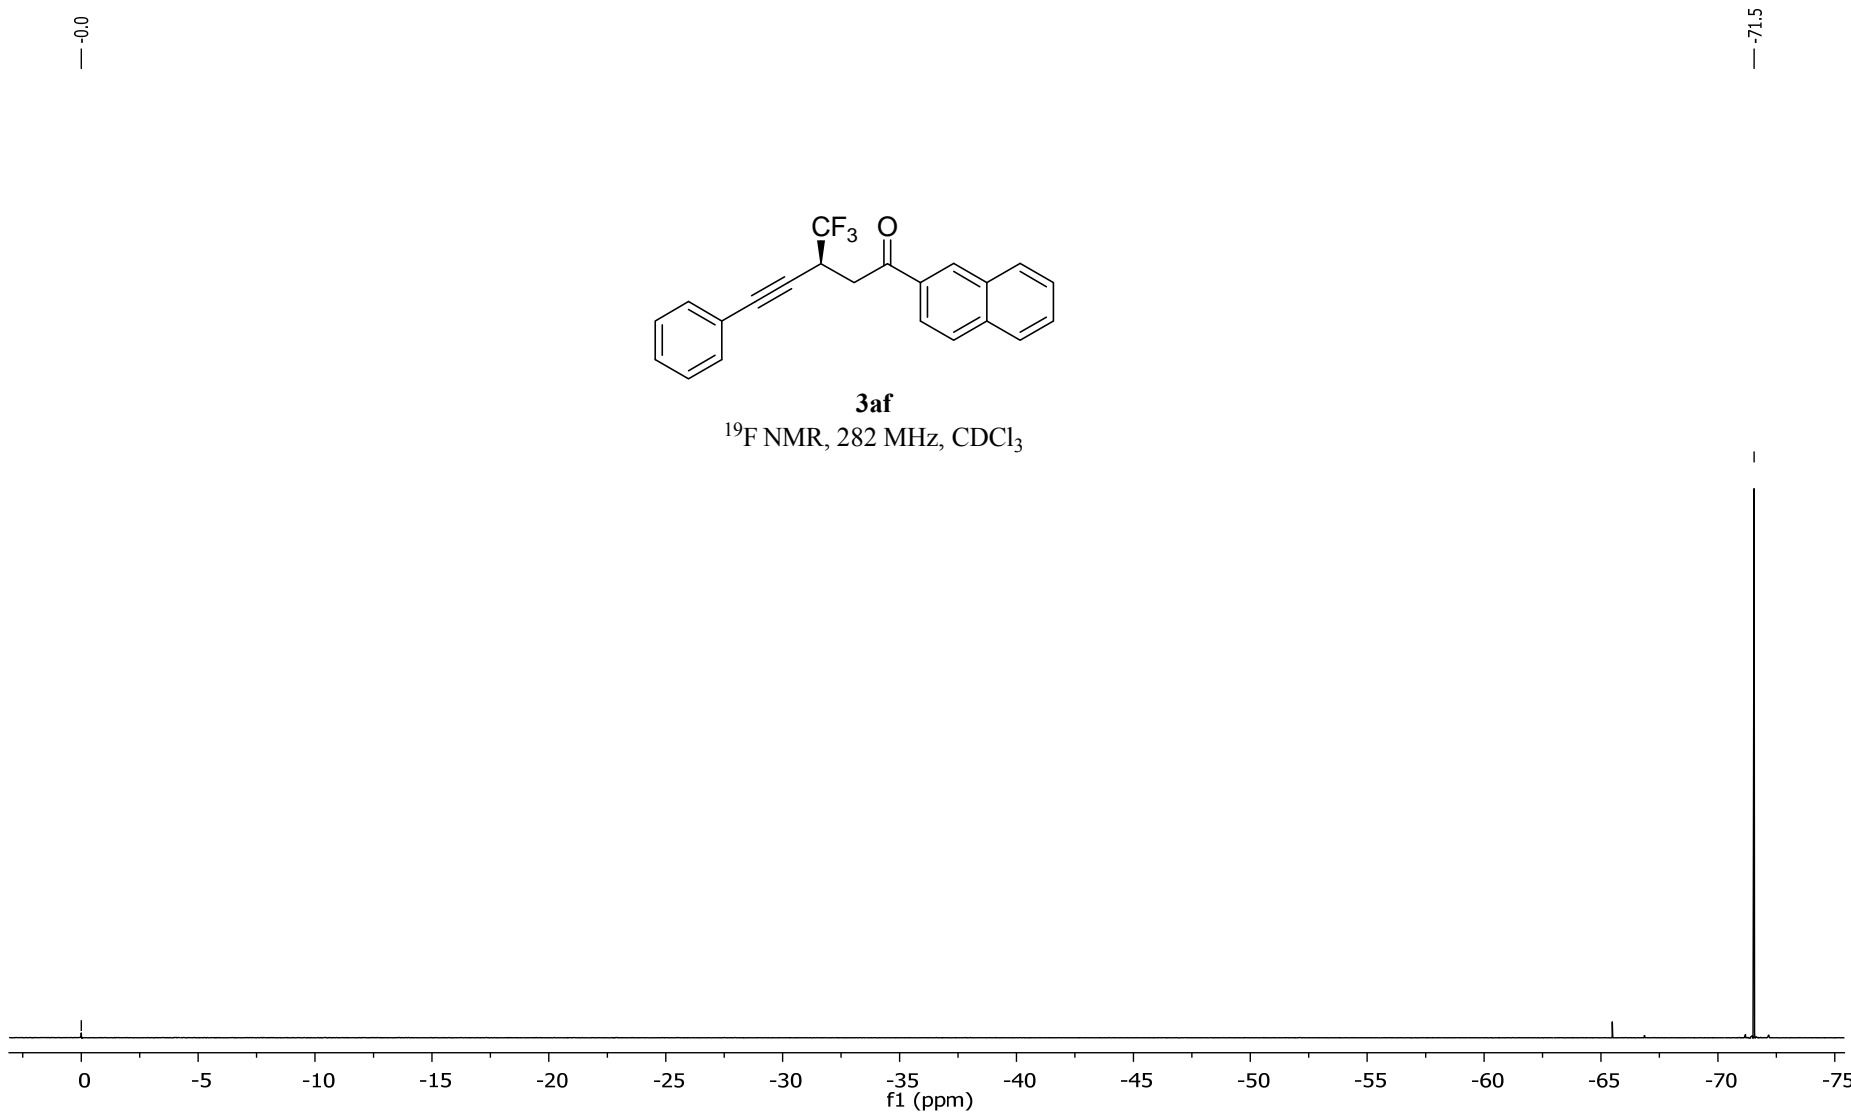

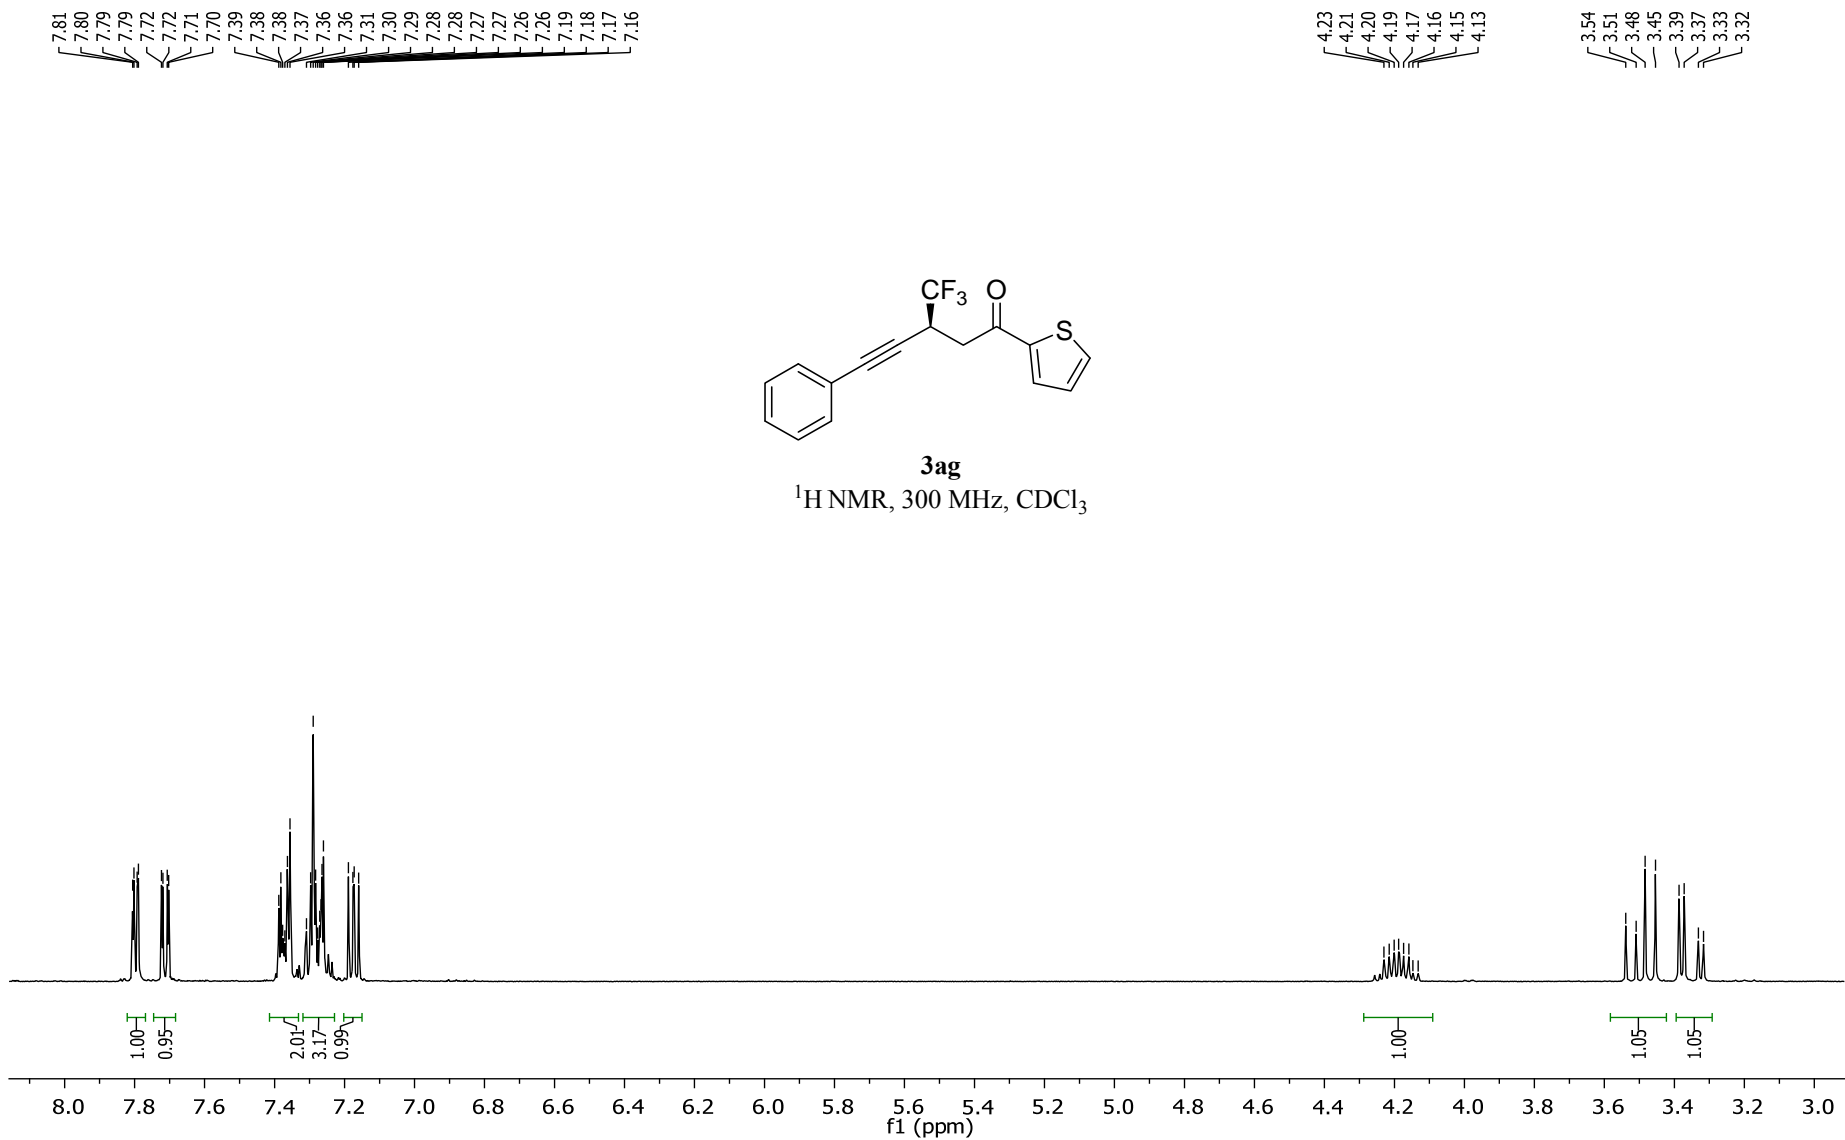

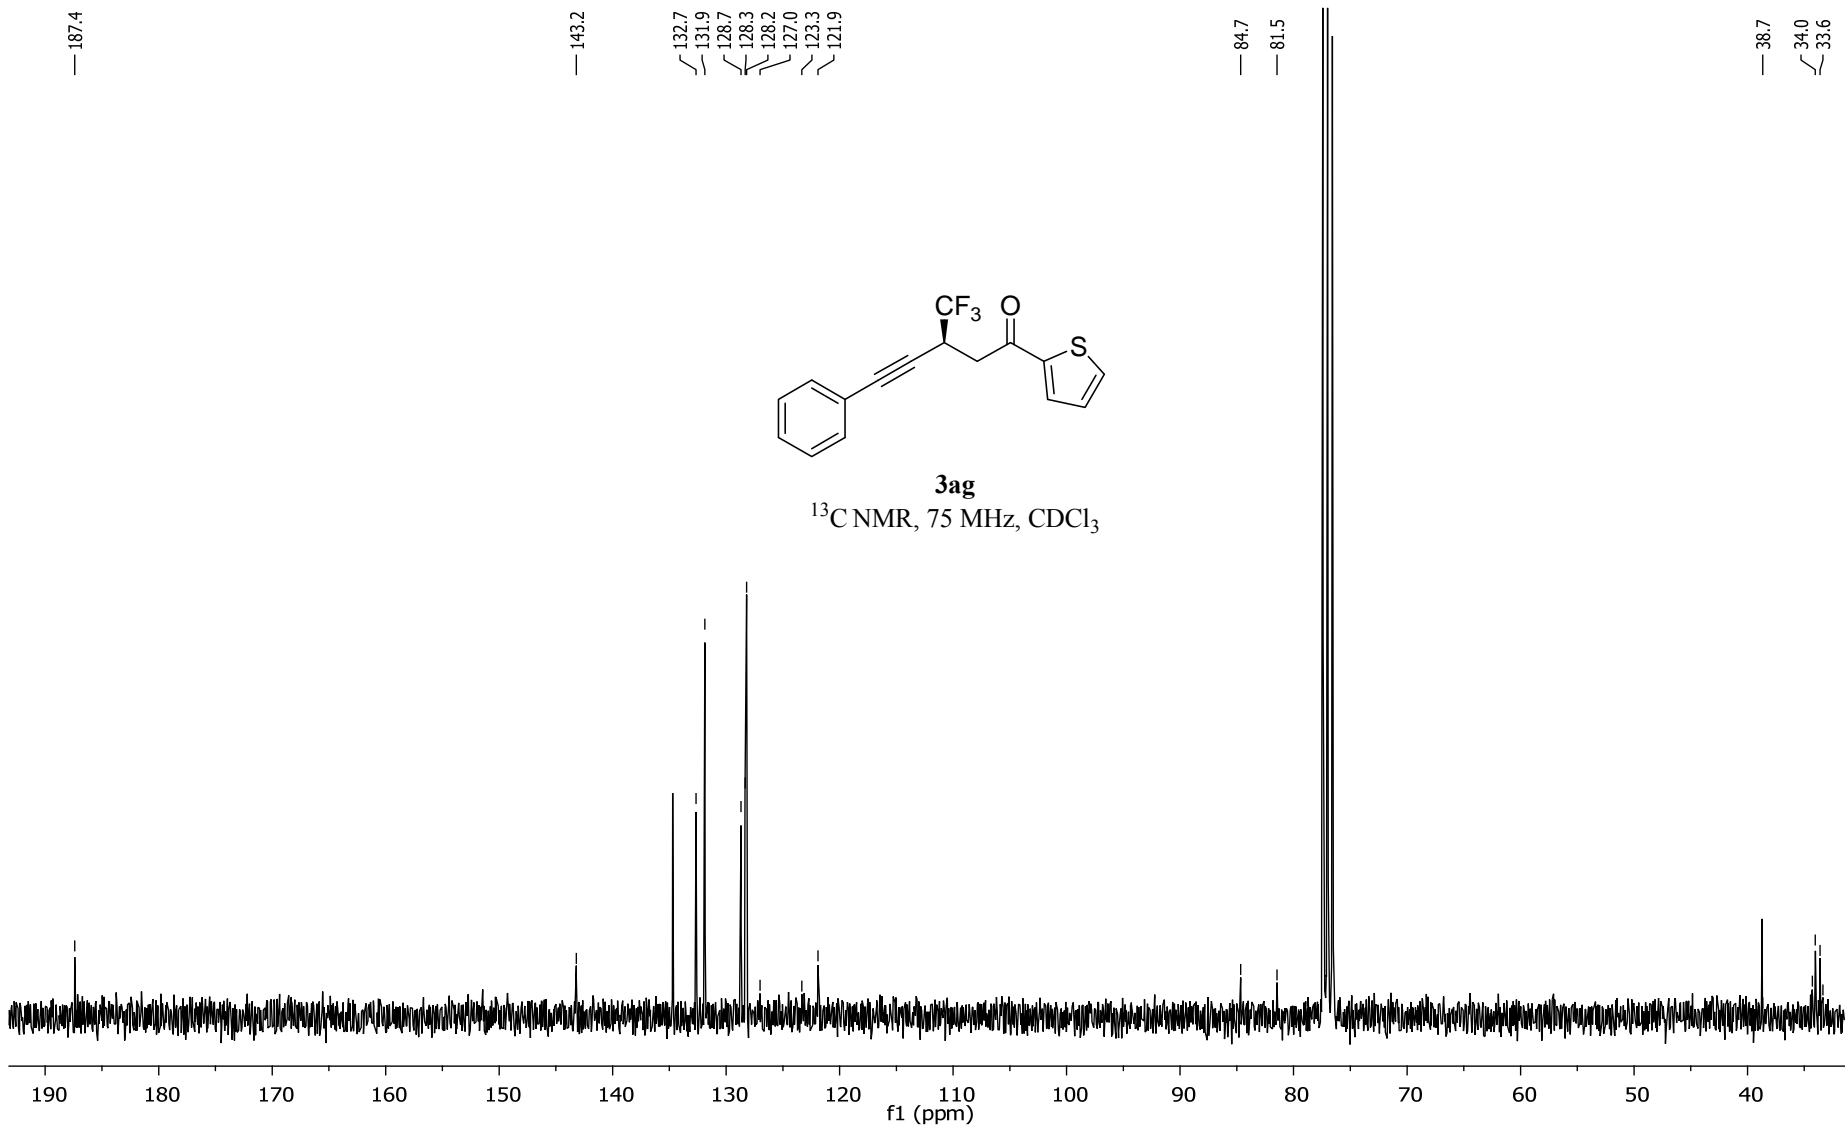

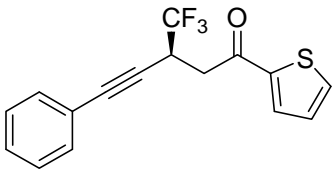

**3ag**

<sup>19</sup>F NMR, 282 MHz, CDCl<sub>3</sub>

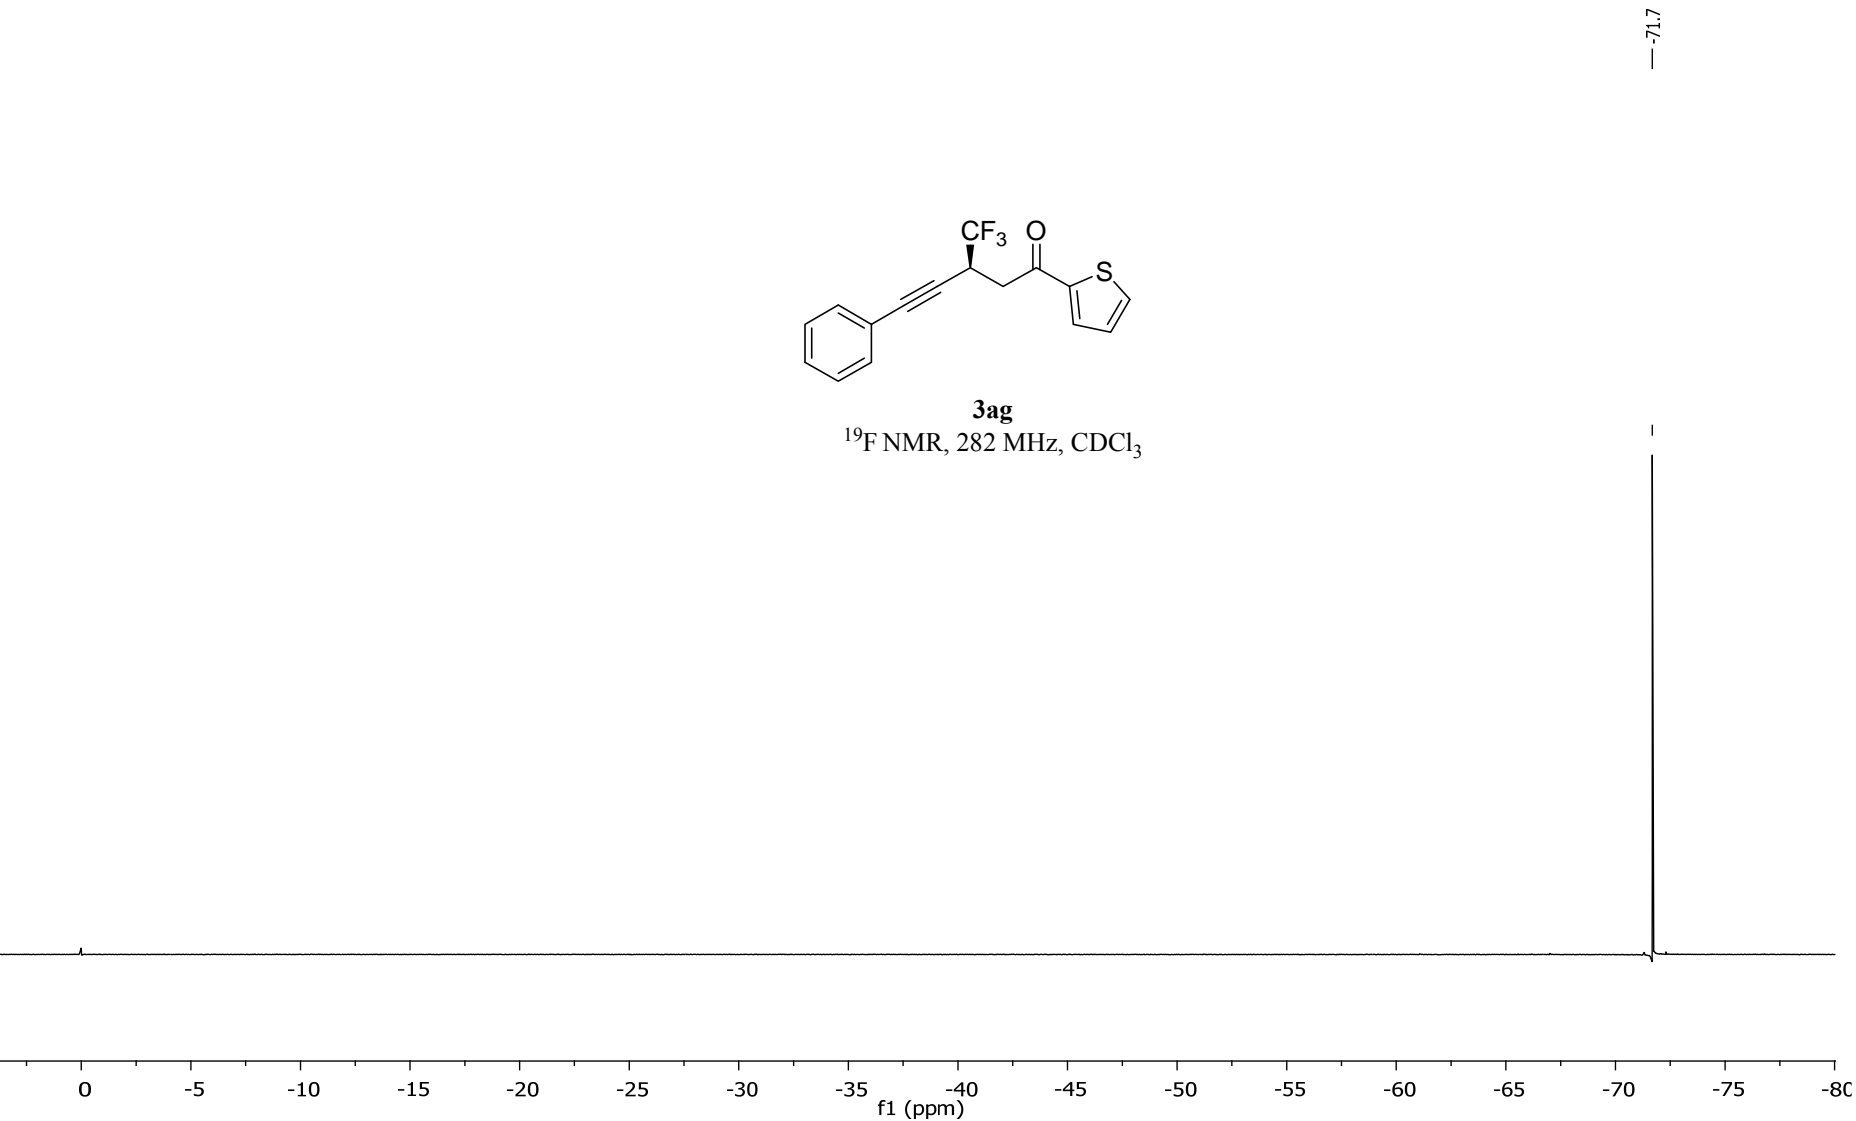

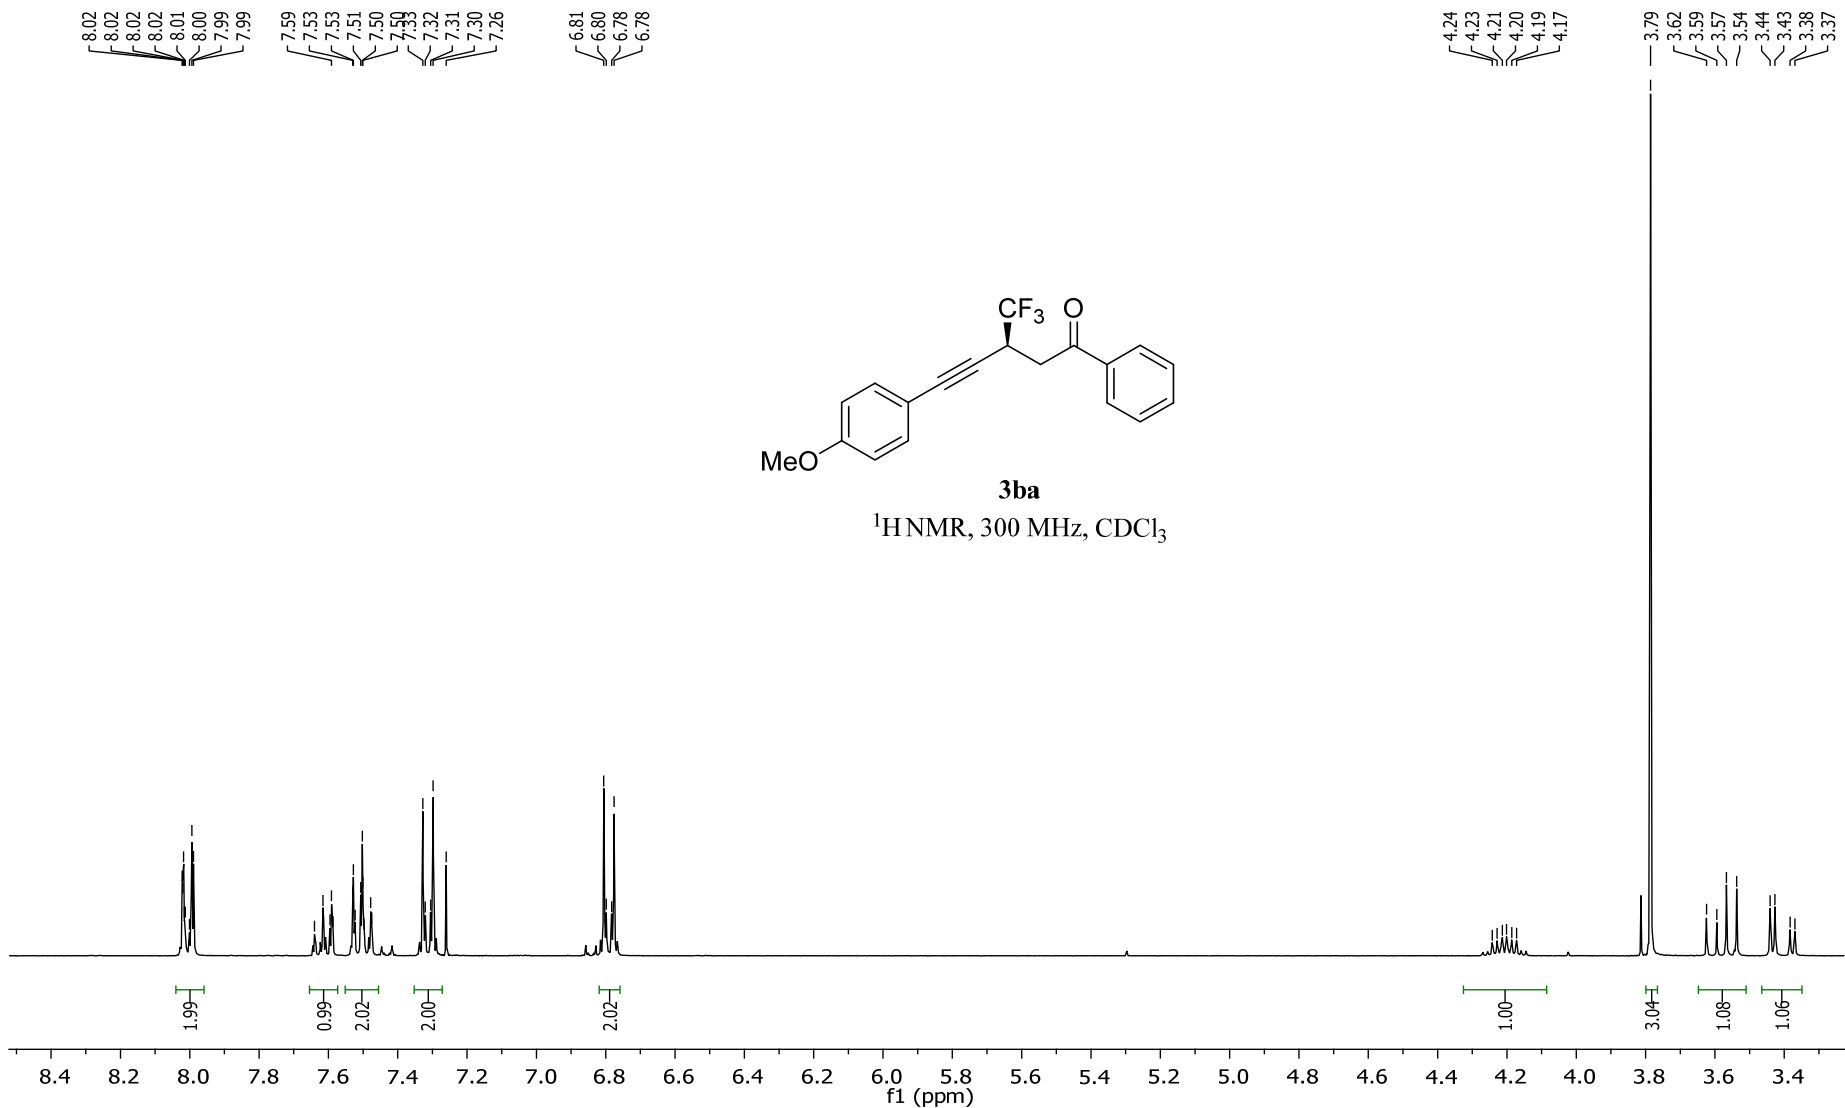

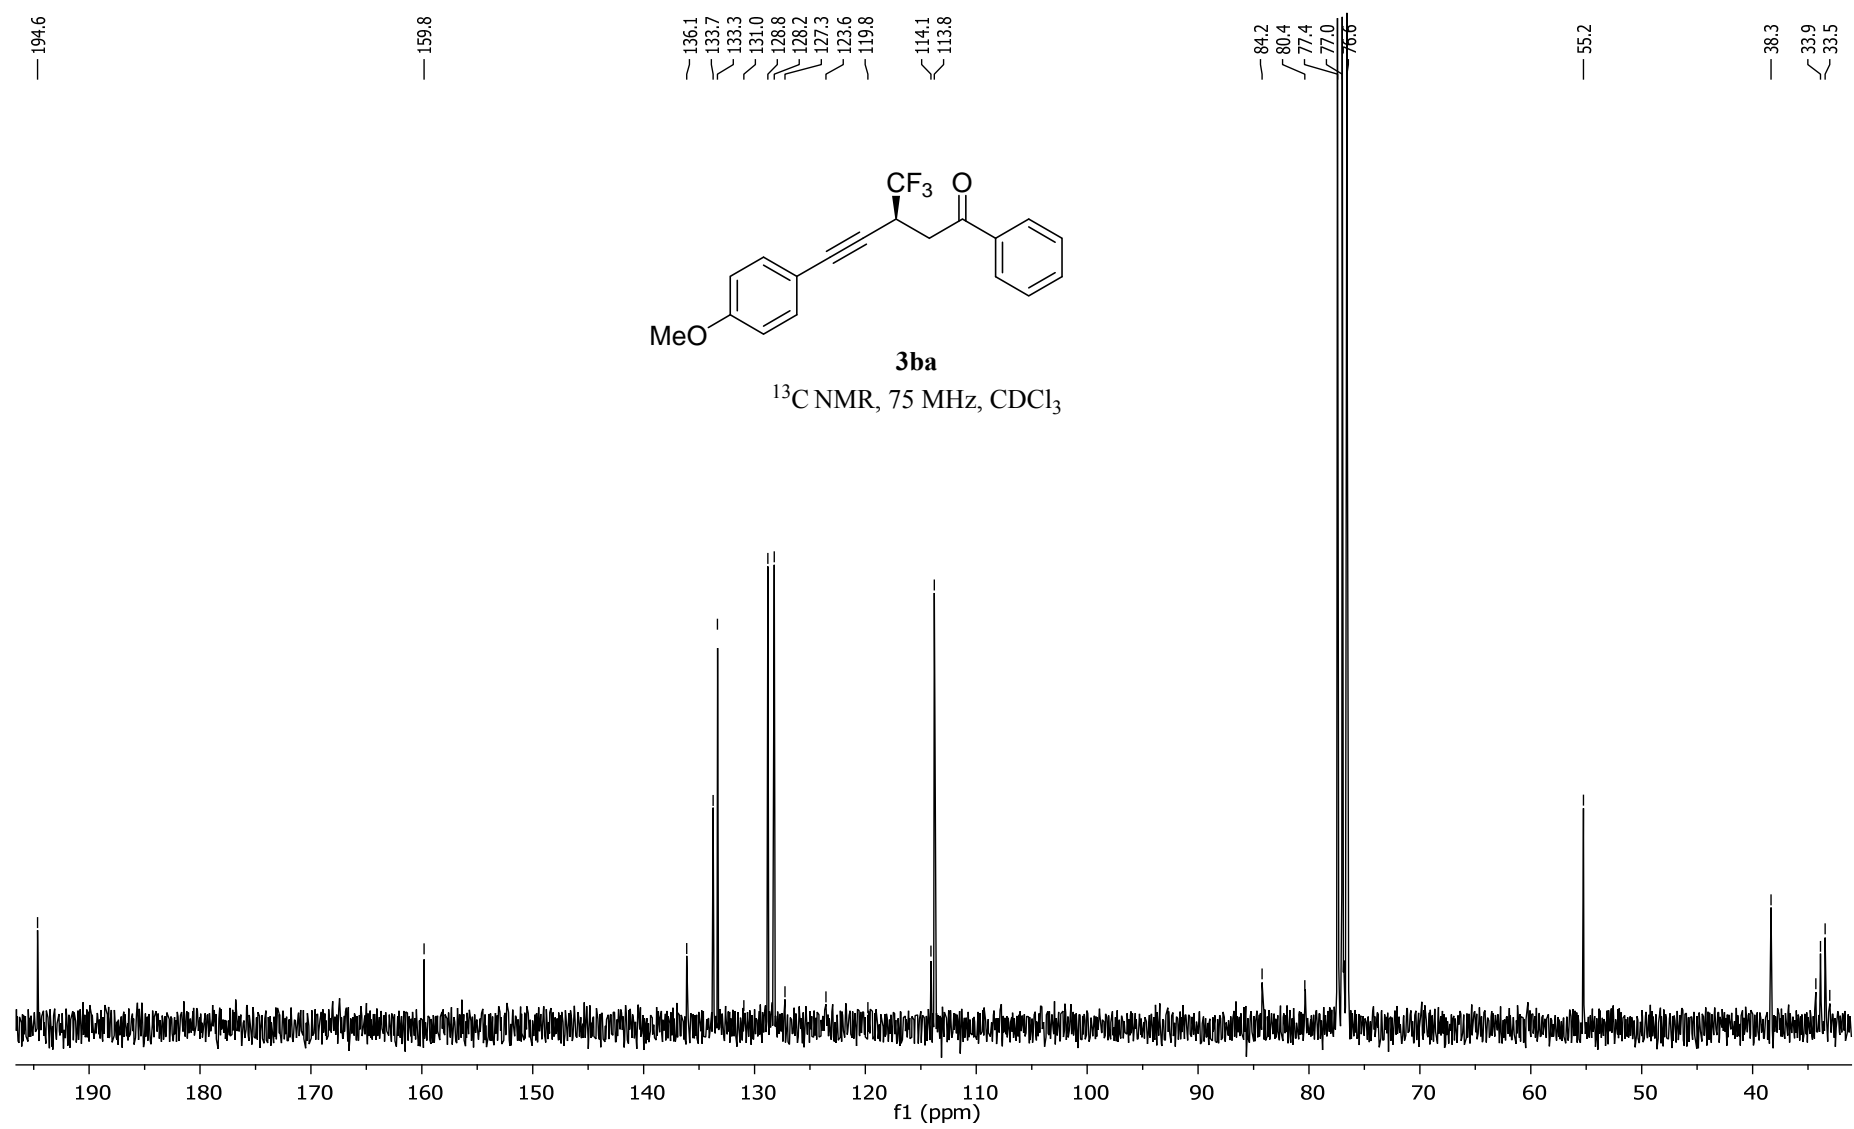

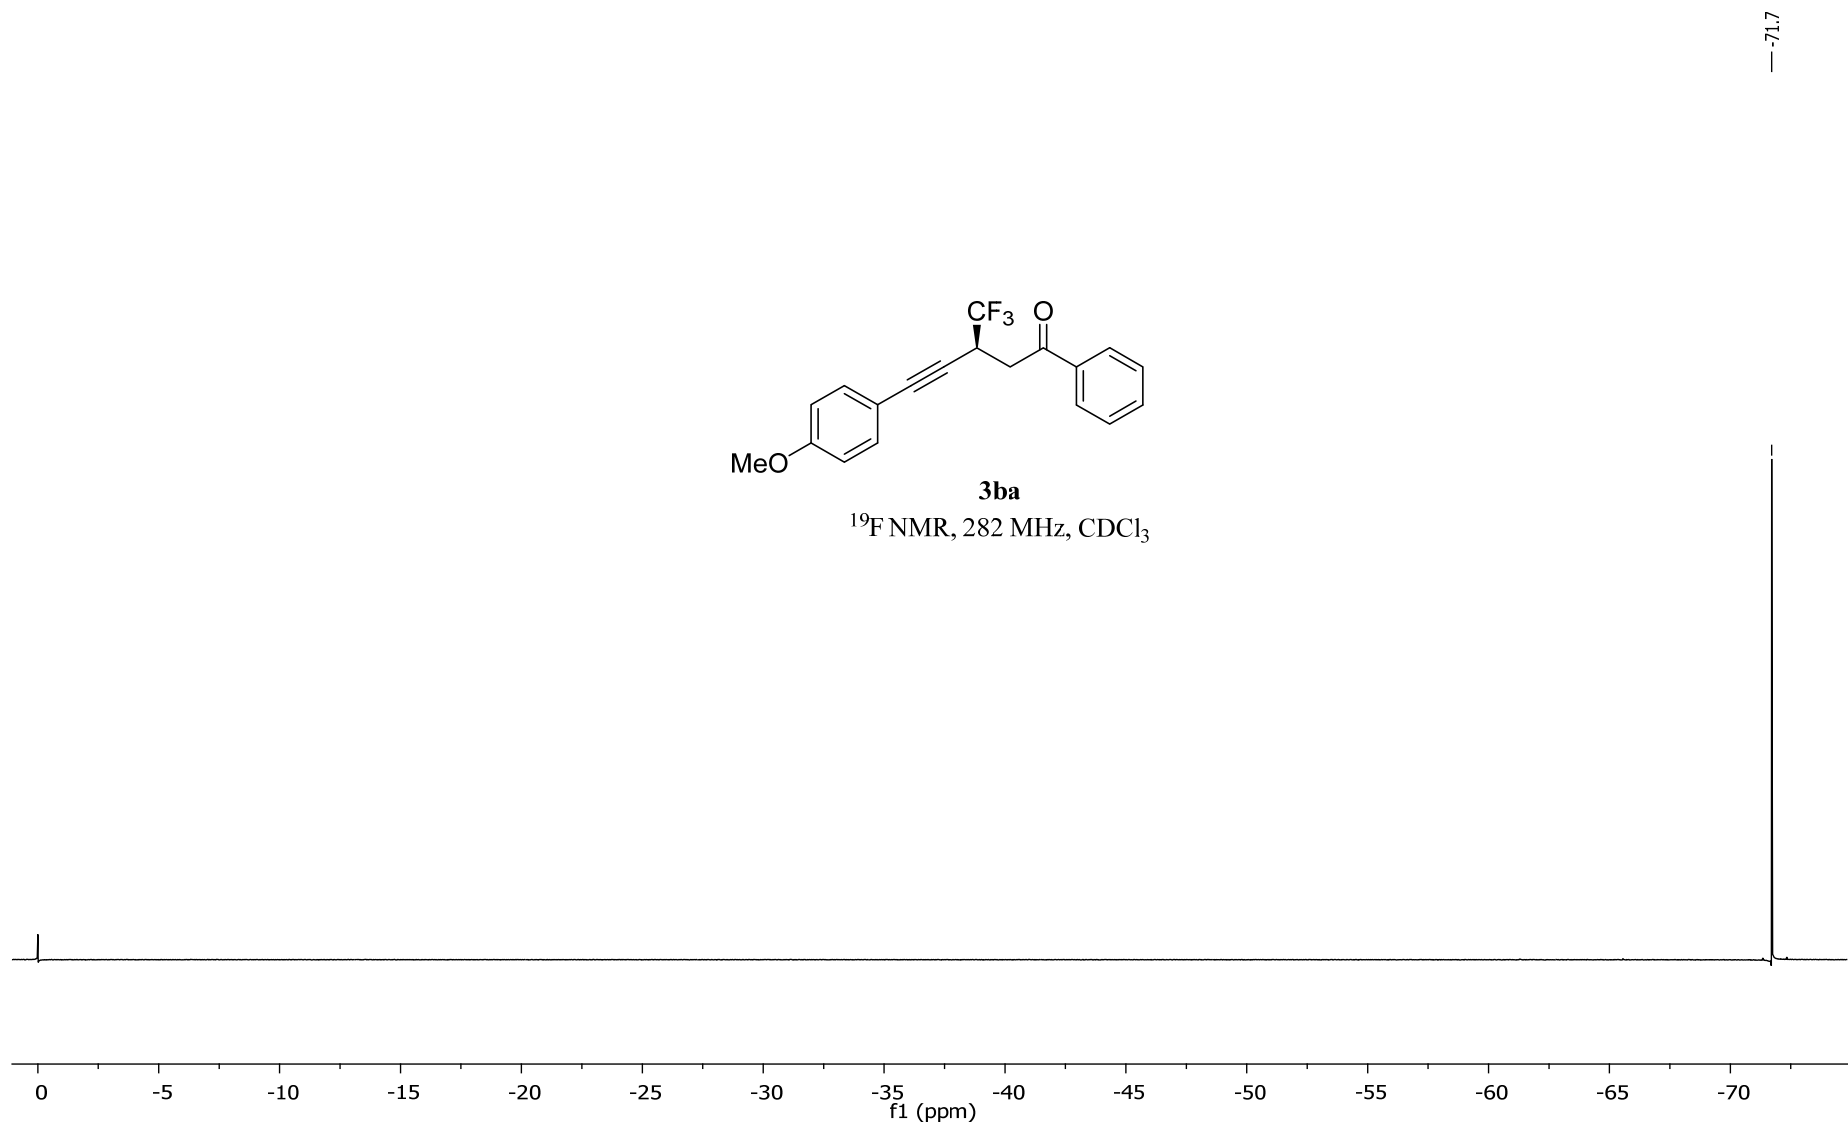

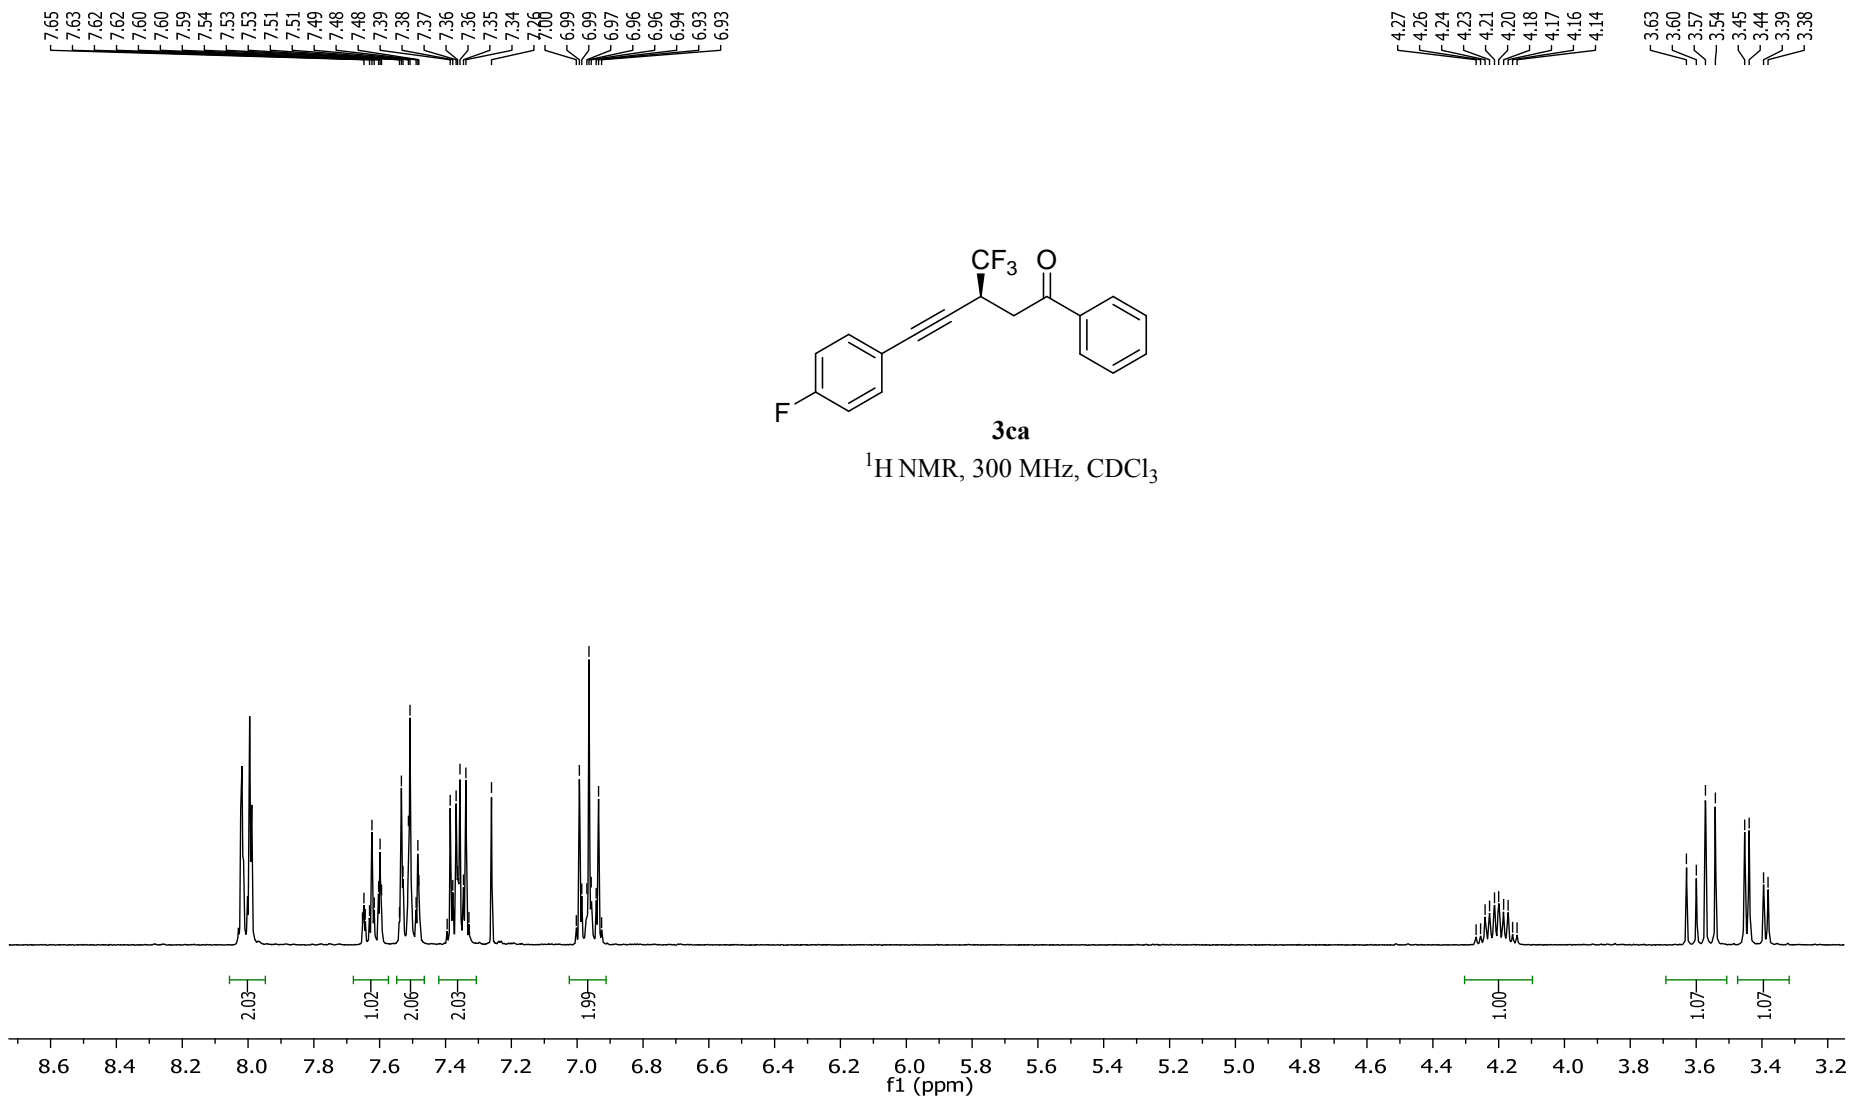

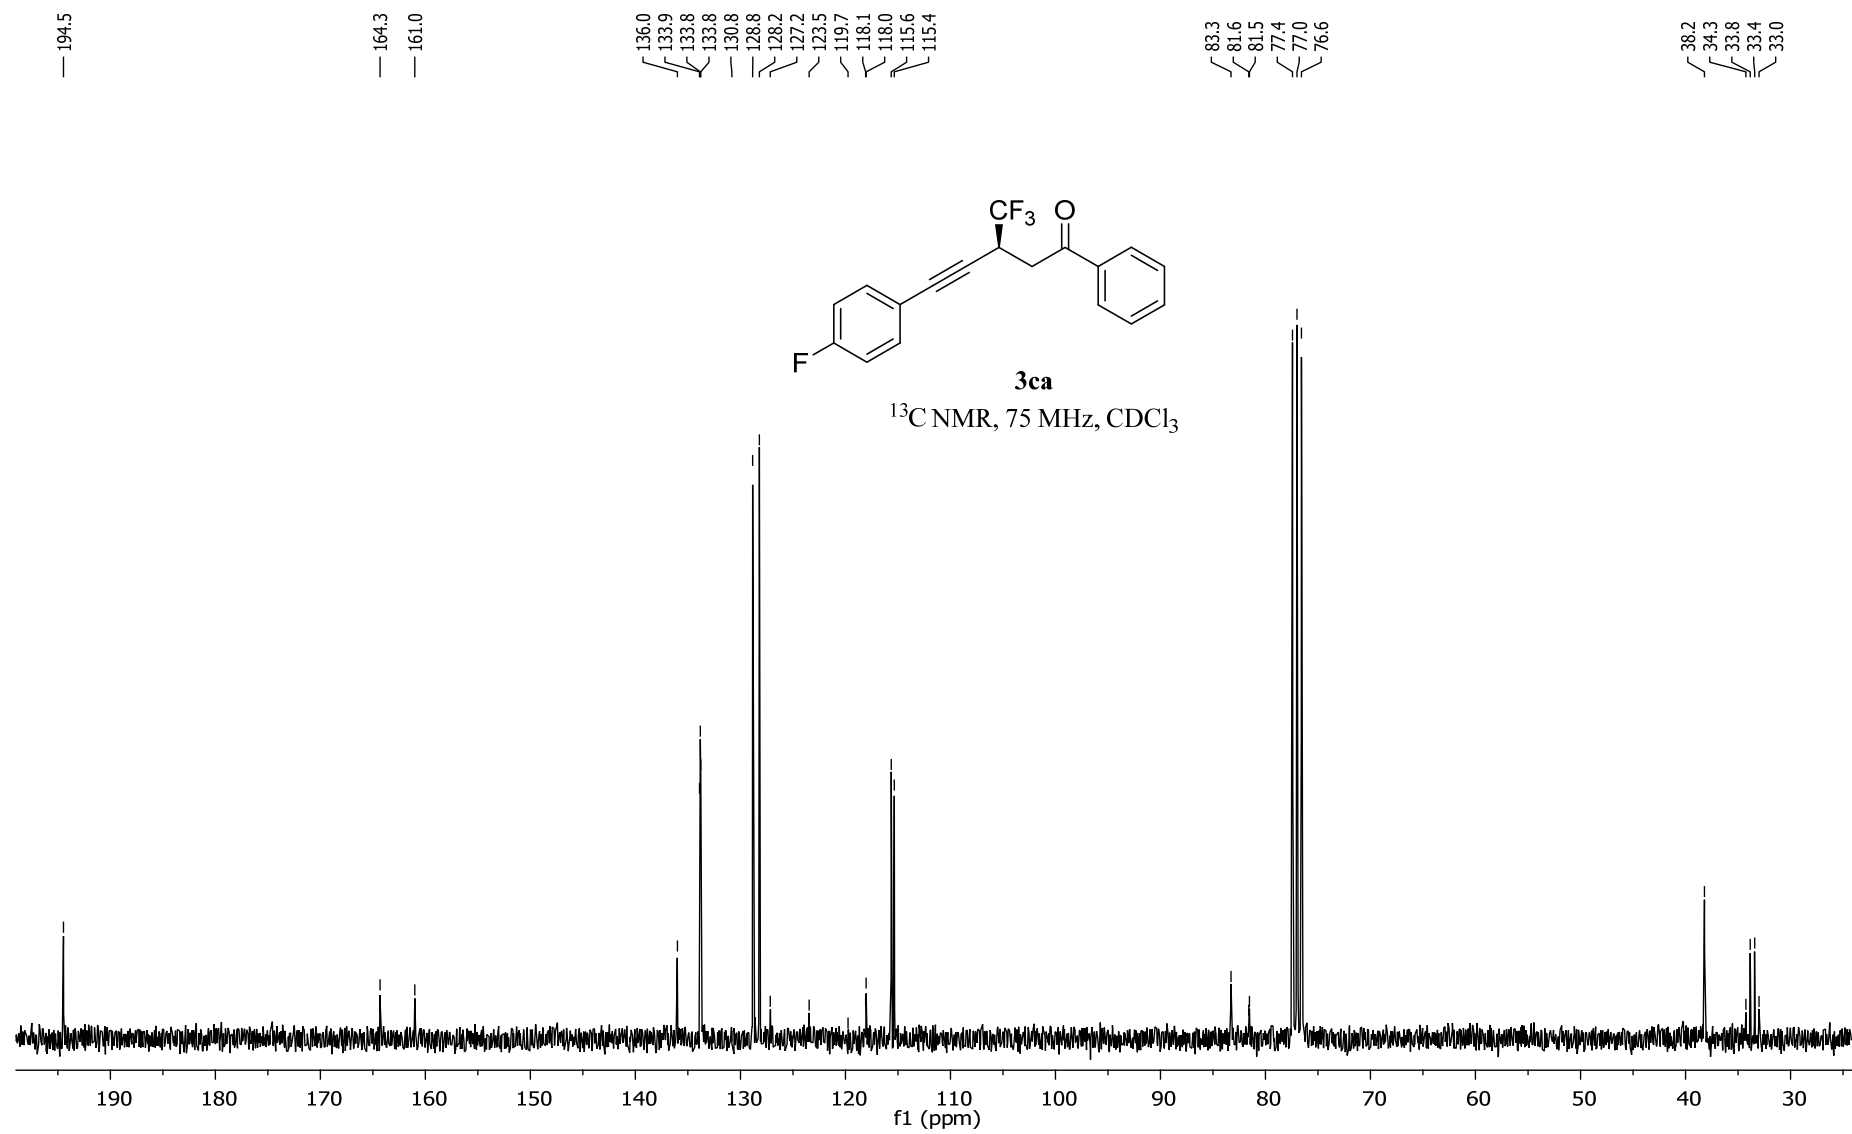

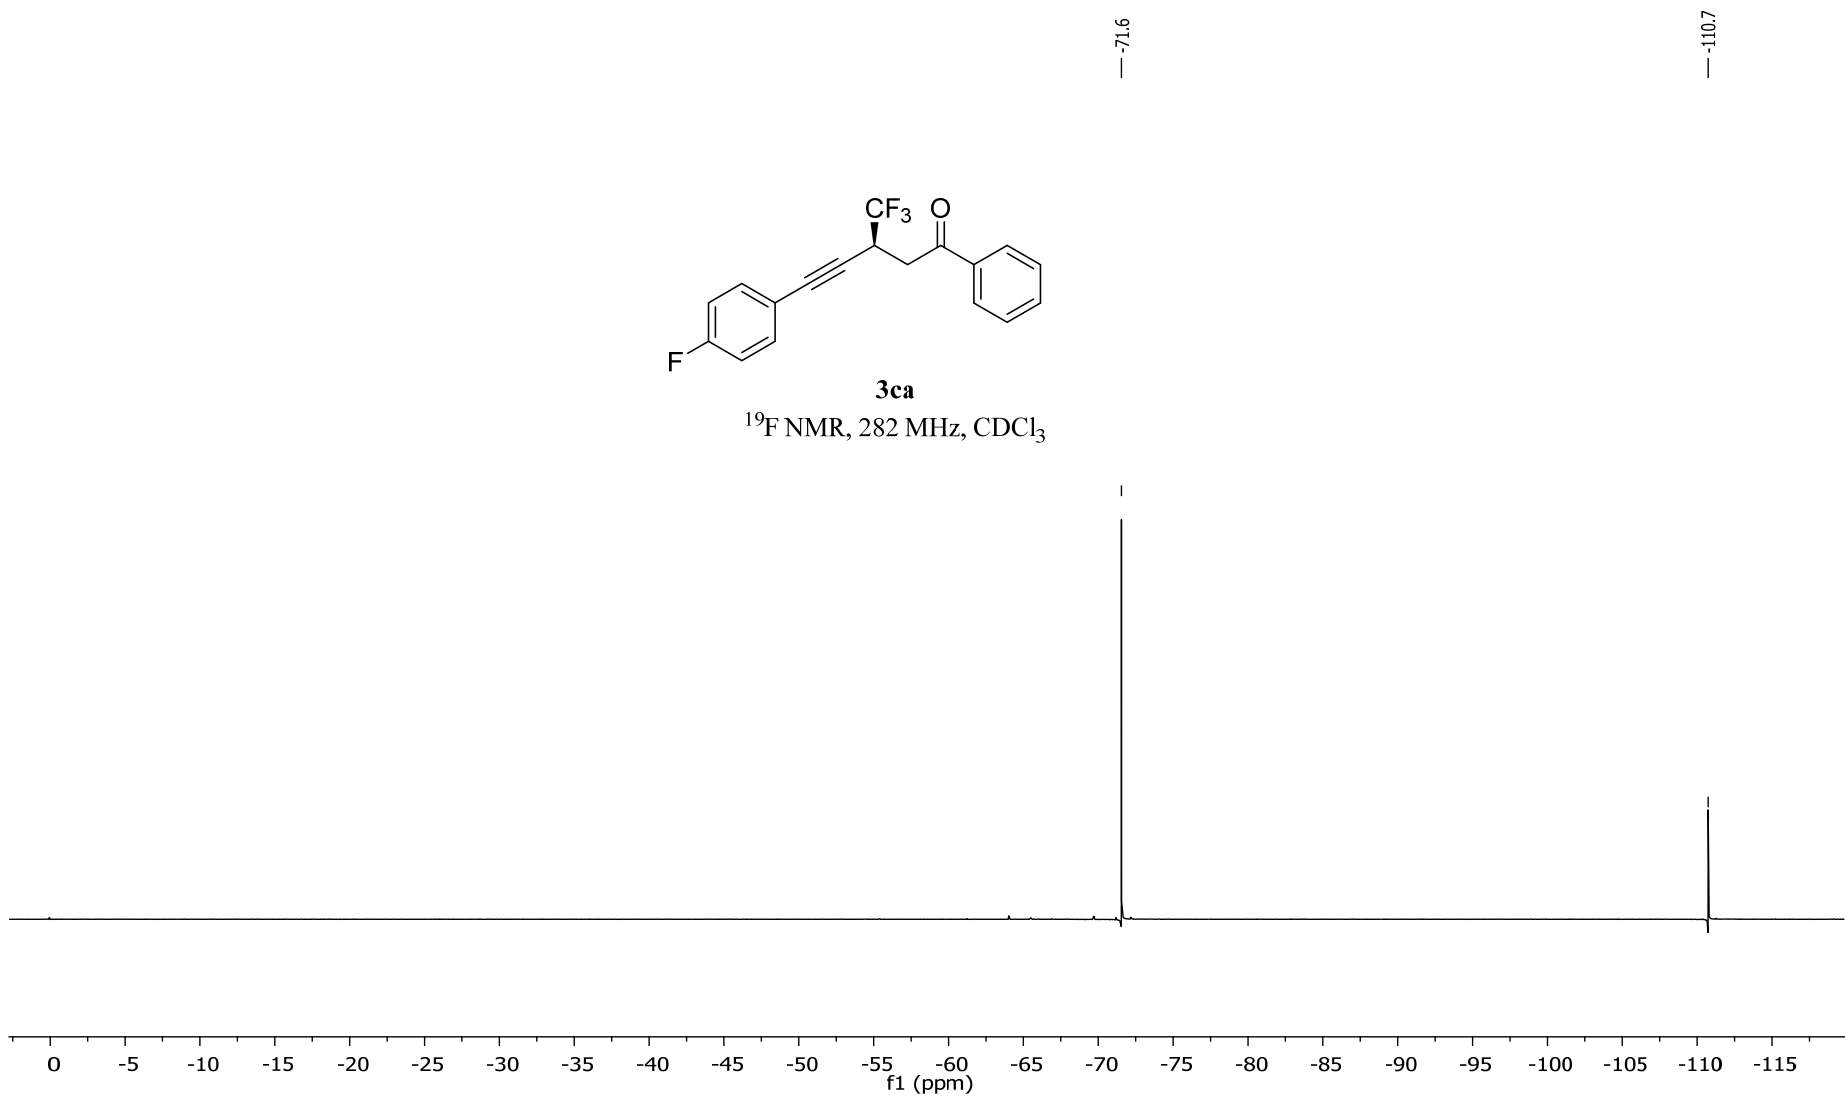

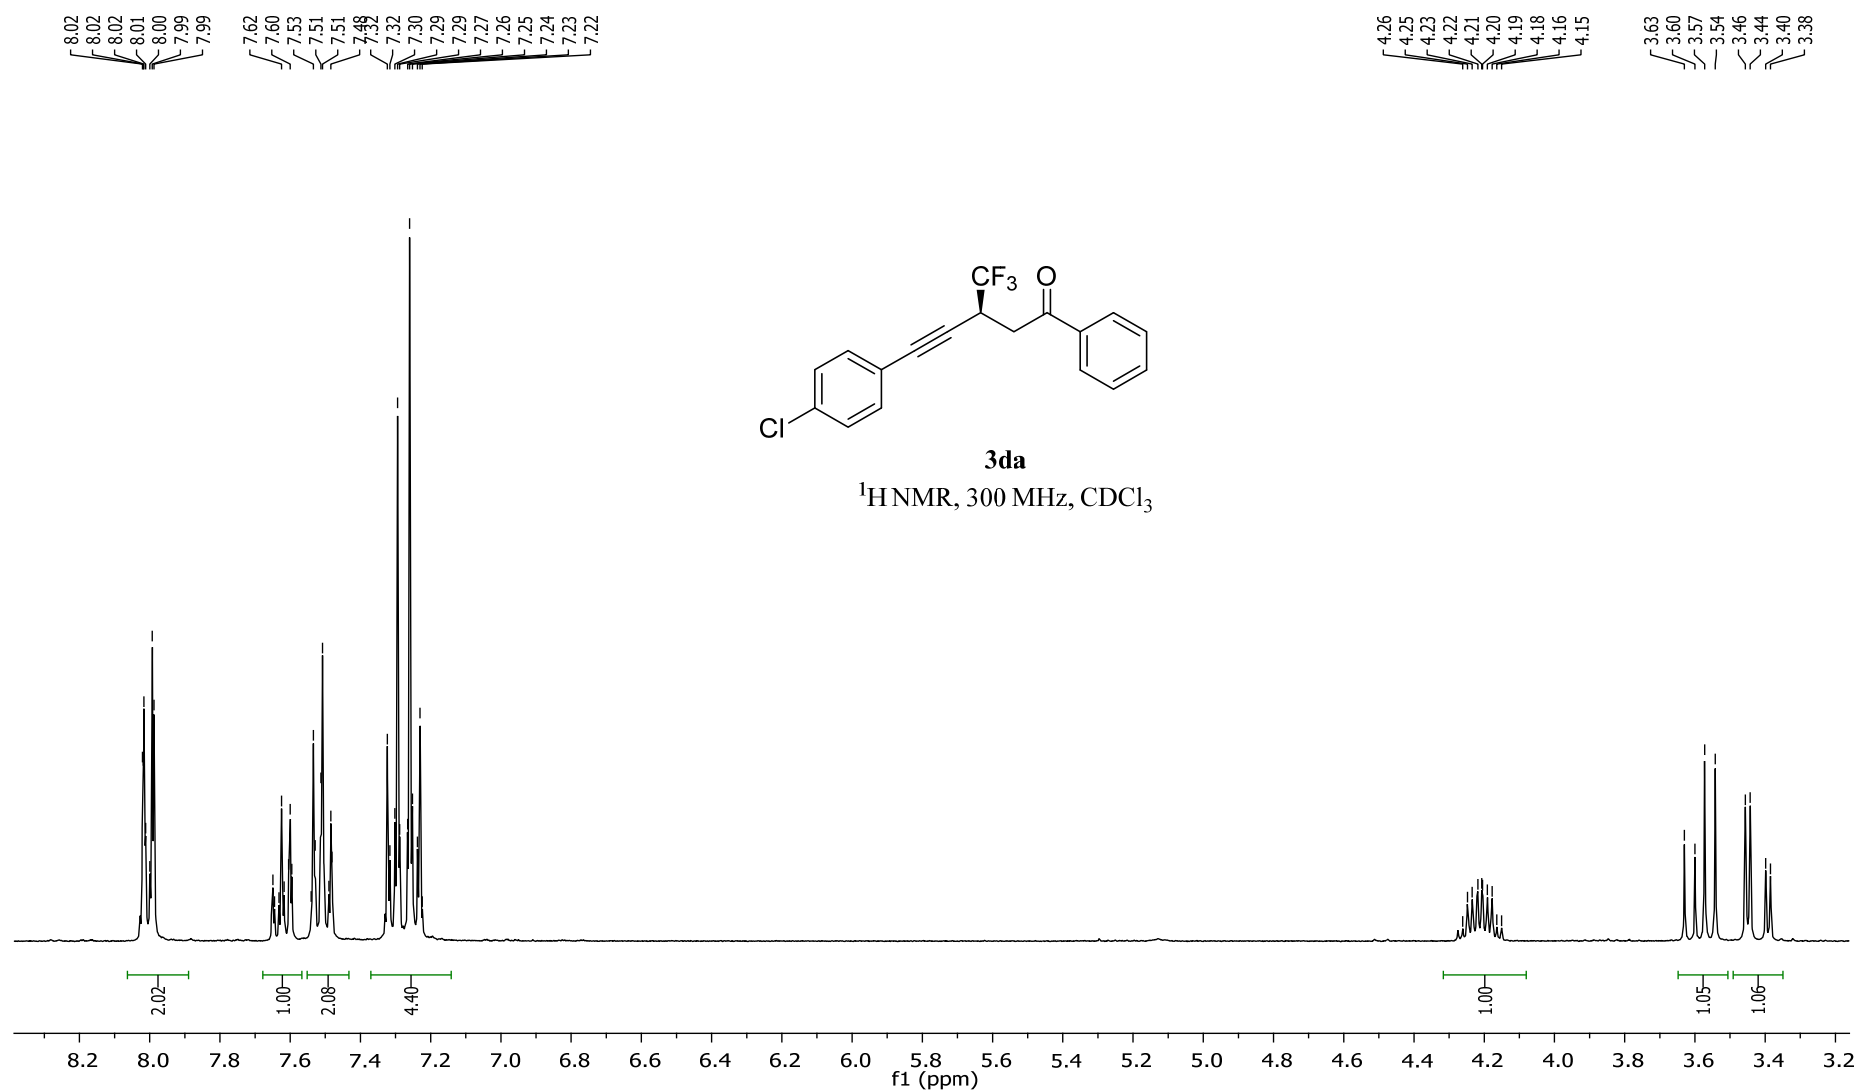

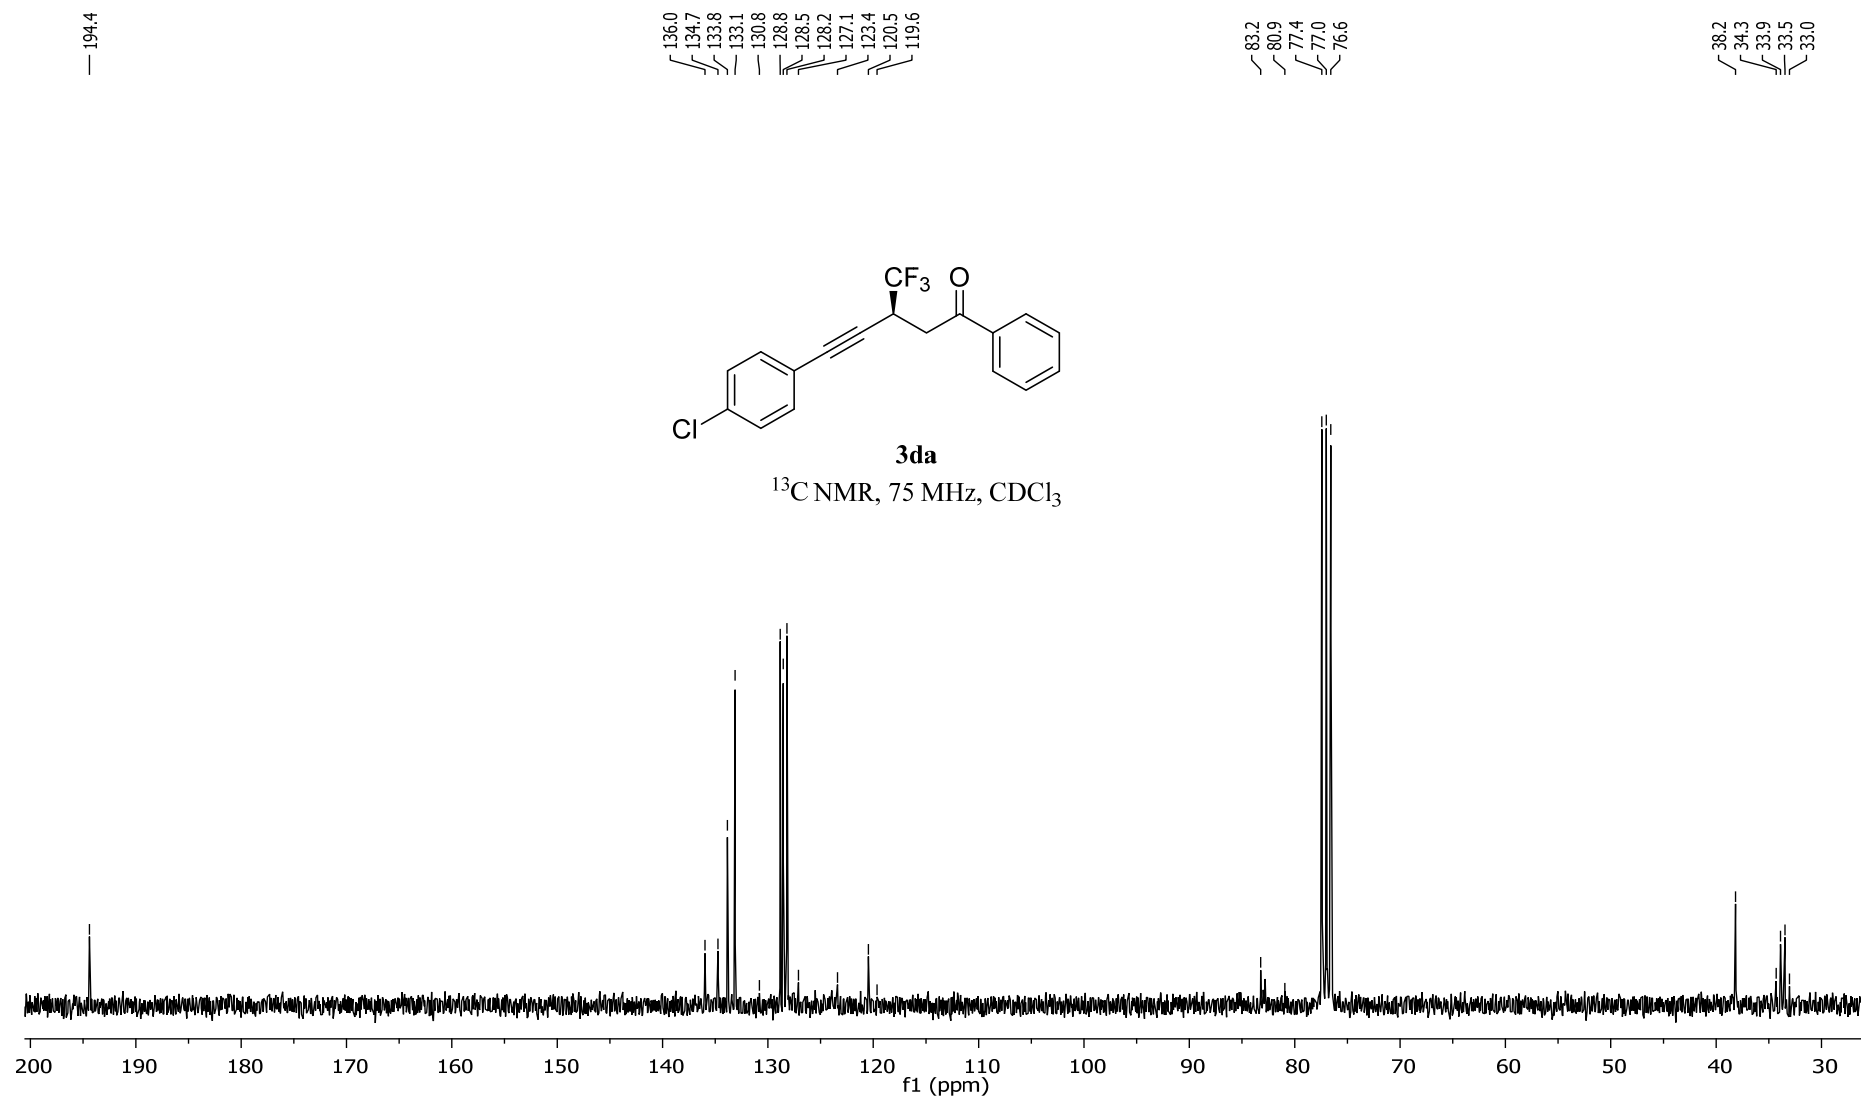

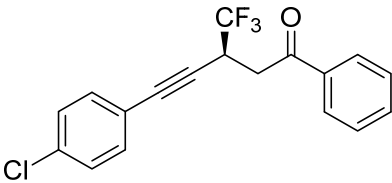

**3da**

<sup>19</sup>F NMR, 282 MHz, CDCl<sub>3</sub>

— -71.5

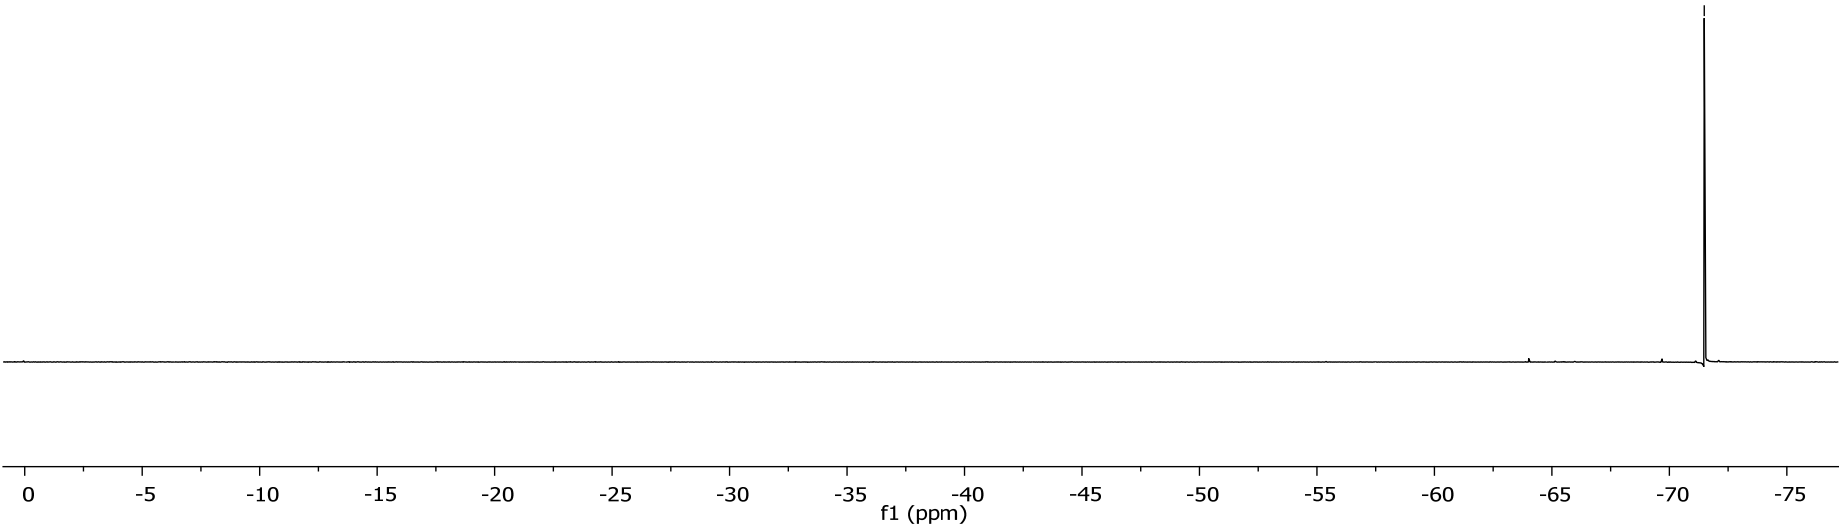

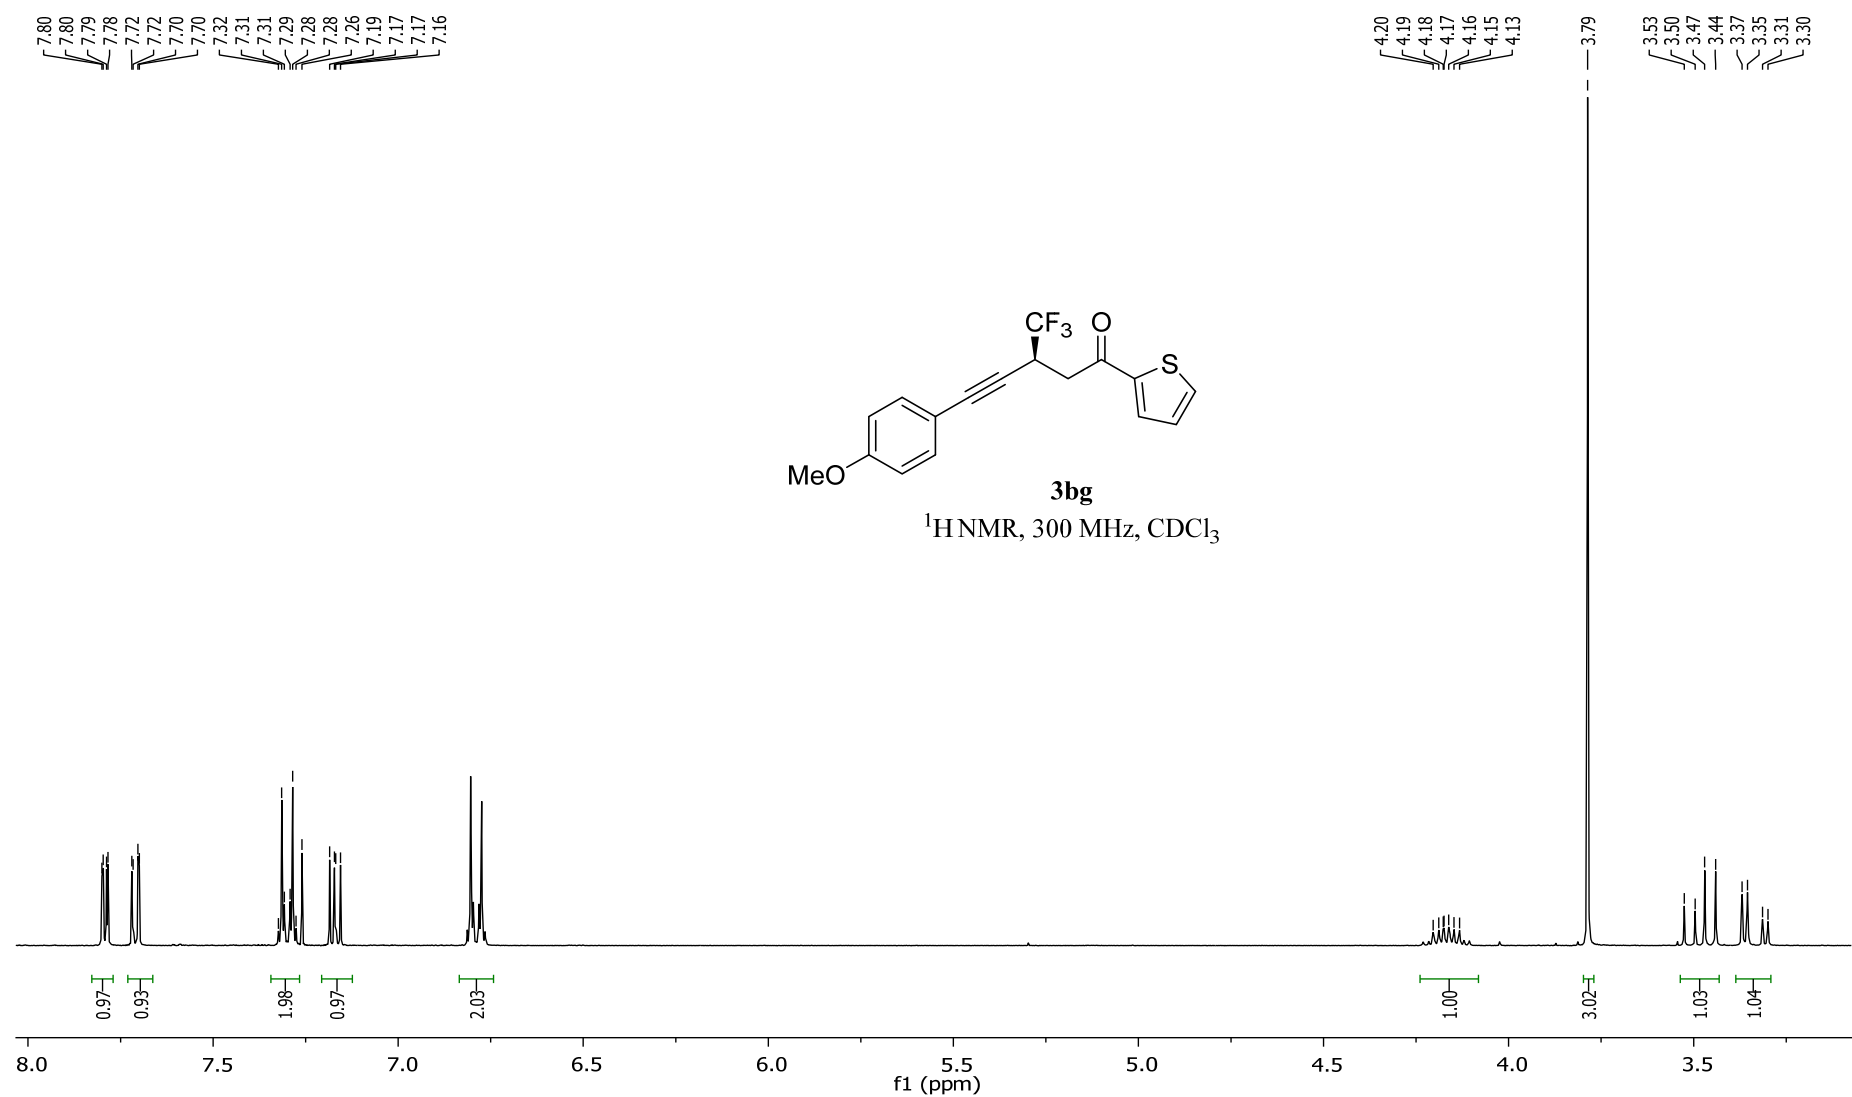

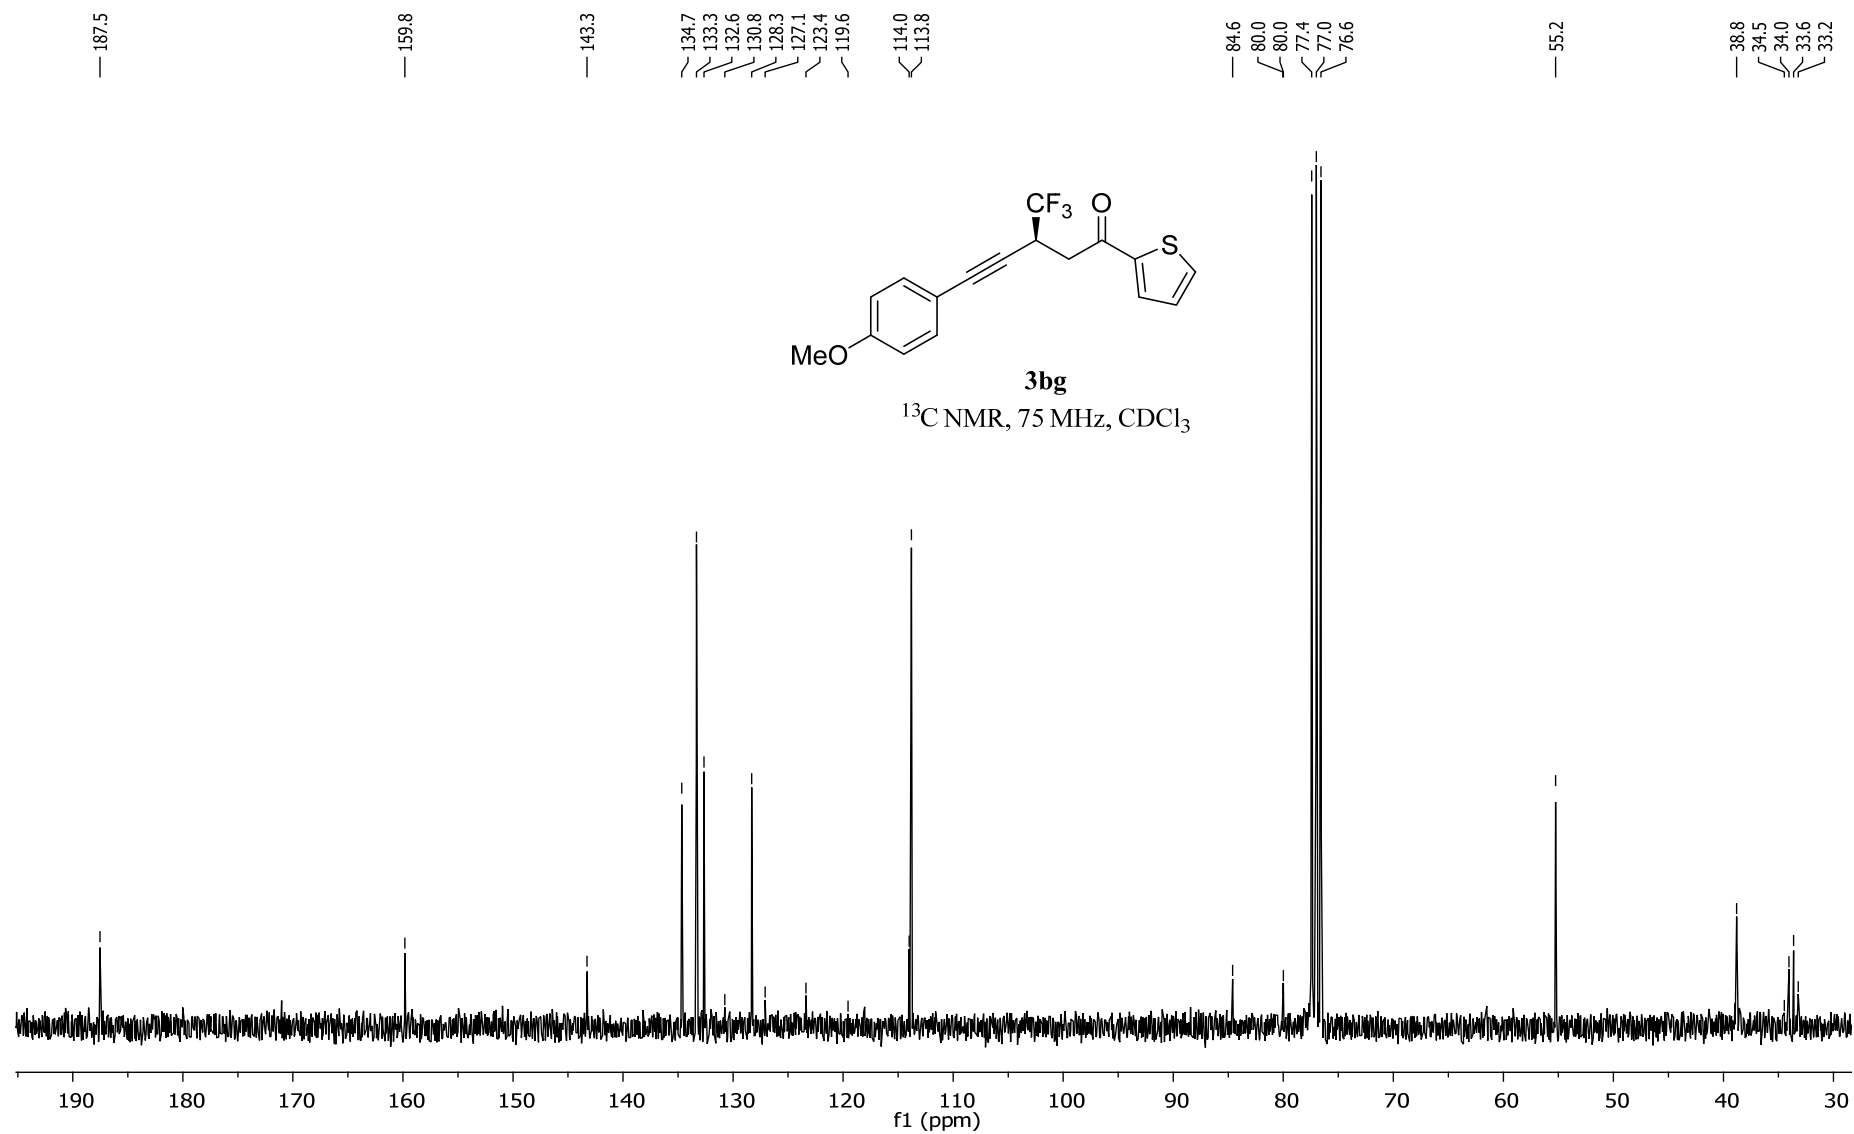

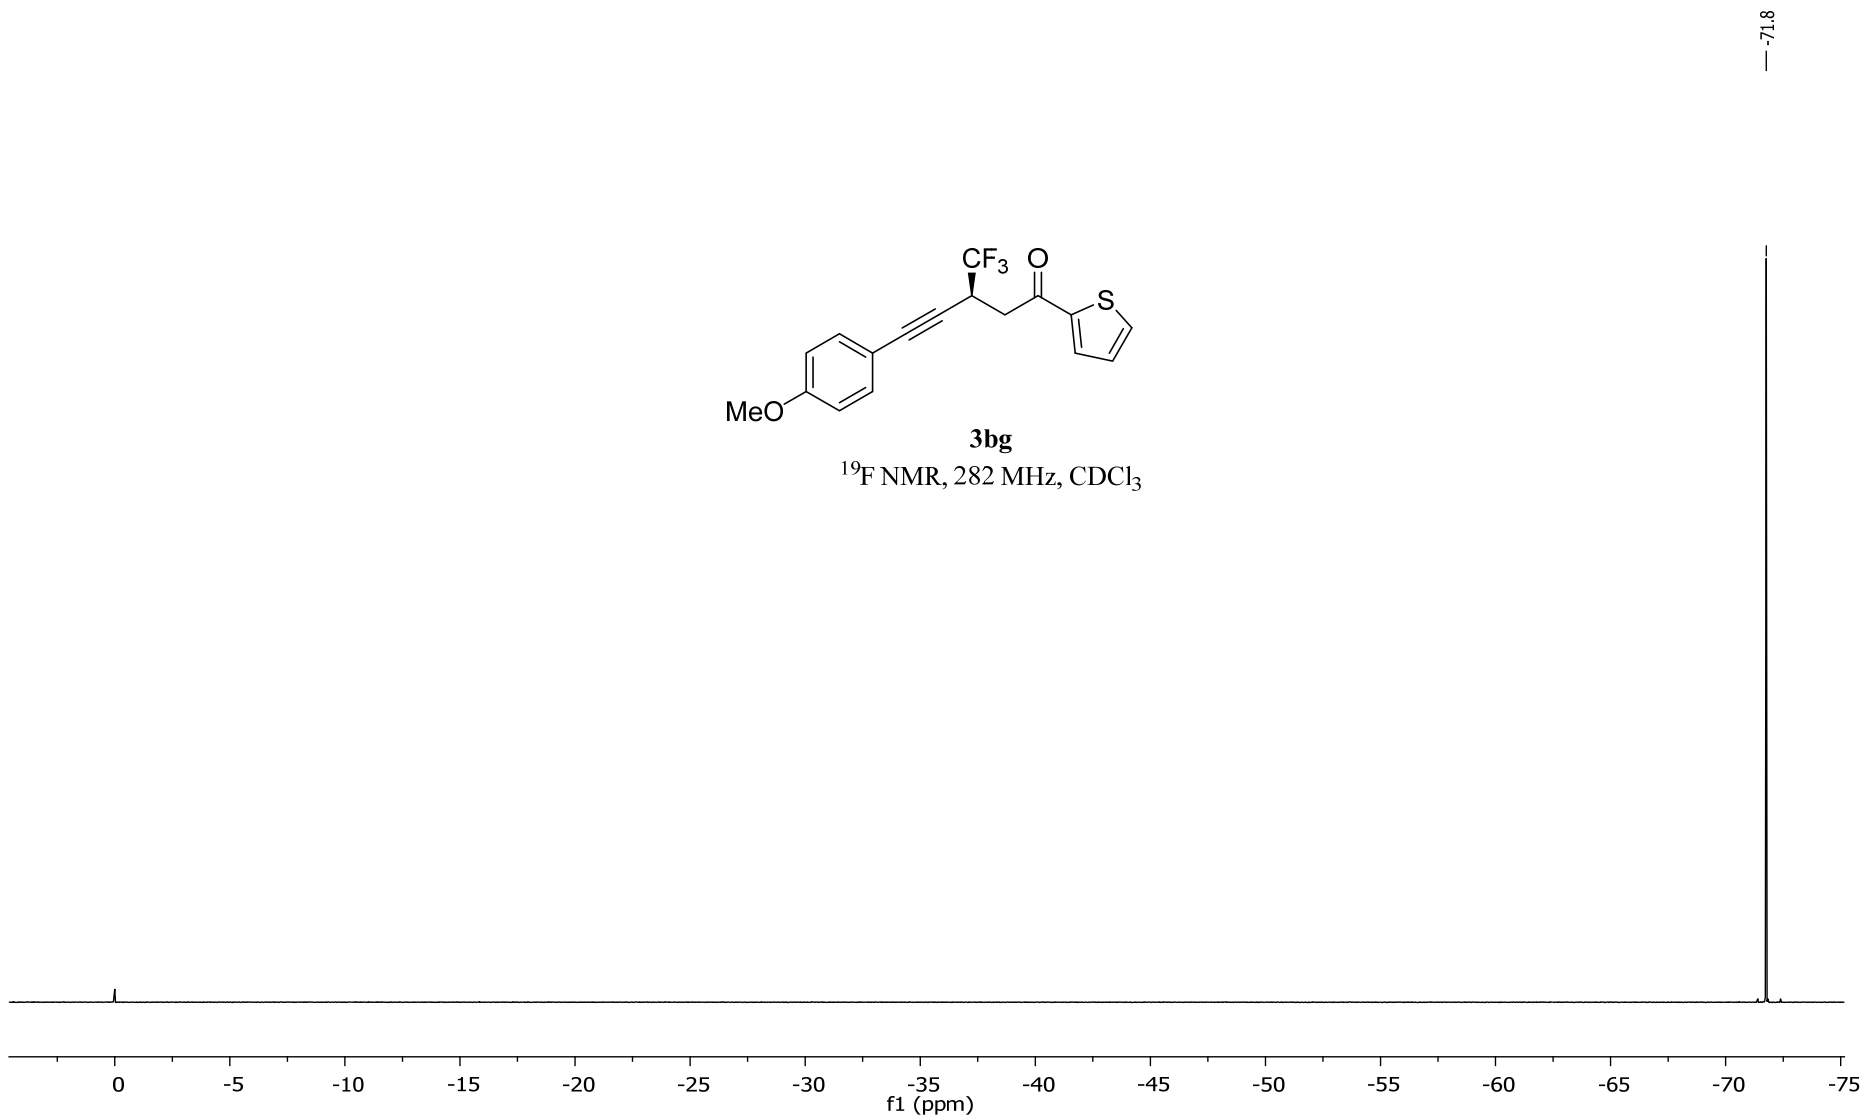

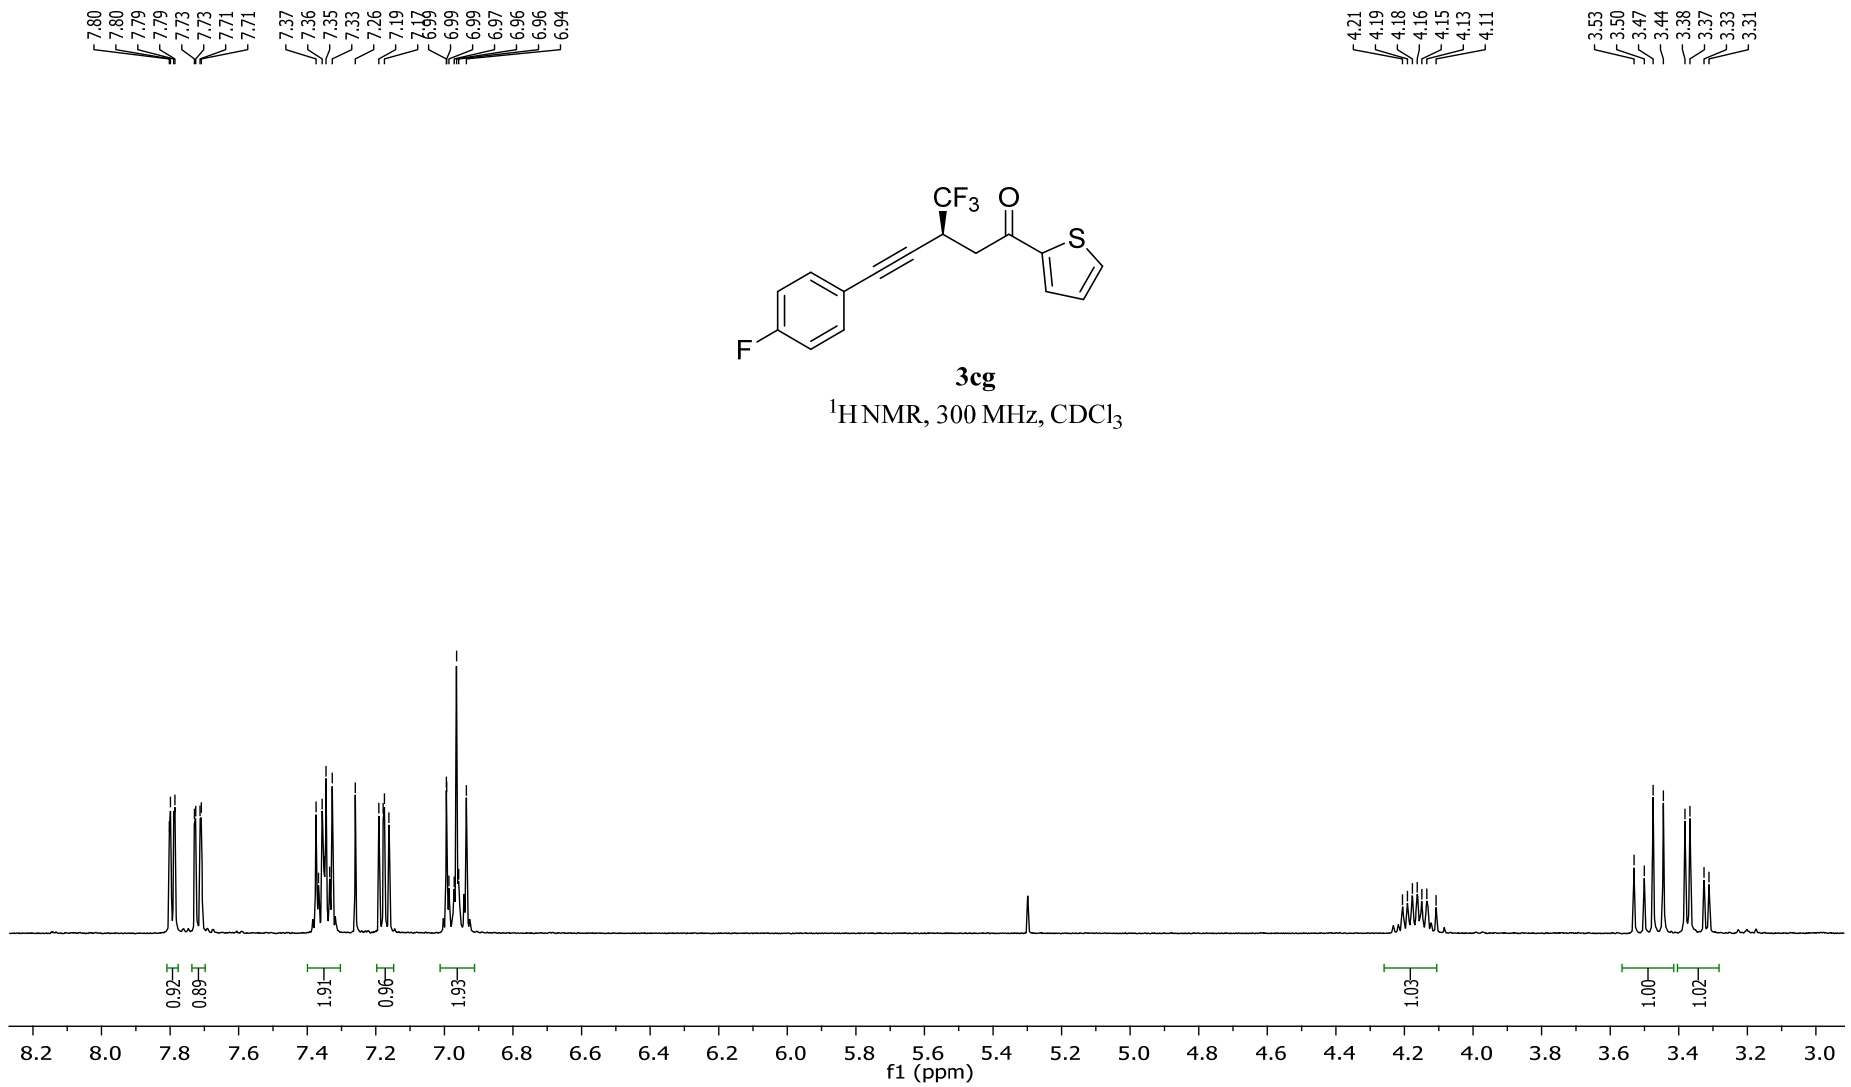

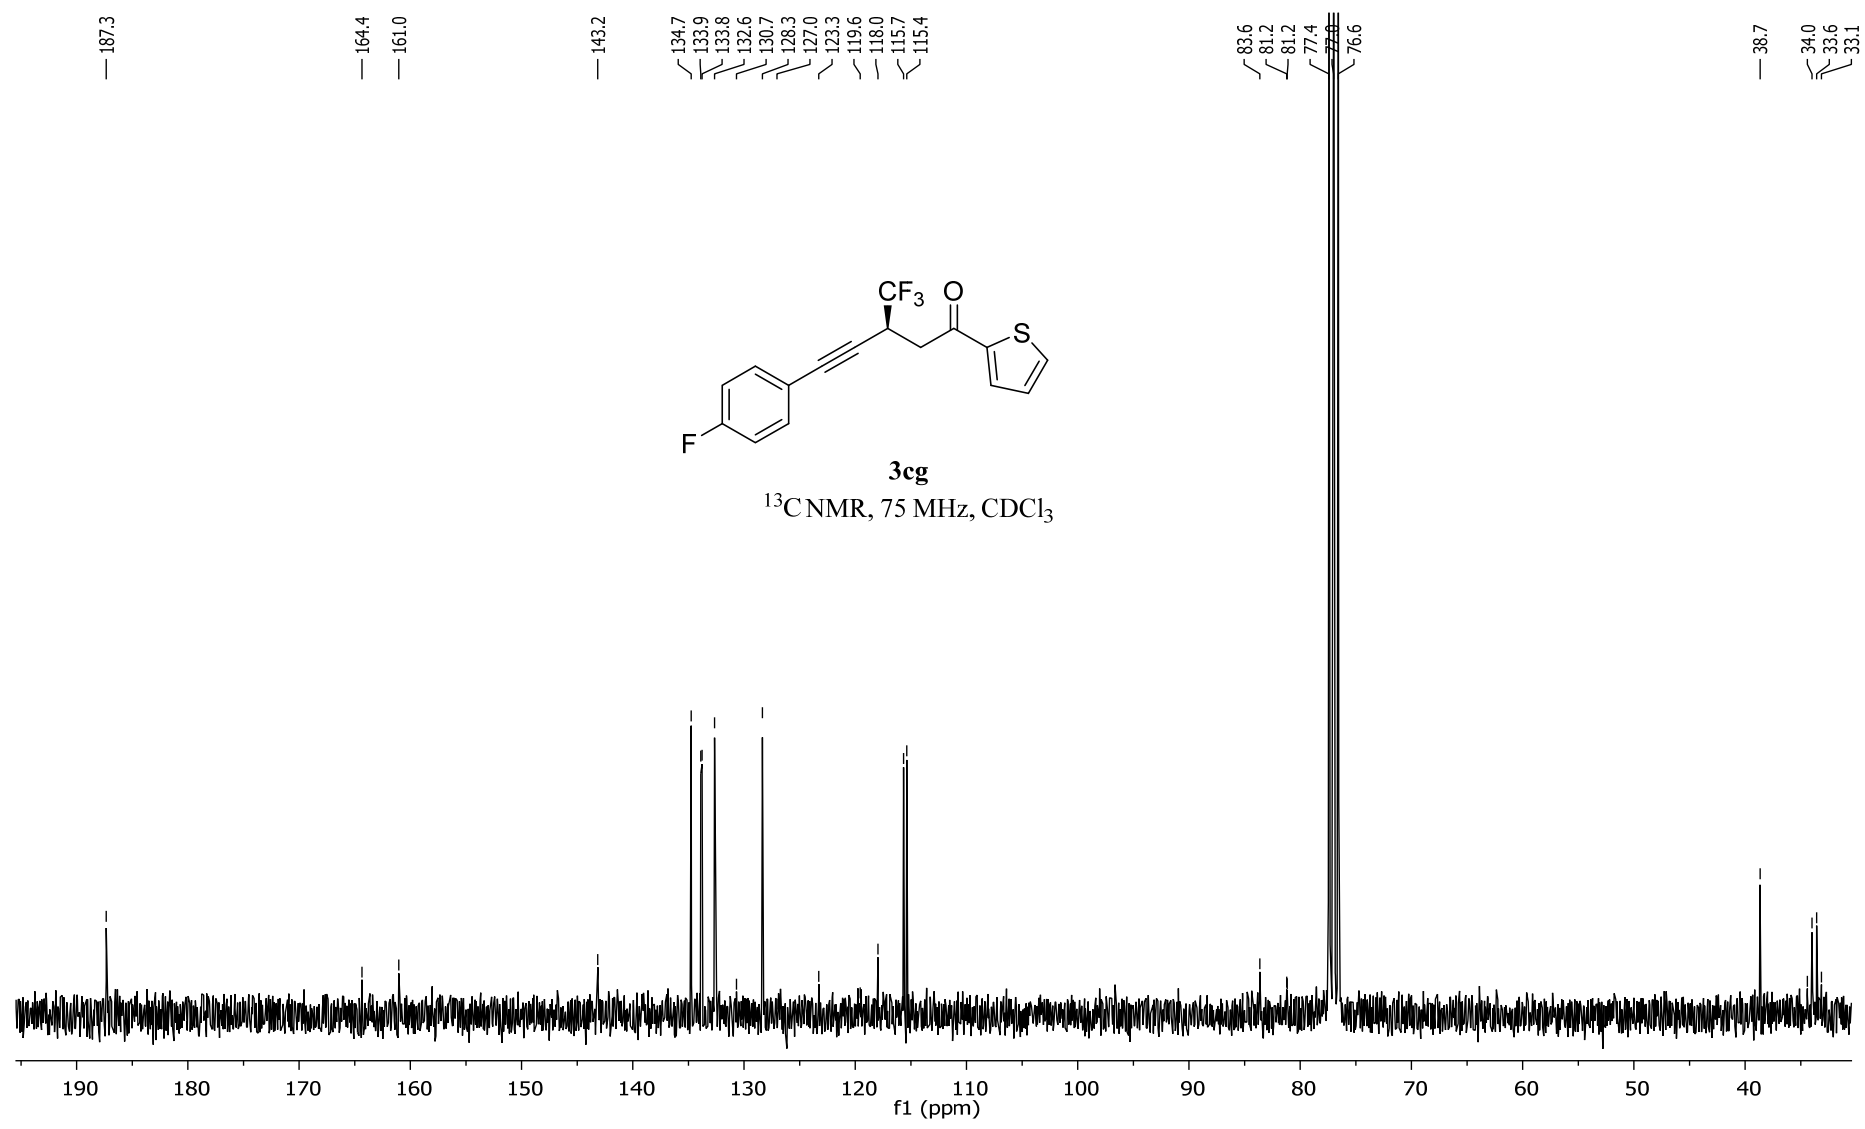

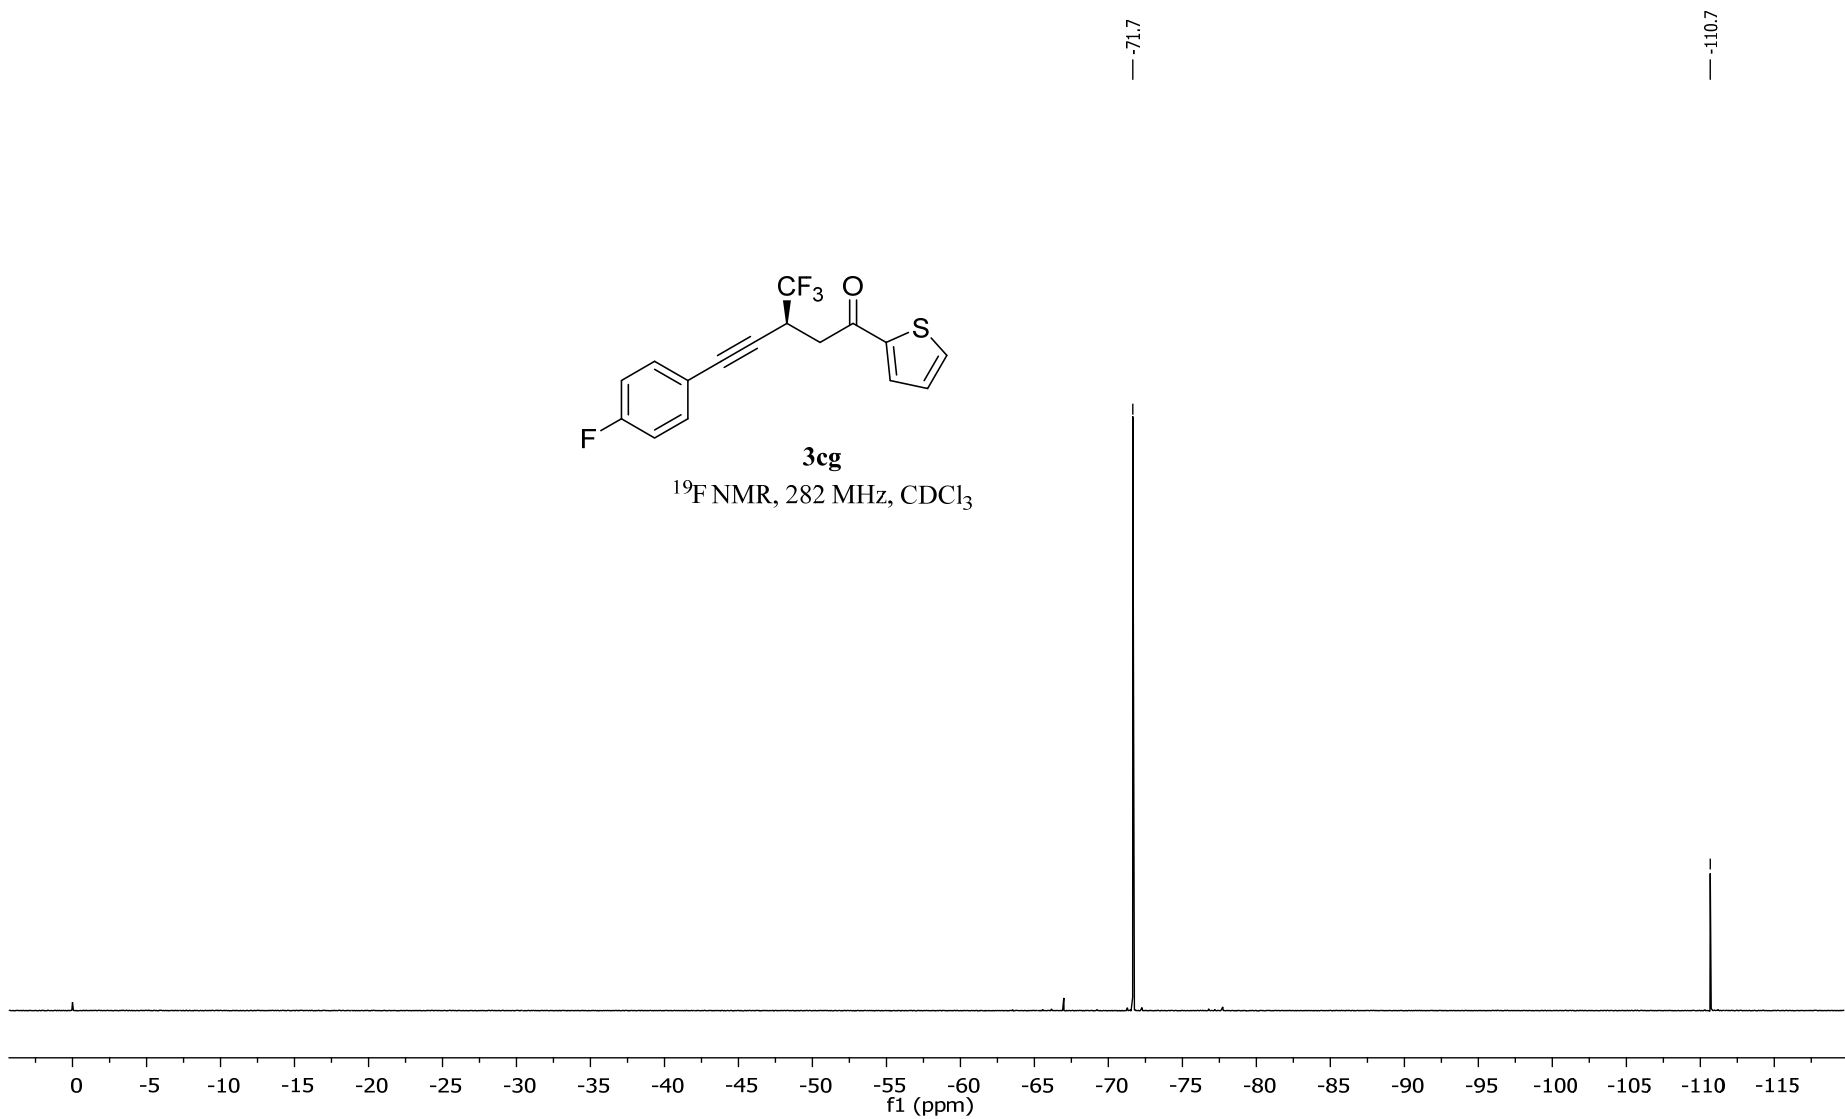

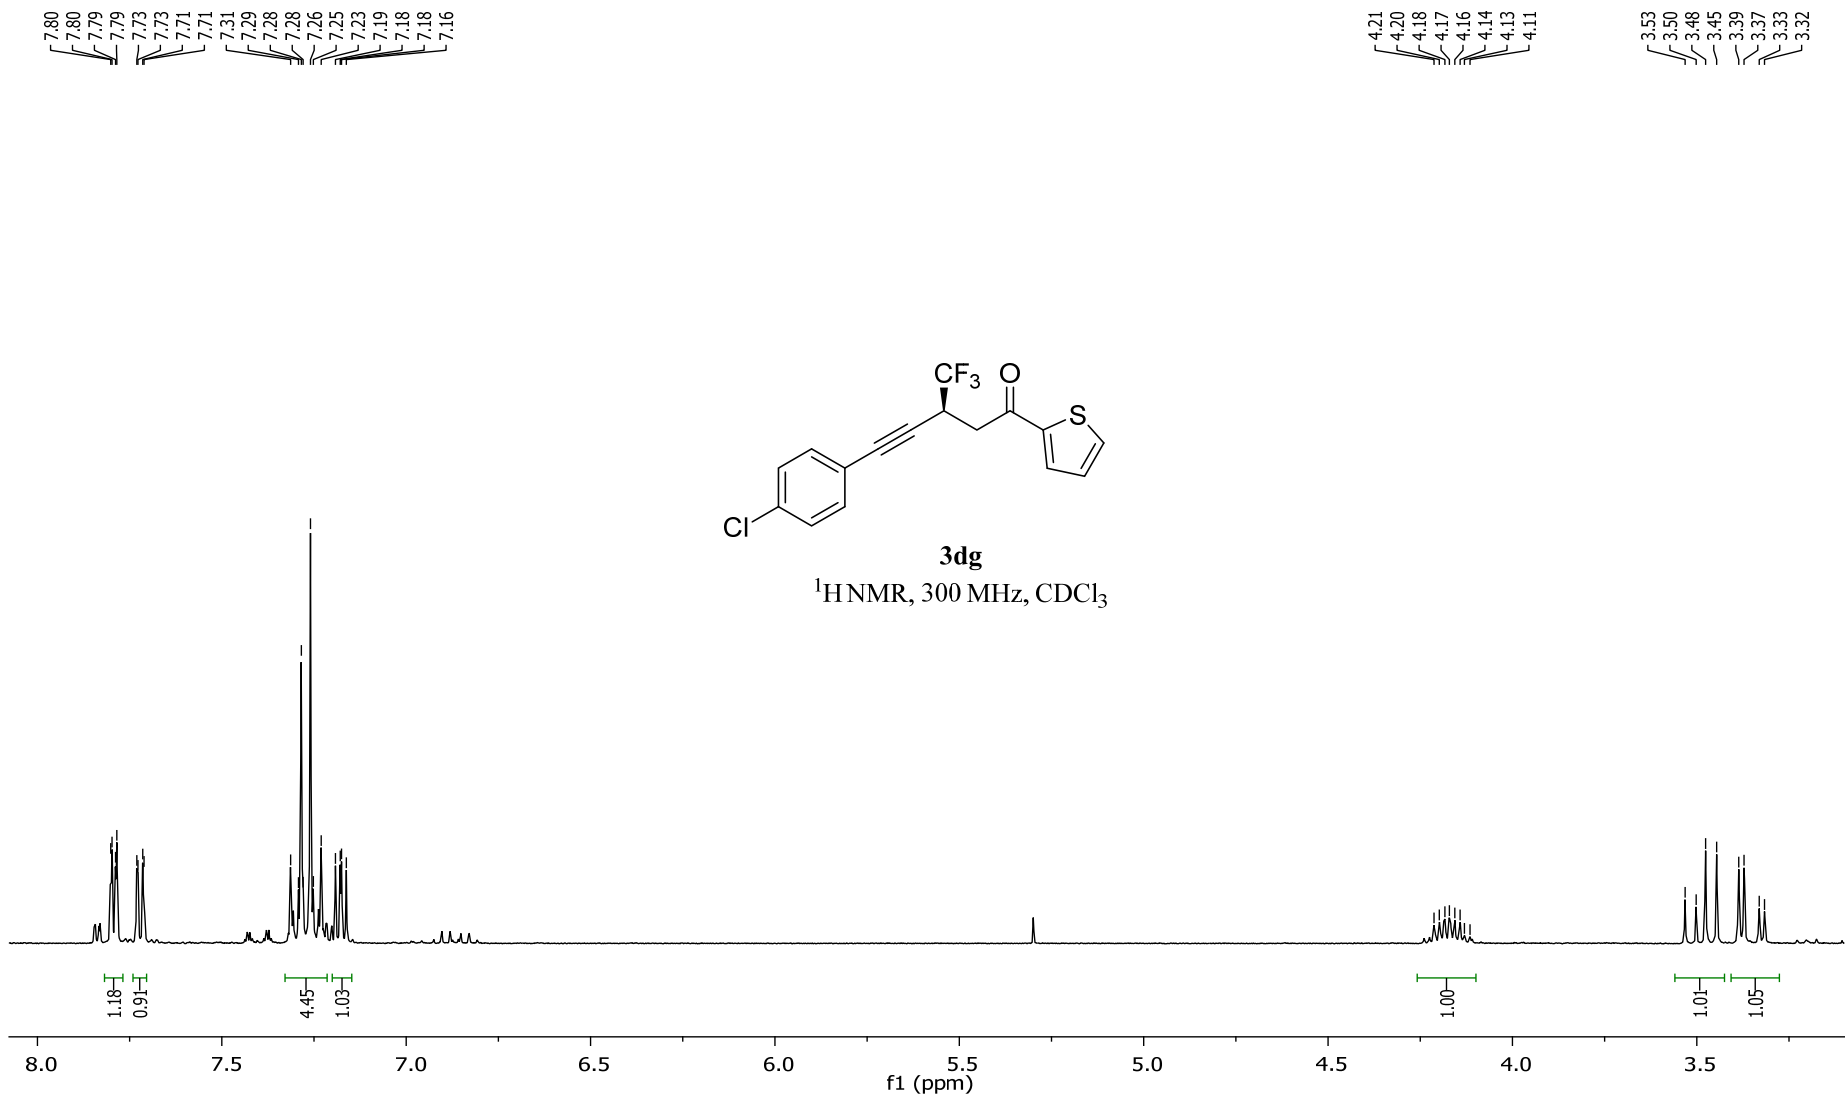

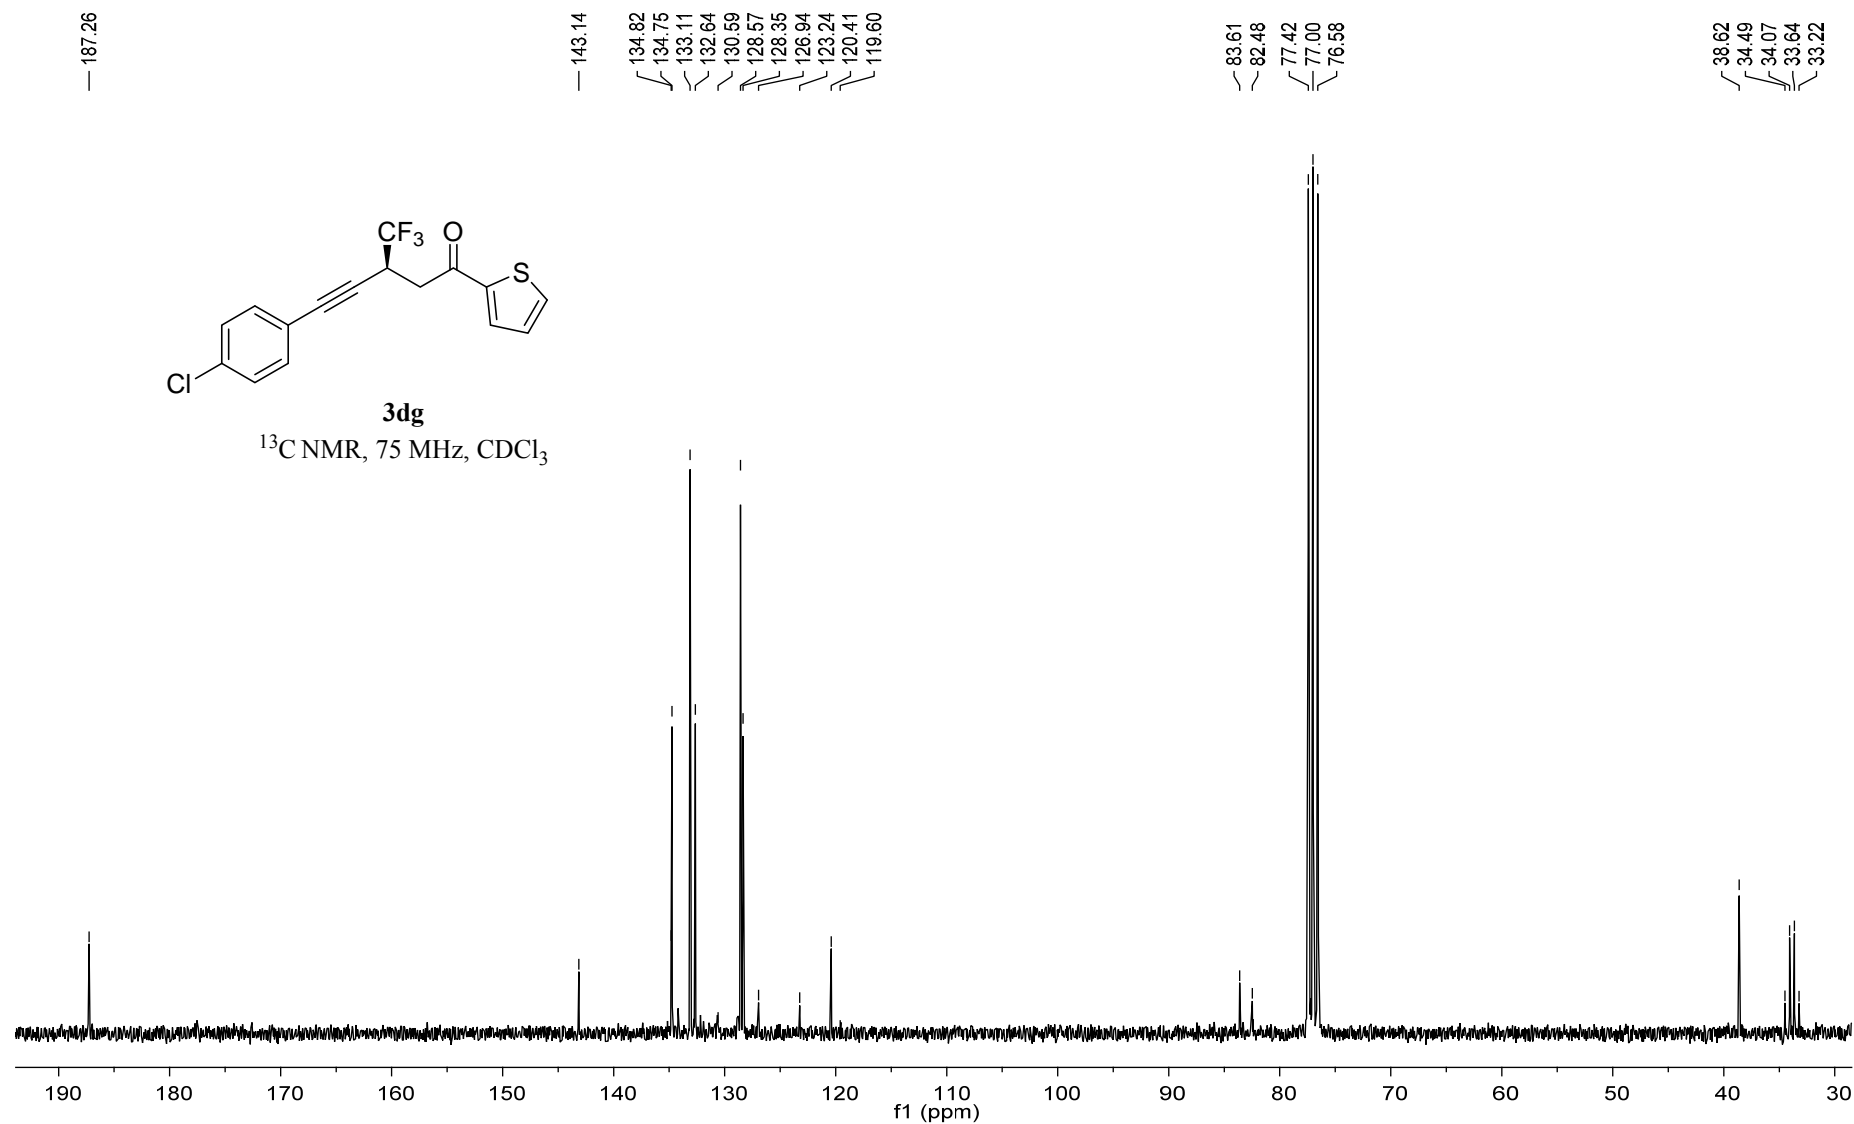

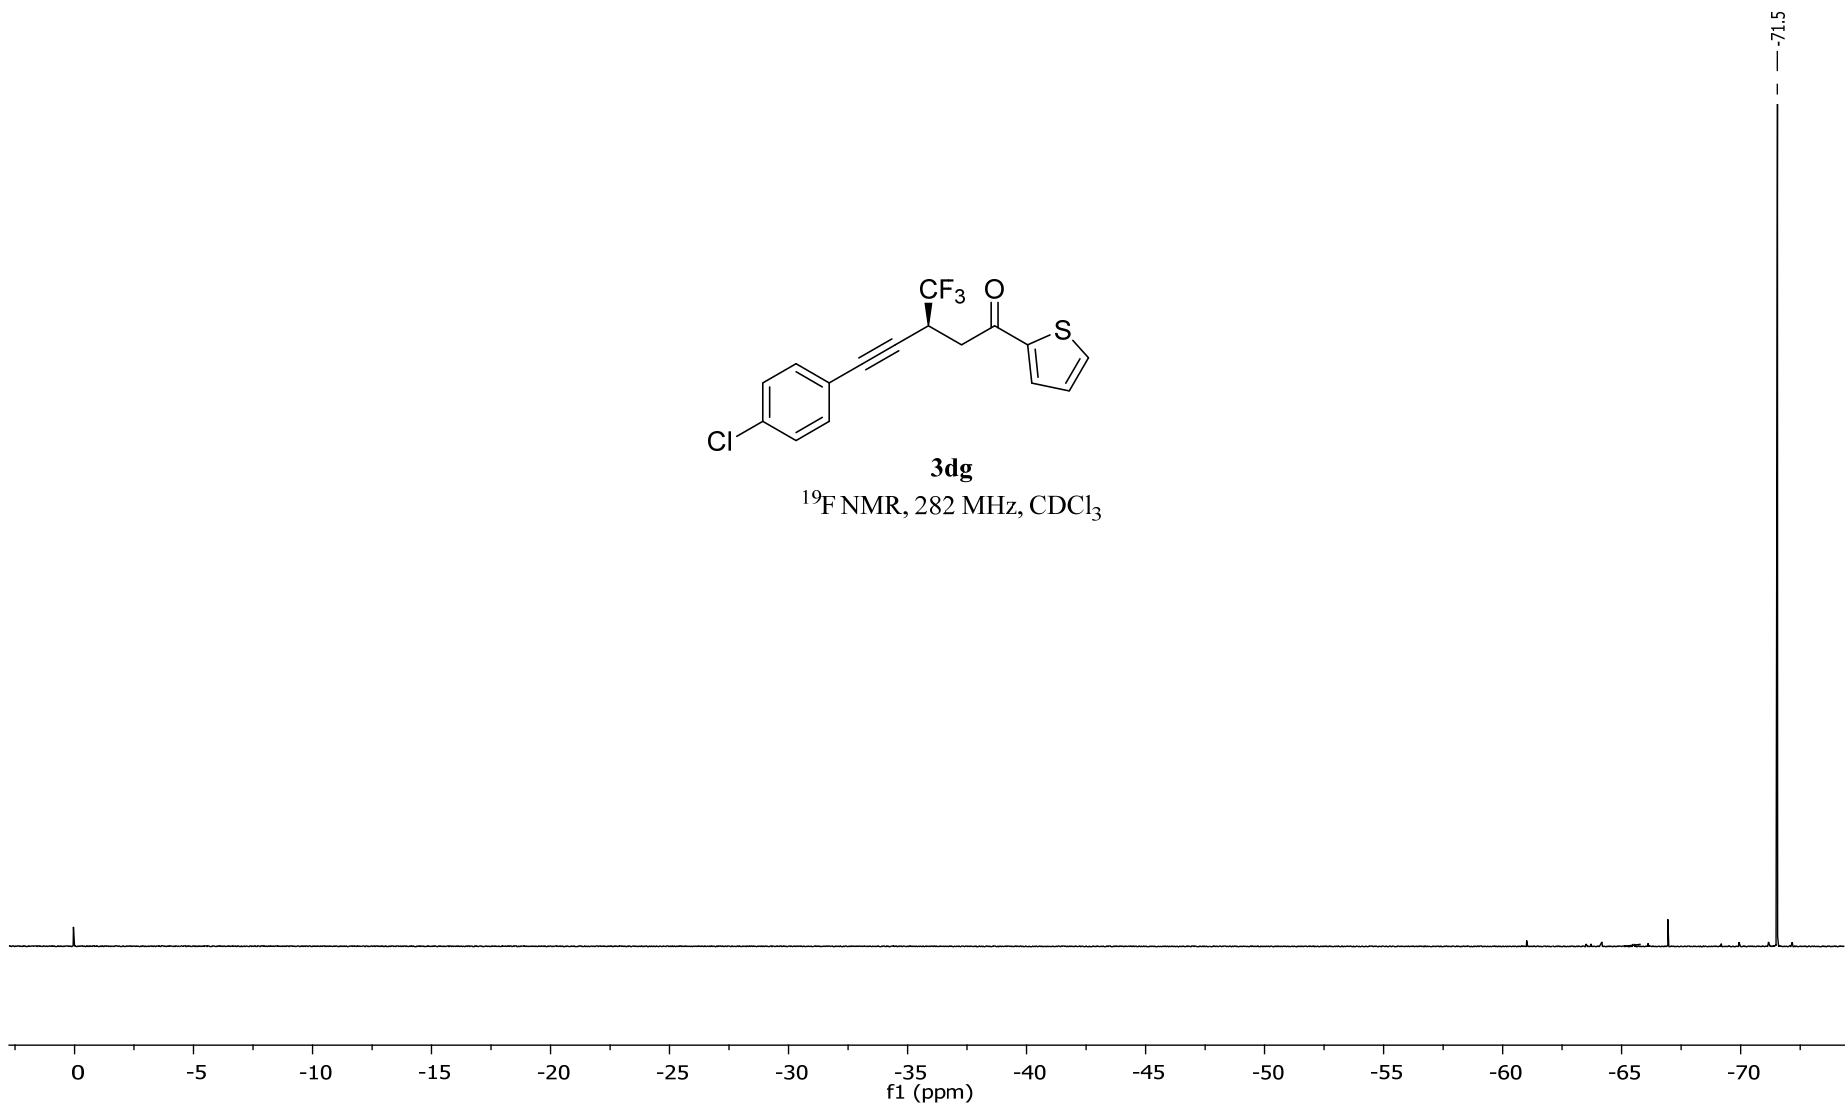

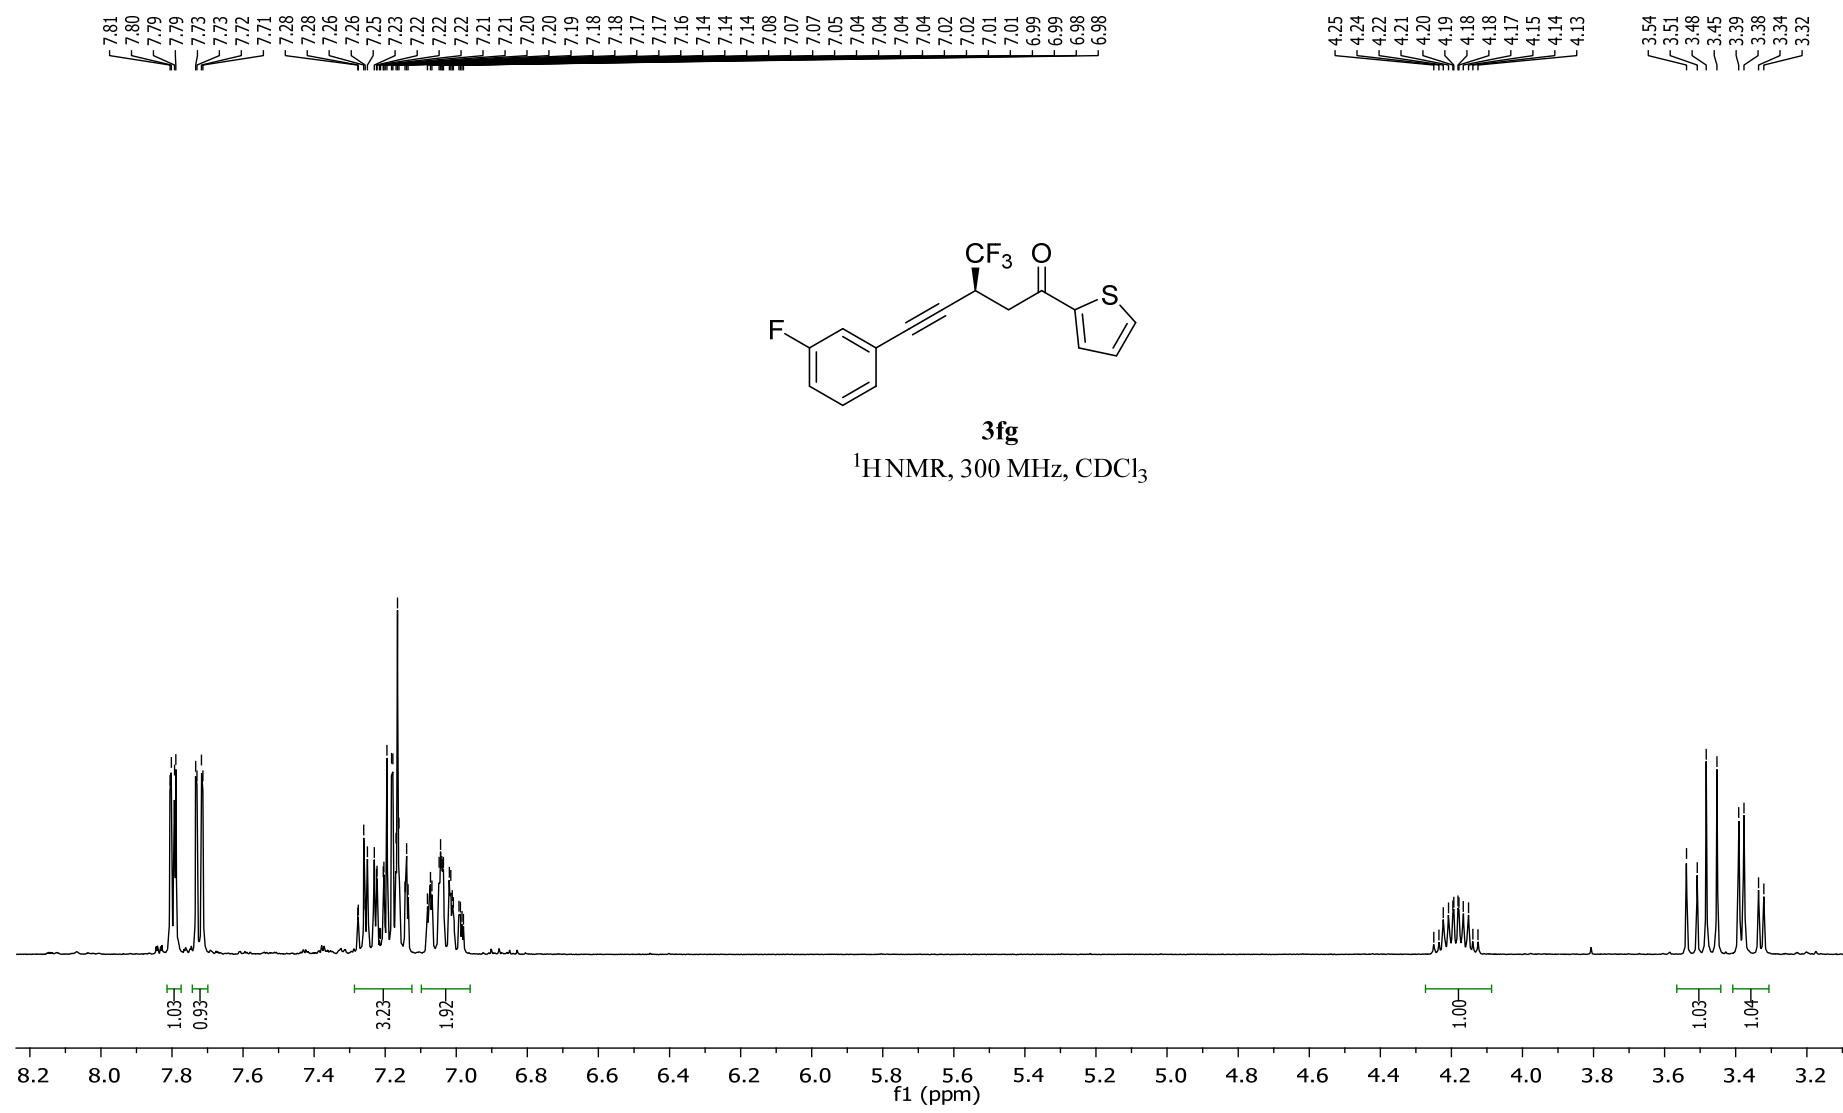

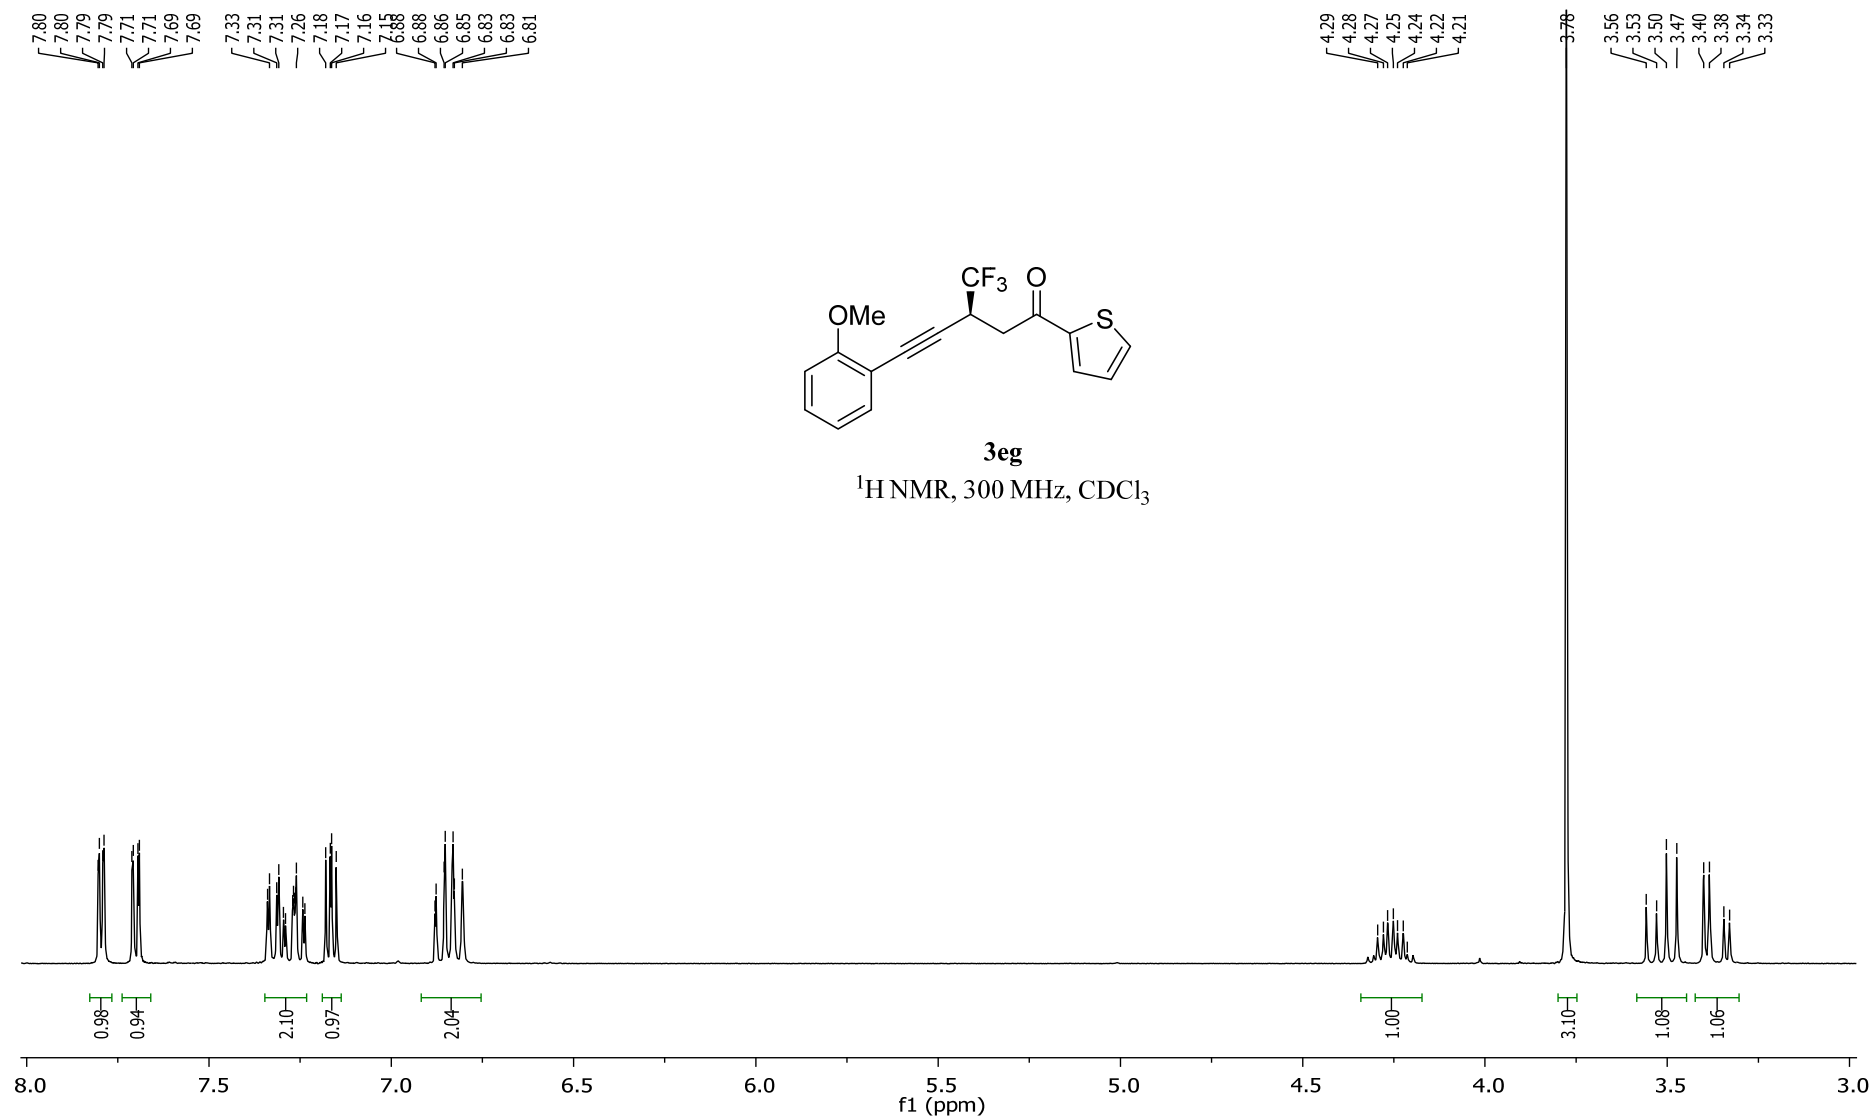

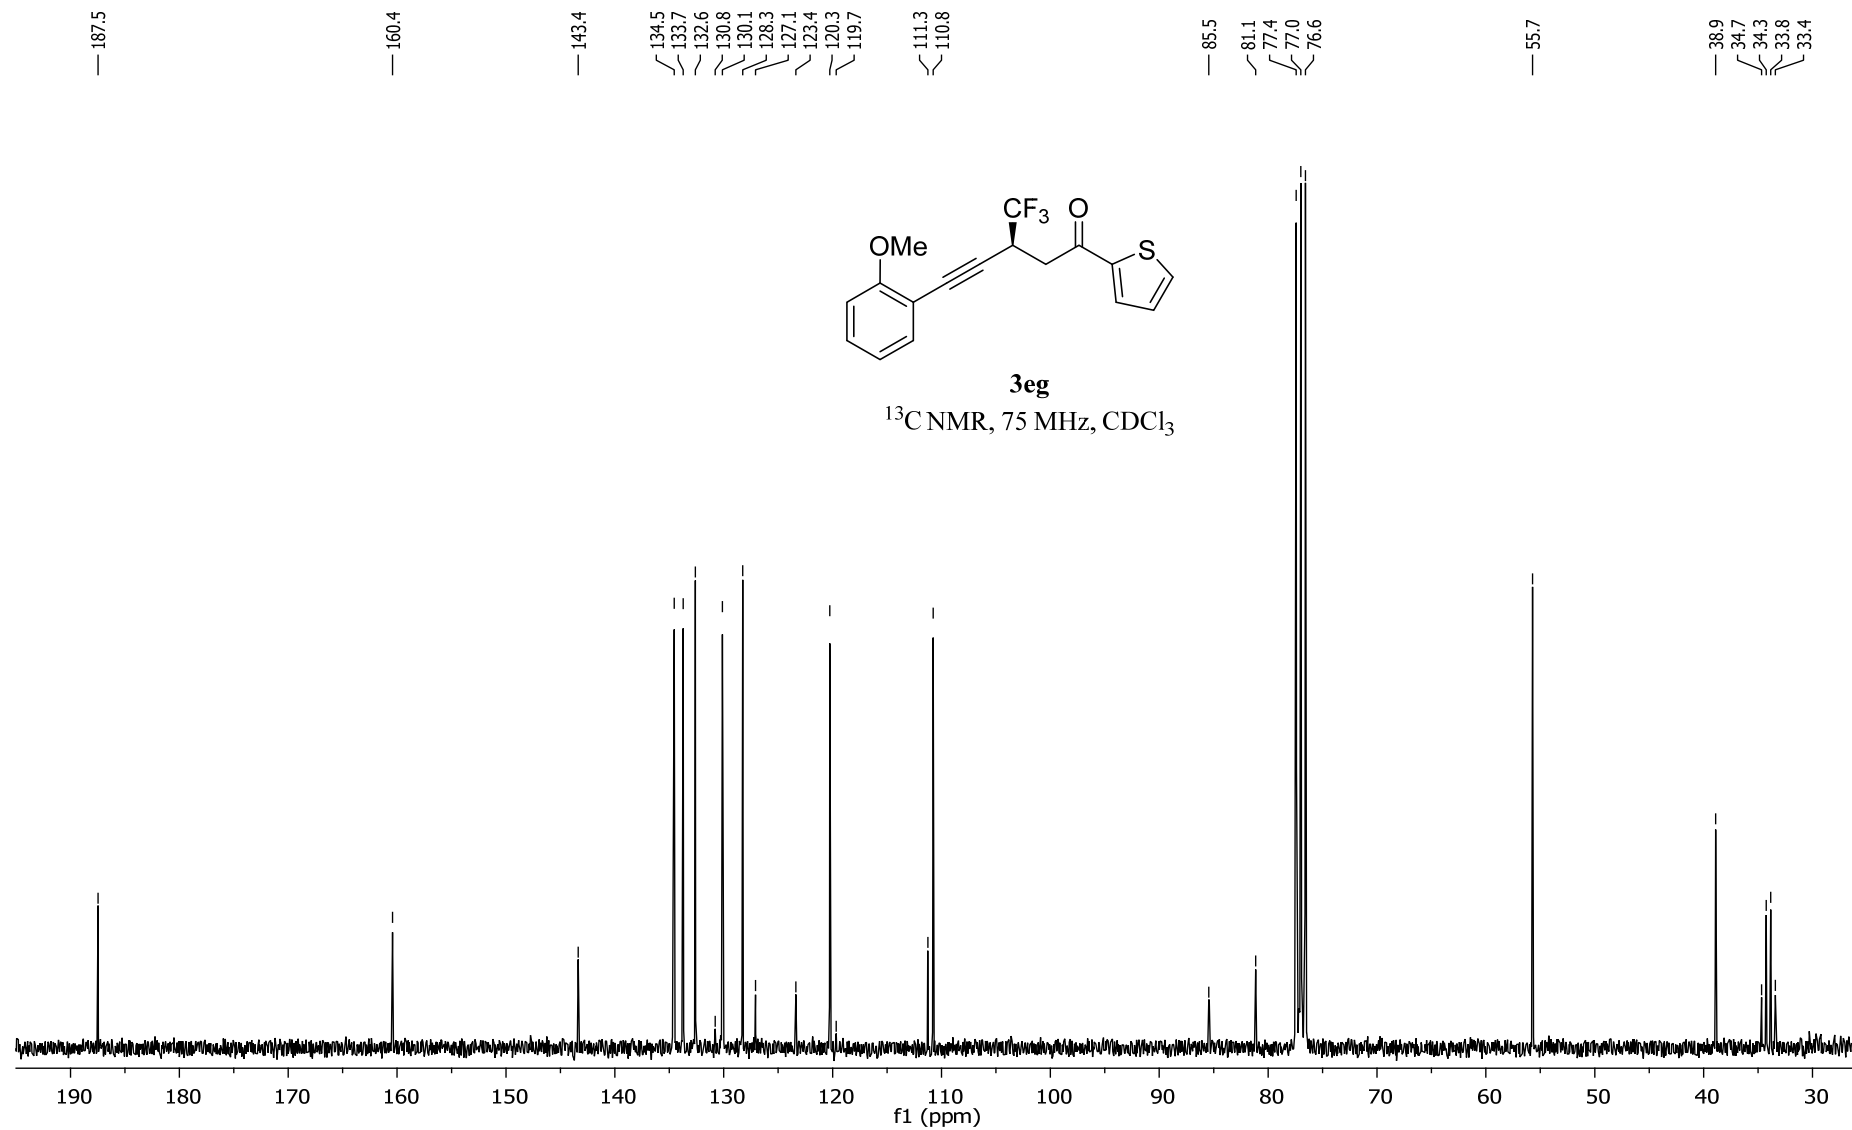

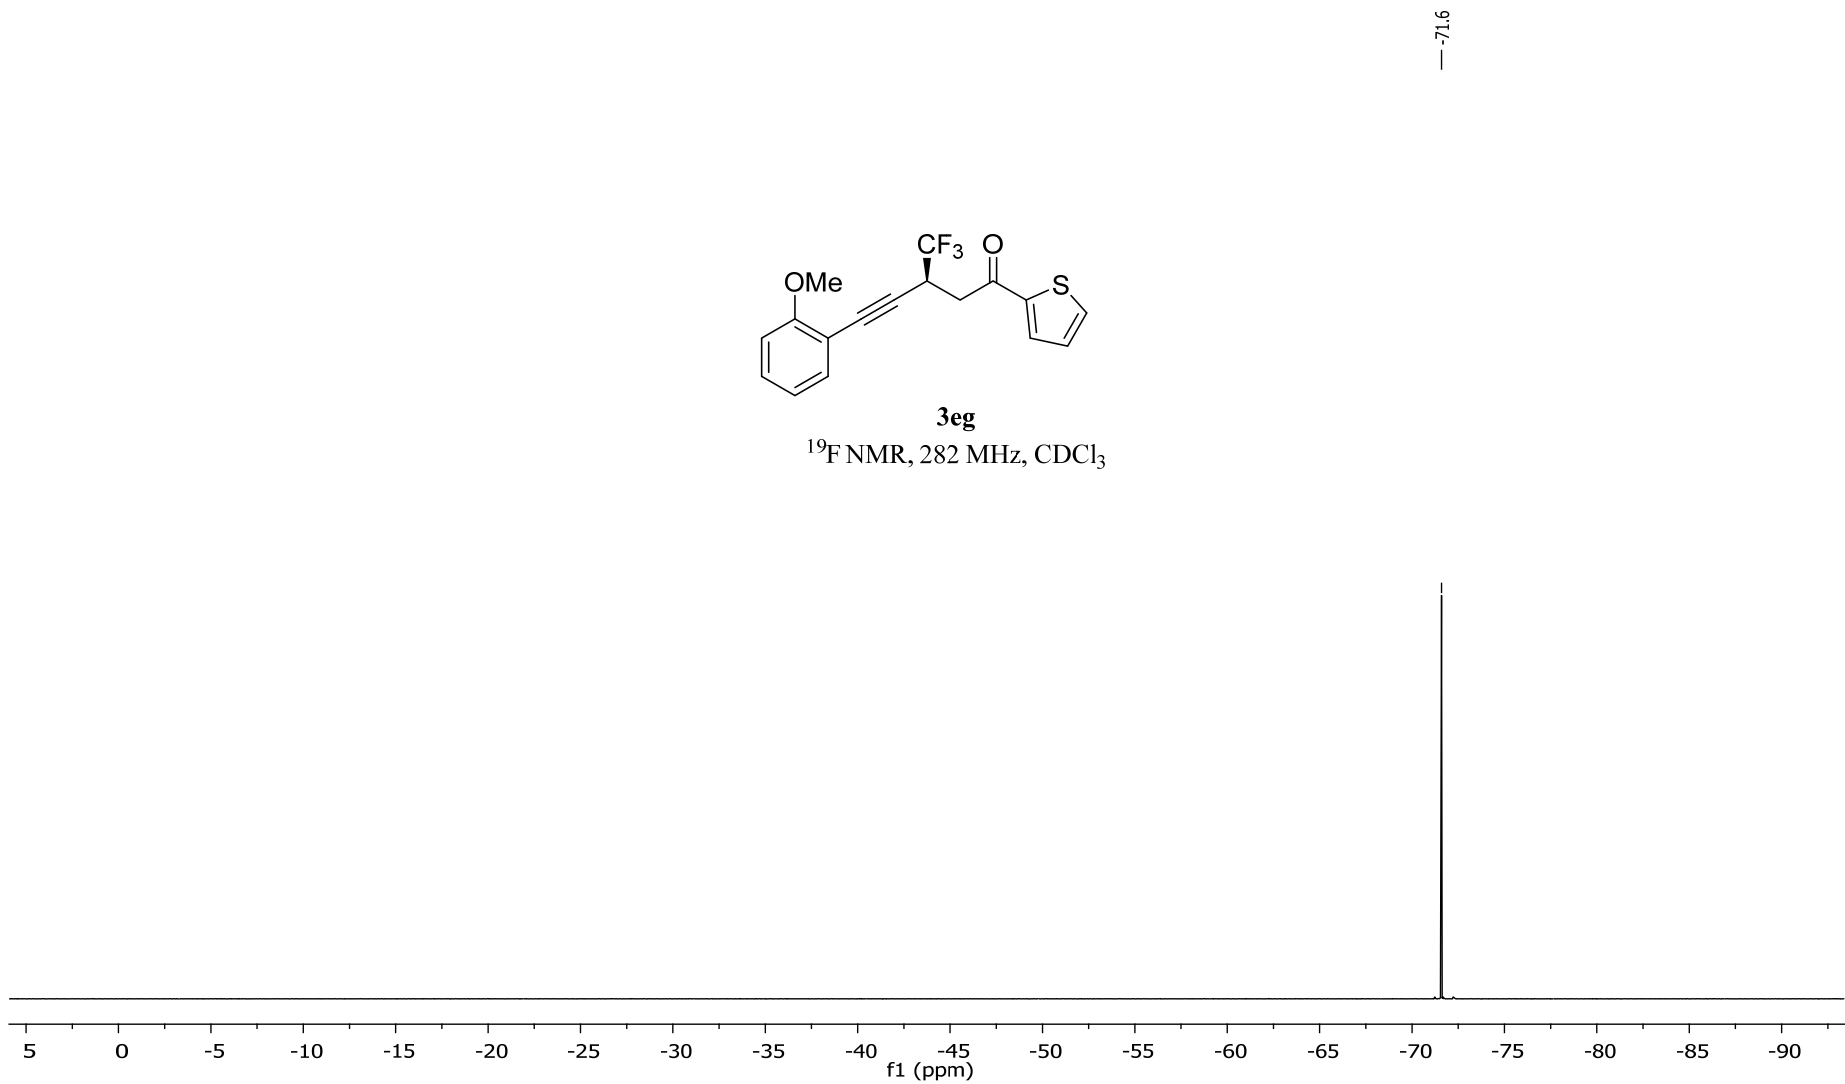

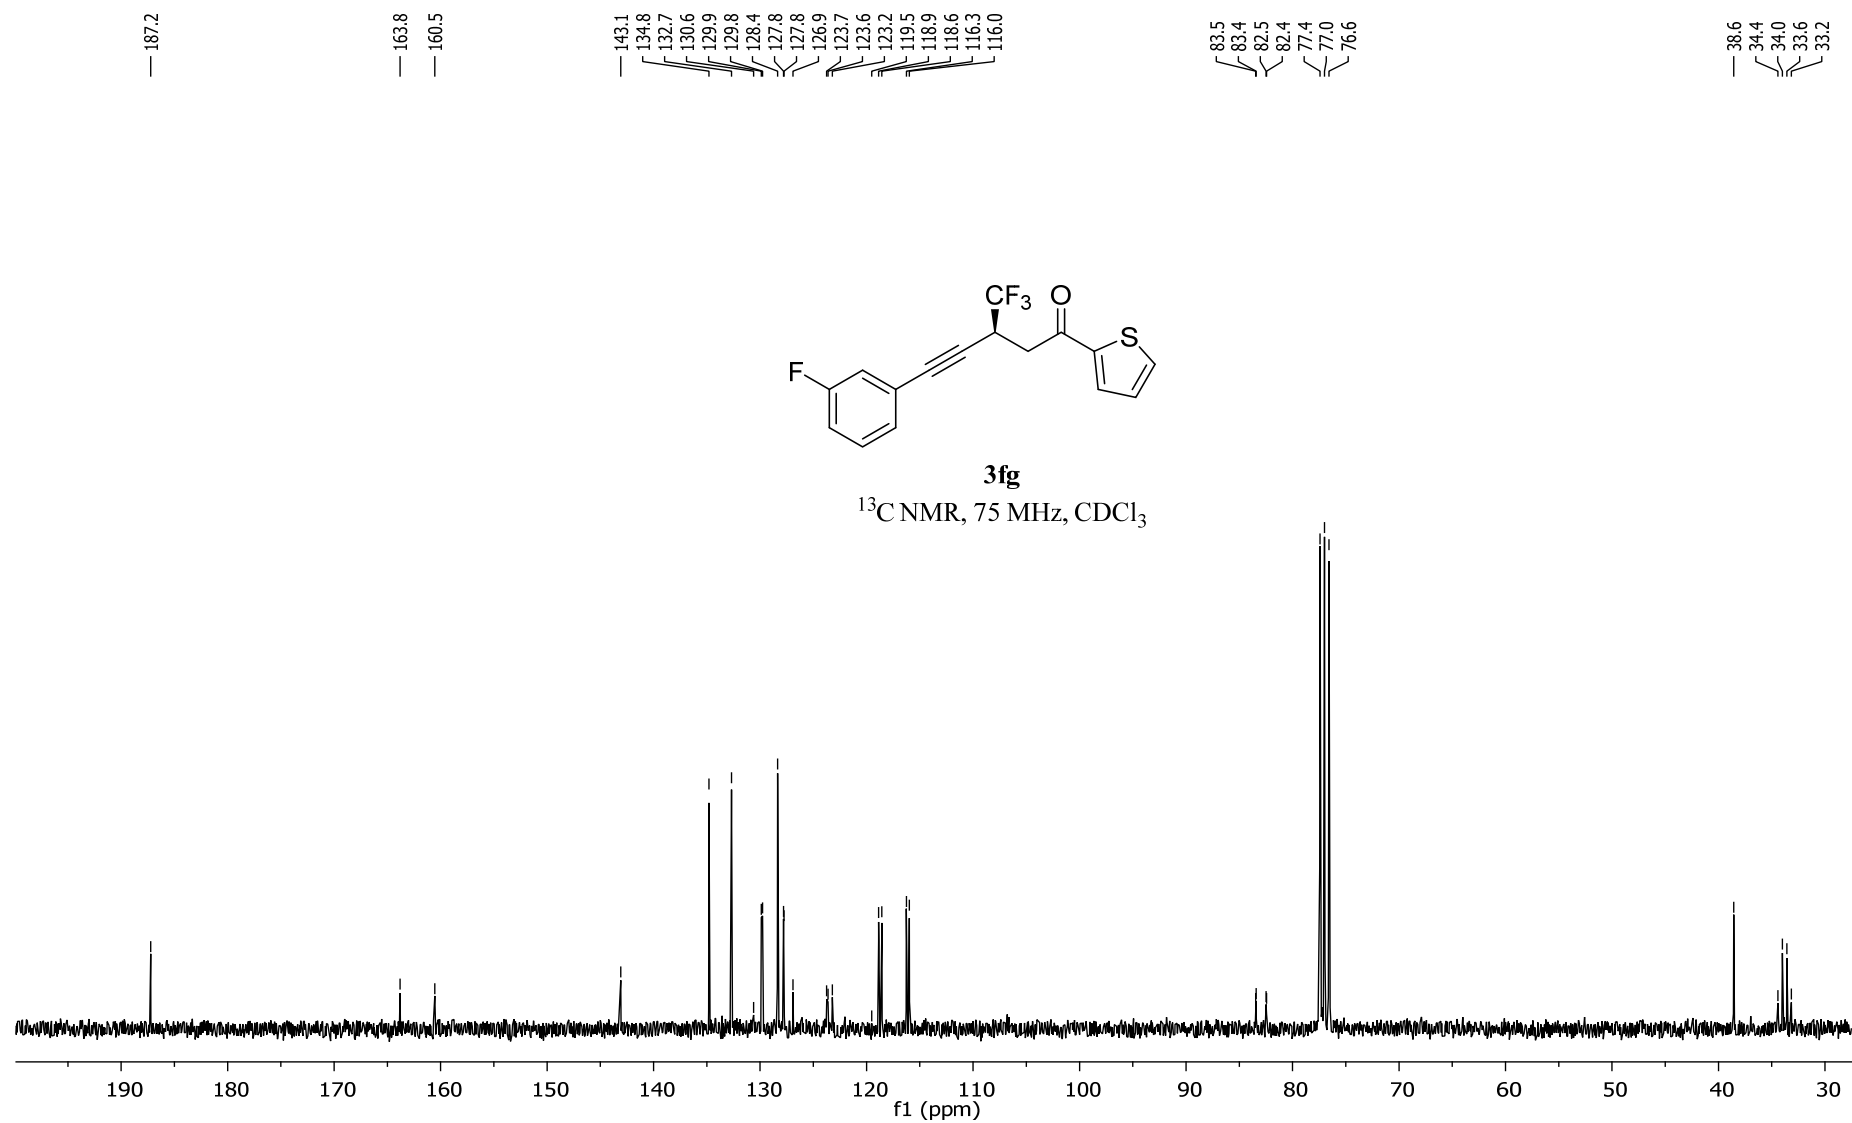

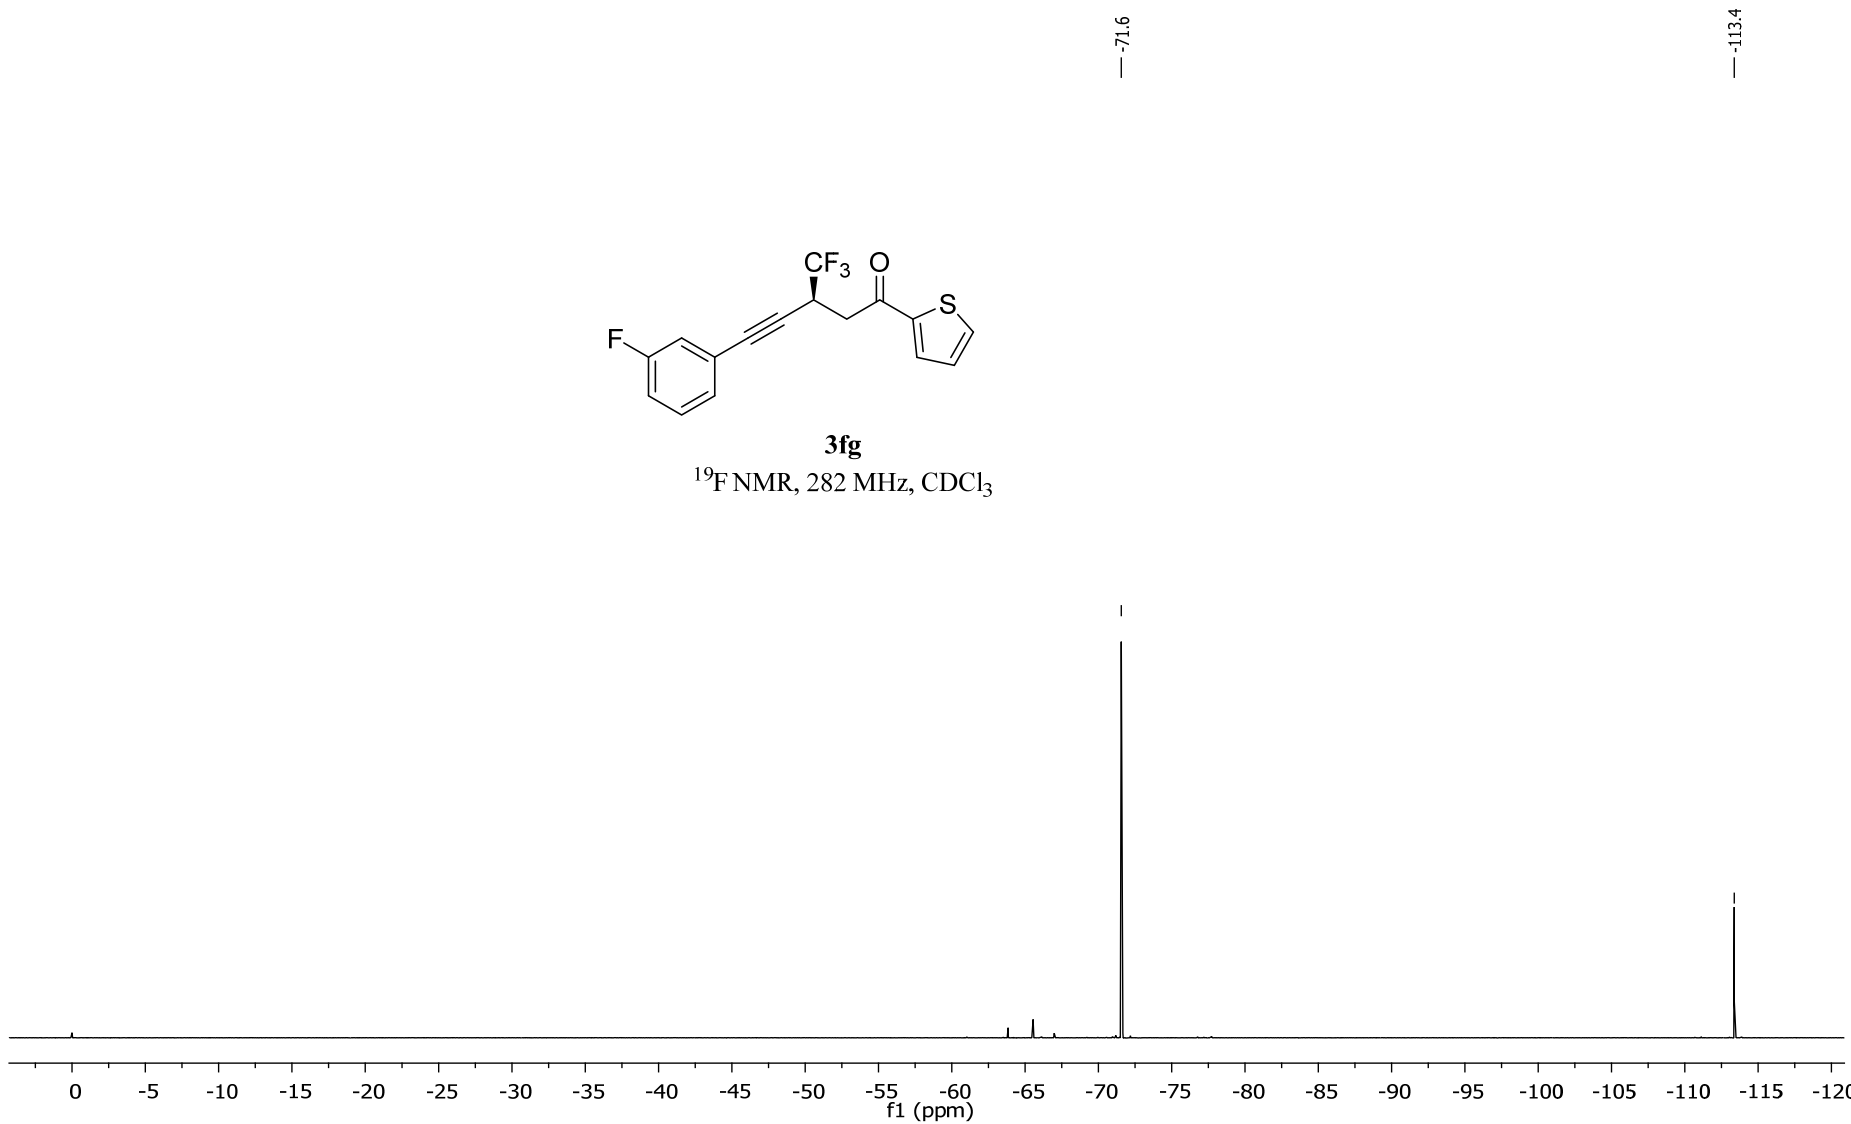

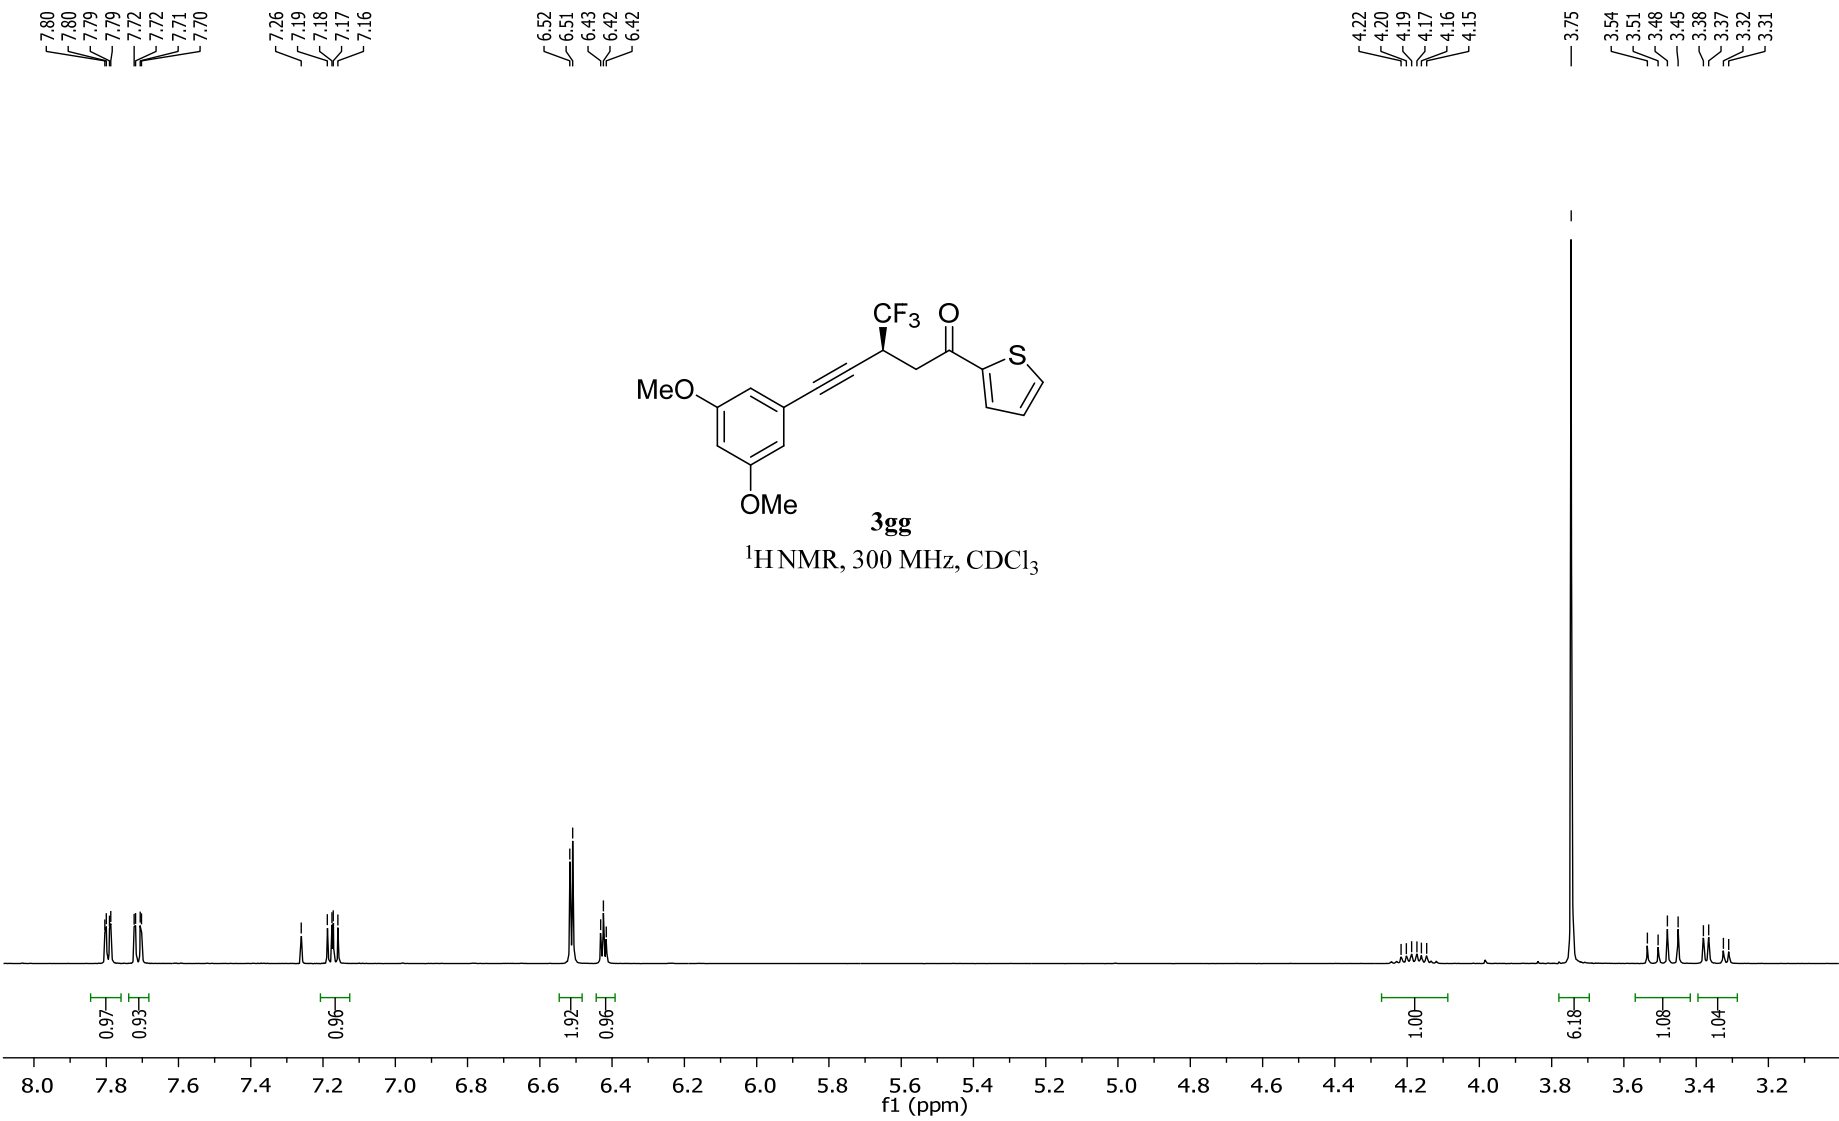

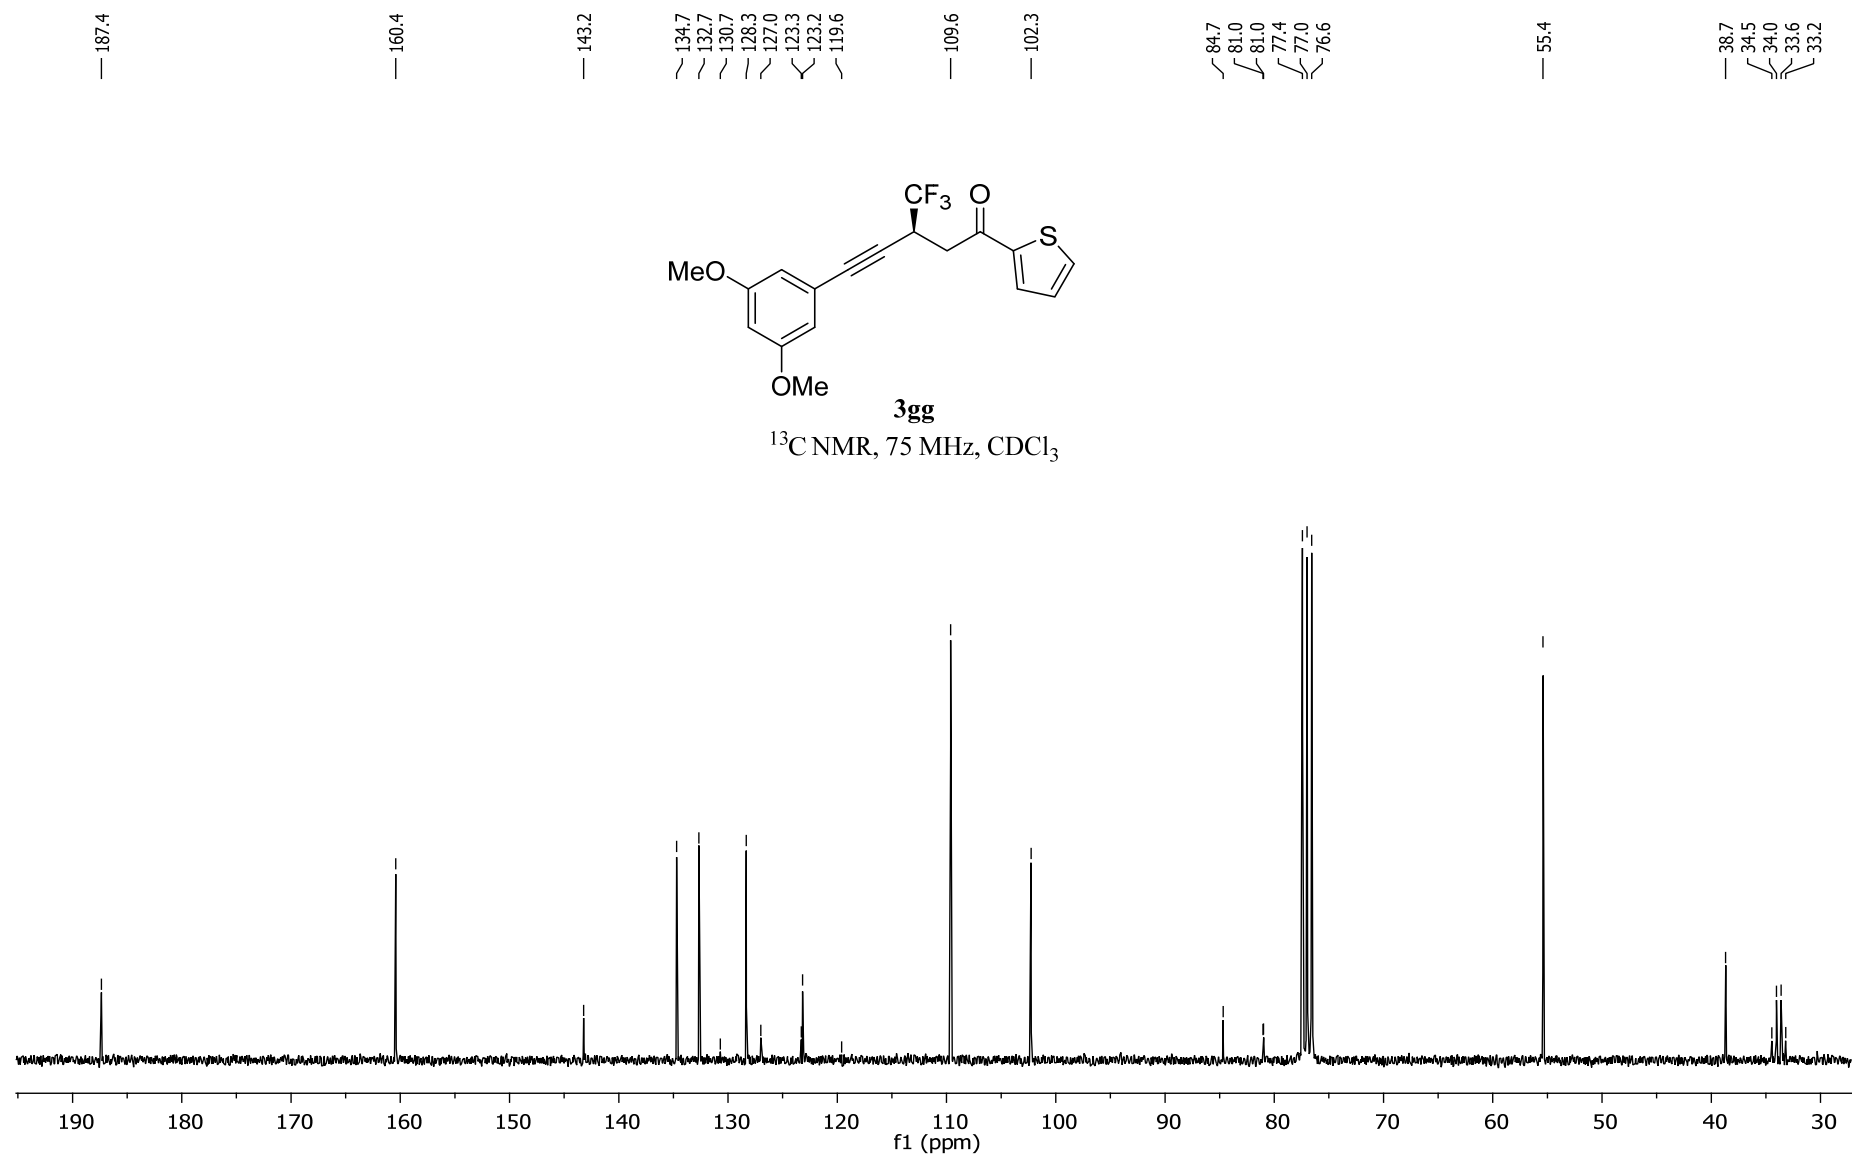

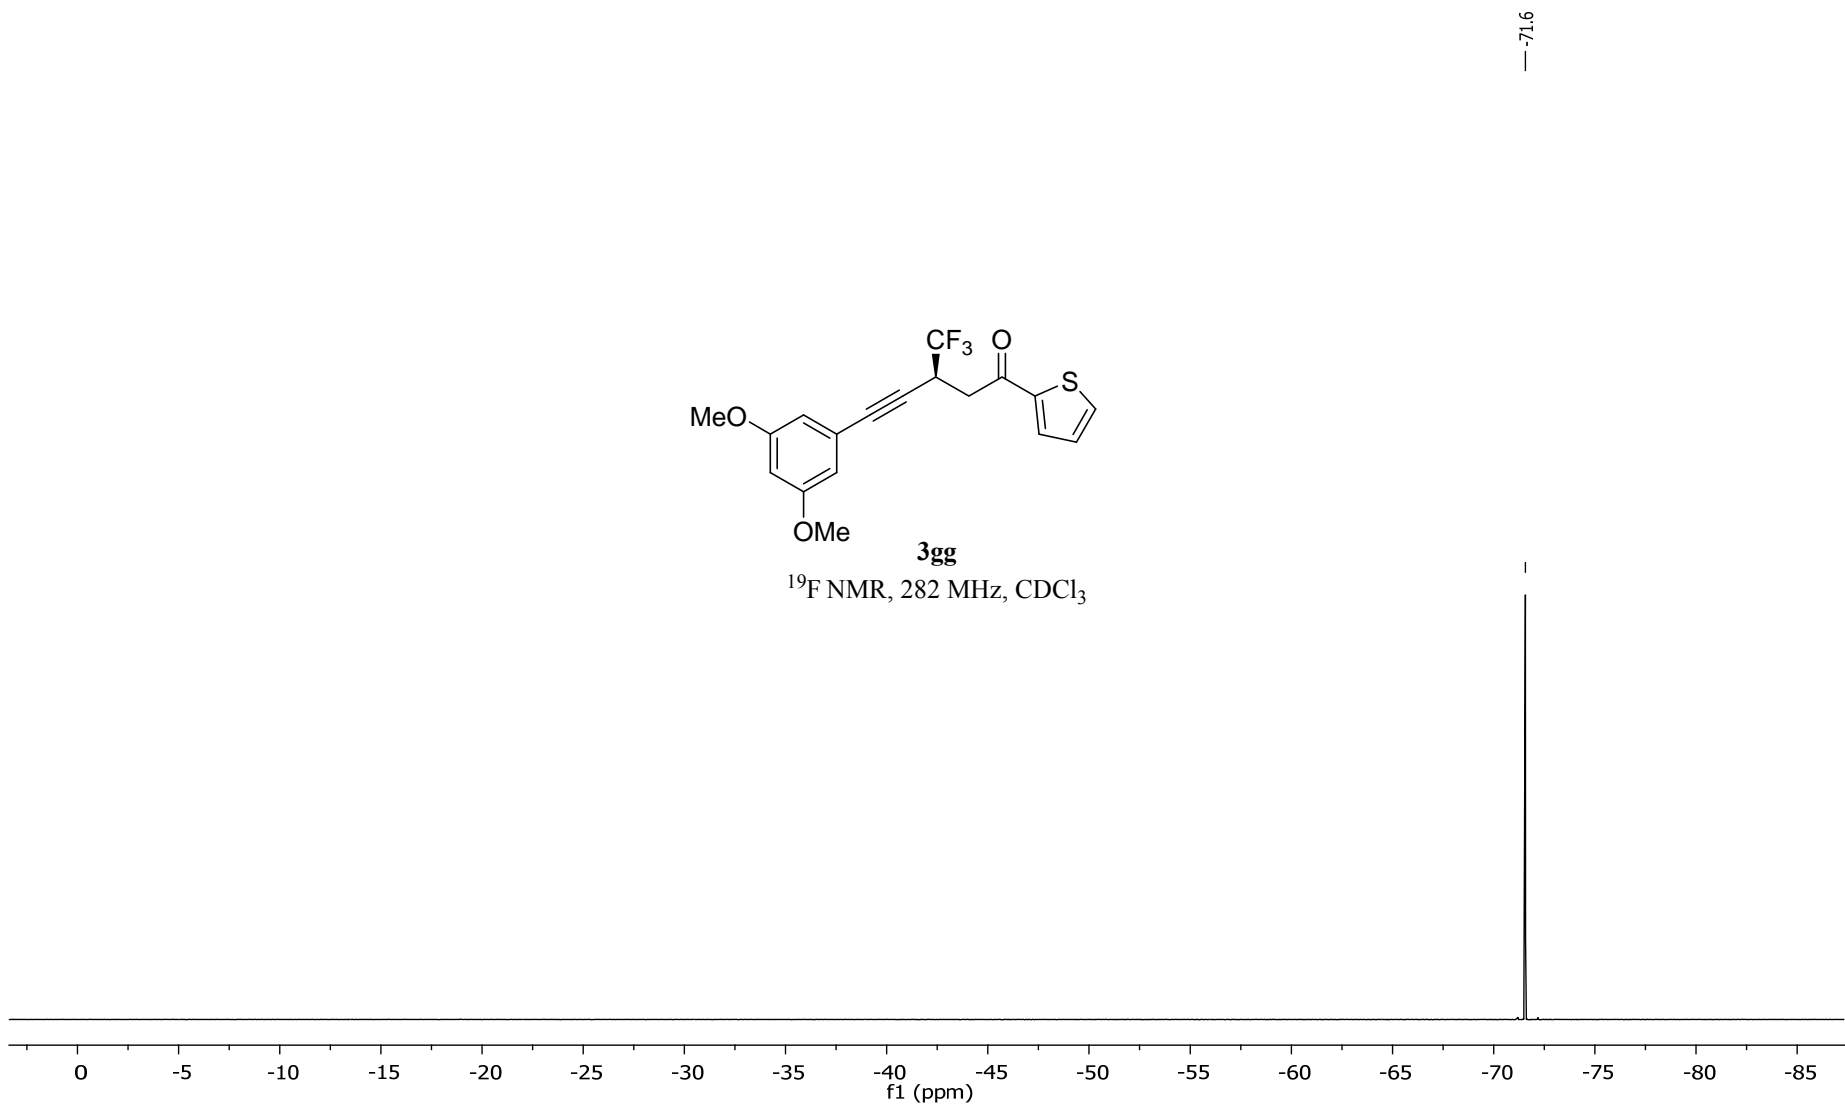

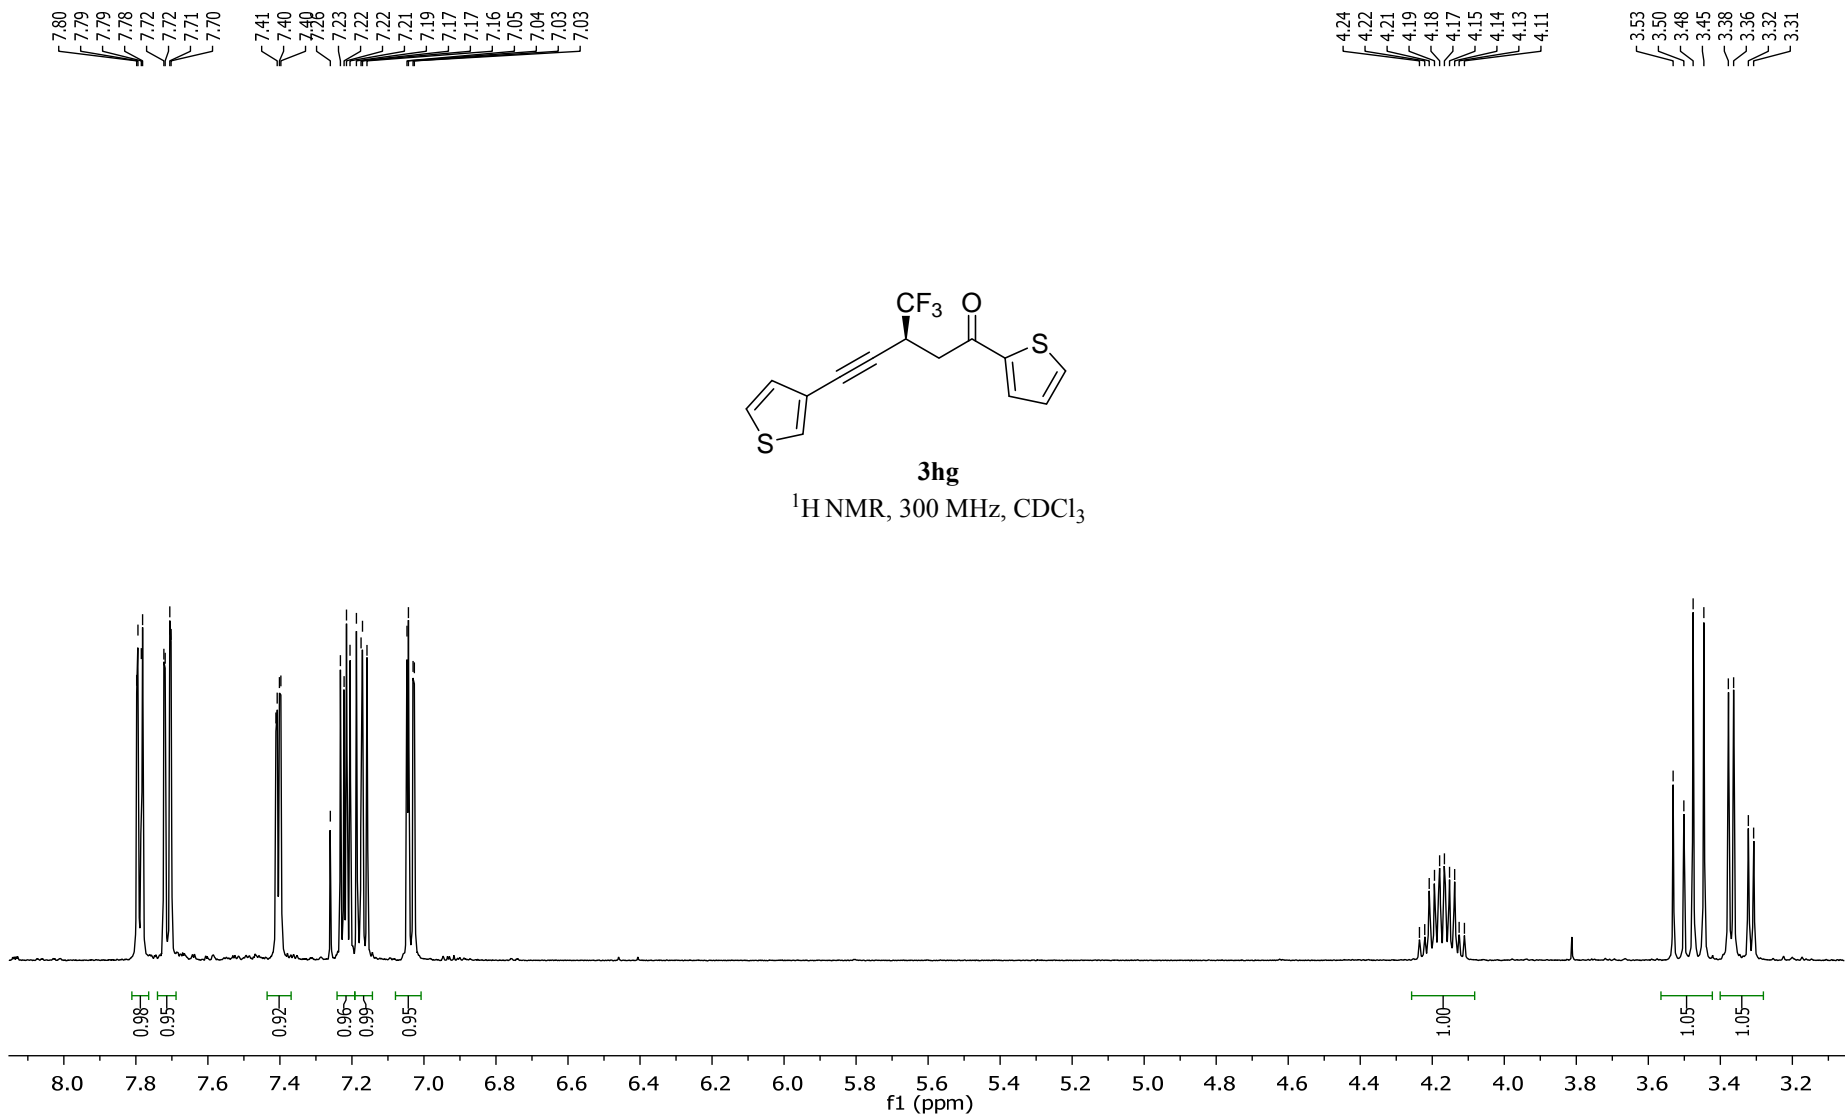

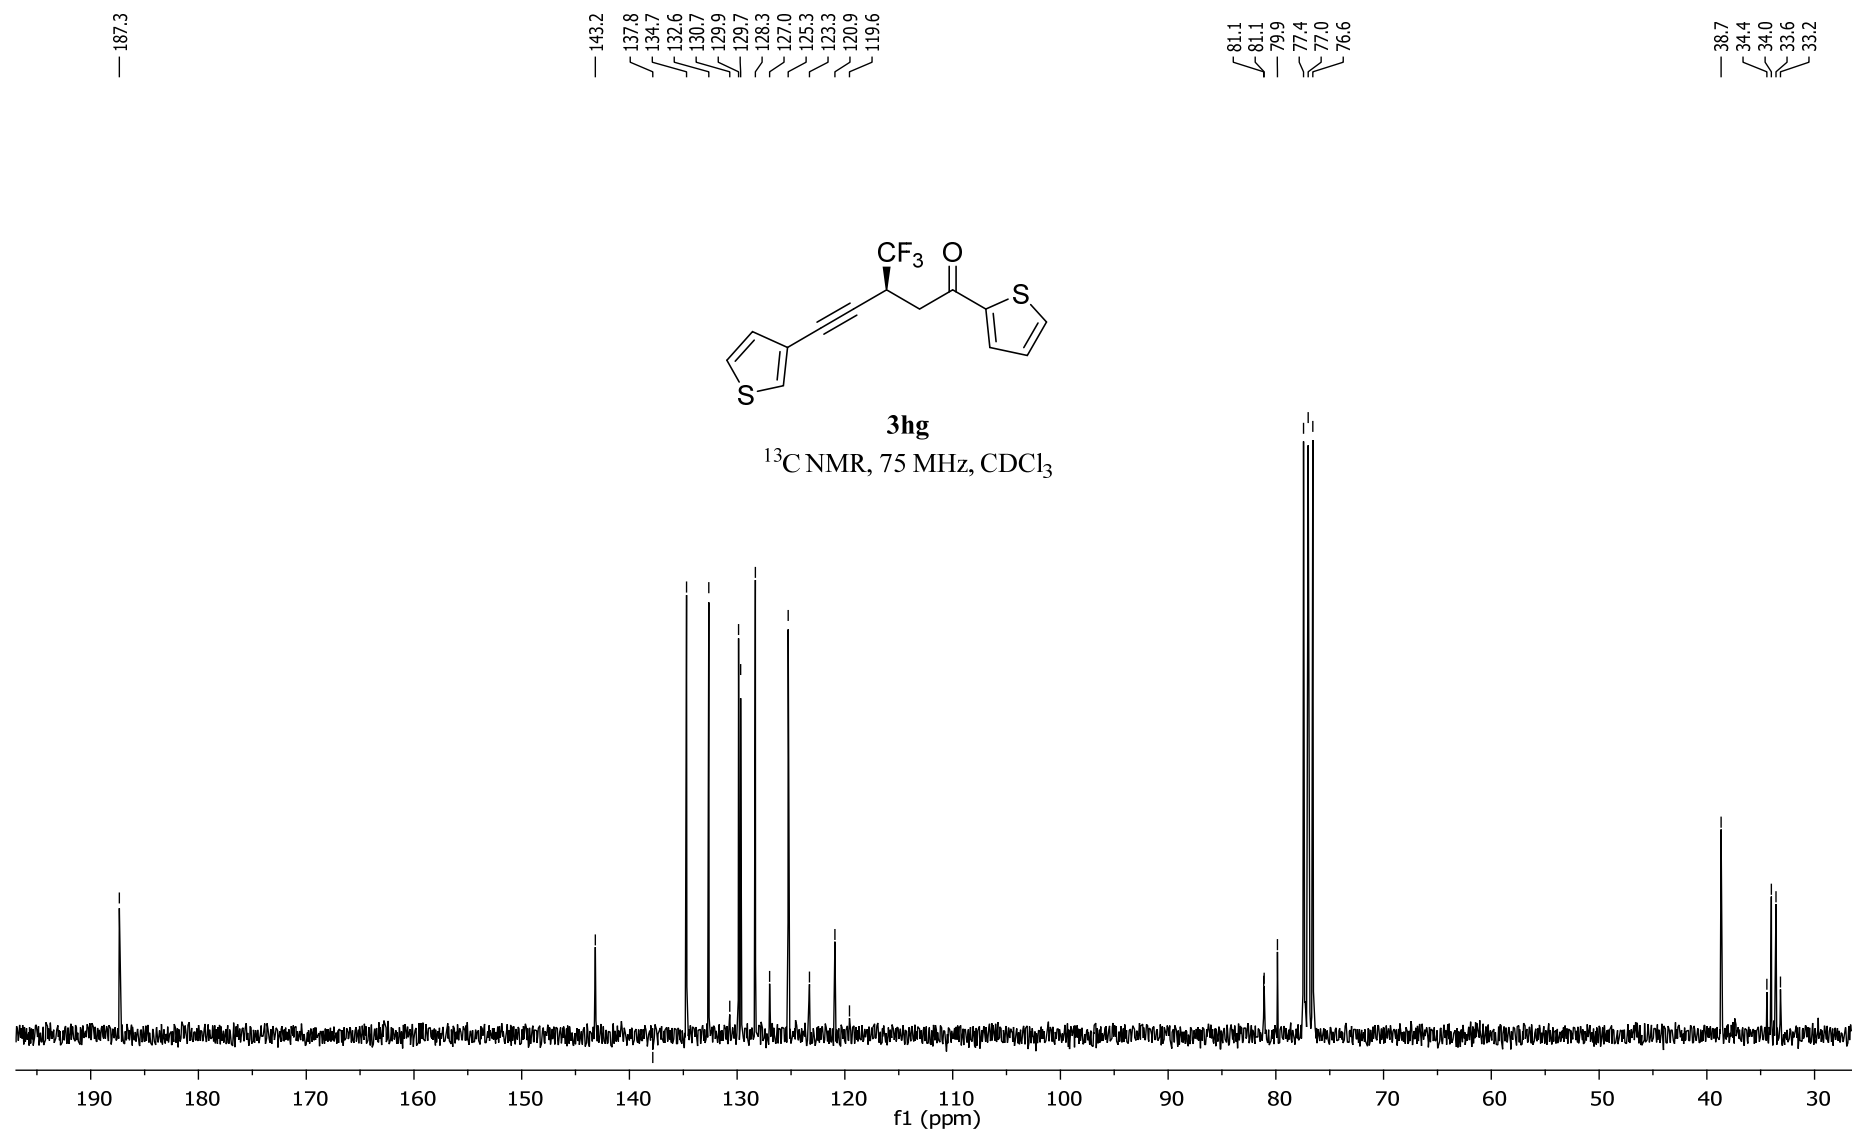

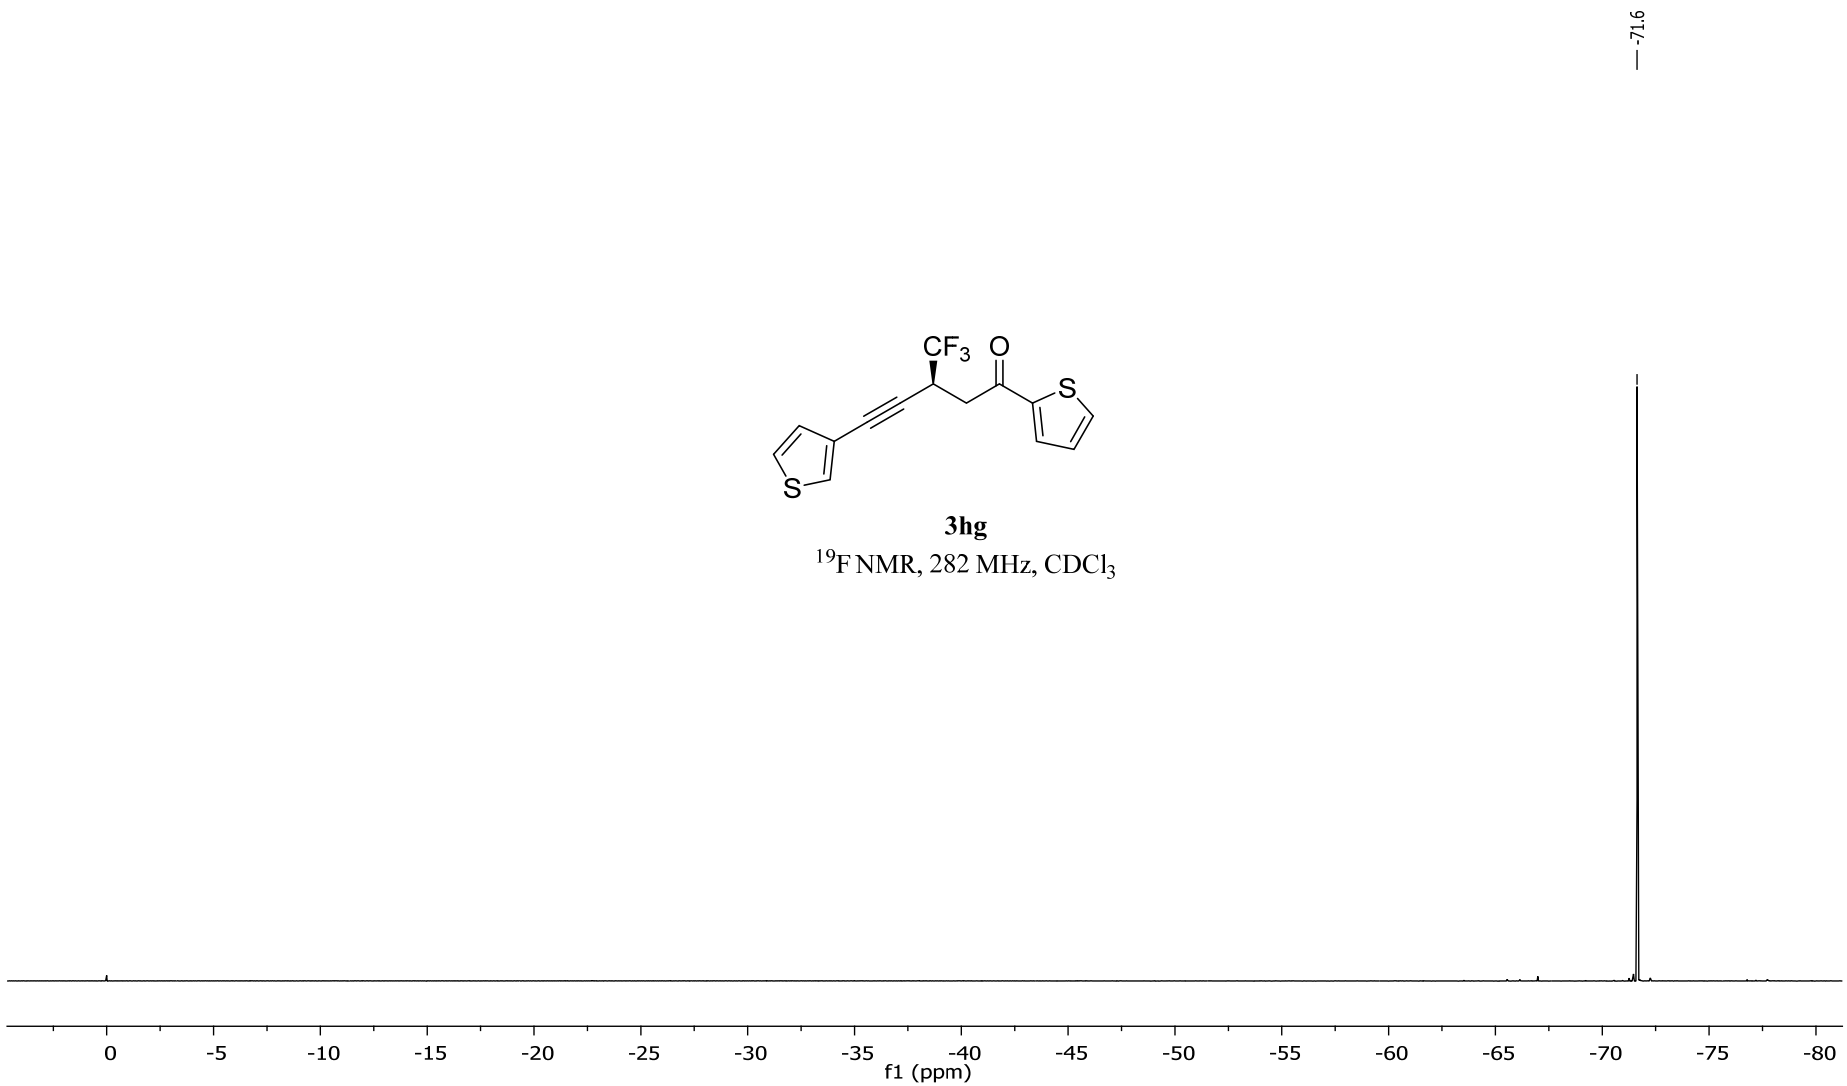

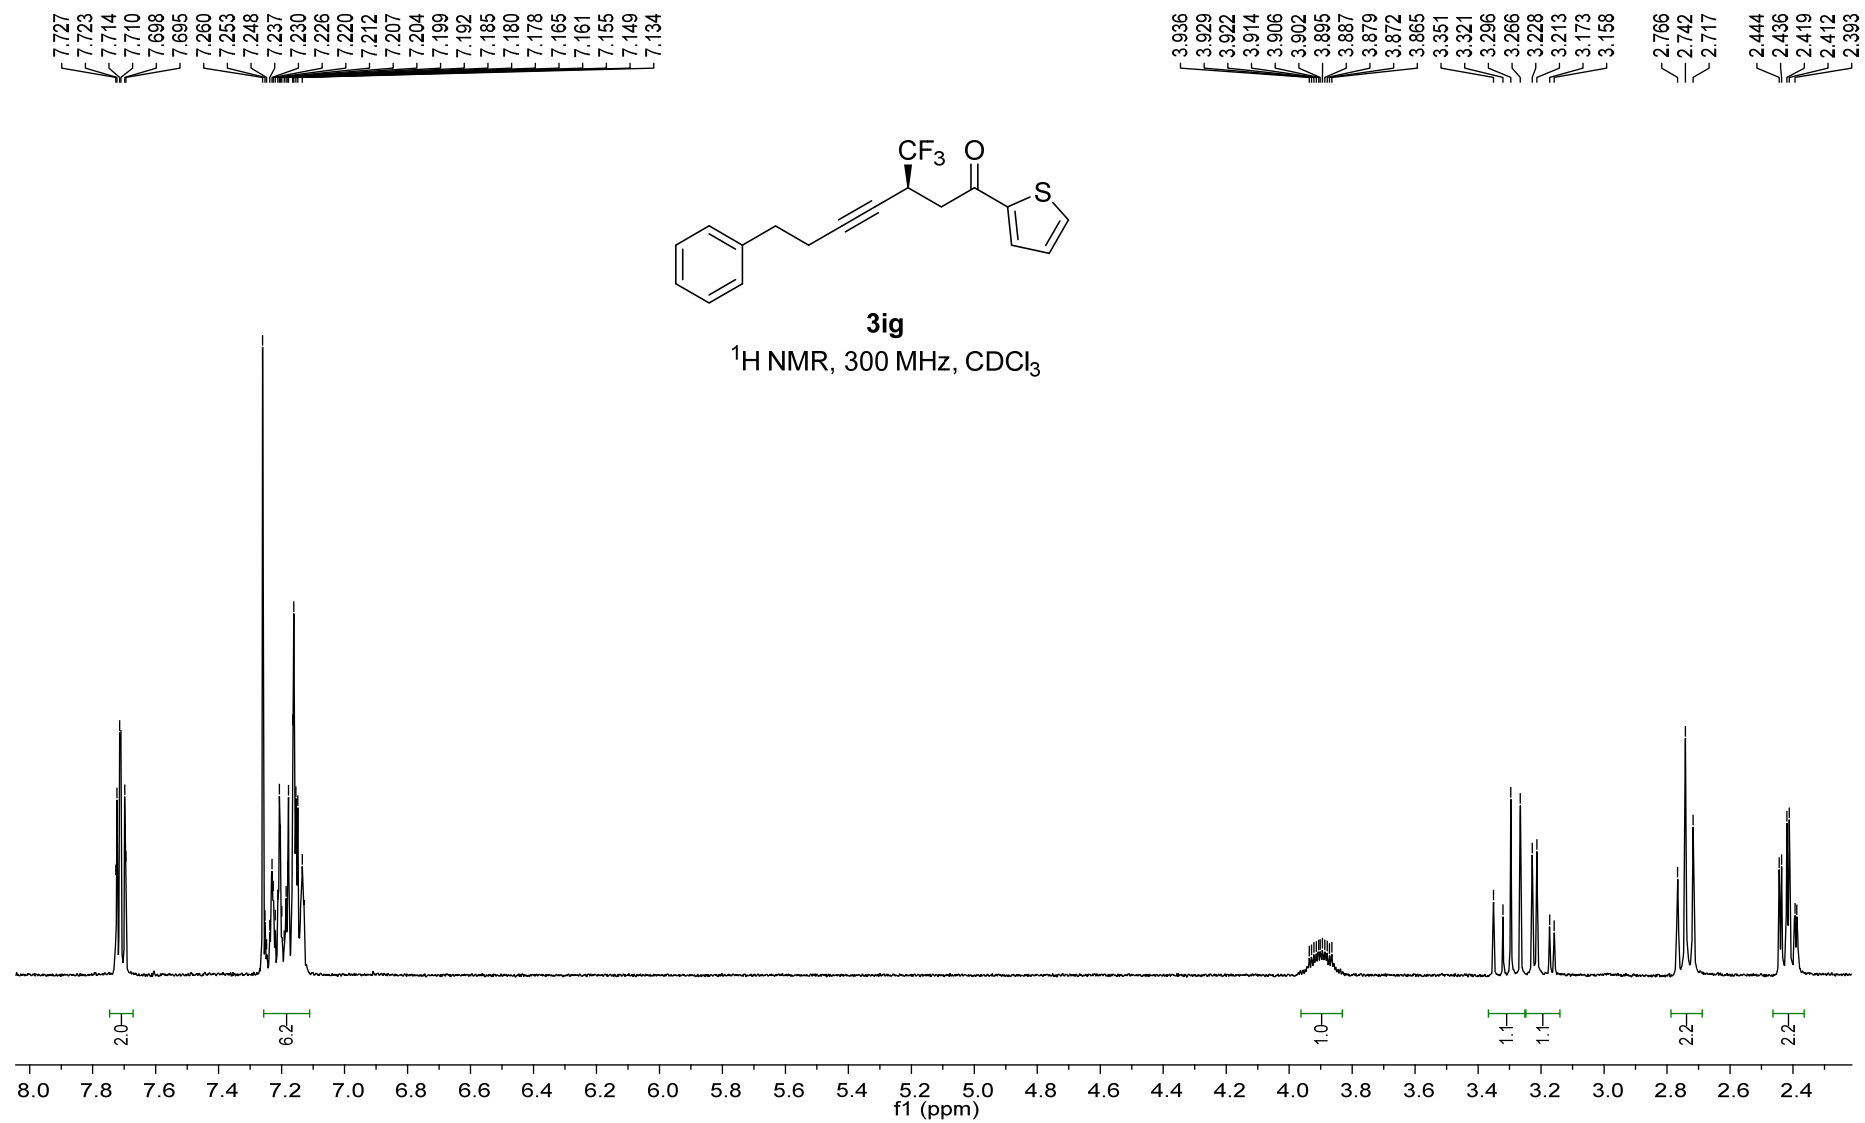

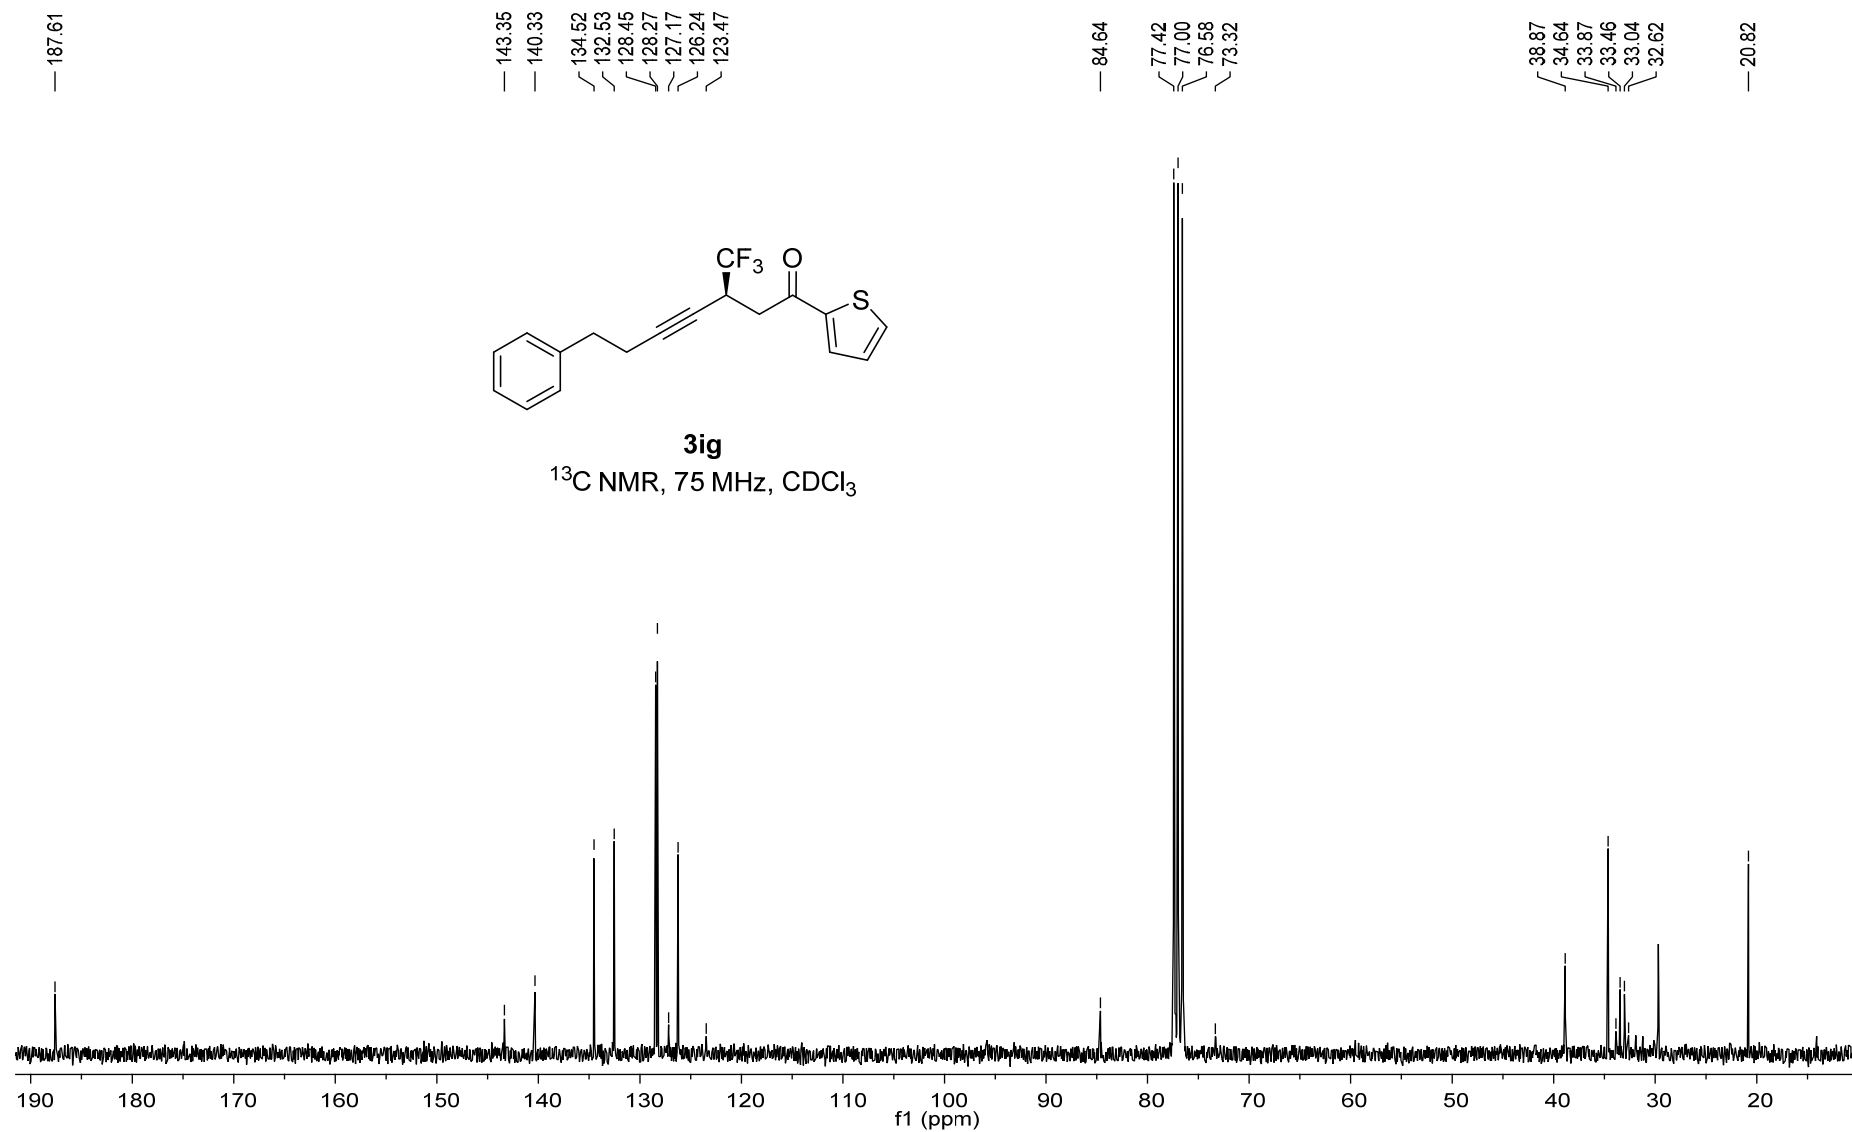

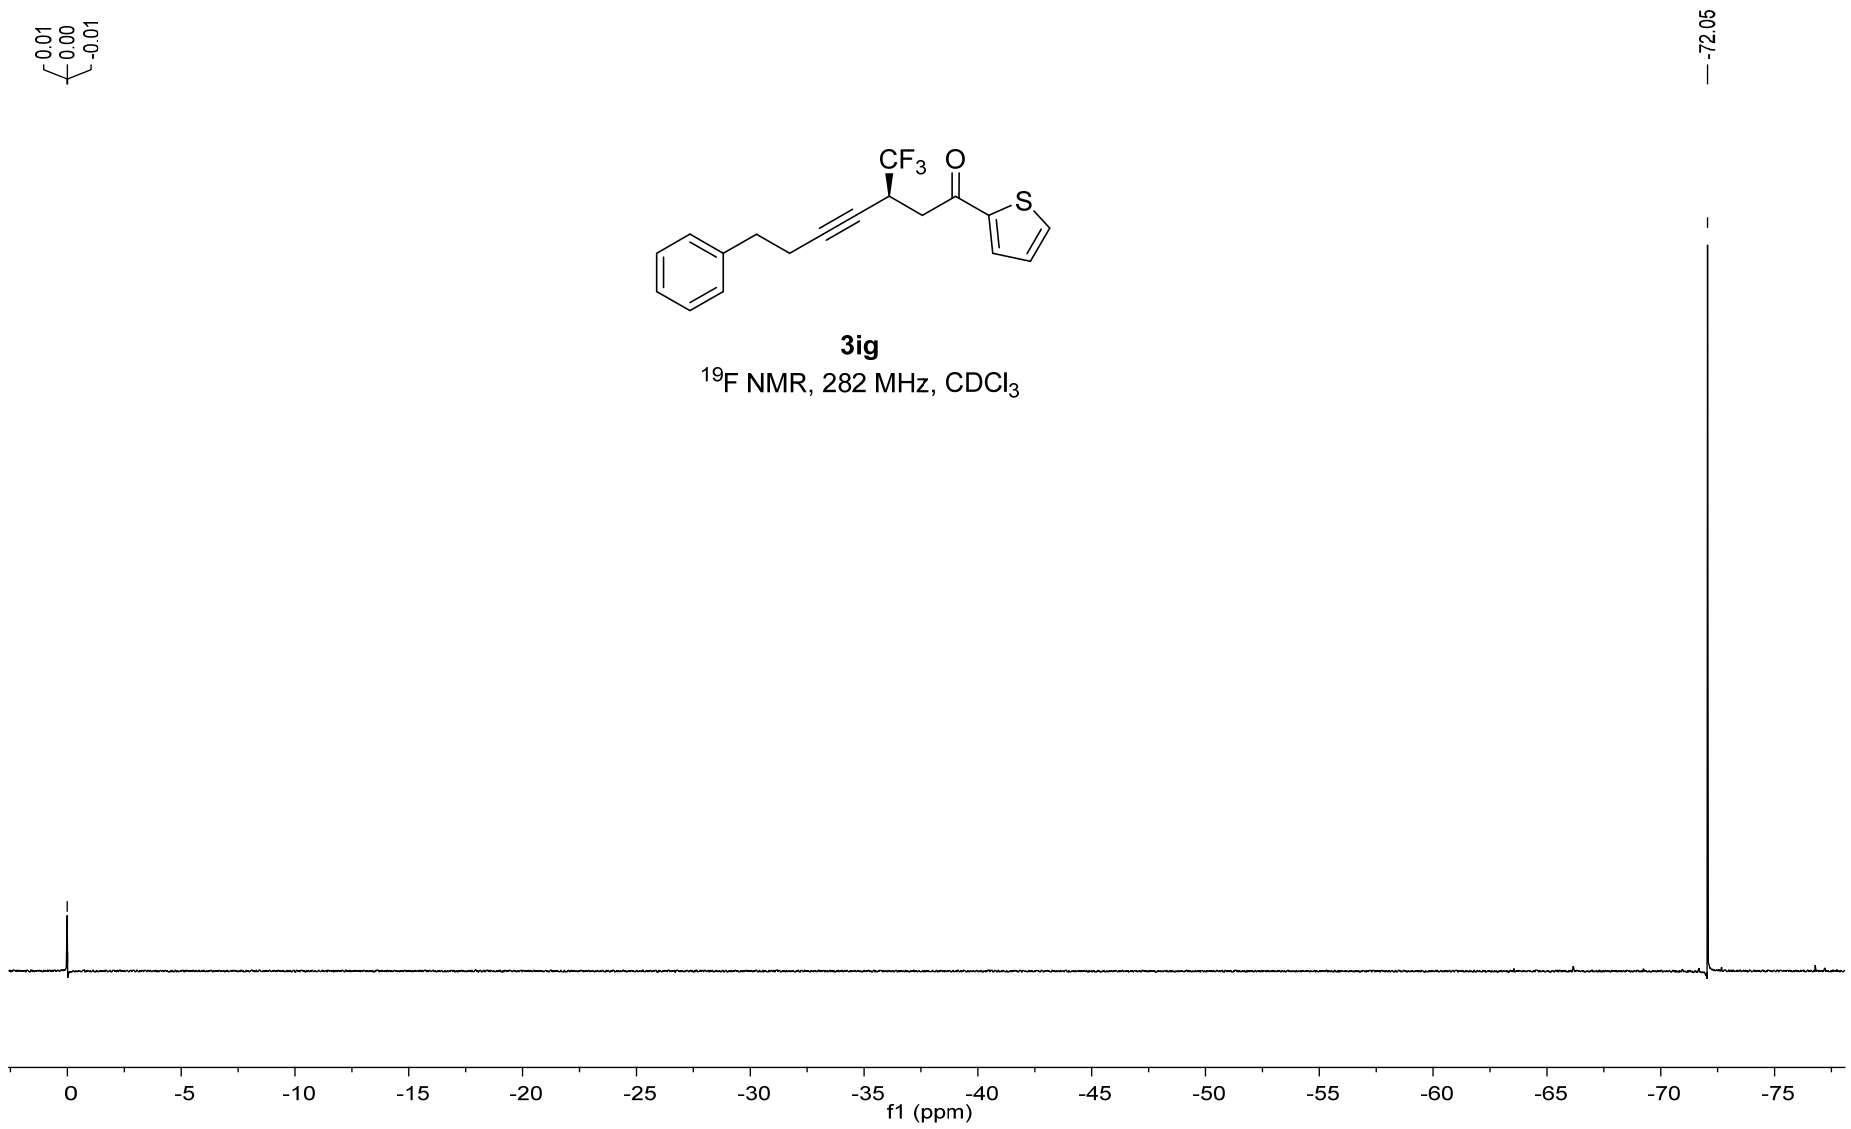

7.41  
7.41  
7.40  
7.40  
7.40  
7.39  
7.38  
7.34  
7.33  
7.32  
7.32  
7.31  
7.30  
7.29  
7.29  
7.27  
7.27  
7.26  
7.25  
7.24  
7.24  
7.21  
7.21  
7.19  
7.17

4.04  
4.02  
4.01  
3.99  
3.98  
3.97

2.99  
2.98  
2.97  
2.96  
2.95  
2.94  
2.93  
2.90  
2.88  
2.86  
2.86  
2.84  
2.84  
2.82  
2.81  
2.81

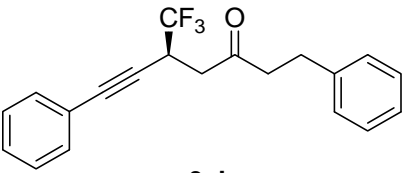

**3ah**

<sup>1</sup>H NMR, 300 MHz, CDCl<sub>3</sub>

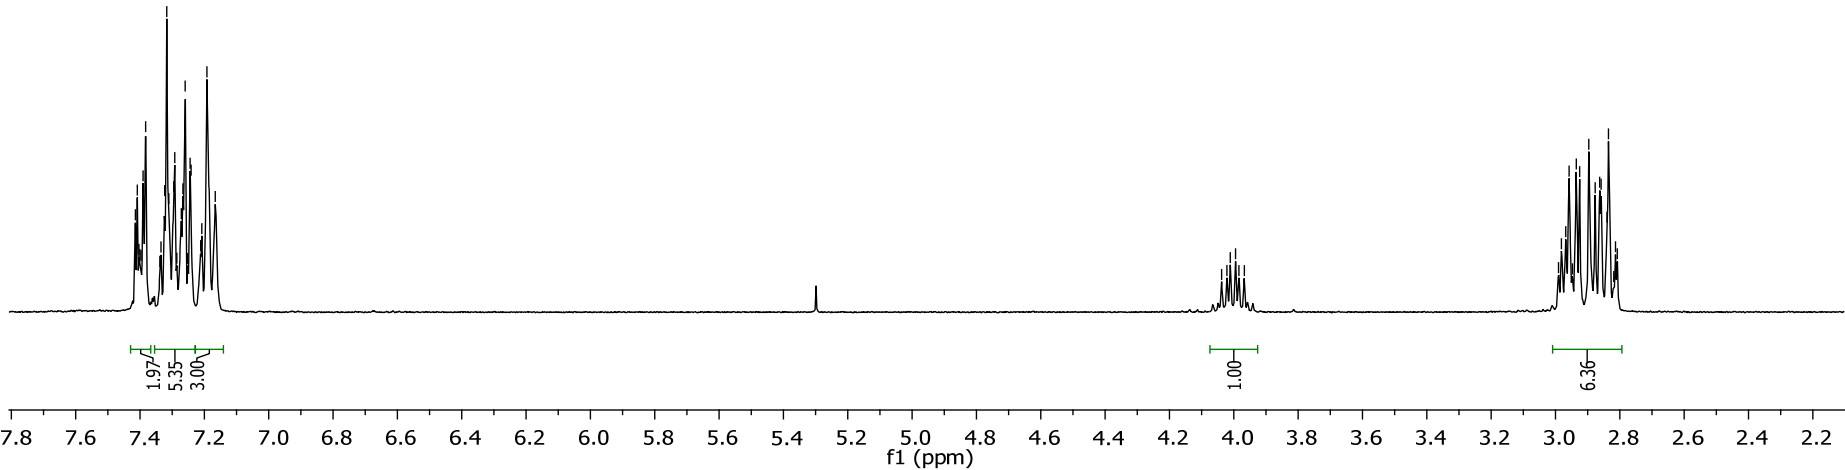

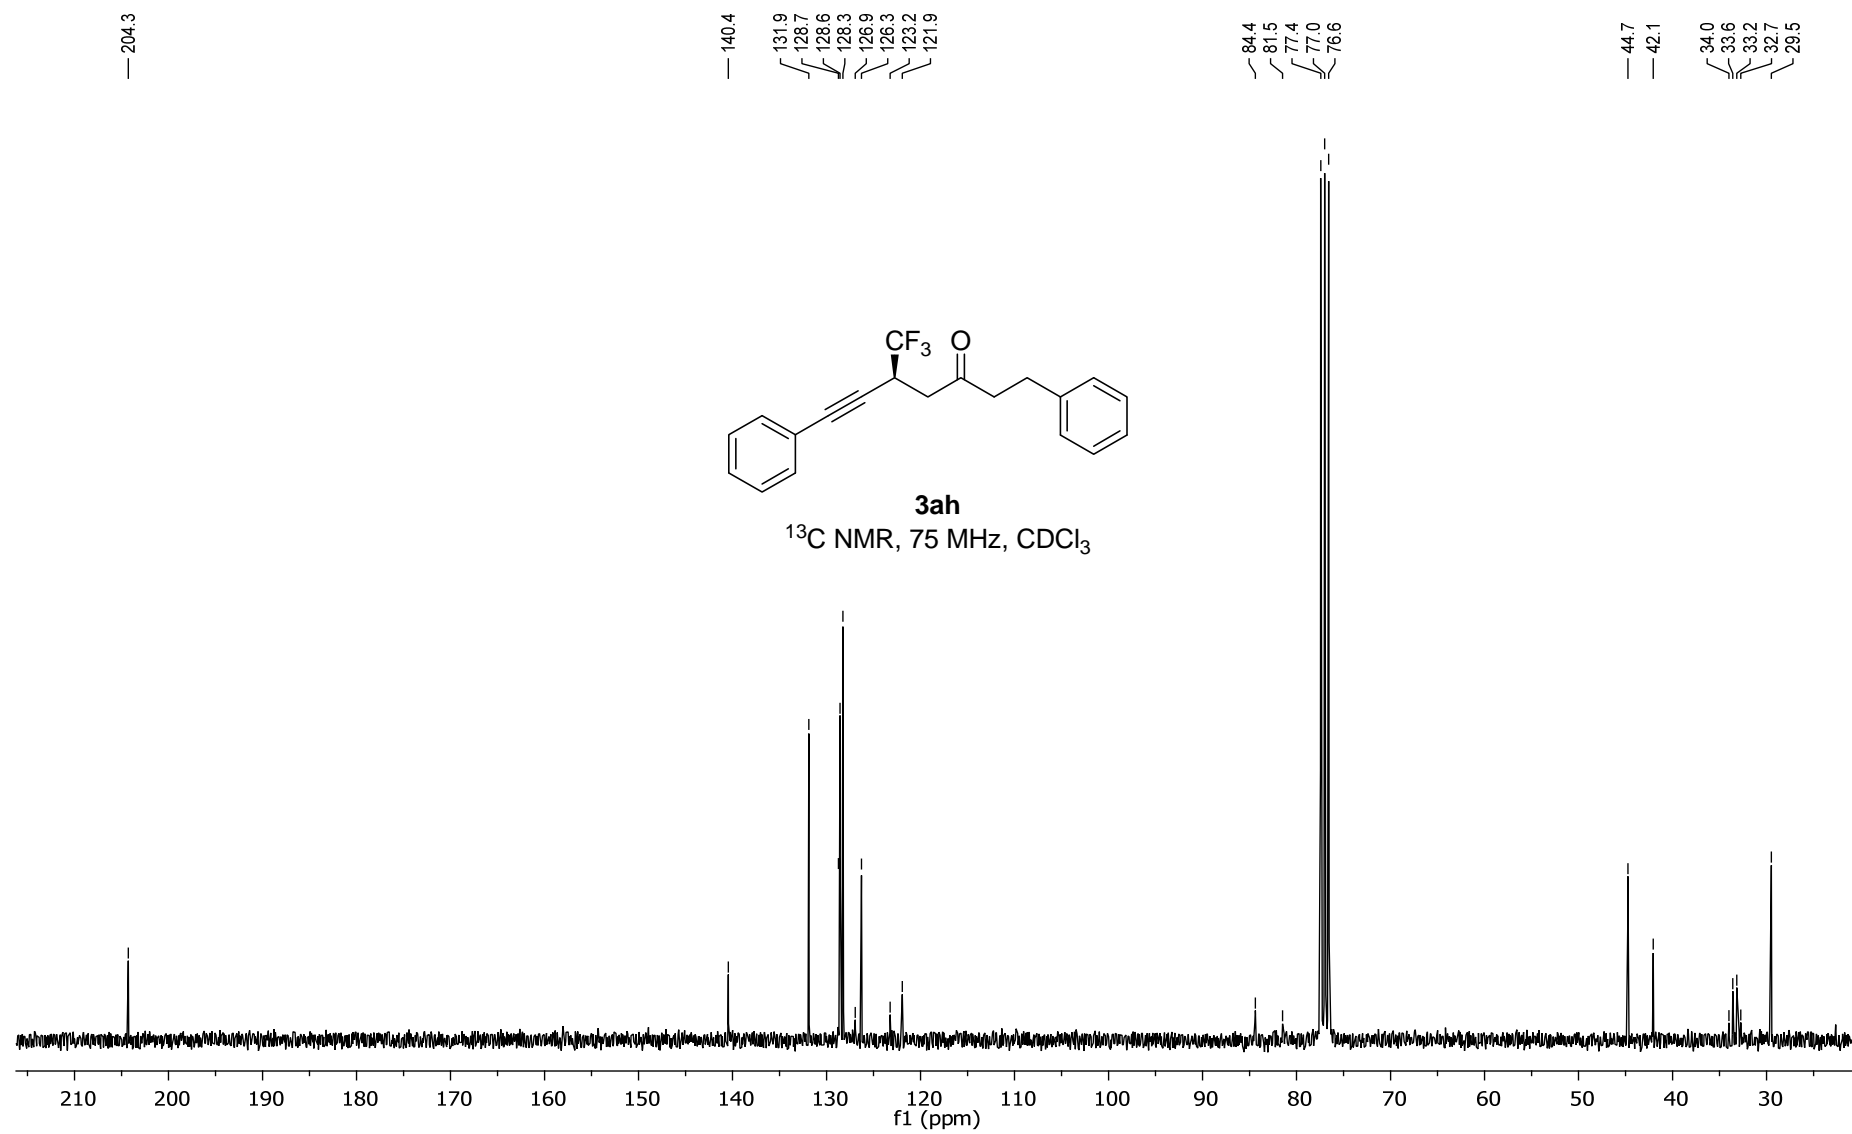

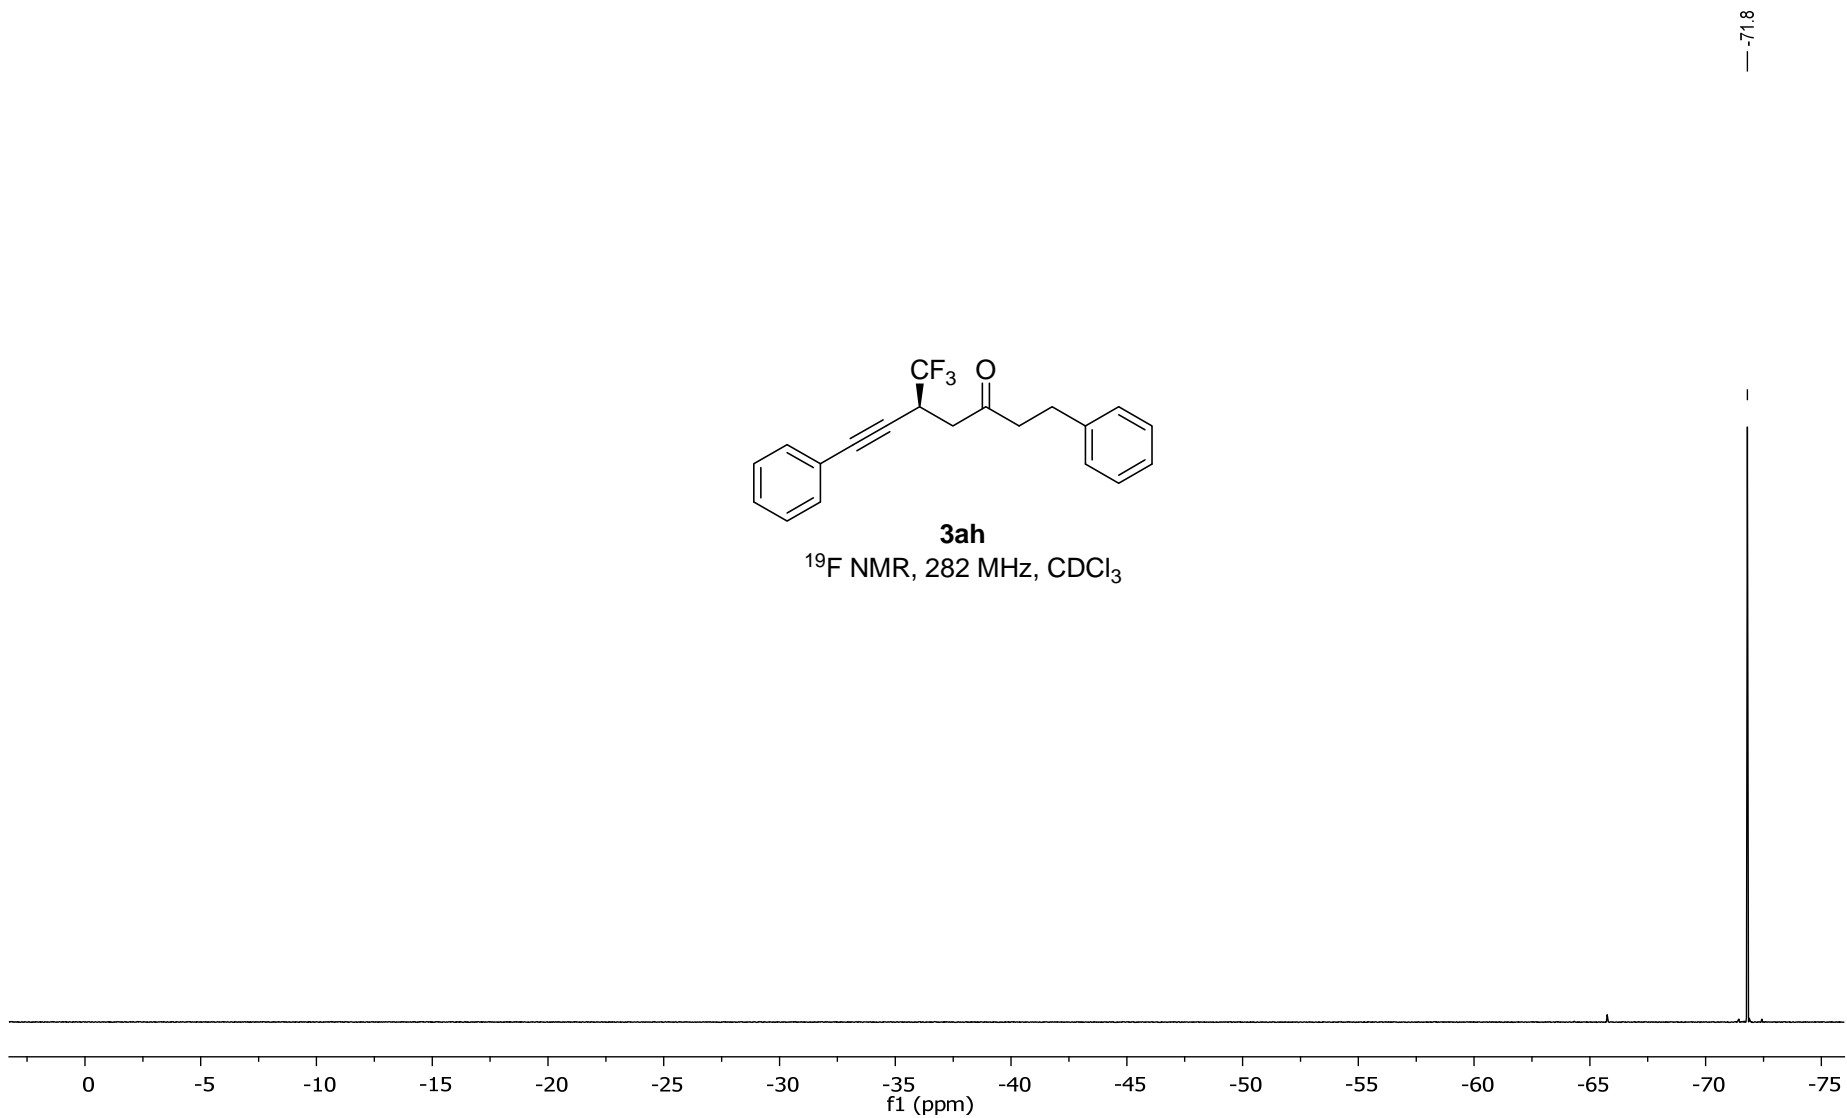

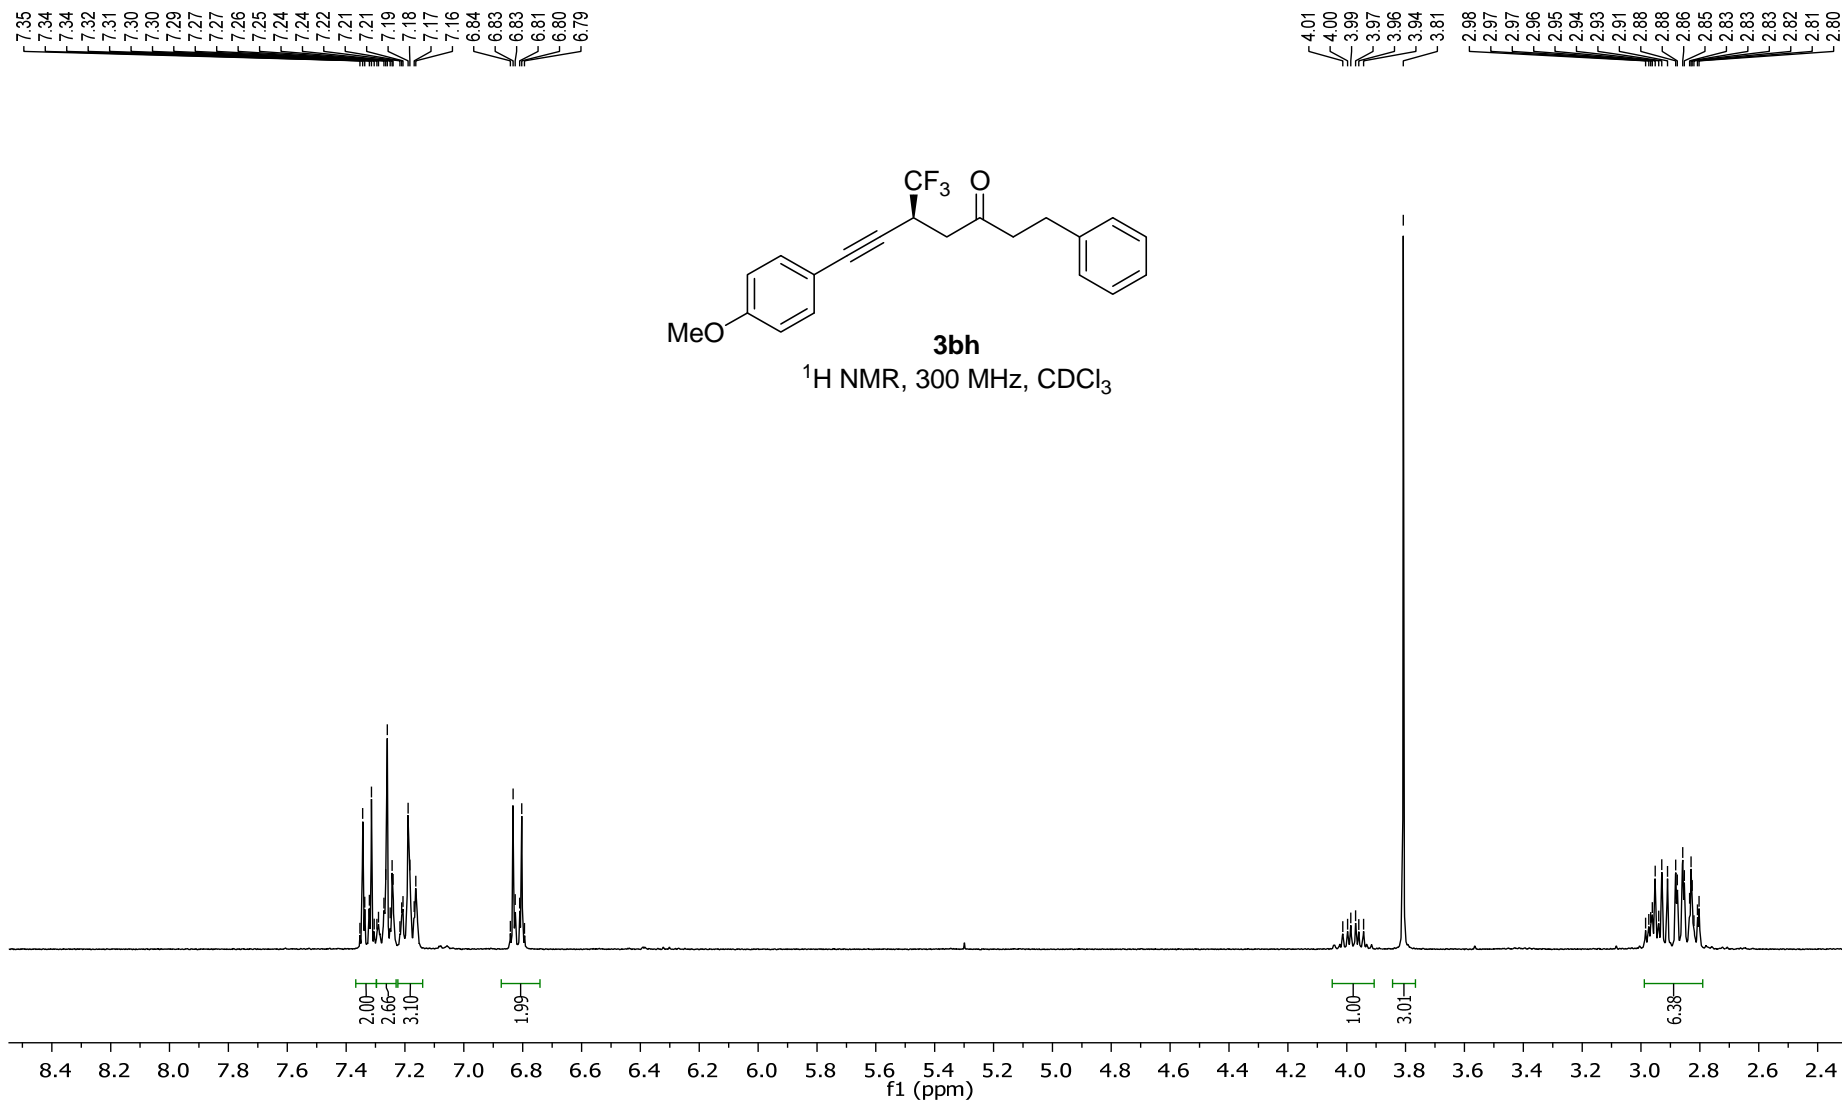

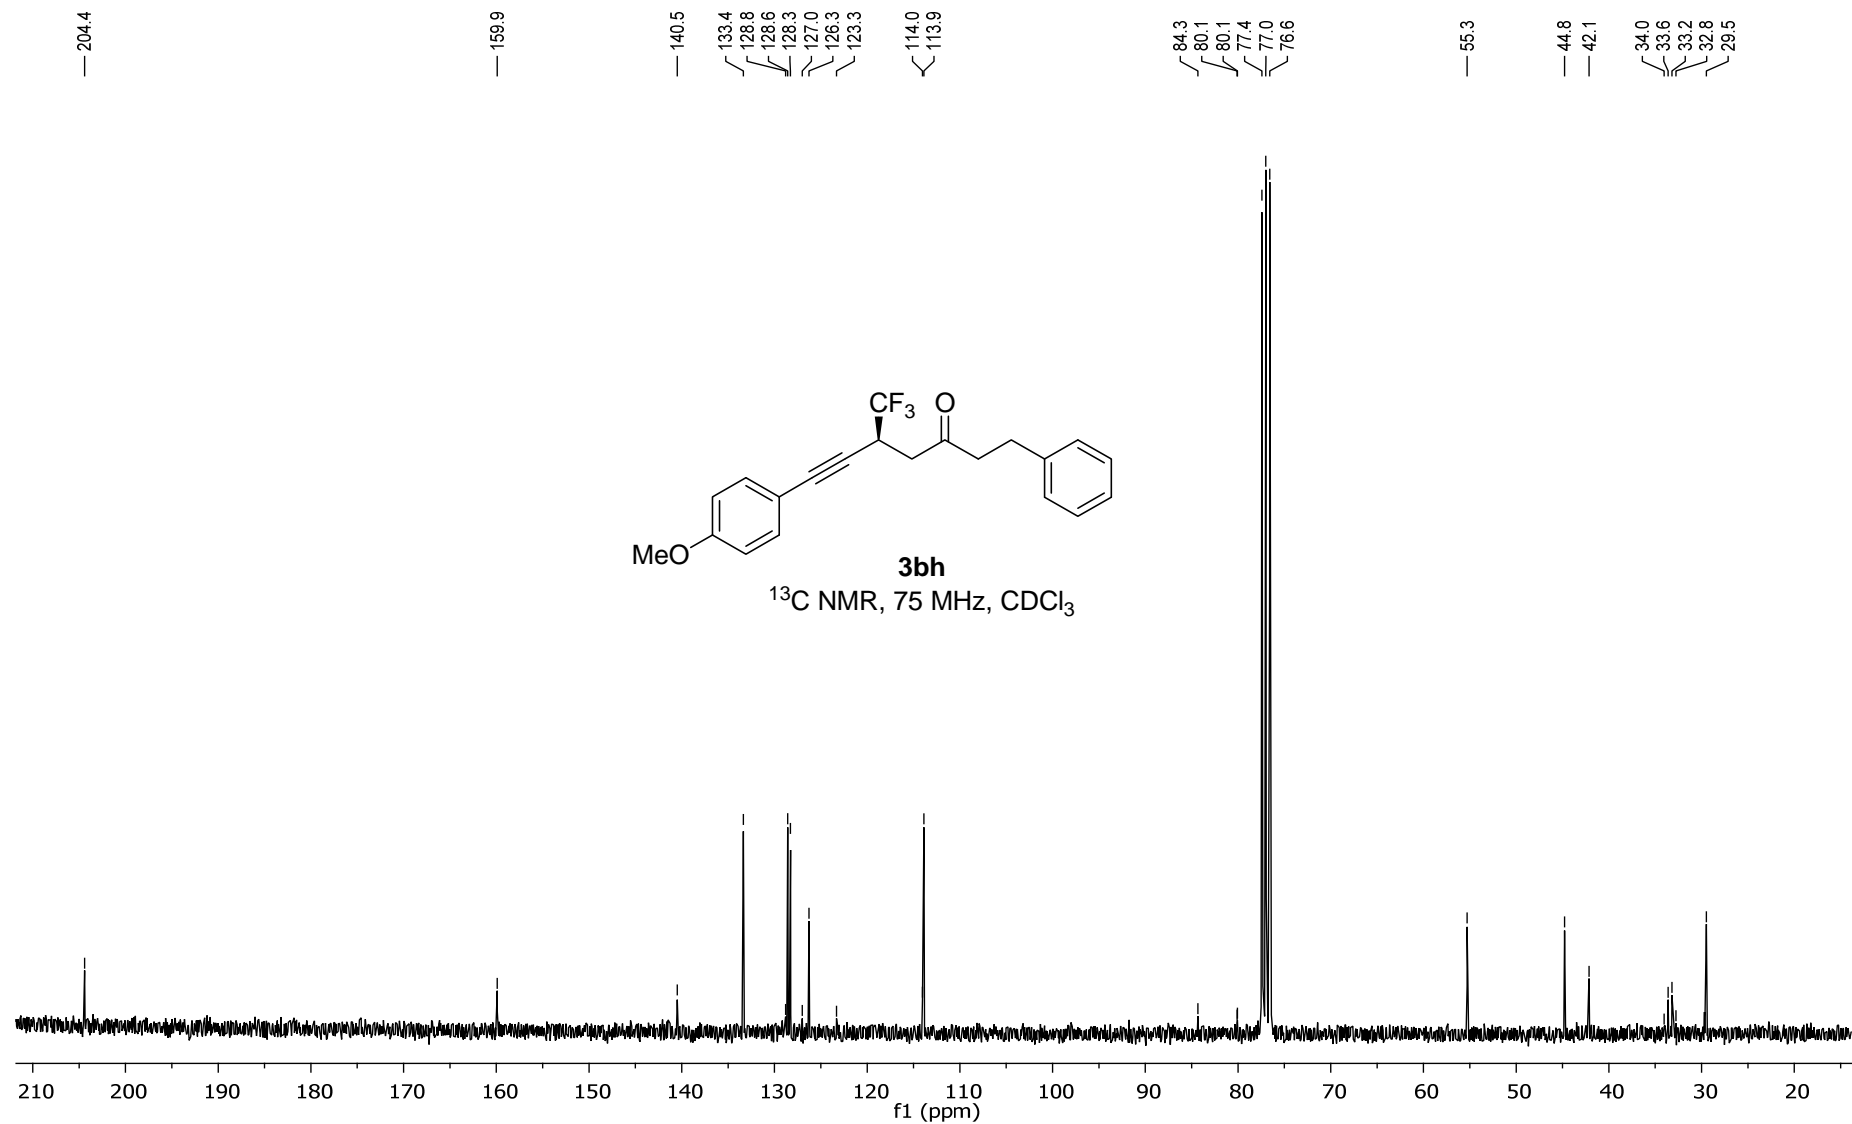

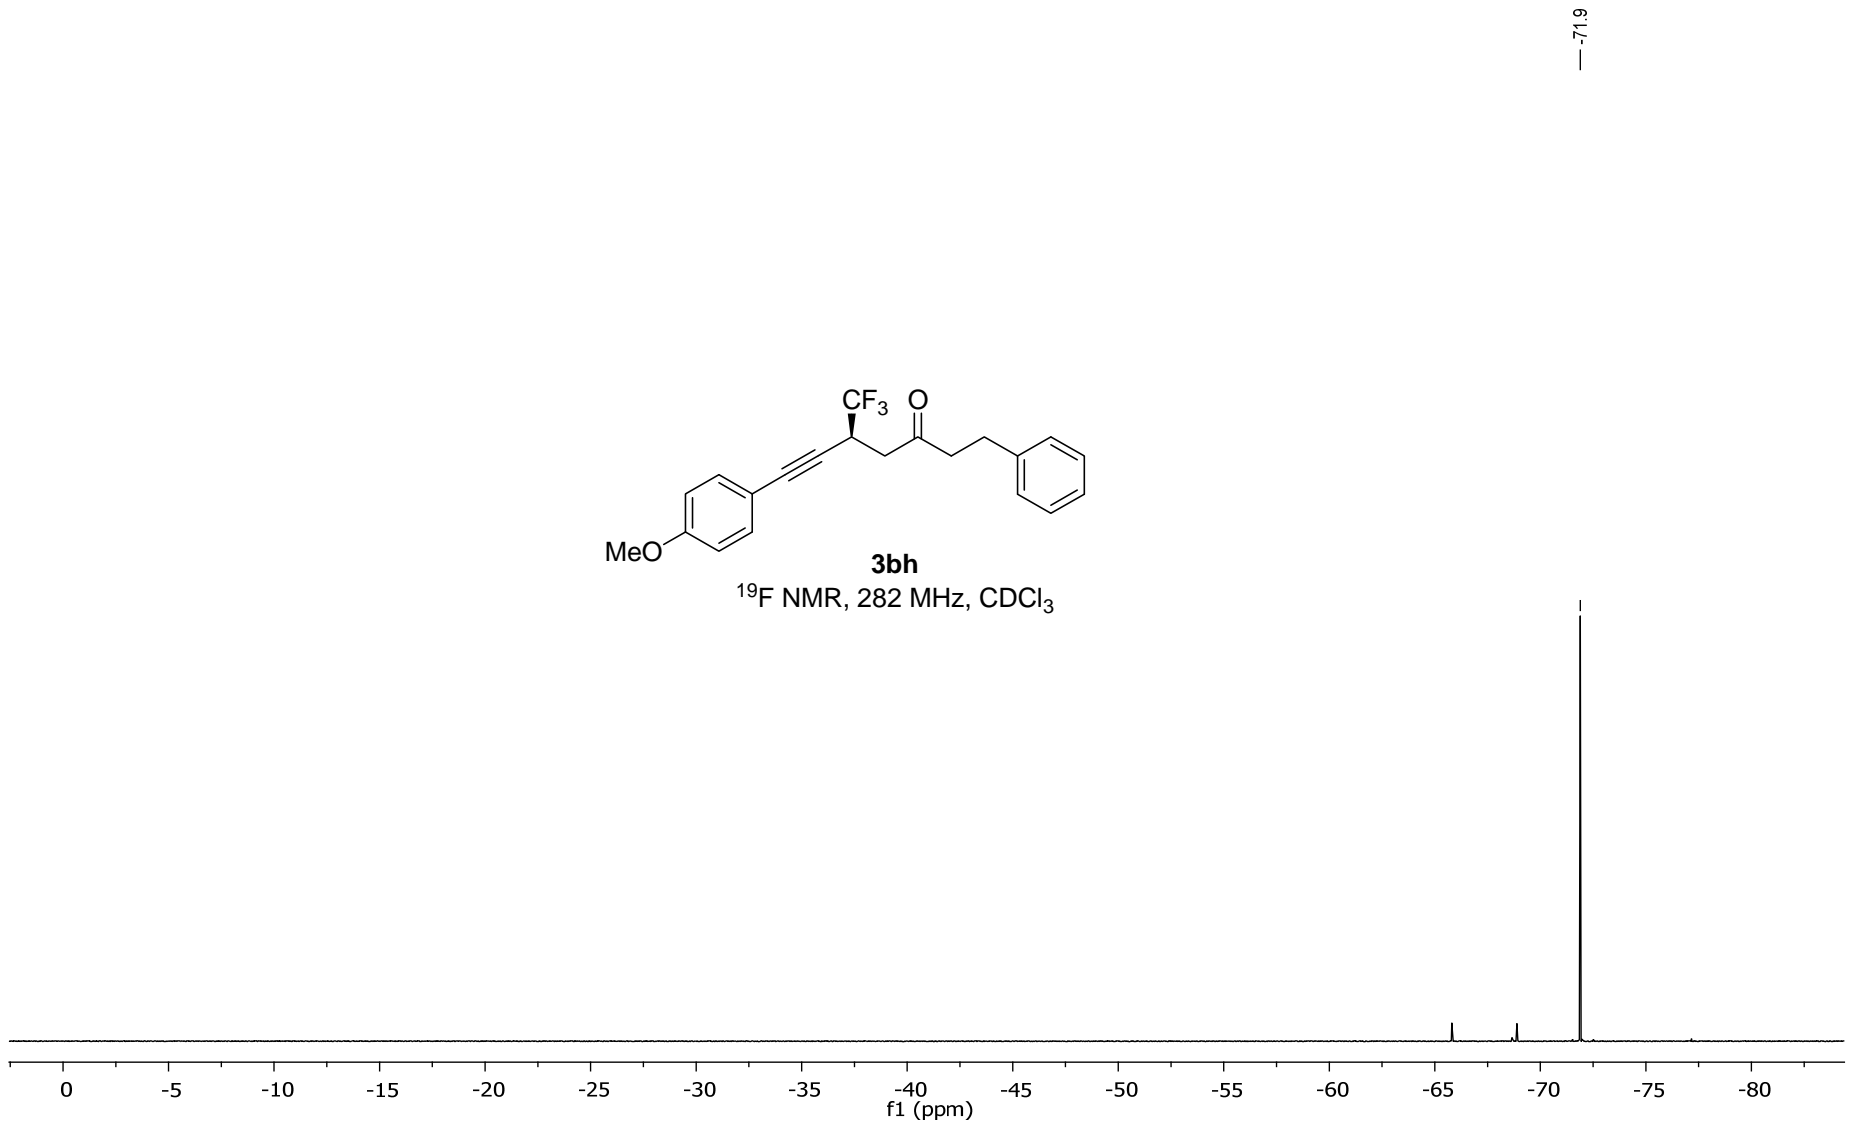

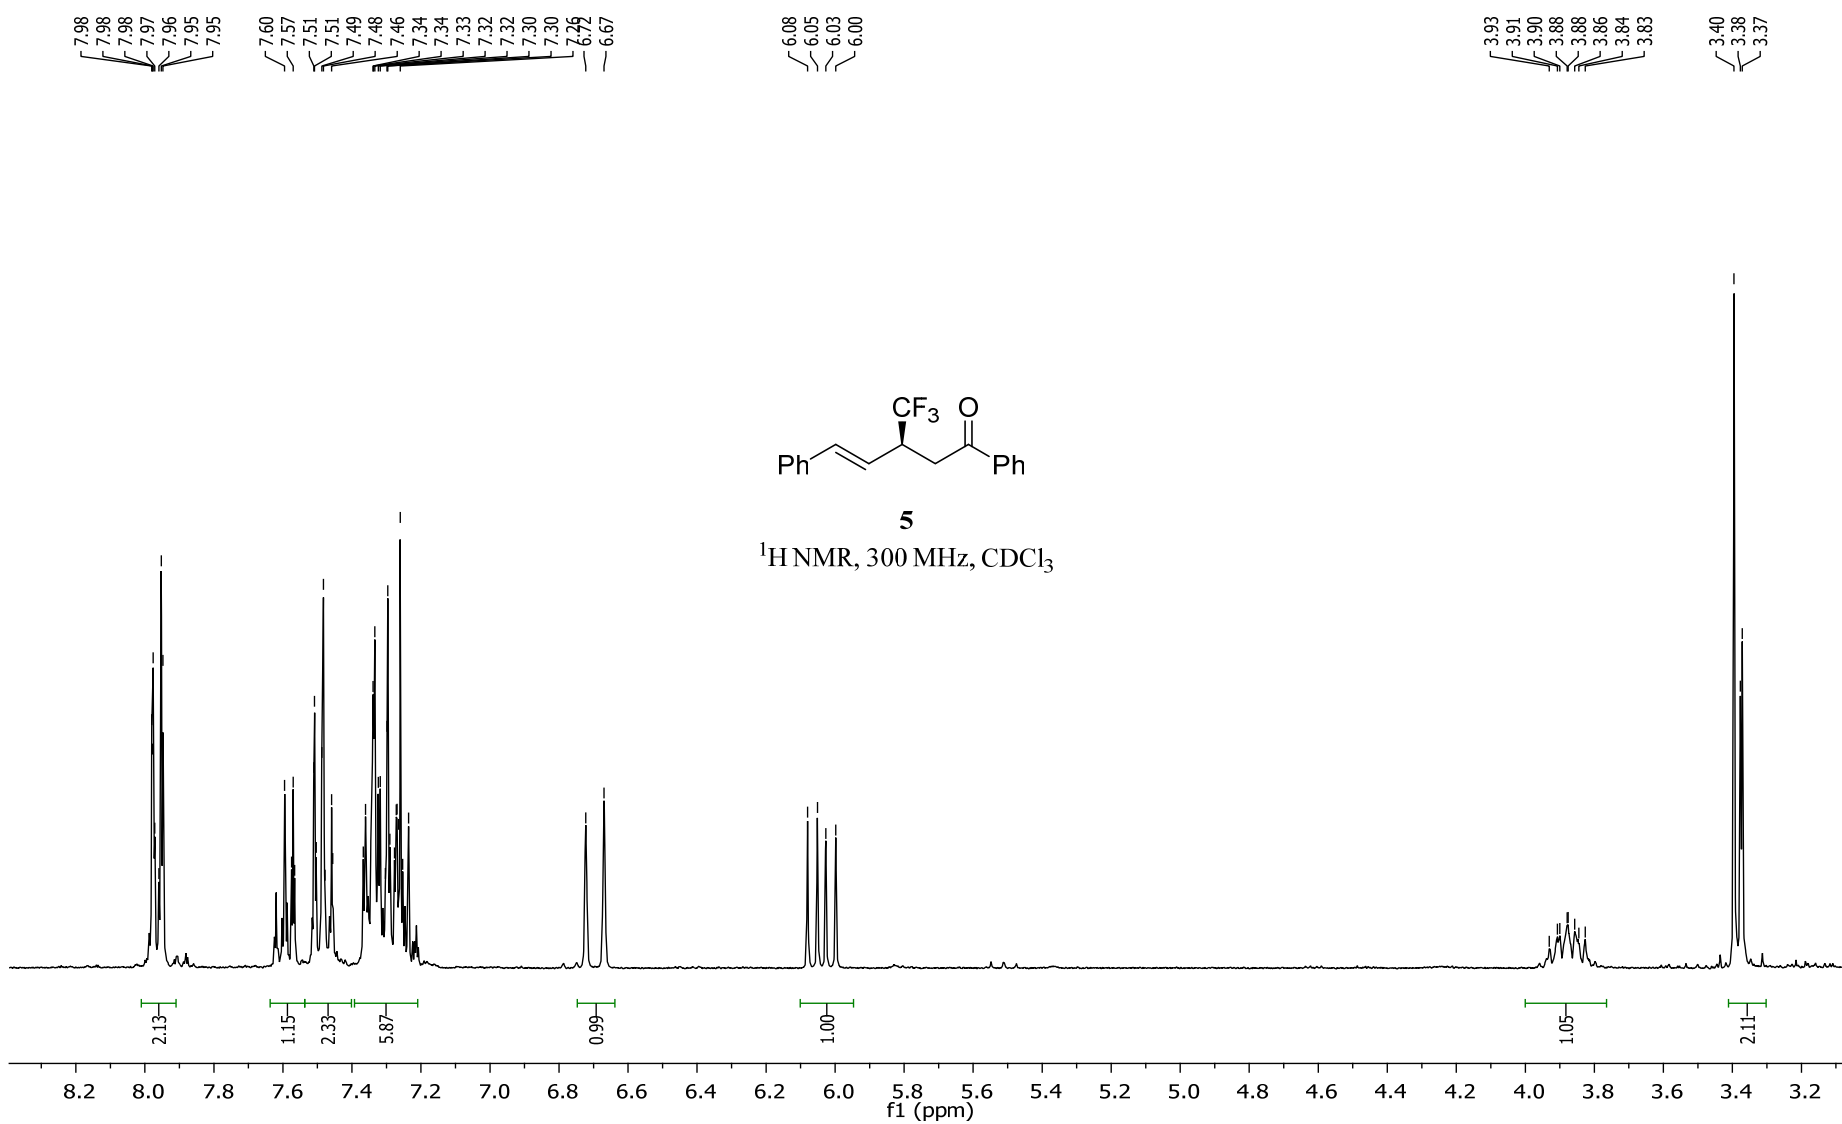

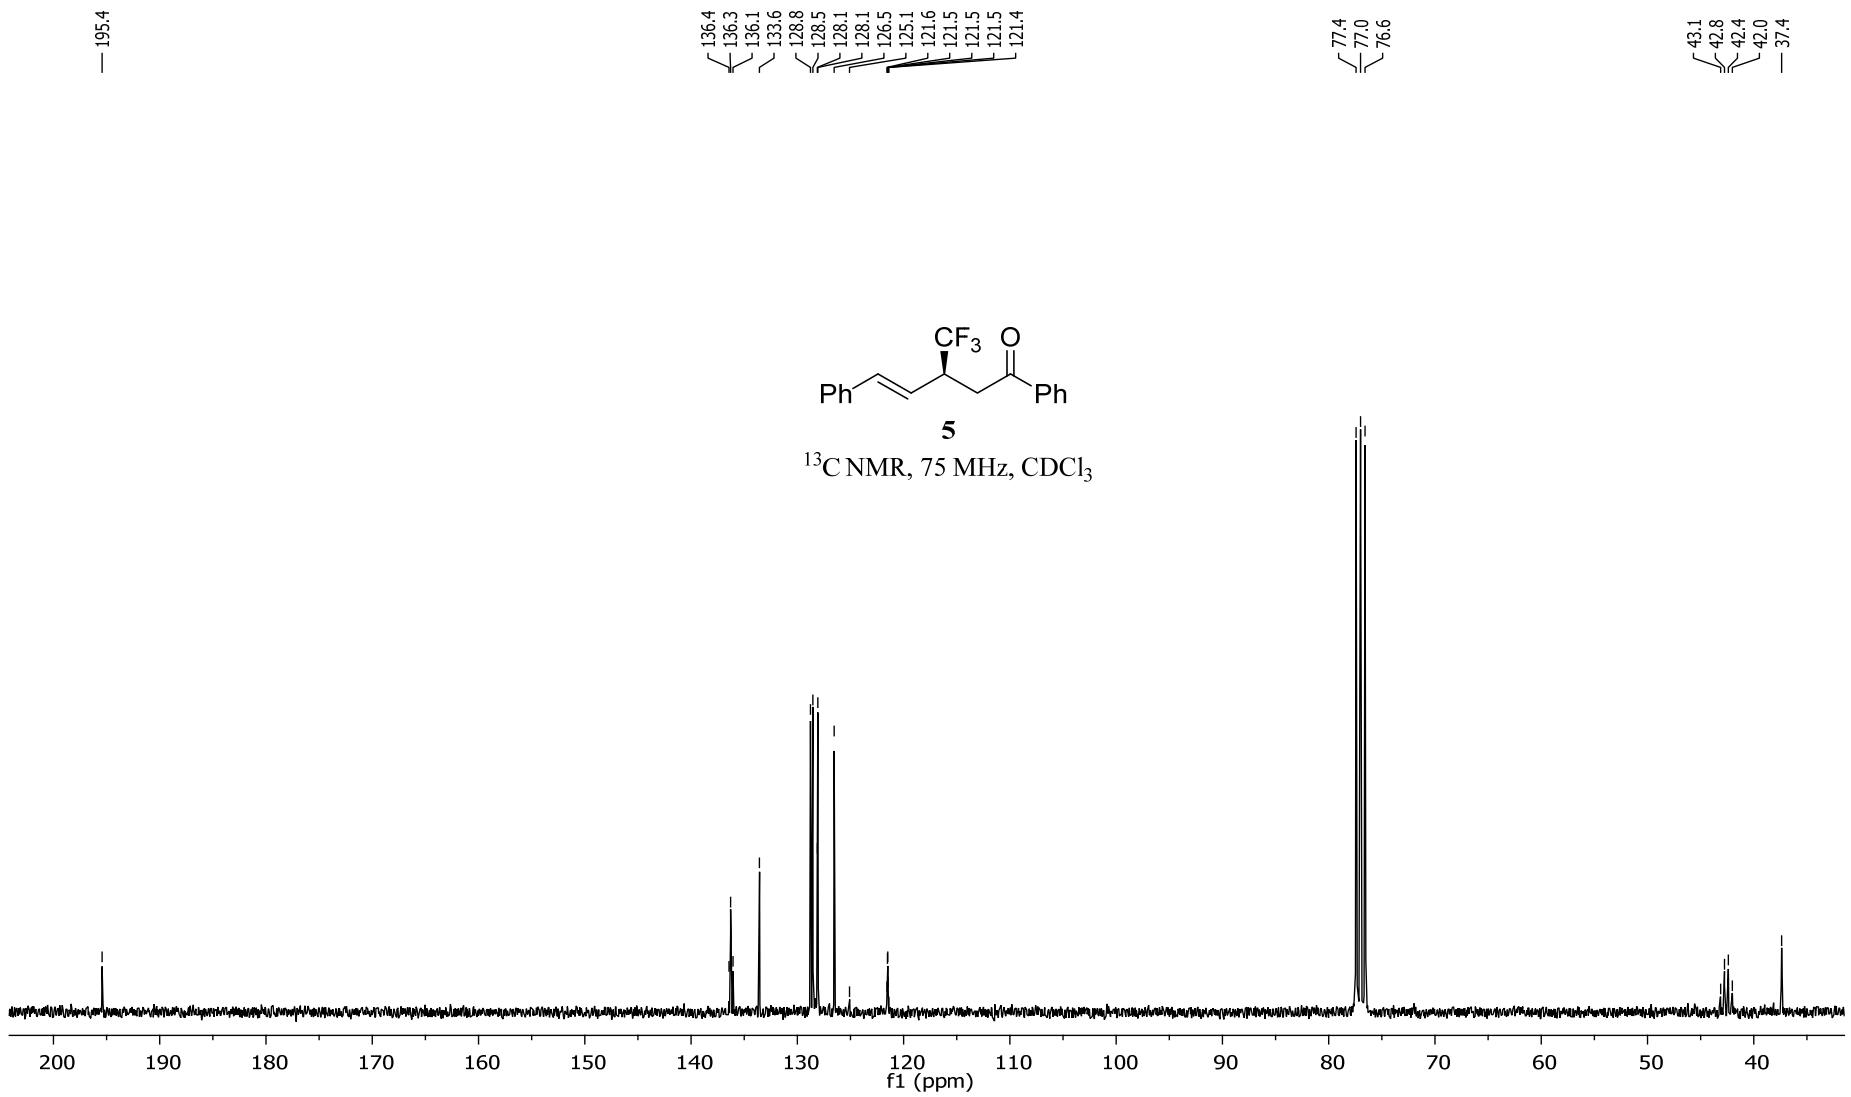

— -71.2

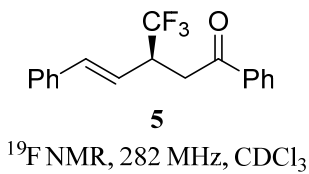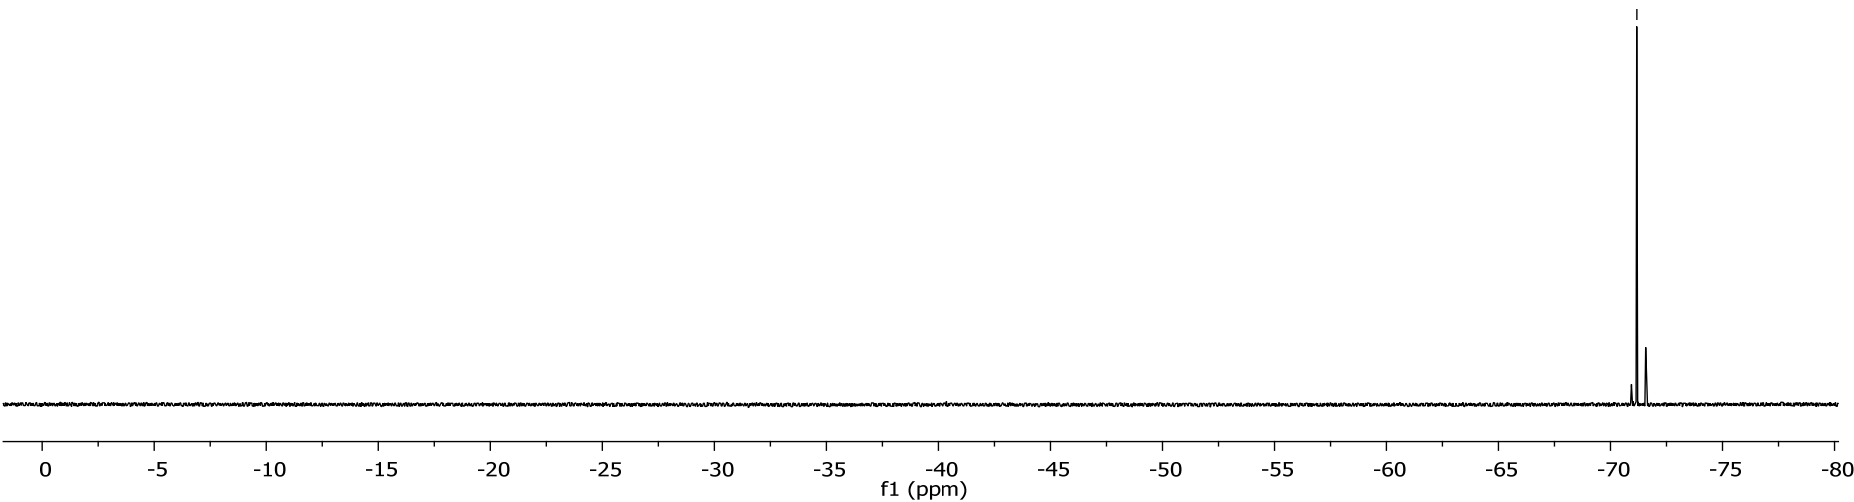

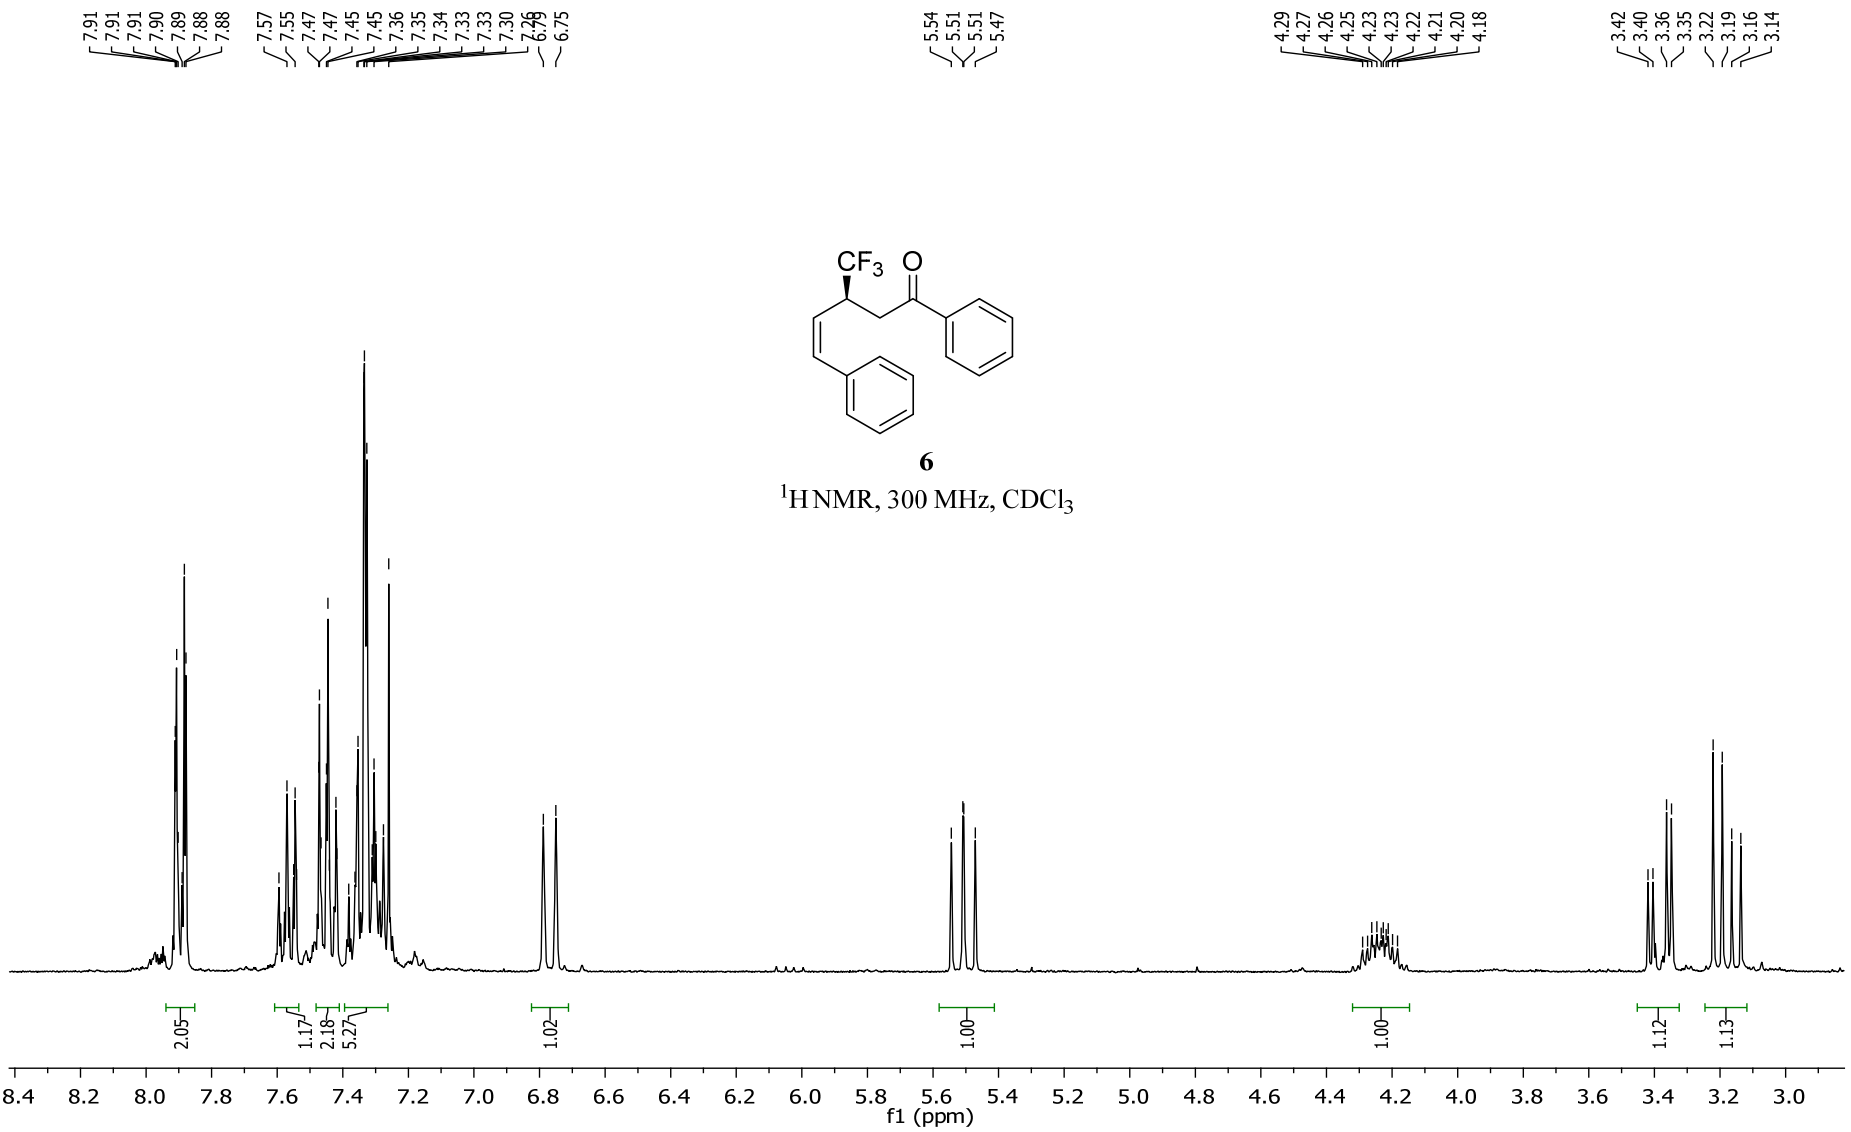

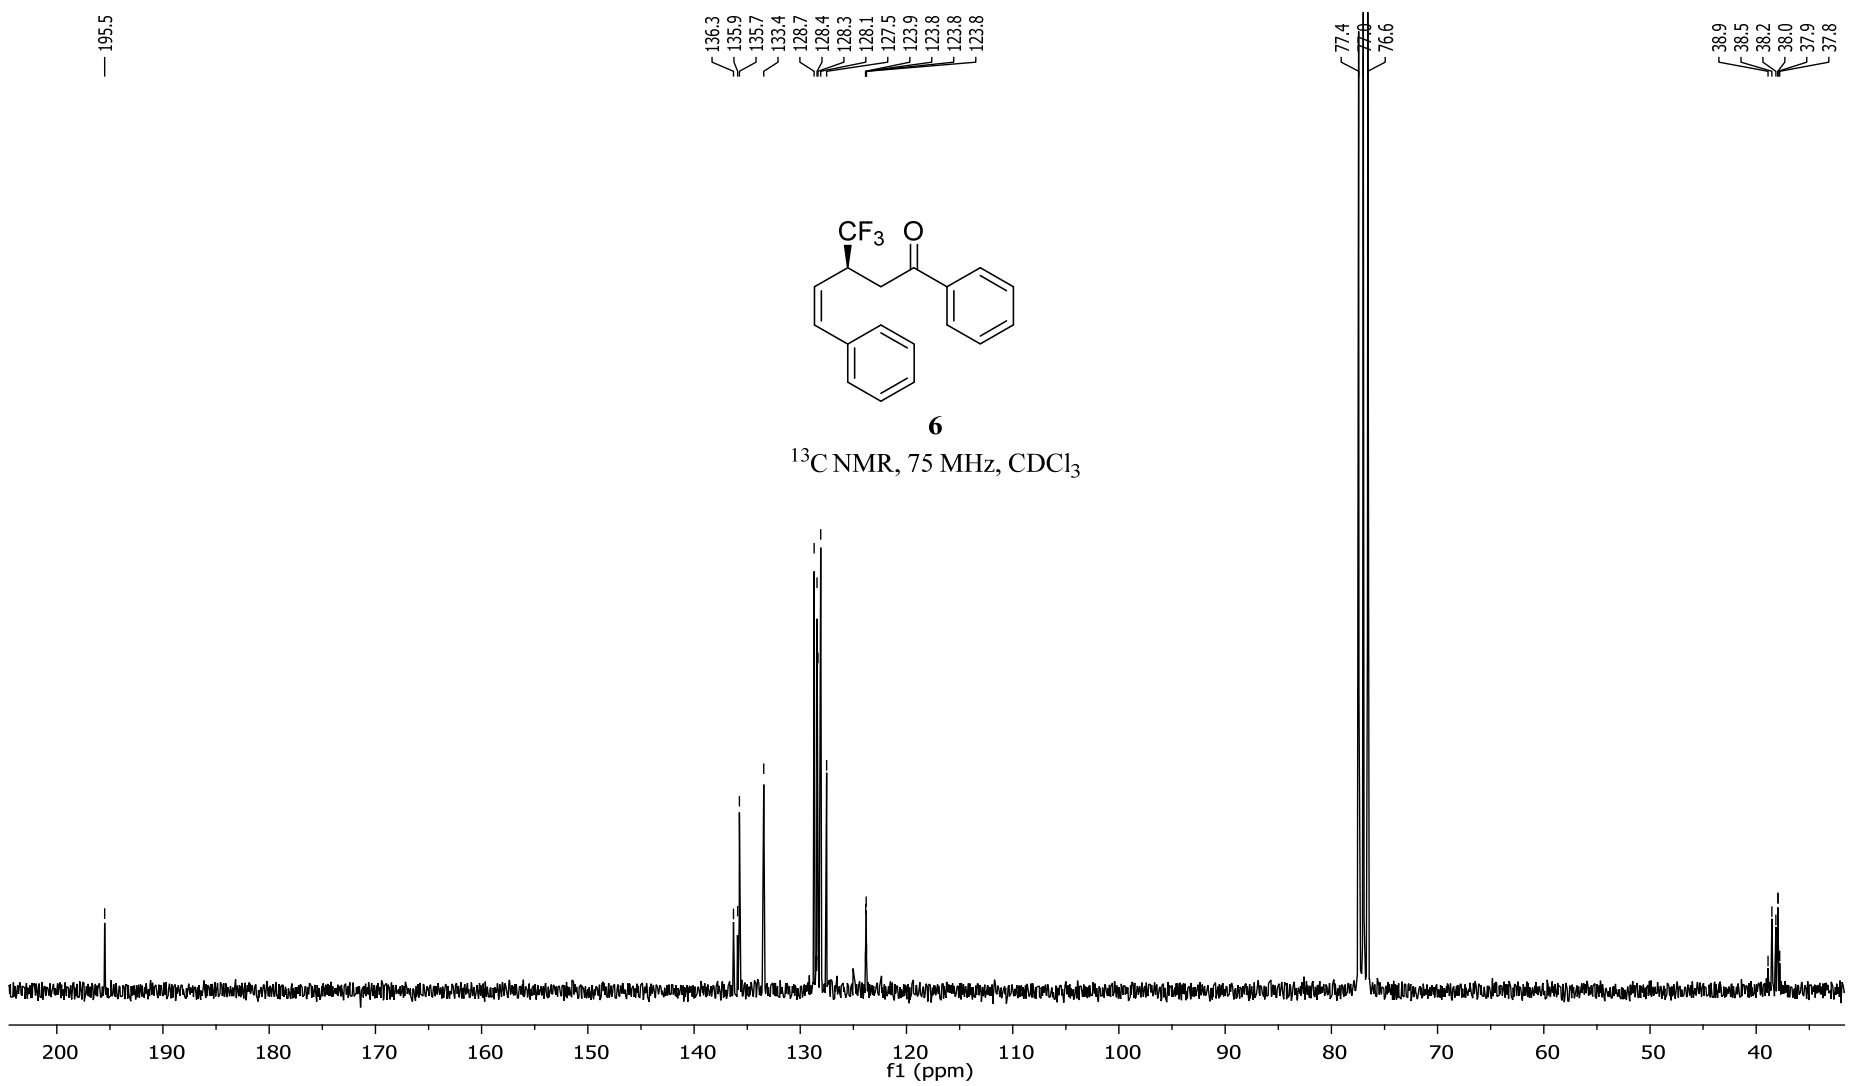

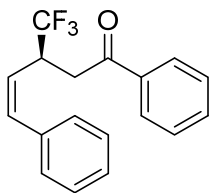

**6**

<sup>19</sup>F NMR, 282 MHz, CDCl<sub>3</sub>

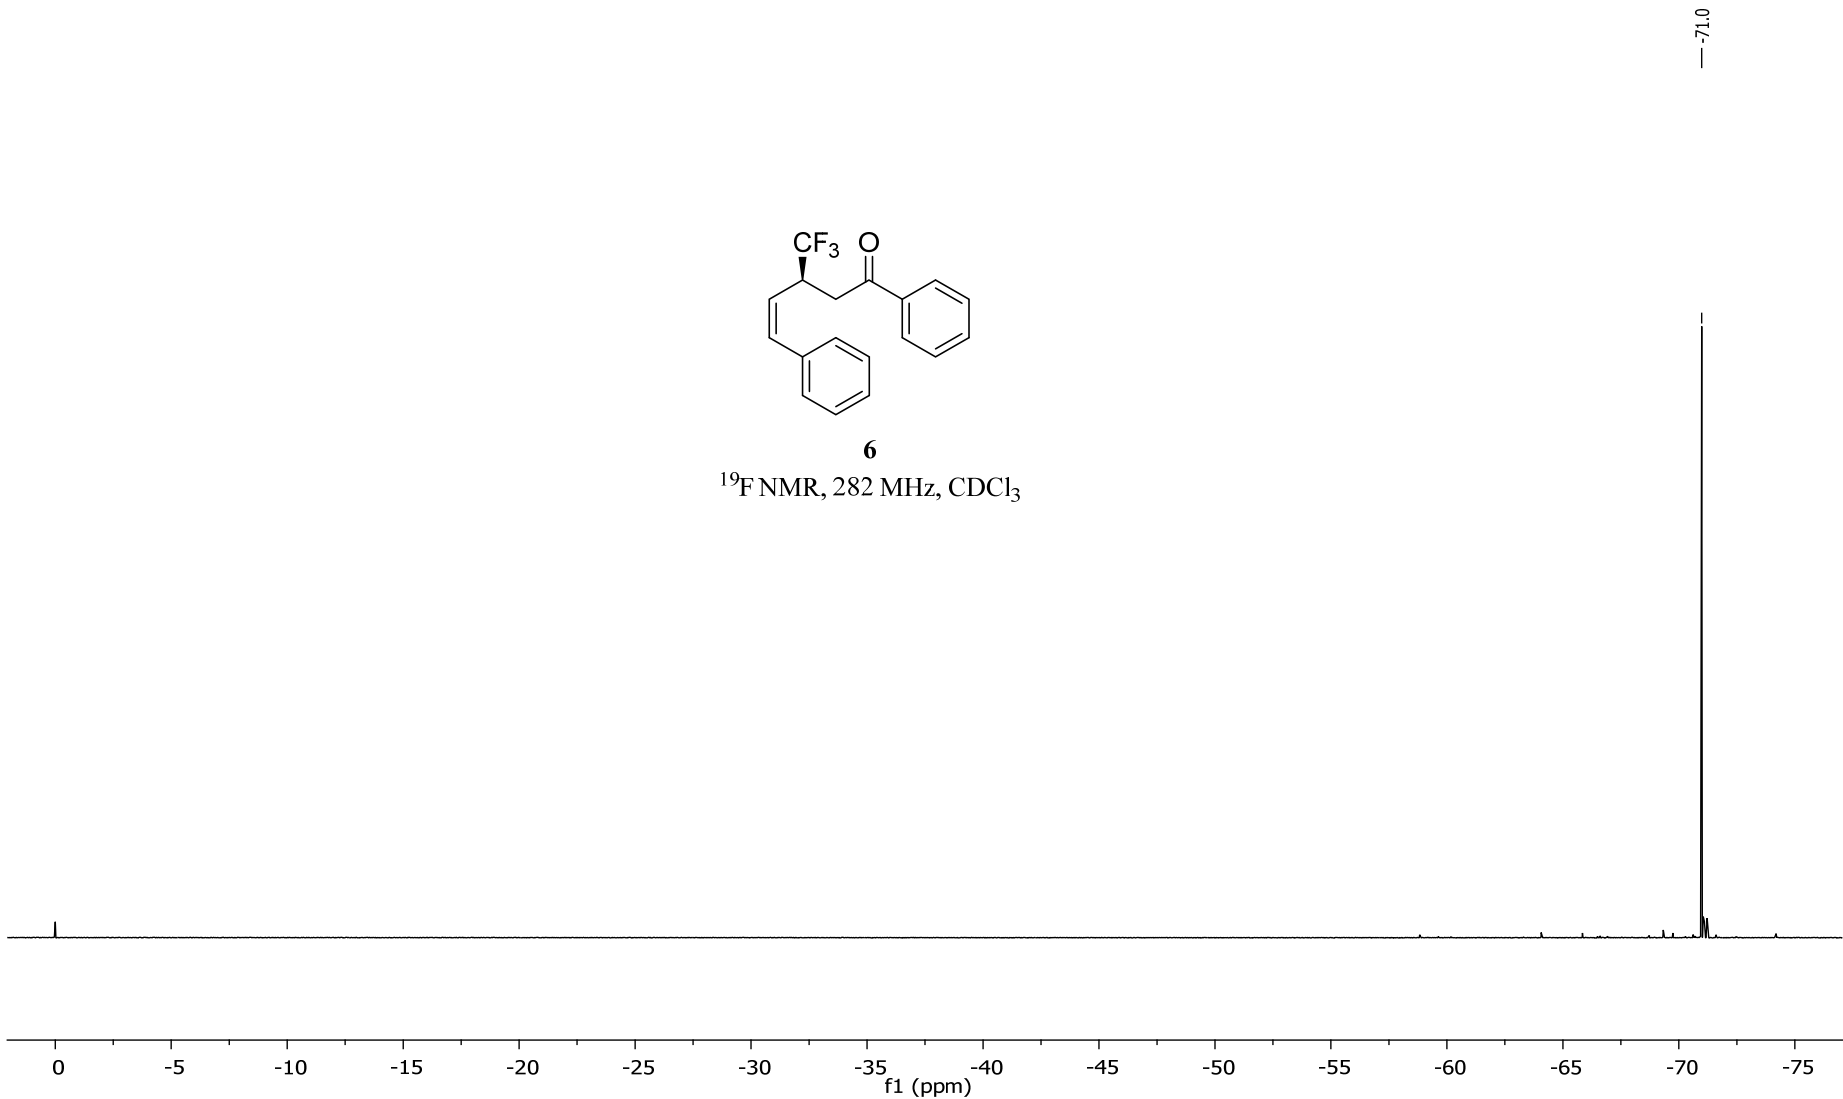

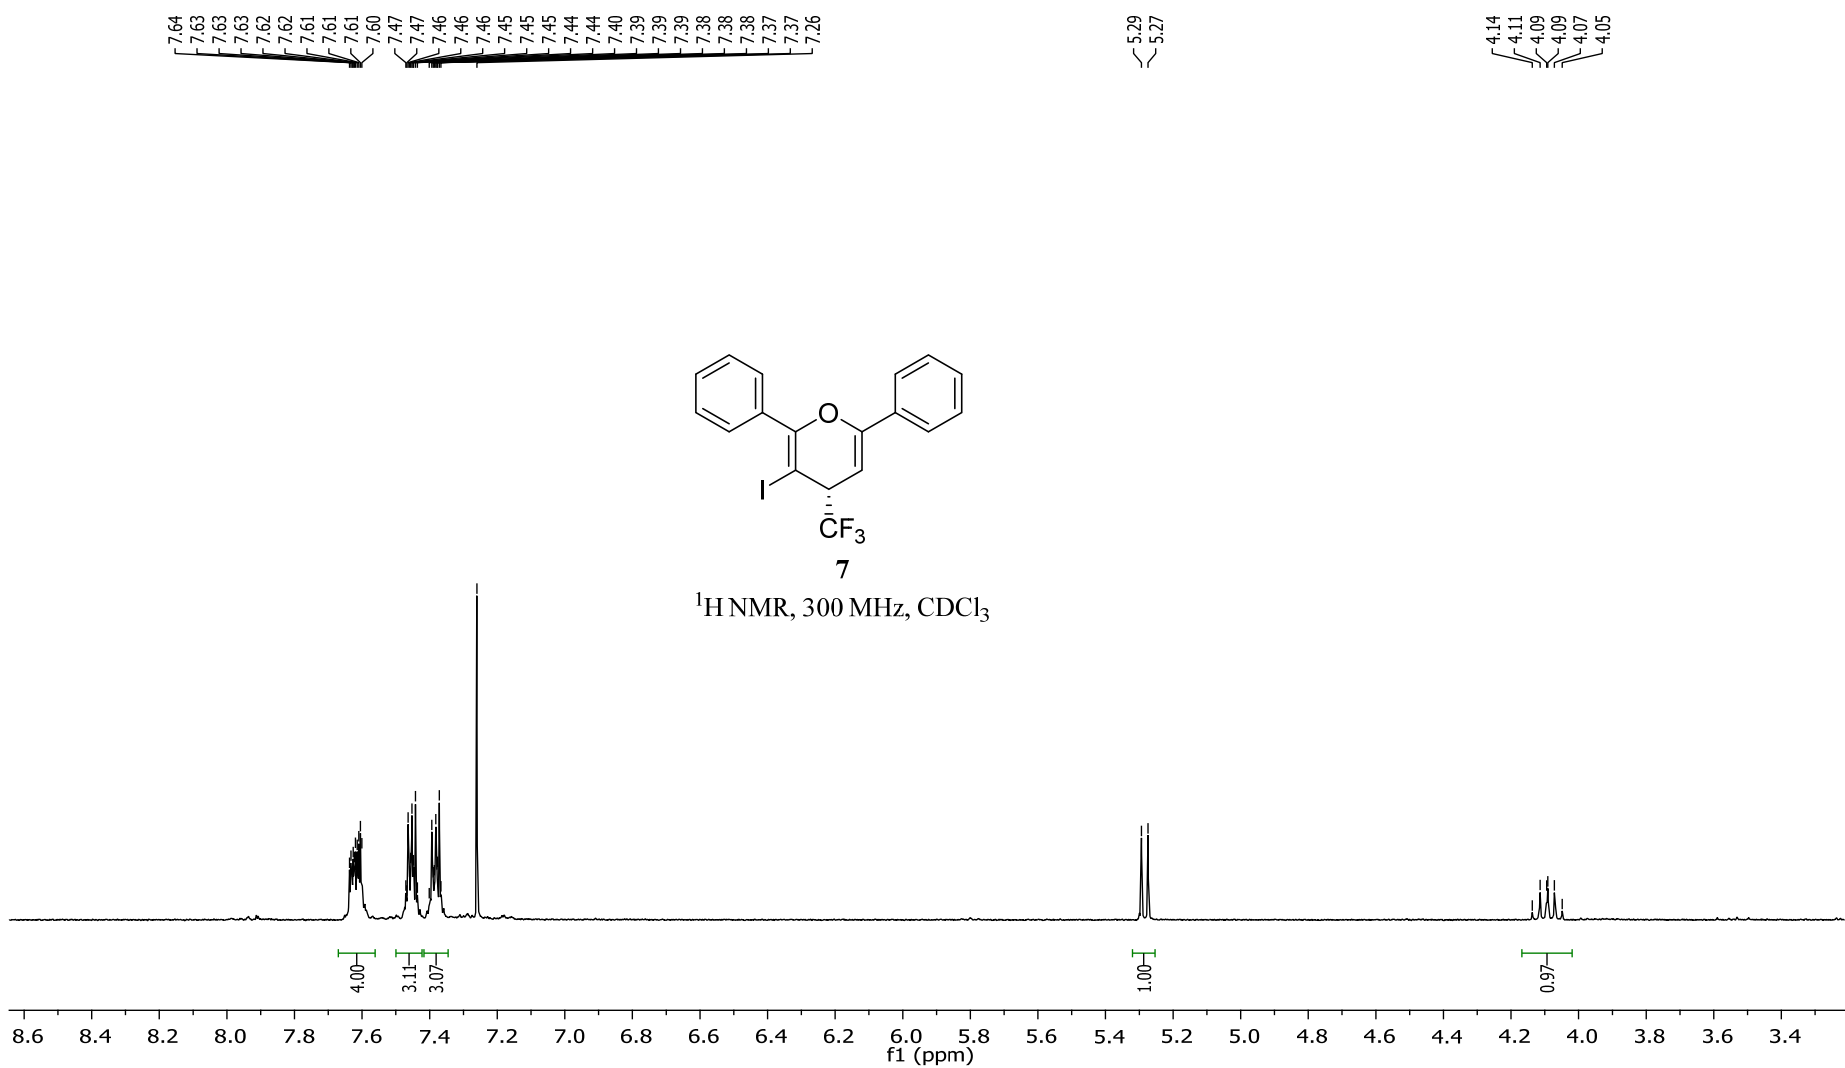

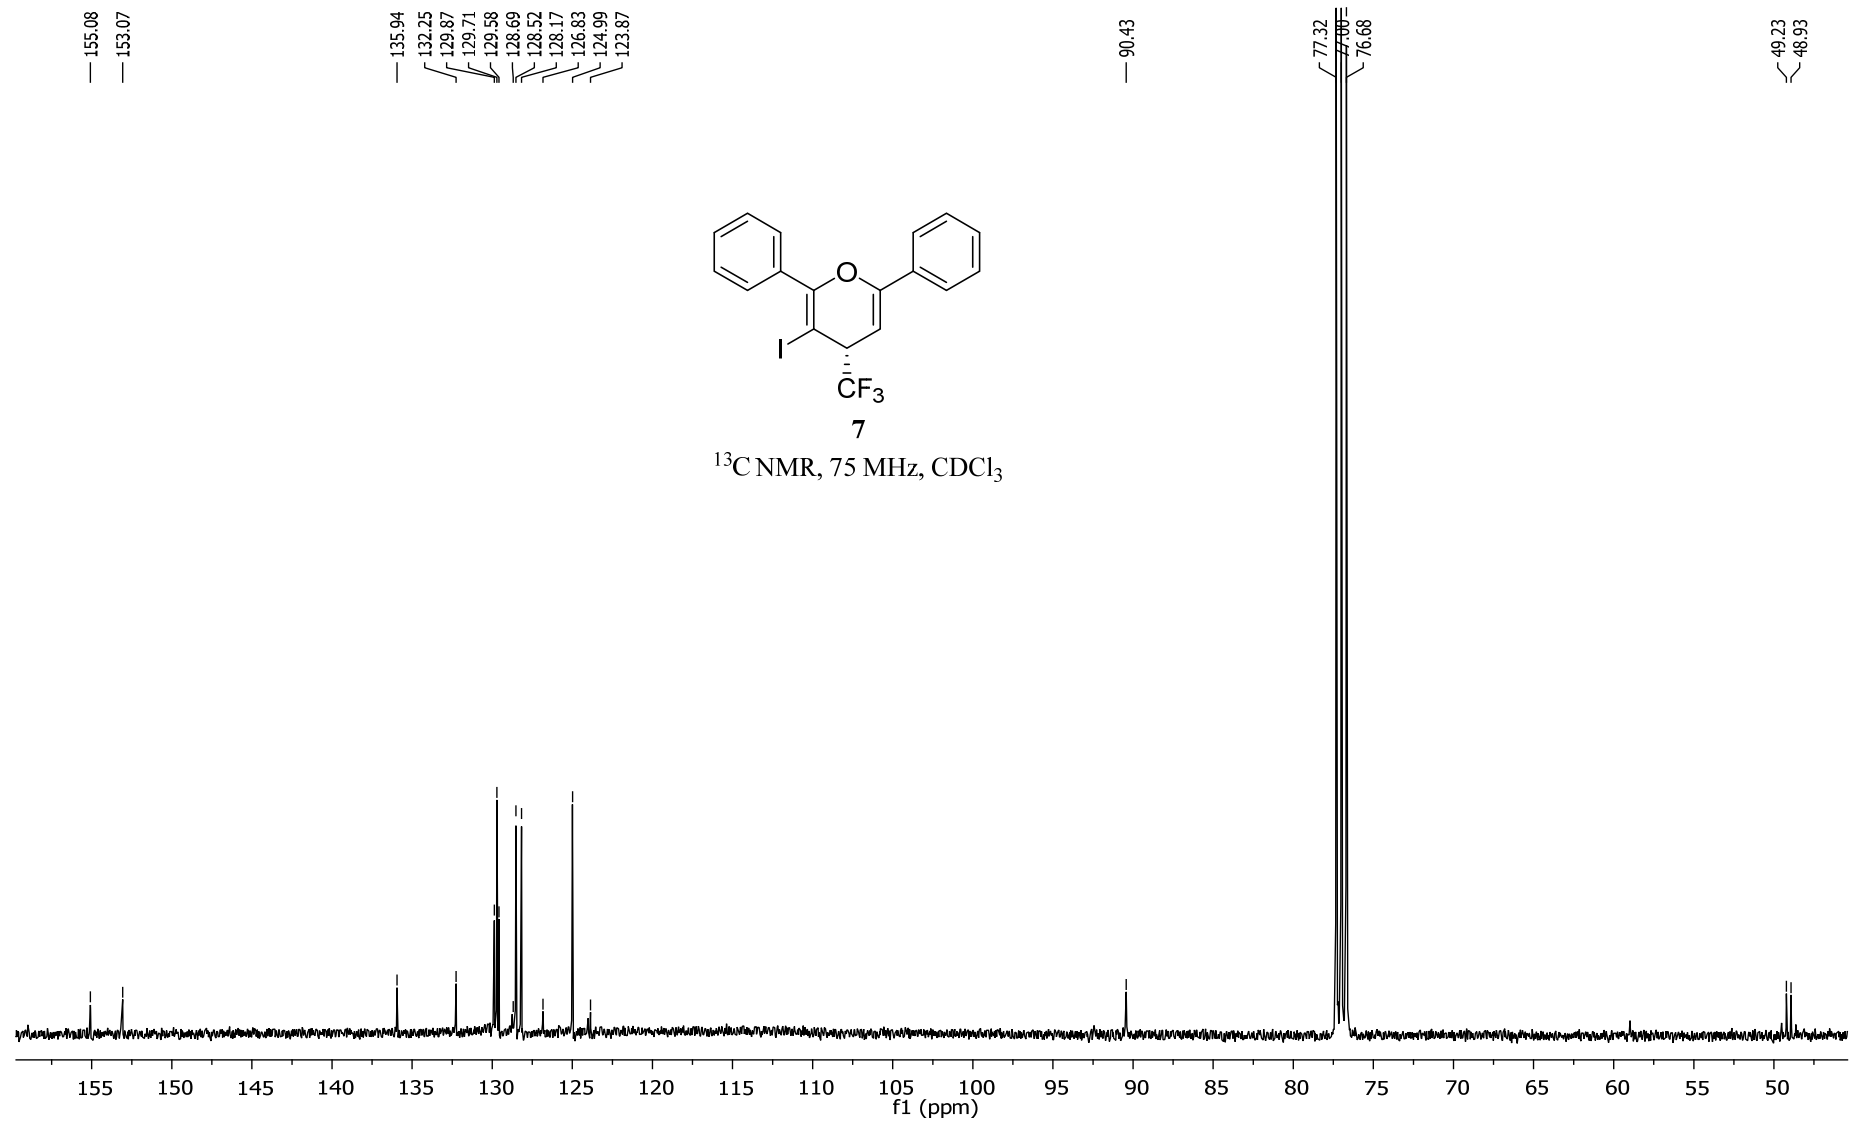

— -72.4

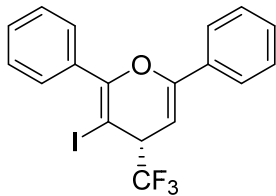

7

<sup>19</sup>F NMR, 282 MHz, CDCl<sub>3</sub>

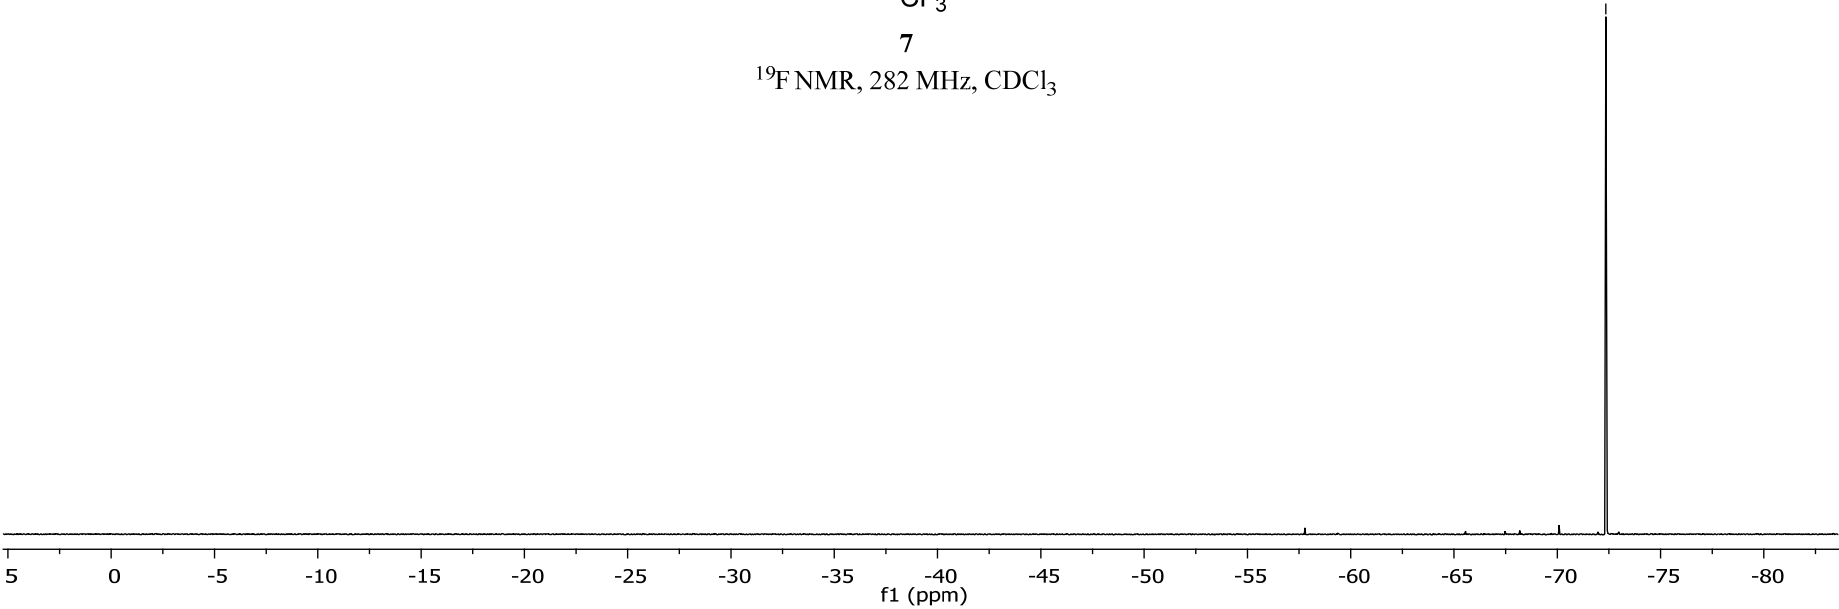

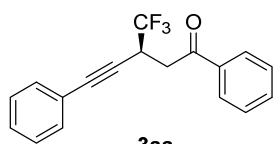

**3aa**

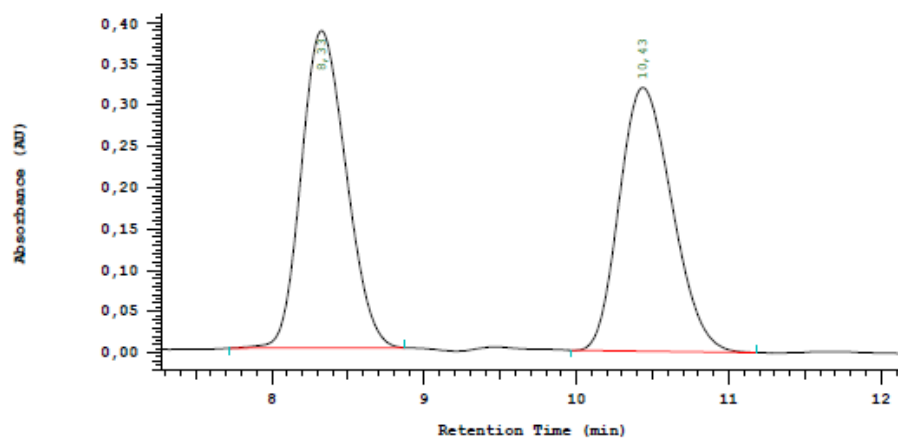

| No. | RT    | Area    | Area %  |
|-----|-------|---------|---------|
| 1   | 8,33  | 3924955 | 50,580  |
| 2   | 10,43 | 3835001 | 49,420  |
|     |       | 7759956 | 100,000 |

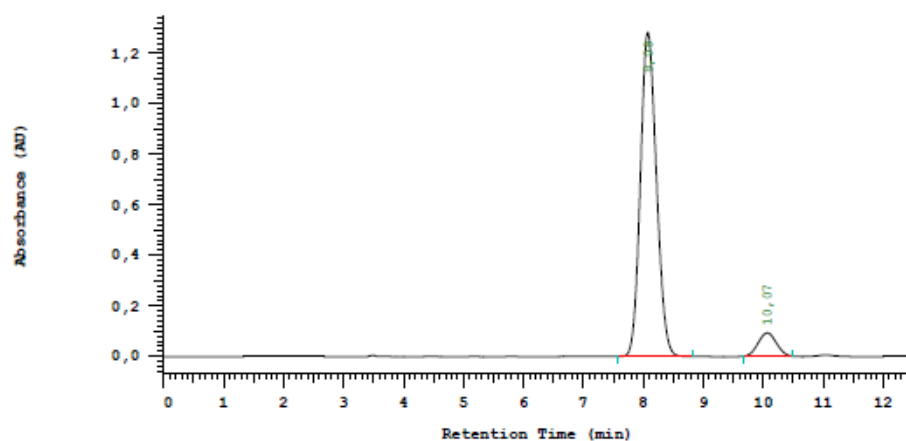

| No. | RT    | Area     | Area %  | Name |
|-----|-------|----------|---------|------|
| 1   | 8,08  | 11908140 | 92,490  |      |
| 2   | 10,07 | 966915   | 7,510   |      |
|     |       | 12875055 | 100,000 |      |

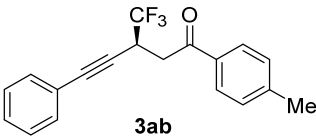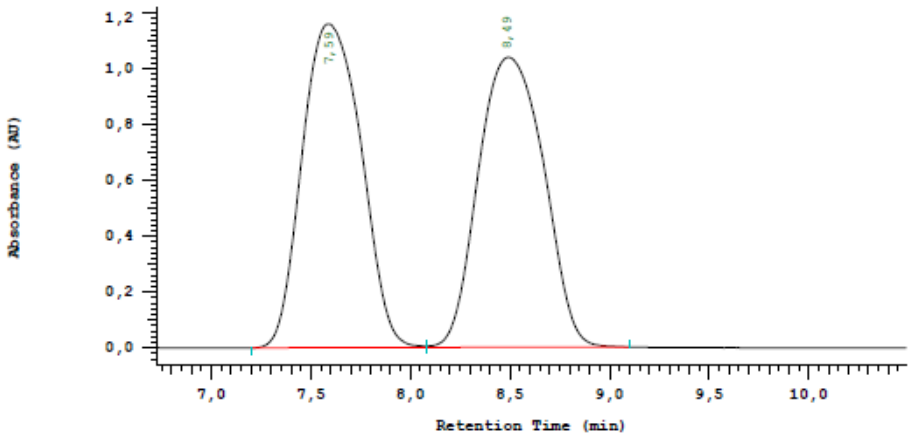

| No. | RT   | Area     | Area %  | Name |
|-----|------|----------|---------|------|
| 1   | 7,59 | 11951084 | 50,166  |      |
| 2   | 8,49 | 11872001 | 49,834  |      |
|     |      | 23823085 | 100,000 |      |

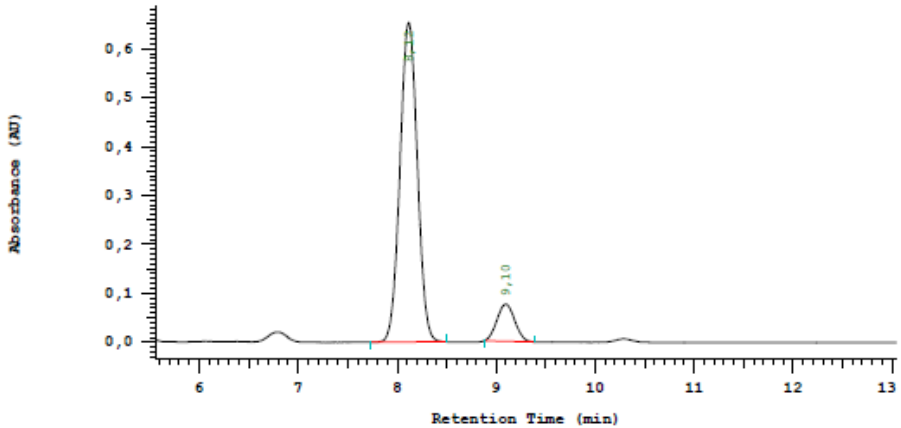

| No. | RT   | Area    | Area %  | Name |
|-----|------|---------|---------|------|
| 1   | 8,12 | 3979075 | 89,412  |      |
| 2   | 9,10 | 471170  | 10,588  |      |
|     |      | 4450245 | 100,000 |      |

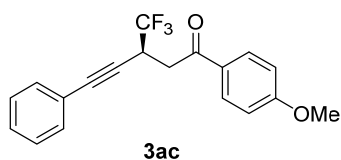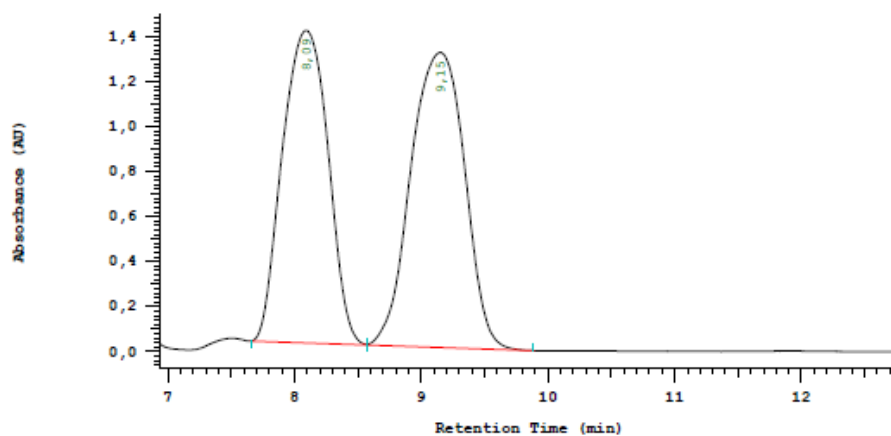

| No. | RT   | Area     | Area %  | Name |
|-----|------|----------|---------|------|
| 1   | 8,09 | 17412022 | 47,322  |      |
| 2   | 9,15 | 19383041 | 52,678  |      |
|     |      | 36795063 | 100,000 |      |

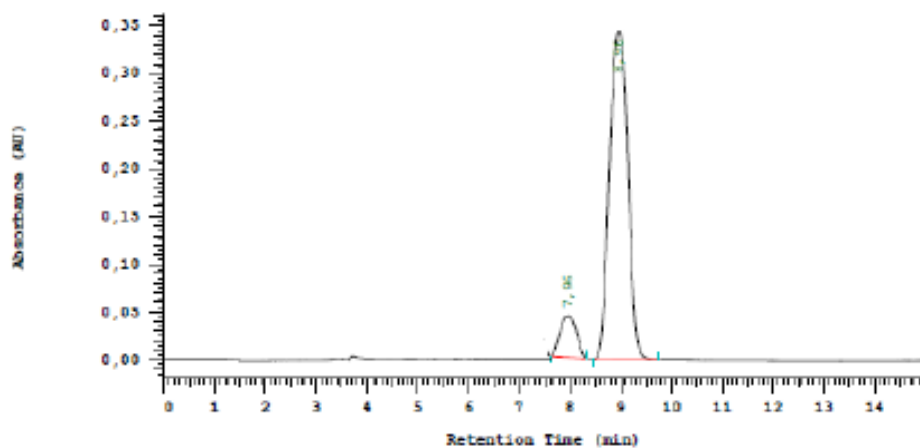

| No. | RT   | Area    | Area %  | Name |
|-----|------|---------|---------|------|
| 1   | 7,96 | 481630  | 10,043  |      |
| 2   | 8,96 | 4313950 | 89,957  |      |
|     |      | 4795580 | 100,000 |      |

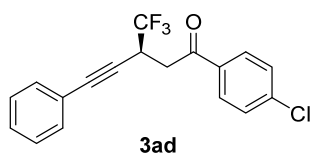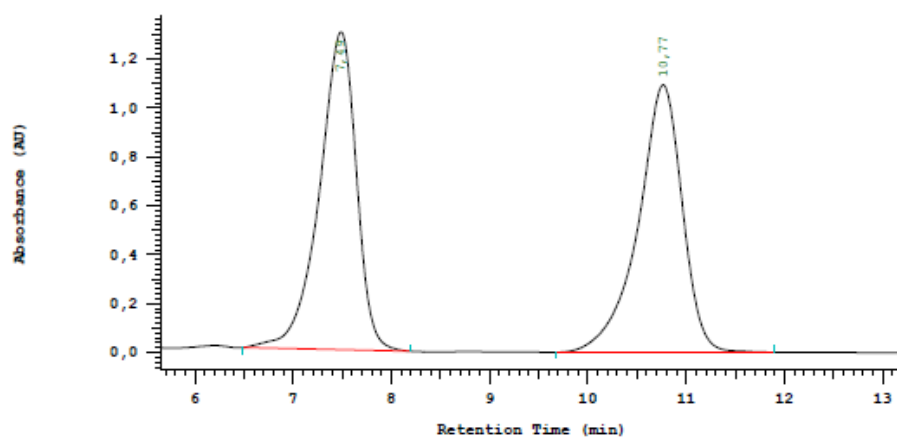

| No. | RT    | Area     | Area %  | Name |
|-----|-------|----------|---------|------|
| 1   | 7,49  | 17075254 | 49,999  |      |
| 2   | 10,77 | 17075995 | 50,001  |      |
|     |       | 34151249 | 100,000 |      |

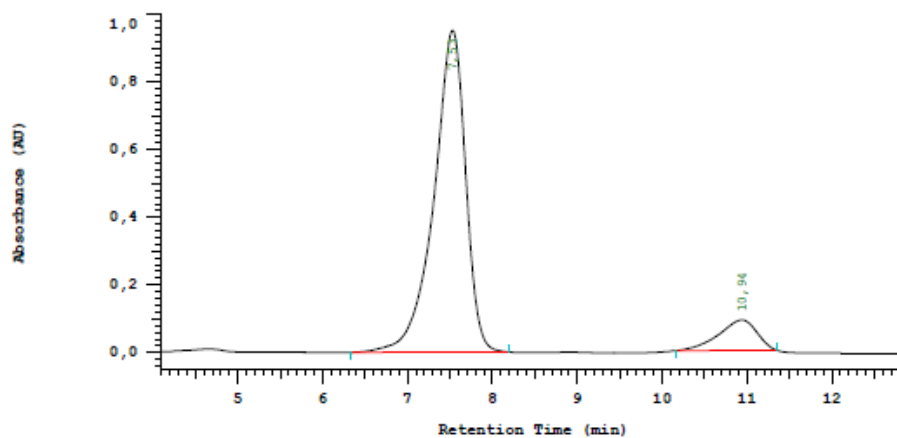

| No. | RT    | Area     | Area %  | Name |
|-----|-------|----------|---------|------|
| 1   | 7,53  | 12398415 | 89,802  |      |
| 2   | 10,94 | 1407990  | 10,198  |      |
|     |       | 13806405 | 100,000 |      |

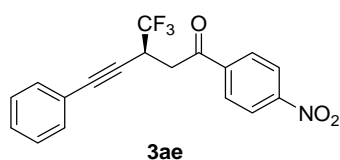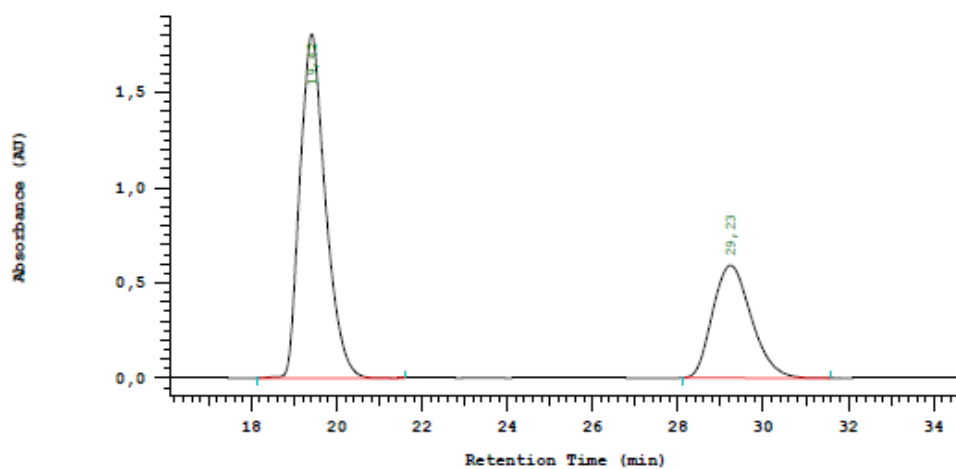

| No. | RT    | Area     | Area %  | Name |
|-----|-------|----------|---------|------|
| 1   | 19,42 | 37529094 | 66,843  |      |
| 2   | 29,23 | 18616300 | 33,157  |      |
|     |       | 56145394 | 100,000 |      |

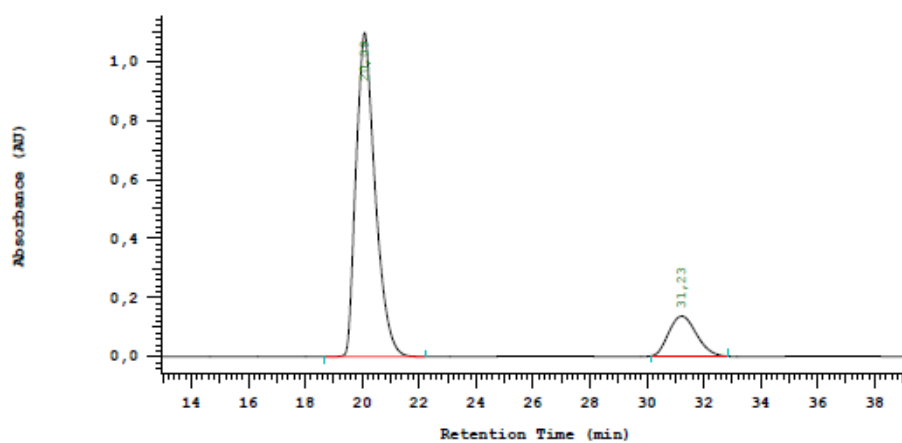

| No. | RT    | Area     | Area %  | Name |
|-----|-------|----------|---------|------|
| 1   | 20,09 | 25599854 | 84,871  |      |
| 2   | 31,23 | 4563240  | 15,129  |      |
|     |       | 30163094 | 100,000 |      |

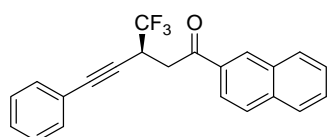

**3af**

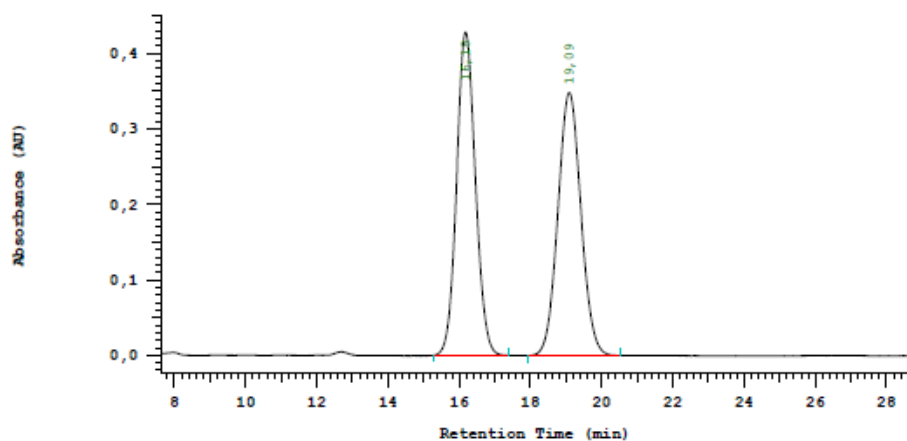

| No. | RT    | Area     | Area %  | Name |
|-----|-------|----------|---------|------|
| 1   | 16,18 | 7831230  | 50,018  |      |
| 2   | 19,09 | 7825729  | 49,982  |      |
|     |       | 15656959 | 100,000 |      |

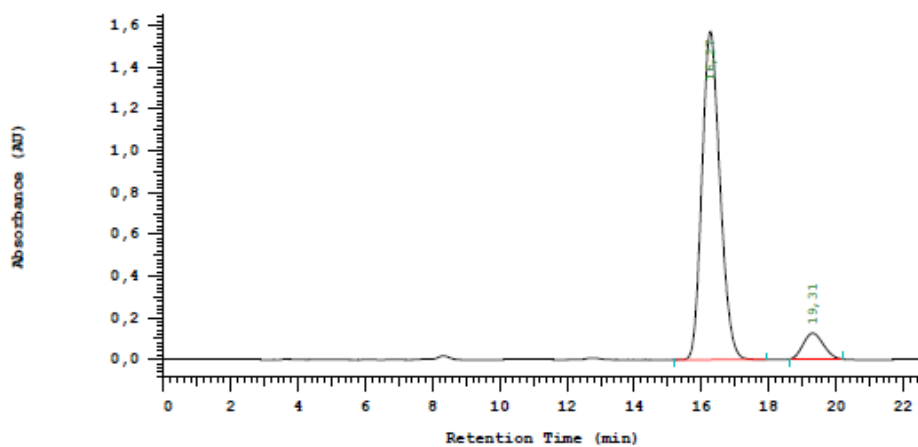

| No. | RT    | Area     | Area %  | Name |
|-----|-------|----------|---------|------|
| 1   | 16,27 | 29305795 | 91,966  |      |
| 2   | 19,31 | 2560000  | 8,034   |      |
|     |       | 31865795 | 100,000 |      |

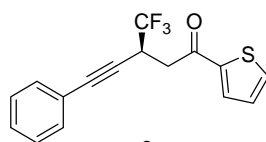

**3ag**

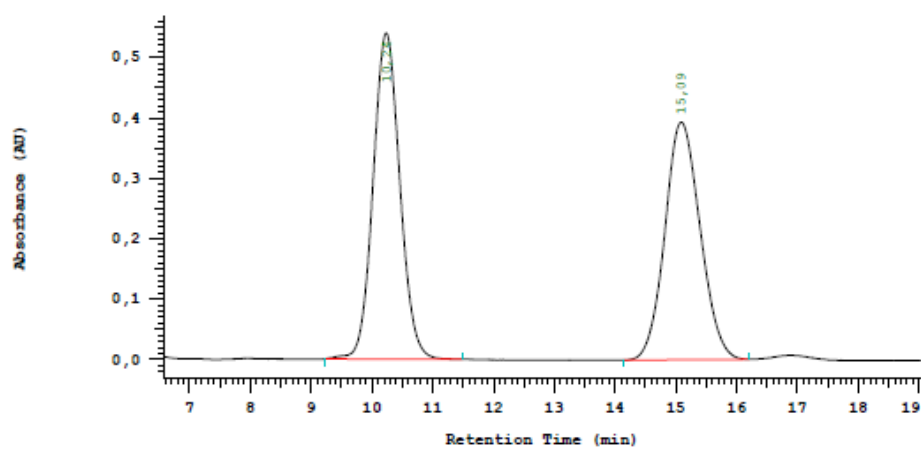

| No. | RT    | Area     | Area %  | Name |
|-----|-------|----------|---------|------|
| 1   | 10,24 | 8252040  | 51,023  |      |
| 2   | 15,09 | 7921200  | 48,977  |      |
|     |       | 16173240 | 100,000 |      |

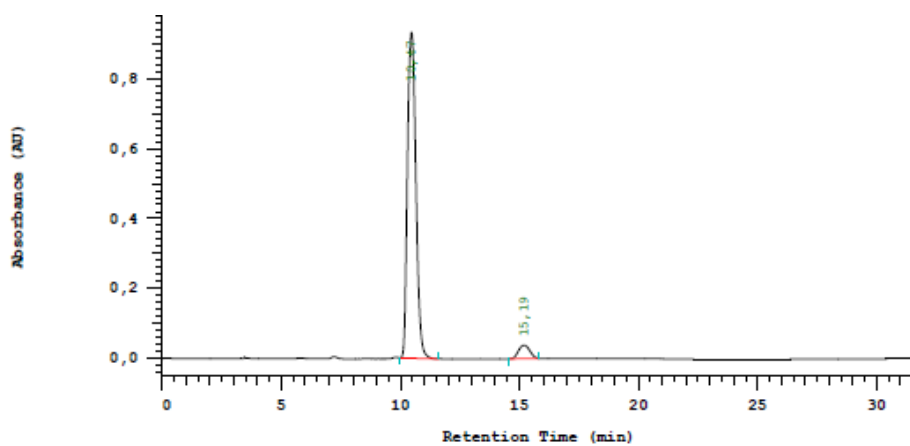

| No. | RT    | Area     | Area %  | Name |
|-----|-------|----------|---------|------|
| 1   | 10,47 | 11482160 | 94,873  |      |
| 2   | 15,19 | 620500   | 5,127   |      |
|     |       | 12102660 | 100,000 |      |

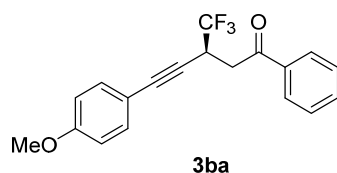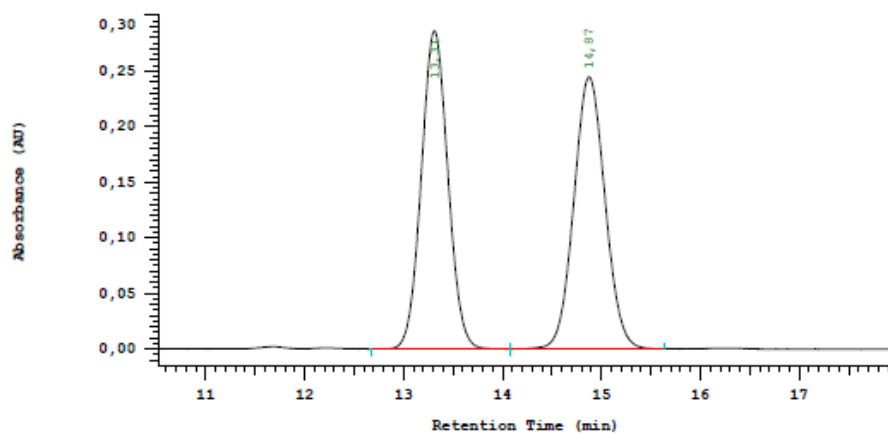

| No. | RT    | Area    | Area %  | Name |
|-----|-------|---------|---------|------|
| 1   | 13,31 | 2676360 | 49,920  |      |
| 2   | 14,87 | 2684990 | 50,080  |      |
|     |       | 5361350 | 100,000 |      |

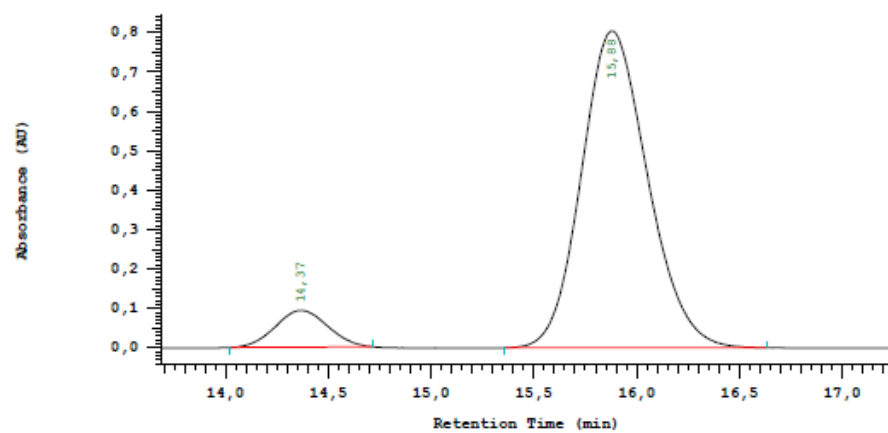

| No. | RT    | Area    | Area %  | Name |
|-----|-------|---------|---------|------|
| 1   | 14,37 | 828280  | 8,426   |      |
| 2   | 15,88 | 9001520 | 91,574  |      |
|     |       | 9829800 | 100,000 |      |

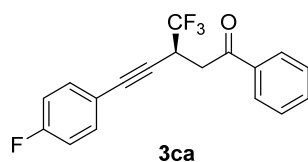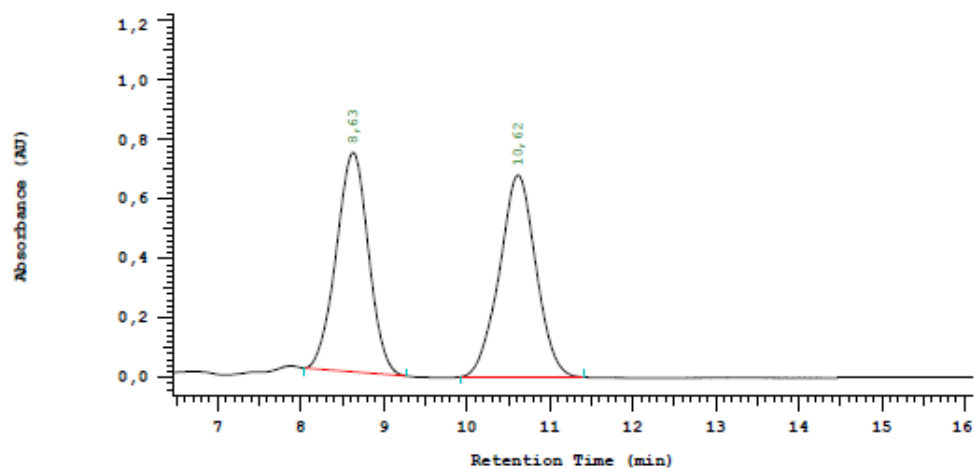

| No. | RT    | Area     | Area %  | Name |
|-----|-------|----------|---------|------|
| 1   | 8,63  | 9960184  | 48,927  |      |
| 2   | 10,62 | 10396870 | 51,073  |      |
|     |       | 20357054 | 100,000 |      |

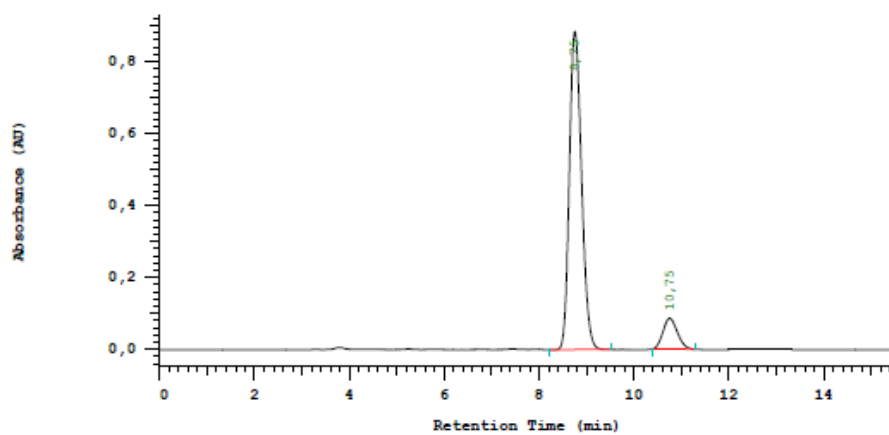

| No. | RT    | Area    | Area %  | Name |
|-----|-------|---------|---------|------|
| 1   | 8,75  | 7870600 | 89,774  |      |
| 2   | 10,75 | 896555  | 10,226  |      |
|     |       | 8767155 | 100,000 |      |

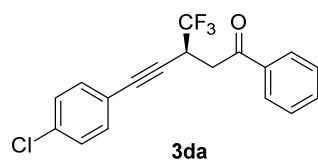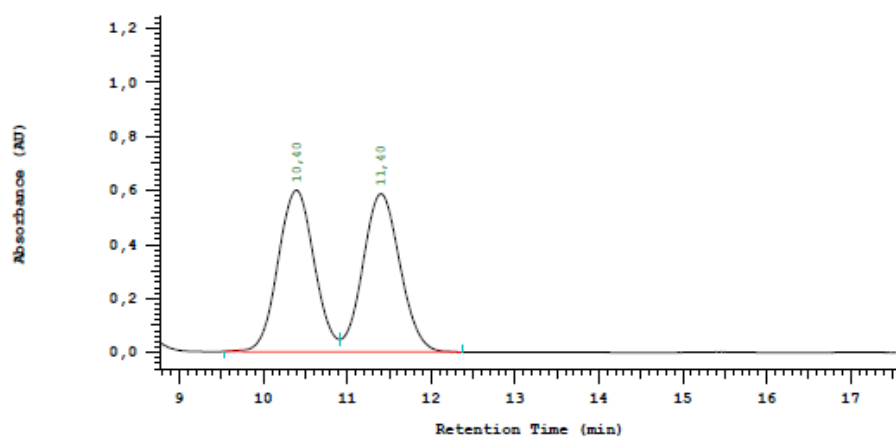

| No. | RT    | Area     | Area %  | Name |
|-----|-------|----------|---------|------|
| 1   | 10,40 | 8928930  | 49,846  |      |
| 2   | 11,40 | 8984144  | 50,154  |      |
|     |       | 17913074 | 100,000 |      |

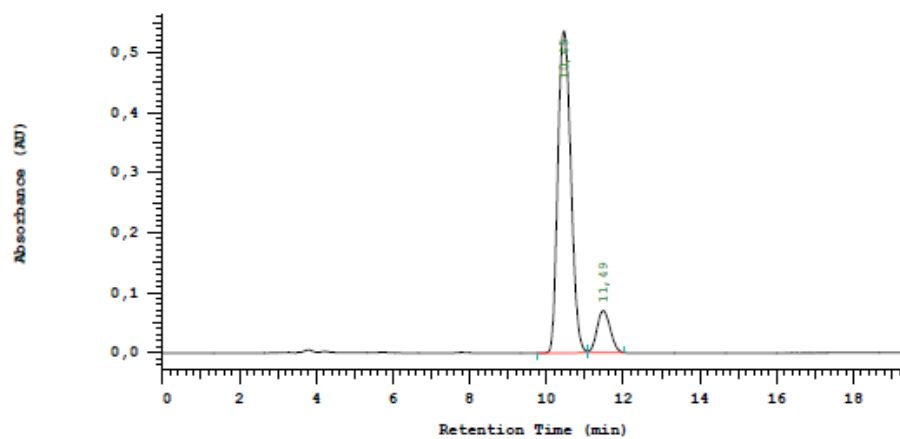

| No. | RT    | Area    | Area %  | Name |
|-----|-------|---------|---------|------|
| 1   | 10,45 | 6311811 | 88,204  |      |
| 2   | 11,49 | 844093  | 11,796  |      |
|     |       | 7155904 | 100,000 |      |

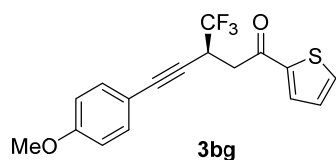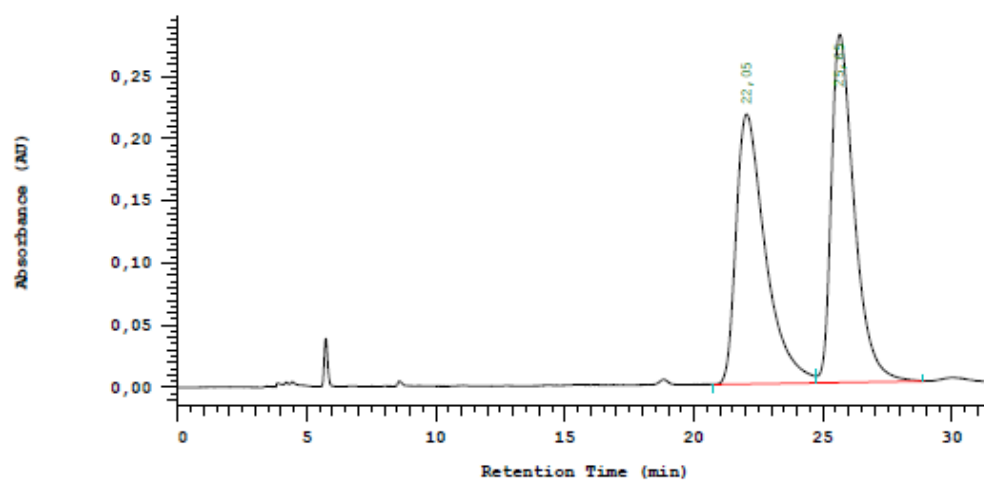

| No. | RT    | Area     | Area %  | Name |
|-----|-------|----------|---------|------|
| 1   | 22,05 | 8539349  | 49,710  |      |
| 2   | 25,65 | 8638890  | 50,290  |      |
|     |       | 17178239 | 100,000 |      |

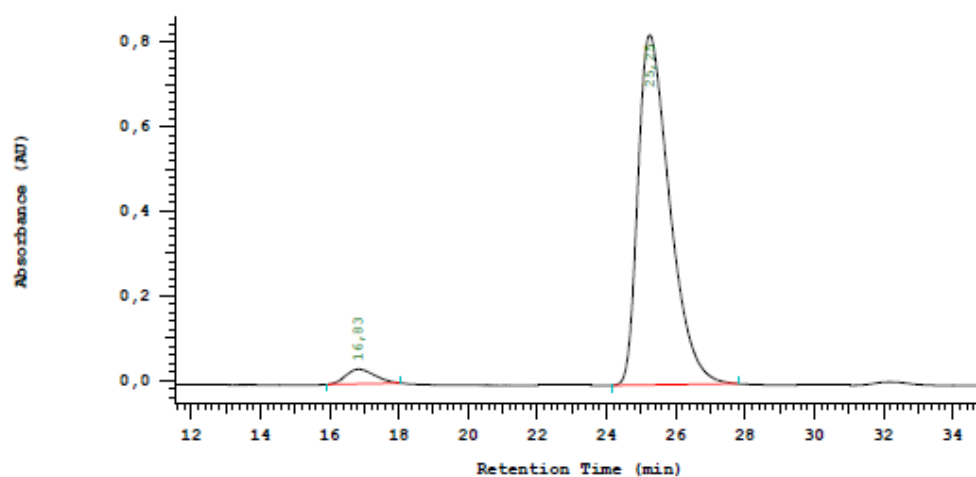

| No. | RT    | Area     | Area %  | Name |
|-----|-------|----------|---------|------|
| 1   | 16,83 | 1004280  | 3,679   |      |
| 2   | 25,25 | 26295569 | 96,321  |      |
|     |       | 27299849 | 100,000 |      |

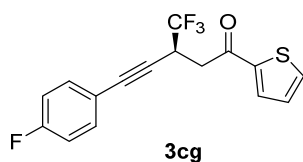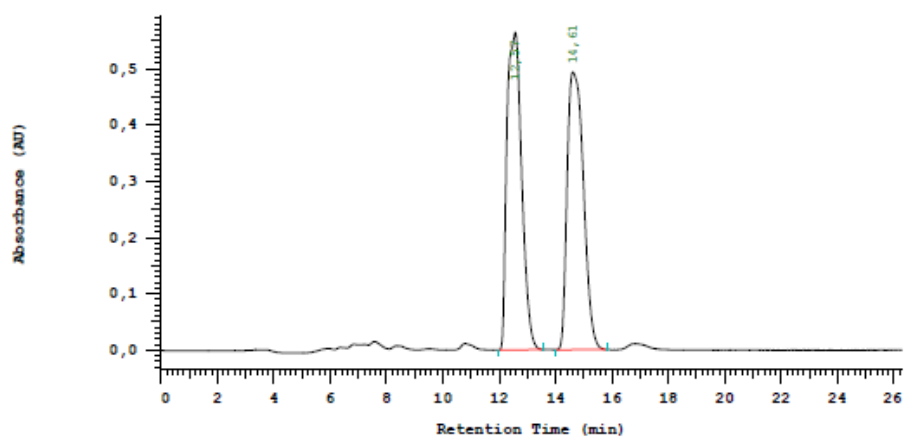

| No. | RT    | Area     | Area %  | Name |
|-----|-------|----------|---------|------|
| 1   | 12,57 | 10194740 | 50,636  |      |
| 2   | 14,61 | 9938569  | 49,364  |      |
|     |       | 20133309 | 100,000 |      |

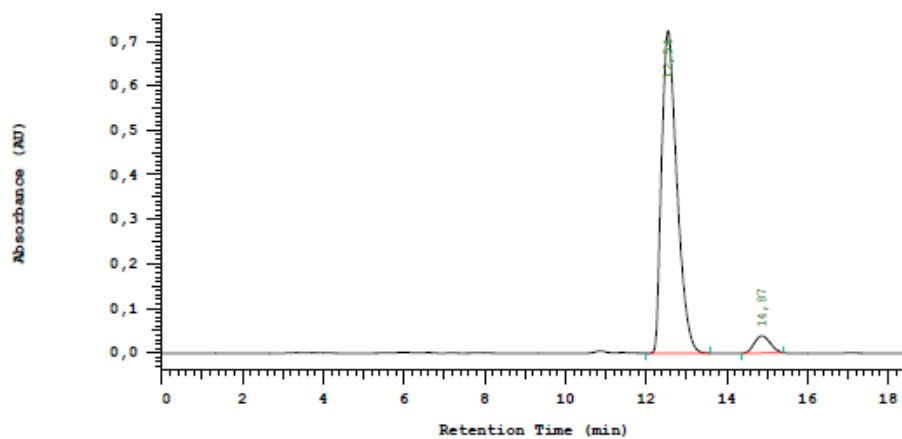

| No. | RT    | Area     | Area %  | Name |
|-----|-------|----------|---------|------|
| 1   | 12,54 | 9551030  | 94,769  |      |
| 2   | 14,87 | 527170   | 5,231   |      |
|     |       | 10078200 | 100,000 |      |

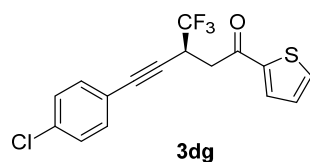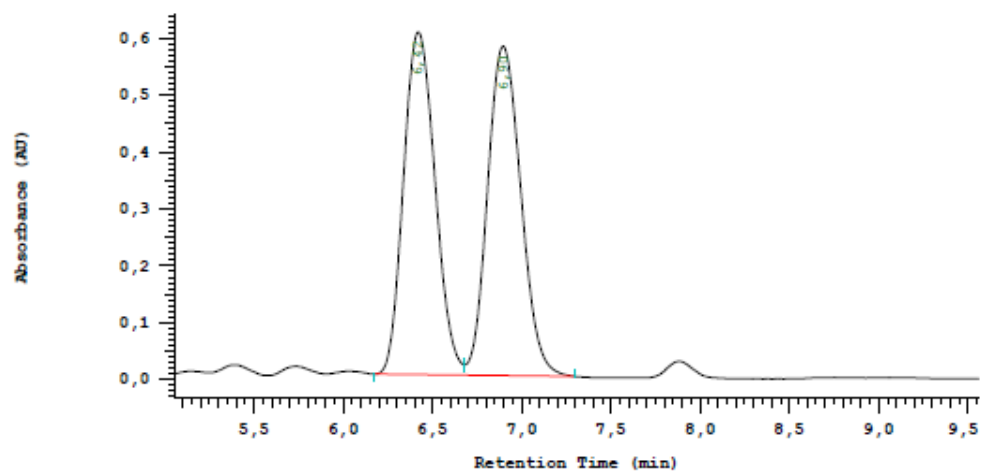

| No. | RT   | Area    | Area %  | Name |
|-----|------|---------|---------|------|
| 1   | 6,42 | 3692928 | 49,562  |      |
| 2   | 6,90 | 3758161 | 50,438  |      |
|     |      | 7451089 | 100,000 |      |

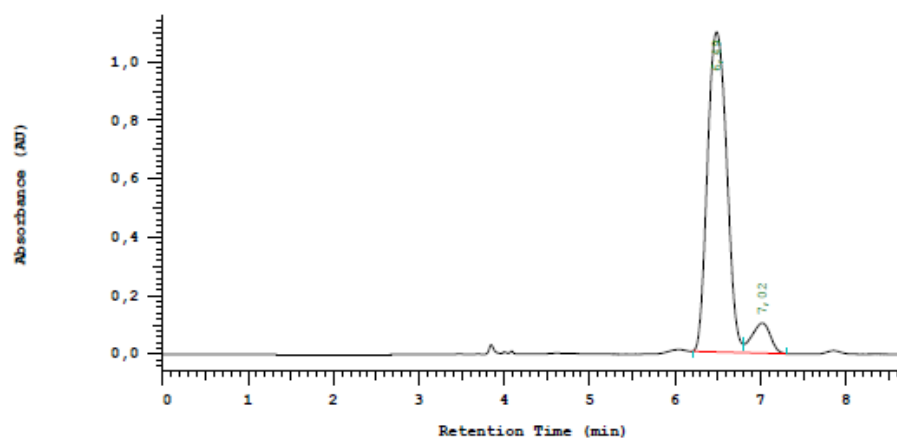

| No. | RT   | Area    | Area %  | Name |
|-----|------|---------|---------|------|
| 1   | 6,49 | 8573328 | 91,762  |      |
| 2   | 7,02 | 769626  | 8,238   |      |
|     |      | 9342954 | 100,000 |      |

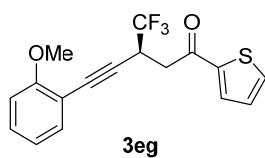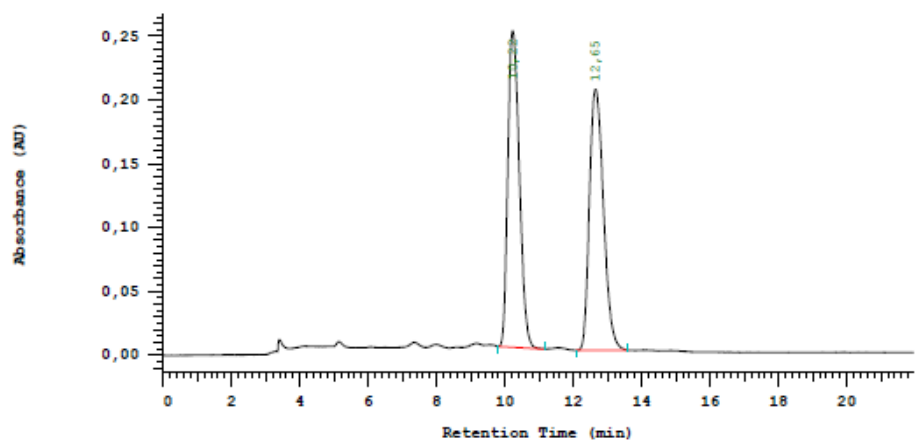

| No. | RT    | Area    | Area %  | Name |
|-----|-------|---------|---------|------|
| 1   | 10,22 | 2889530 | 49,821  |      |
| 2   | 12,65 | 2910330 | 50,179  |      |
|     |       | 5799860 | 100,000 |      |

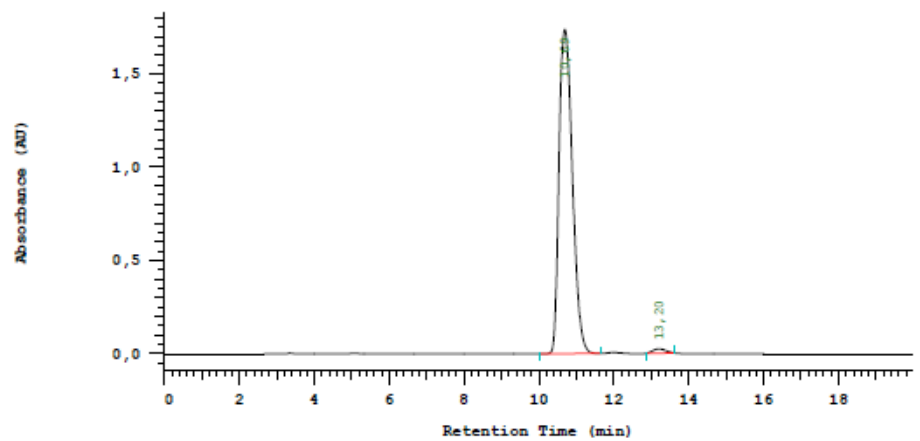

| No. | RT    | Area     | Area %  | Name |
|-----|-------|----------|---------|------|
| 1   | 10,69 | 21493235 | 98,728  |      |
| 2   | 13,20 | 276845   | 1,272   |      |
|     |       | 21770080 | 100,000 |      |

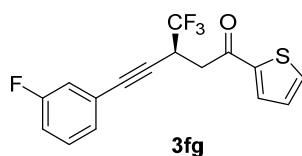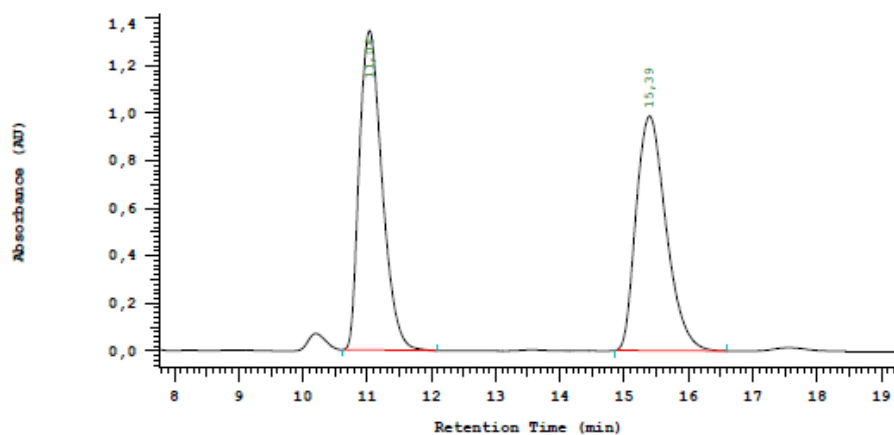

| No. | RT    | Area     | Area %  | Name |
|-----|-------|----------|---------|------|
| 1   | 11,04 | 16499859 | 50,751  |      |
| 2   | 15,39 | 16011619 | 49,249  |      |
|     |       | 32511478 | 100,000 |      |

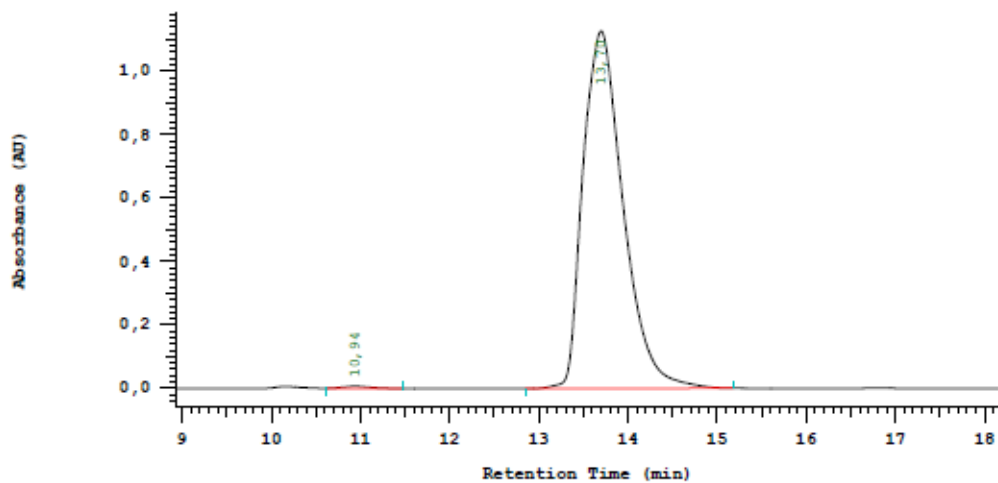

| No. | RT    | Area     | Area %  | Name |
|-----|-------|----------|---------|------|
| 1   | 10,94 | 75945    | 0,429   |      |
| 2   | 13,70 | 17638089 | 99,571  |      |
|     |       | 17714034 | 100,000 |      |

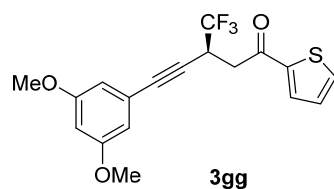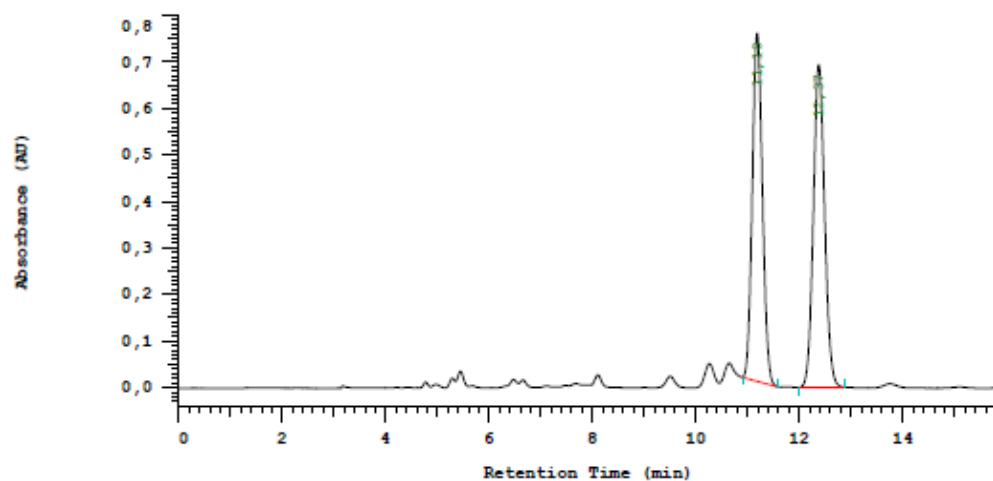

| No. | RT    | Area     | Area %  | Name |
|-----|-------|----------|---------|------|
| 1   | 11,18 | 5055040  | 48,820  |      |
| 2   | 12,37 | 5299460  | 51,180  |      |
|     |       | 10354500 | 100,000 |      |

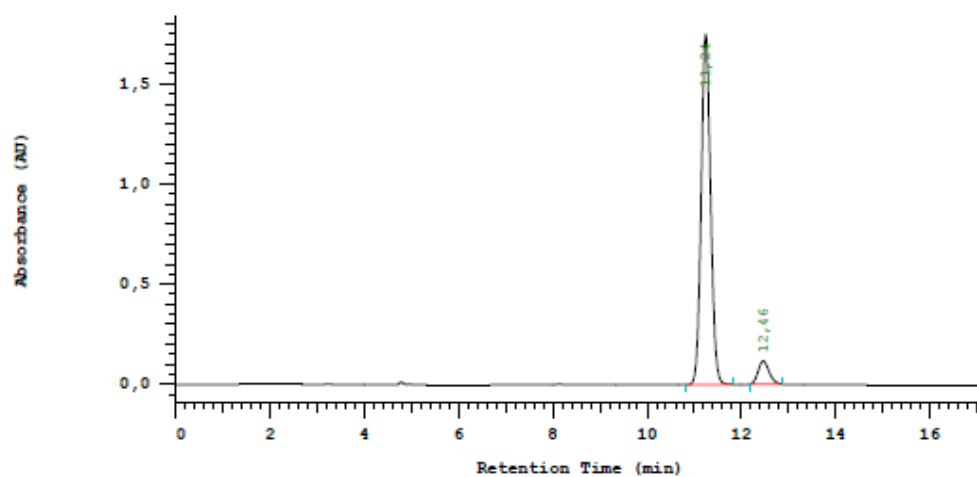

| No. | RT    | Area     | Area %  | Name |
|-----|-------|----------|---------|------|
| 1   | 11,24 | 12062089 | 92,800  |      |
| 2   | 12,46 | 935910   | 7,200   |      |
|     |       | 12997999 | 100,000 |      |

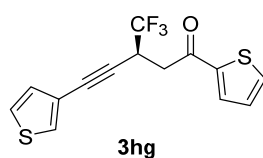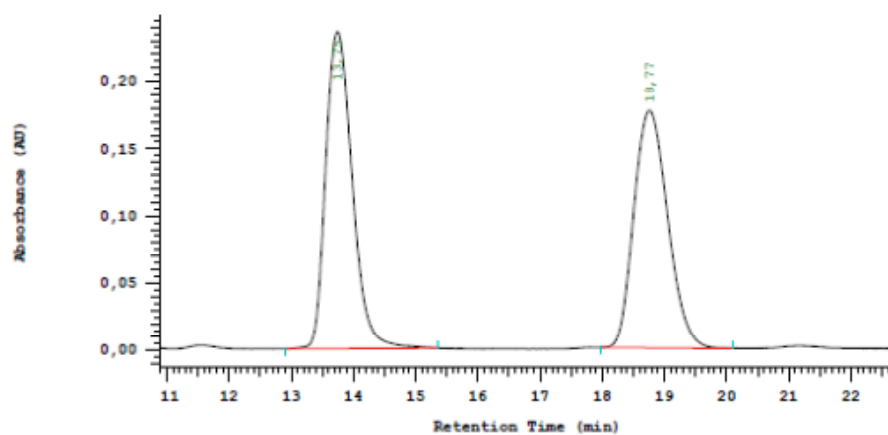

| No. | RT    | Area    | Area %  | Name |
|-----|-------|---------|---------|------|
| 1   | 13,75 | 3495870 | 51,248  |      |
| 2   | 18,77 | 3325550 | 48,752  |      |
|     |       | 6821420 | 100,000 |      |

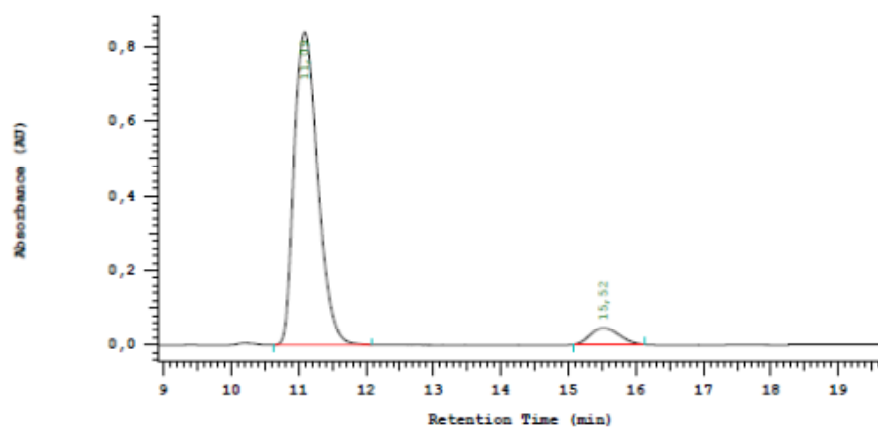

| No. | RT    | Area     | Area %  | Name |
|-----|-------|----------|---------|------|
| 1   | 11,09 | 10169350 | 93,933  |      |
| 2   | 15,52 | 656800   | 6,067   |      |
|     |       | 10826150 | 100,000 |      |

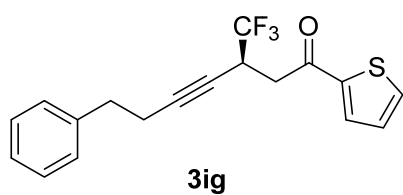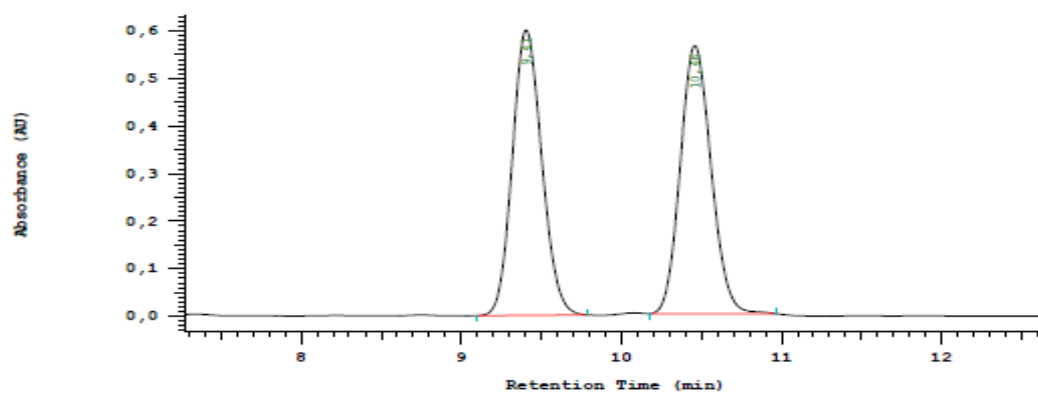

| No. | RT    | Area    | Area %  |
|-----|-------|---------|---------|
| 1   | 9,41  | 3829870 | 50,388  |
| 2   | 10,46 | 3770840 | 49,612  |
|     |       | 7600710 | 100,000 |

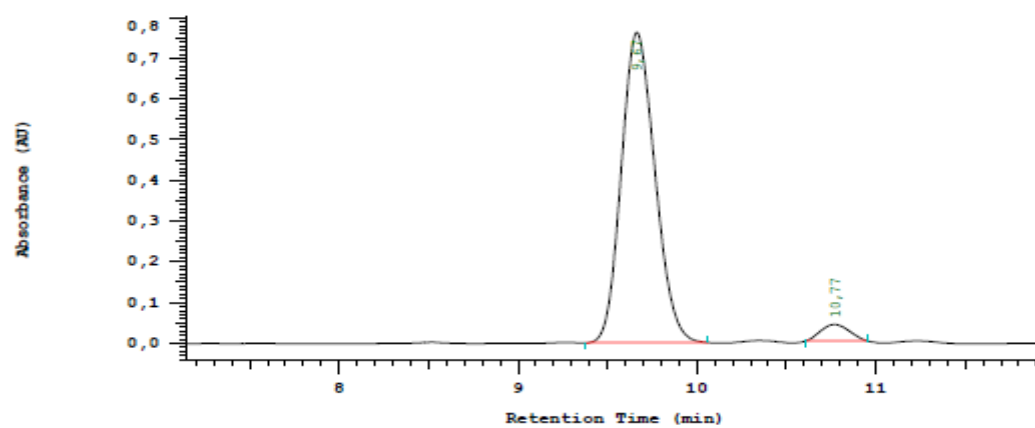

| No. | RT    | Area    | Area %  |
|-----|-------|---------|---------|
| 1   | 9,67  | 4974620 | 95,792  |
| 2   | 10,77 | 218520  | 4,208   |
|     |       | 5193140 | 100,000 |

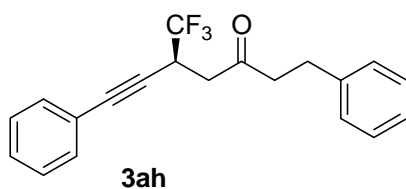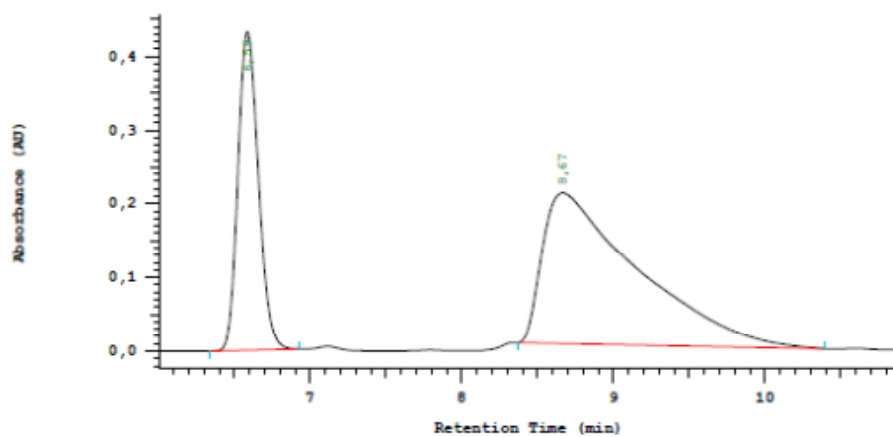

| No. | RT   | Area    | Area %  | Name |
|-----|------|---------|---------|------|
| 1   | 6,59 | 2026100 | 31,286  |      |
| 2   | 8,67 | 4449964 | 68,714  |      |
|     |      | 6476064 | 100,000 |      |

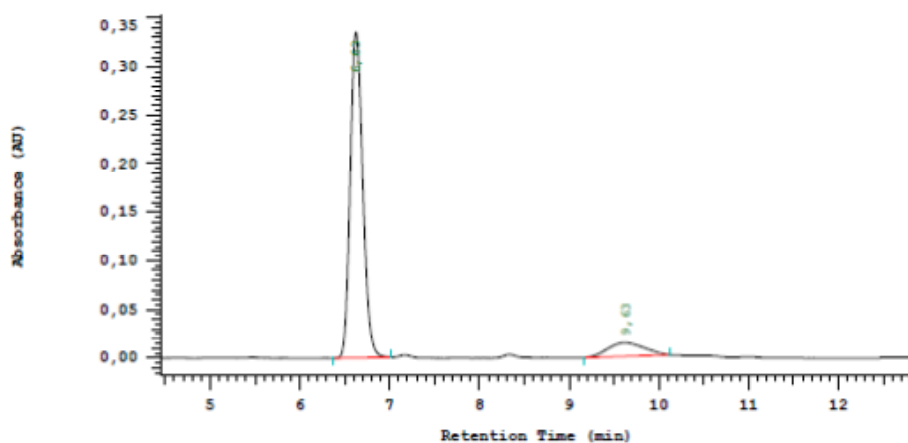

| No. | RT   | Area    | Area %  | Name |
|-----|------|---------|---------|------|
| 1   | 6,63 | 1625410 | 89,295  |      |
| 2   | 9,63 | 194860  | 10,705  |      |
|     |      | 1820270 | 100,000 |      |

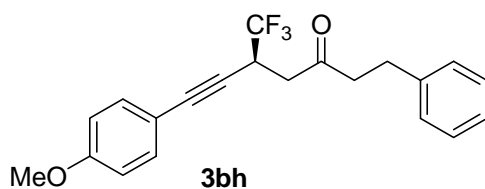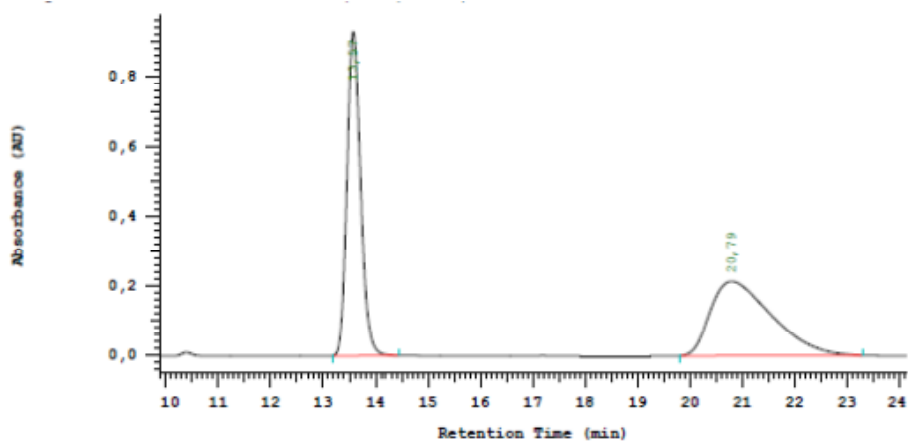

| No. | RT    | Area     | Area %  | Name |
|-----|-------|----------|---------|------|
| 1   | 13,57 | 8411390  | 49,176  |      |
| 2   | 20,79 | 8693320  | 50,824  |      |
|     |       | 17104710 | 100,000 |      |

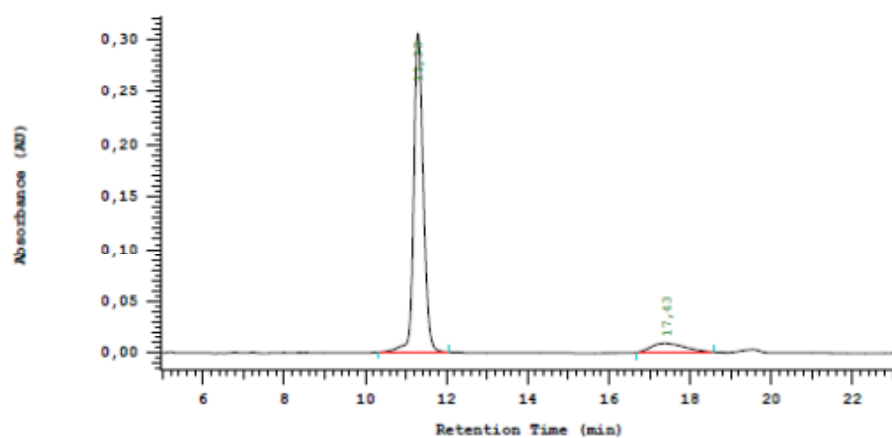

| No. | RT    | Area    | Area %  | Name |
|-----|-------|---------|---------|------|
| 1   | 11,30 | 2495555 | 90,986  |      |
| 2   | 17,43 | 247250  | 9,014   |      |
|     |       | 2742805 | 100,000 |      |

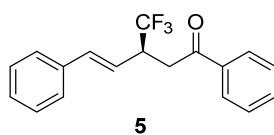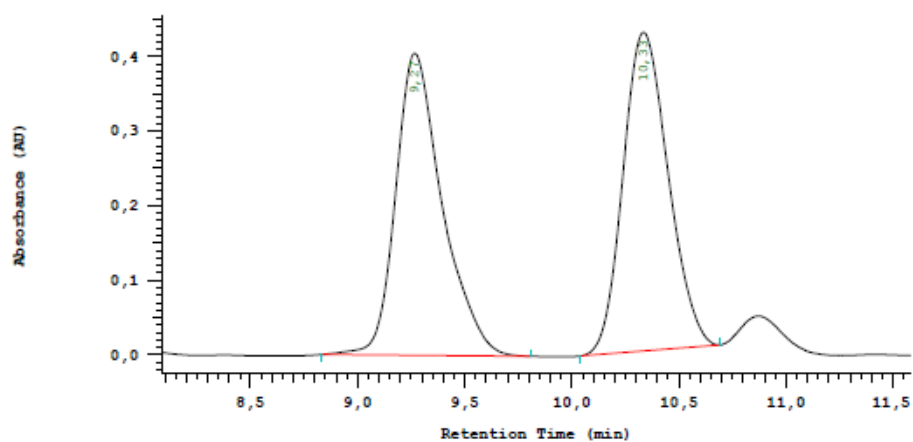

| No. | RT    | Area    | Area %  | Name |
|-----|-------|---------|---------|------|
| 1   | 9,27  | 3064390 | 49,523  |      |
| 2   | 10,33 | 3123390 | 50,477  |      |
|     |       | 6187780 | 100,000 |      |

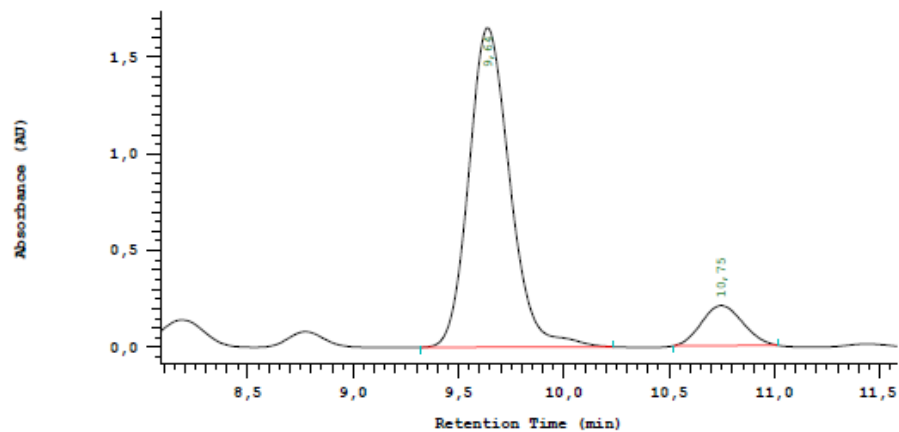

| No. | RT    | Area     | Area %  | Name |
|-----|-------|----------|---------|------|
| 1   | 9,64  | 11183110 | 88,822  |      |
| 2   | 10,75 | 1407330  | 11,178  |      |
|     |       | 12590440 | 100,000 |      |

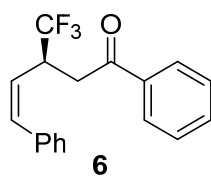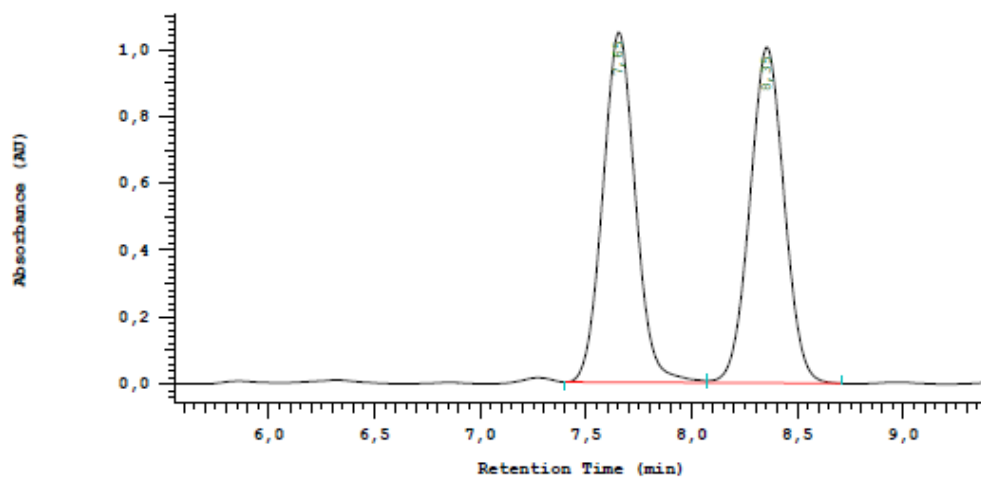

| No. | RT   | Area     | Area %  | Name |
|-----|------|----------|---------|------|
| 1   | 7,65 | 5623247  | 49,805  |      |
| 2   | 8,35 | 5667342  | 50,195  |      |
|     |      | 11290589 | 100,000 |      |

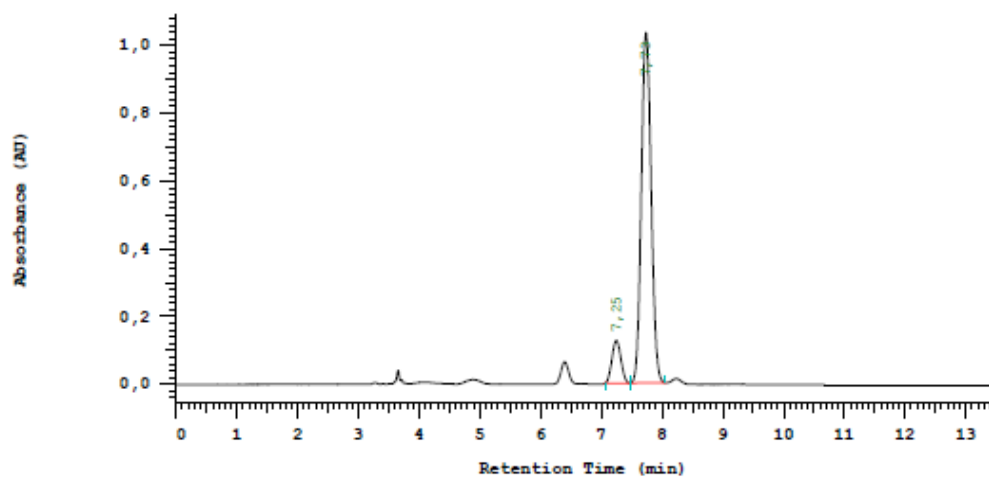

| No. | RT   | Area    | Area %  | Name |
|-----|------|---------|---------|------|
| 1   | 7,25 | 648834  | 10,065  |      |
| 2   | 7,73 | 5797605 | 89,935  |      |
|     |      | 6446439 | 100,000 |      |

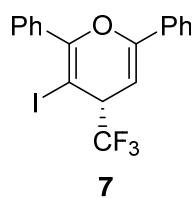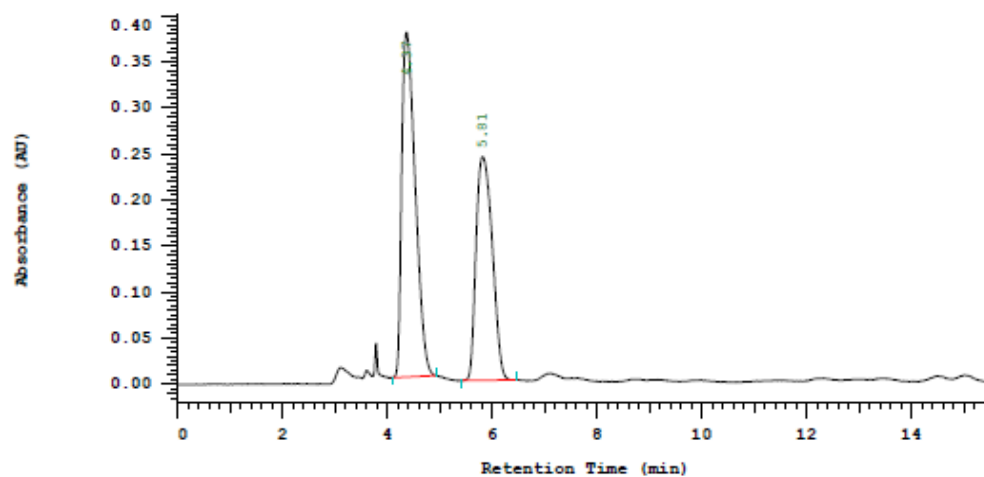

| No. | RT   | Area    | Area %  | Name |
|-----|------|---------|---------|------|
| 1   | 4.37 | 3358774 | 56.245  |      |
| 2   | 5.81 | 2612945 | 43.755  |      |
|     |      | 5971719 | 100.000 |      |

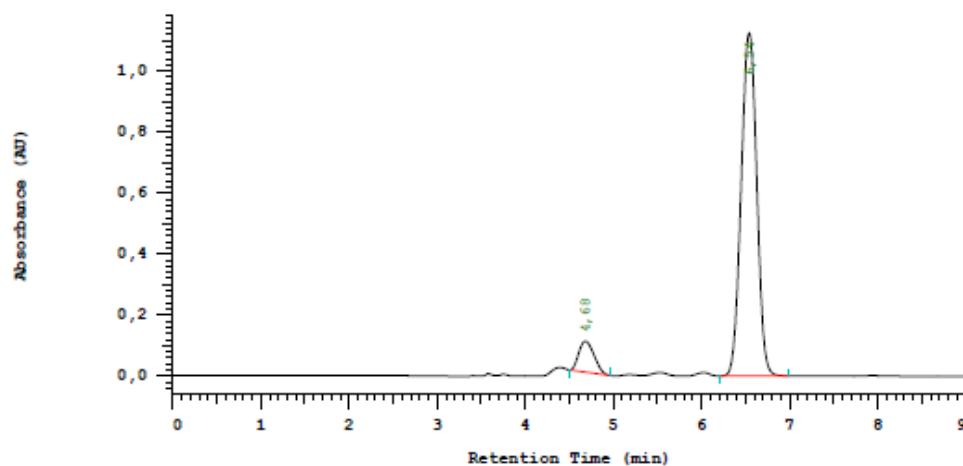

| No. | RT   | Area    | Area %  | Name |
|-----|------|---------|---------|------|
| 1   | 4,68 | 610950  | 8,102   |      |
| 2   | 6,54 | 6930169 | 91,898  |      |
|     |      | 7541119 | 100,000 |      |
